# Supplementary material for: Serial in-solution digestion protocol for mass spectrometry-based glycomics and proteomics analysis
Source: Royal Society of Chemistry journal article supplement (doi:10.1039/d0mo00019a), 2020-04-06
Supplement: d0mo00019a2.xlsx [file d0mo00019a2.xlsx]

## Sheet: Lysate-batch01
Protein Group	Protein ID	Accession	-10lgP	Coverage (%)	Coverage (%) Sample 1	Coverage (%) Sample 2	Area Sample 1	Area Sample 2	#Peptides	#Unique	#Spec Sample 1	#Spec Sample 2	PTM	Avg. Mass	Description
16	16	tr|A3KGU7|A3KGU7_MOUSE	263.62	16	15	14	86400000	80800000	36	36	34	33	Deamidation N	285151	Spectrin alpha chain non-erythrocytic 1 OS=Mus musculus OX=10090 GN=Sptan1 PE=1 SV=1
16	17	tr|A3KGU9|A3KGU9_MOUSE	263.62	16	15	14	86400000	80800000	36	36	34	33	Deamidation N	287602	Spectrin alpha chain non-erythrocytic 1 OS=Mus musculus OX=10090 GN=Sptan1 PE=1 SV=2
24	14	Q68FD5|CLH1_MOUSE	261.84	20	18	16	136000000	114000000	29	29	33	29	Carbamidomethylation; Deamidation N	191555	Clathrin heavy chain 1 OS=Mus musculus OX=10090 GN=Cltc PE=1 SV=3
19	7	P07724|ALBU_MOUSE	270.23	44	43	39	263000000	253000000	27	27	33	29	Carbamidomethylation; Ubiquitination-K	68693	Serum albumin OS=Mus musculus OX=10090 GN=Alb PE=1 SV=3
5	1	Q6PIC6|AT1A3_MOUSE	317.98	44	41	39	459000000	439000000	40	25	58	52	Carbamidomethylation; Deamidation N	111691	Sodium/potassium-transporting ATPase subunit alpha-3 OS=Mus musculus OX=10090 GN=Atp1a3 PE=1 SV=1
5	2	tr|A0A0G2JGX4|A0A0G2JGX4_MOUSE	317.98	44	40	39	459000000	439000000	40	25	58	52	Carbamidomethylation; Deamidation N	112988	Sodium/potassium-transporting ATPase subunit alpha OS=Mus musculus OX=10090 GN=Atp1a3 PE=1 SV=1
29	30	Q9QYR6|MAP1A_MOUSE	218.89	9	7	7	21600000	18400000	22	21	21	19	Carbamidomethylation; Ubiquitination-K	300139	Microtubule-associated protein 1A OS=Mus musculus OX=10090 GN=Map1a PE=1 SV=2
29	31	tr|A2ARP8|A2ARP8_MOUSE	218.89	9	7	7	21600000	18400000	22	21	21	19	Carbamidomethylation; Ubiquitination-K	325886	Microtubule-associated protein 1A OS=Mus musculus OX=10090 GN=Map1a PE=1 SV=1
39	12	Q99KI0|ACON_MOUSE	244.8	31	31	22	143000000	128000000	21	20	22	23	Carbamidomethylation; Deamidation N	85464	Aconitate hydratase mitochondrial OS=Mus musculus OX=10090 GN=Aco2 PE=1 SV=1
40	25	P20357|MTAP2_MOUSE	223	14	12	11	30500000	25400000	20	19	17	17	Carbamidomethylation; Phosphoserine (pS)	199130	Microtubule-associated protein 2 OS=Mus musculus OX=10090 GN=Map2 PE=1 SV=2
35	32	O08599|STXB1_MOUSE	243.77	35	29	28	171000000	143000000	18	18	23	21	Carbamidomethylation; Deamidation N; Ubiquitination-K	67569	Syntaxin-binding protein 1 OS=Mus musculus OX=10090 GN=Stxbp1 PE=1 SV=2
23	9	P63017|HSP7C_MOUSE	254.78	37	34	33	193000000	191000000	22	17	29	29	Carbamidomethylation; Deamidation N	70871	Heat shock cognate 71 kDa protein OS=Mus musculus OX=10090 GN=Hspa8 PE=1 SV=1
26	41	P16330|CN37_MOUSE	224.4	37	36	36	316000000	323000000	17	17	29	27	Carbamidomethylation; Deamidation N; HydroxylProline; Ubiquitination-K	47123	2' 3'-cyclic-nucleotide 3'-phosphodiesterase OS=Mus musculus OX=10090 GN=Cnp PE=1 SV=3
46	44	tr|D3Z6F5|D3Z6F5_MOUSE	220.06	30	29	27	349000000	318000000	17	17	21	20		54595	ATP synthase subunit alpha OS=Mus musculus OX=10090 GN=Atp5a1 PE=1 SV=1
46	45	Q03265|ATPA_MOUSE	220.06	27	26	24	349000000	318000000	17	17	21	20		59753	ATP synthase subunit alpha mitochondrial OS=Mus musculus OX=10090 GN=Atp5f1a PE=1 SV=1
47	33	P46460|NSF_MOUSE	217.07	25	25	25	102000000	98700000	17	17	19	21	Carbamidomethylation	82613	Vesicle-fusing ATPase OS=Mus musculus OX=10090 GN=Nsf PE=1 SV=2
41	38	tr|A0A0J9YUN4|A0A0J9YUN4_MOUSE	204.47	20	20	16	150000000	132000000	17	17	21	18	Carbamidomethylation; Deamidation N	97295	Dynamin-1 OS=Mus musculus OX=10090 GN=Dnm1 PE=1 SV=1
25	23	P07901|HS90A_MOUSE	239.72	31	26	31	99500000	76100000	23	15	28	30	HydroxylProline; Ubiquitination-K	84788	Heat shock protein HSP 90-alpha OS=Mus musculus OX=10090 GN=Hsp90aa1 PE=1 SV=4
49	43	P05202|AATM_MOUSE	203.42	37	30	37	195000000	143000000	15	15	17	20	Carbamidomethylation; Deamidation N	47411	Aspartate aminotransferase mitochondrial OS=Mus musculus OX=10090 GN=Got2 PE=1 SV=1
64	107	Q9JHU4|DYHC1_MOUSE	140.61	3	3	1	6840000	15600000	15	15	13	7	Carbamidomethylation	532050	Cytoplasmic dynein 1 heavy chain 1 OS=Mus musculus OX=10090 GN=Dync1h1 PE=1 SV=2
93	54	Q9DB77|QCR2_MOUSE	208.83	34	26	26	59500000	47500000	14	14	10	12	Carbamidomethylation; Deamidation N	48235	Cytochrome b-c1 complex subunit 2 mitochondrial OS=Mus musculus OX=10090 GN=Uqcrc2 PE=1 SV=1
73	61	Q62261|SPTB2_MOUSE	163.82	6	6	4	15200000	8580000	15	14	13	10	Carbamidomethylation	274221	Spectrin beta chain non-erythrocytic 1 OS=Mus musculus OX=10090 GN=Sptbn1 PE=1 SV=2
14	5	Q6PIE5|AT1A2_MOUSE	285.77	29	25	28	93400000	89000000	28	13	40	40	Carbamidomethylation; Deamidation N	112217	Sodium/potassium-transporting ATPase subunit alpha-2 OS=Mus musculus OX=10090 GN=Atp1a2 PE=1 SV=1
28	24	P11499|HS90B_MOUSE	248.56	28	26	28	72000000	70600000	22	13	28	28	Carbamidomethylation; Phosphoserine (pS)	83281	Heat shock protein HSP 90-beta OS=Mus musculus OX=10090 GN=Hsp90ab1 PE=1 SV=3
34	22	O08553|DPYL2_MOUSE	243.73	38	35	33	246000000	233000000	18	13	27	24	Carbamidomethylation; Deamidation N	62278	Dihydropyrimidinase-related protein 2 OS=Mus musculus OX=10090 GN=Dpysl2 PE=1 SV=2
45	49	P08249|MDHM_MOUSE	213.84	43	43	38	196000000	198000000	13	13	20	21	Carbamidomethylation	35611	Malate dehydrogenase mitochondrial OS=Mus musculus OX=10090 GN=Mdh2 PE=1 SV=3
61	59	P52480|KPYM_MOUSE	209.4	26	21	23	210000000	170000000	13	13	14	15	Carbamidomethylation	57845	Pyruvate kinase PKM OS=Mus musculus OX=10090 GN=Pkm PE=1 SV=4
67	42	P05201|AATC_MOUSE	190.7	42	29	42	79000000	71300000	13	13	11	14	Deamidation N	46248	Aspartate aminotransferase cytoplasmic OS=Mus musculus OX=10090 GN=Got1 PE=1 SV=3
59	52	tr|G3UVV4|G3UVV4_MOUSE	170.5	15	14	11	40700000	48900000	15	13	15	12	Carbamidomethylation; Deamidation N	101873	Hexokinase 1 isoform CRA_f OS=Mus musculus OX=10090 GN=Hk1 PE=1 SV=1
59	53	P17710|HXK1_MOUSE	170.5	14	13	10	40700000	48900000	15	13	15	12	Carbamidomethylation; Deamidation N	108303	Hexokinase-1 OS=Mus musculus OX=10090 GN=Hk1 PE=1 SV=3
51	80	P17751|TPIS_MOUSE	219.07	46	46	46	106000000	120000000	12	12	17	17	Carbamidomethylation; Deamidation N	32192	Triosephosphate isomerase OS=Mus musculus OX=10090 GN=Tpi1 PE=1 SV=4
48	76	P56480|ATPB_MOUSE	207.59	26	21	26	221000000	196000000	12	12	18	19	Deamidation N	56301	ATP synthase subunit beta mitochondrial OS=Mus musculus OX=10090 GN=Atp5f1b PE=1 SV=2
31	78	P60202|MYPR_MOUSE	198.01	57	57	49	1090000000	1110000000	12	12	28	25	Carbamidomethylation; Deamidation N; Ubiquitination-K	30077	Myelin proteolipid protein OS=Mus musculus OX=10090 GN=Plp1 PE=1 SV=2
75	104	P43006|EAA2_MOUSE	195.2	22	18	18	82500000	73700000	12	12	11	15	Carbamidomethylation; Deamidation N	62030	Excitatory amino acid transporter 2 OS=Mus musculus OX=10090 GN=Slc1a2 PE=1 SV=1
104	57	Q8BH59|CMC1_MOUSE	182.53	20	14	14	18000000	19600000	12	12	10	9	Carbamidomethylation	74570	Calcium-binding mitochondrial carrier protein Aralar1 OS=Mus musculus OX=10090 GN=Slc25a12 PE=1 SV=1
52	87	Q9CZU6|CISY_MOUSE	178.66	22	22	19	107000000	149000000	12	12	18	17	Carbamidomethylation	51737	Citrate synthase mitochondrial OS=Mus musculus OX=10090 GN=Cs PE=1 SV=1
18	6	Q8VDN2|AT1A1_MOUSE	278.45	27	24	26	99500000	93800000	26	11	36	33	Carbamidomethylation; Deamidation N	112982	Sodium/potassium-transporting ATPase subunit alpha-1 OS=Mus musculus OX=10090 GN=Atp1a1 PE=1 SV=1
37	122	Q91XV3|BASP1_MOUSE	214.93	68	68	68	94600000	113000000	11	11	20	22	Deamidation N; HydroxylProline; HexNac; Ubiquitination-K	22087	Brain acid soluble protein 1 OS=Mus musculus OX=10090 GN=Basp1 PE=1 SV=3
43	46	P17182|ENOA_MOUSE	205.39	38	31	36	224000000	207000000	14	11	21	22	Carbamidomethylation; Deamidation N	47141	Alpha-enolase OS=Mus musculus OX=10090 GN=Eno1 PE=1 SV=3
44	136	P14094|AT1B1_MOUSE	184.6	29	29	29	274000000	277000000	11	11	23	20	Carbamidomethylation	35195	Sodium/potassium-transporting ATPase subunit beta-1 OS=Mus musculus OX=10090 GN=Atp1b1 PE=1 SV=1
68	72	P09411|PGK1_MOUSE	204.14	29	29	25	78900000	81900000	10	10	12	12	Carbamidomethylation; Deamidation N	44550	Phosphoglycerate kinase 1 OS=Mus musculus OX=10090 GN=Pgk1 PE=1 SV=4
62	66	P05063|ALDOC_MOUSE	186.29	40	39	29	51500000	49700000	14	10	17	12	Carbamidomethylation; Deamidation N	39395	Fructose-bisphosphate aldolase C OS=Mus musculus OX=10090 GN=Aldoc PE=1 SV=4
57	96	P14152|MDHC_MOUSE	182.33	34	33	34	142000000	147000000	10	10	13	15	Carbamidomethylation; Deamidation N	36511	Malate dehydrogenase cytoplasmic OS=Mus musculus OX=10090 GN=Mdh1 PE=1 SV=3
95	69	P62814|VATB2_MOUSE	175.55	26	26	20	75300000	90900000	10	10	12	8	Carbamidomethylation; Deamidation N	56551	V-type proton ATPase subunit B brain isoform OS=Mus musculus OX=10090 GN=Atp6v1b2 PE=1 SV=1
89	74	P63038|CH60_MOUSE	170.8	19	19	17	60600000	76600000	11	10	13	10	Deamidation N	60956	60 kDa heat shock protein mitochondrial OS=Mus musculus OX=10090 GN=Hspd1 PE=1 SV=1
107	88	Q02053|UBA1_MOUSE	170.33	10	8	9	14900000	8940000	10	10	8	9	Carbamidomethylation	117809	Ubiquitin-like modifier-activating enzyme 1 OS=Mus musculus OX=10090 GN=Uba1 PE=1 SV=1
101	86	Q01853|TERA_MOUSE	165.53	14	11	12	37200000	31100000	10	10	9	9	Carbamidomethylation	89322	Transitional endoplasmic reticulum ATPase OS=Mus musculus OX=10090 GN=Vcp PE=1 SV=4
90	132	P15105|GLNA_MOUSE	188.95	26	21	24	56600000	54100000	9	9	9	11	Carbamidomethylation; Deamidation N	42120	Glutamine synthetase OS=Mus musculus OX=10090 GN=Glul PE=1 SV=6
96	85	P38647|GRP75_MOUSE	183.18	17	16	17	12000000	10900000	10	9	9	10		73461	Stress-70 protein mitochondrial OS=Mus musculus OX=10090 GN=Hspa9 PE=1 SV=3
85	98	P12960|CNTN1_MOUSE	182.05	11	11	8	27200000	28700000	9	9	11	9		113388	Contactin-1 OS=Mus musculus OX=10090 GN=Cntn1 PE=1 SV=1
110	114	Q9CZ13|QCR1_MOUSE	172.4	22	18	16	23600000	35100000	9	9	9	8	Carbamidomethylation; Deamidation N	52852	Cytochrome b-c1 complex subunit 1 mitochondrial OS=Mus musculus OX=10090 GN=Uqcrc1 PE=1 SV=2
74	97	P26443|DHE3_MOUSE	168.65	19	16	19	63200000	55200000	9	9	11	14	Carbamidomethylation; Deamidation N	61337	Glutamate dehydrogenase 1 mitochondrial OS=Mus musculus OX=10090 GN=Glud1 PE=1 SV=1
122	226	P61264|STX1B_MOUSE	163.89	29	29	19	63200000	101000000	9	9	10	7	Phosphoserine (pS)	33245	Syntaxin-1B OS=Mus musculus OX=10090 GN=Stx1b PE=1 SV=1
171	117	tr|A0A076FR46|A0A076FR46_MOUSE	153.55	9	5	8	12200000	9180000	9	9	6	7	Deamidation N	125599	KCC2a-S25 variant 1 OS=Mus musculus OX=10090 GN=Slc12a5 PE=1 SV=1
171	118	Q91V14|S12A5_MOUSE	153.55	9	5	8	12200000	9180000	9	9	6	7	Deamidation N	126271	Solute carrier family 12 member 5 OS=Mus musculus OX=10090 GN=Slc12a5 PE=1 SV=2
97	109	P50516|VATA_MOUSE	153.16	14	14	14	71700000	70200000	9	9	11	11		68326	V-type proton ATPase catalytic subunit A OS=Mus musculus OX=10090 GN=Atp6v1a PE=1 SV=2
86	100	Q9Z0E0|NCDN_MOUSE	147.03	14	14	11	13500000	14900000	9	9	12	10	Carbamidomethylation	78895	Neurochondrin OS=Mus musculus OX=10090 GN=Ncdn PE=1 SV=1
55	99	Q04447|KCRB_MOUSE	205.88	36	31	35	105000000	92800000	10	8	17	16	Carbamidomethylation; Deamidation N	42713	Creatine kinase B-type OS=Mus musculus OX=10090 GN=Ckb PE=1 SV=1
69	84	P18872|GNAO_MOUSE	192.41	31	31	28	121000000	104000000	10	8	13	12	Carbamidomethylation	40085	Guanine nucleotide-binding protein G(o) subunit alpha OS=Mus musculus OX=10090 GN=Gnao1 PE=1 SV=3
38	459	P0DP26|CALM1_MOUSE	192.08	32	32	31	291000000	329000000	8	8	22	20	Deamidation N	16838	Calmodulin-1 OS=Mus musculus OX=10090 GN=Calm1 PE=1 SV=1
38	458	P0DP28|CALM3_MOUSE	192.08	32	32	31	291000000	329000000	8	8	22	20	Deamidation N	16838	Calmodulin-3 OS=Mus musculus OX=10090 GN=Calm3 PE=1 SV=1
38	457	P0DP27|CALM2_MOUSE	192.08	32	32	31	291000000	329000000	8	8	22	20	Deamidation N	16838	Calmodulin-2 OS=Mus musculus OX=10090 GN=Calm2 PE=1 SV=1
38	460	tr|Q3UKW2|Q3UKW2_MOUSE	192.08	24	24	23	291000000	329000000	8	8	22	20	Deamidation N	21560	Calmodulin-1 OS=Mus musculus OX=10090 GN=Calm1 PE=1 SV=1
66	211	tr|Q91VB8|Q91VB8_MOUSE	188.73	51	51	51	741000000	668000000	8	8	15	13		15112	Alpha globin 1 OS=Mus musculus OX=10090 GN=Hba-a1 PE=1 SV=1
66	210	P01942|HBA_MOUSE	188.73	51	51	51	741000000	668000000	8	8	15	13		15085	Hemoglobin subunit alpha OS=Mus musculus OX=10090 GN=Hba PE=1 SV=2
88	328	P06837|NEUM_MOUSE	188.56	33	33	33	24800000	23100000	8	8	11	12		23632	Neuromodulin OS=Mus musculus OX=10090 GN=Gap43 PE=1 SV=1
116	91	P06745|G6PI_MOUSE	171.85	19	16	15	30700000	40300000	9	8	8	7		62767	Glucose-6-phosphate isomerase OS=Mus musculus OX=10090 GN=Gpi PE=1 SV=4
82	123	Q60932|VDAC1_MOUSE	166.19	35	28	29	69100000	51400000	9	8	10	11	Carbamidomethylation; Deamidation N	32351	Voltage-dependent anion-selective channel protein 1 OS=Mus musculus OX=10090 GN=Vdac1 PE=1 SV=3
71	330	tr|F6VME3|F6VME3_MOUSE	165.91	38	38	37	285000000	261000000	8	8	15	12	Oxidation (M)	20948	Myelin basic protein (Fragment) OS=Mus musculus OX=10090 GN=Mbp PE=1 SV=1
71	331	tr|F6RT34|F6RT34_MOUSE	165.91	35	35	34	285000000	261000000	8	8	15	12	Oxidation (M)	23205	Myelin basic protein (Fragment) OS=Mus musculus OX=10090 GN=Mbp PE=1 SV=1
138	175	Q9D6R2|IDH3A_MOUSE	164.94	19	16	19	67700000	57300000	8	8	7	8	Carbamidomethylation	39639	Isocitrate dehydrogenase [NAD] subunit alpha mitochondrial OS=Mus musculus OX=10090 GN=Idh3a PE=1 SV=1
138	176	tr|A0A1L1STE6|A0A1L1STE6_MOUSE	164.94	18	16	18	67700000	57300000	8	8	7	8	Carbamidomethylation	41520	Isocitrate dehydrogenase [NAD] subunit mitochondrial OS=Mus musculus OX=10090 GN=Idh3a PE=1 SV=1
120	155	Q8QZT1|THIL_MOUSE	152.63	22	20	18	12200000	34500000	8	8	8	9		44816	Acetyl-CoA acetyltransferase mitochondrial OS=Mus musculus OX=10090 GN=Acat1 PE=1 SV=1
132	197	tr|A0A338P6R8|A0A338P6R8_MOUSE	139.59	21	18	16	31900000	28700000	8	8	8	8	Carbamidomethylation	41950	Uncharacterized protein OS=Mus musculus OX=10090 GN=Gm49601 PE=3 SV=1
132	199	tr|A0A338P769|A0A338P769_MOUSE	139.59	20	18	16	31900000	28700000	8	8	8	8	Carbamidomethylation	43816	Septin-5 OS=Mus musculus OX=10090 GN=Sept5 PE=1 SV=1
84	174	Q8VEM8|MPCP_MOUSE	135.98	23	23	18	96800000	89600000	8	8	12	11	Carbamidomethylation	39632	Phosphate carrier protein mitochondrial OS=Mus musculus OX=10090 GN=Slc25a3 PE=1 SV=1
111	124	tr|Q3TWV4|Q3TWV4_MOUSE	125.49	18	13	17	25400000	26500000	9	8	8	9		49389	AP-2 complex subunit mu OS=Mus musculus OX=10090 GN=Ap2m1 PE=1 SV=1
111	125	P84091|AP2M1_MOUSE	125.49	18	13	17	25400000	26500000	9	8	8	9		49655	AP-2 complex subunit mu OS=Mus musculus OX=10090 GN=Ap2m1 PE=1 SV=1
155	198	tr|A7E1Z5|A7E1Z5_MOUSE	109.58	9	9	6	10400000	13200000	8	8	8	6	Carbamidomethylation; Deamidation N	120464	Anion exchange protein OS=Mus musculus OX=10090 GN=Slc4a4 PE=1 SV=1
155	200	O88343|S4A4_MOUSE	109.58	9	9	6	10400000	13200000	8	8	8	6	Carbamidomethylation; Deamidation N	121483	Electrogenic sodium bicarbonate cotransporter 1 OS=Mus musculus OX=10090 GN=Slc4a4 PE=1 SV=2
155	201	tr|E9Q8N8|E9Q8N8_MOUSE	109.58	8	8	6	10400000	13200000	8	8	8	6	Carbamidomethylation; Deamidation N	123086	Anion exchange protein OS=Mus musculus OX=10090 GN=Slc4a4 PE=1 SV=1
53	137	P63101|1433Z_MOUSE	198.71	38	31	33	150000000	99400000	10	7	18	16	Carbamidomethylation; Deamidation N	27771	14-3-3 protein zeta/delta OS=Mus musculus OX=10090 GN=Ywhaz PE=1 SV=1
60	101	P68254|1433T_MOUSE	174.46	42	36	42	27700000	15300000	11	7	15	16	Carbamidomethylation; Deamidation N	27778	14-3-3 protein theta OS=Mus musculus OX=10090 GN=Ywhaq PE=1 SV=1
60	102	tr|F6YY69|F6YY69_MOUSE	174.46	36	31	36	27700000	15300000	11	7	15	16	Carbamidomethylation; Deamidation N	32341	14-3-3 protein theta (Fragment) OS=Mus musculus OX=10090 GN=Ywhaq PE=1 SV=1
60	103	tr|F6VW30|F6VW30_MOUSE	174.46	34	29	34	27700000	15300000	11	7	15	16	Carbamidomethylation; Deamidation N	34349	14-3-3 protein theta (Fragment) OS=Mus musculus OX=10090 GN=Ywhaq PE=1 SV=1
114	219	P26645|MARCS_MOUSE	172.95	29	29	24	27200000	24200000	7	7	8	8	Deamidation N	29661	Myristoylated alanine-rich C-kinase substrate OS=Mus musculus OX=10090 GN=Marcks PE=1 SV=2
117	94	Q8CI94|PYGB_MOUSE	168.26	13	11	10	8470000	8090000	9	7	8	7	Deamidation N	96730	Glycogen phosphorylase brain form OS=Mus musculus OX=10090 GN=Pygb PE=1 SV=3
149	172	Q9D0M3|CY1_MOUSE	167	27	23	19	22600000	33200000	7	7	7	7	Carbamidomethylation; Deamidation N	35328	Cytochrome c1 heme protein mitochondrial OS=Mus musculus OX=10090 GN=Cyc1 PE=1 SV=1
79	62	P17426|AP2A1_MOUSE	165.9	13	11	11	10200000	10900000	13	7	12	12	Carbamidomethylation	107664	AP-2 complex subunit alpha-1 OS=Mus musculus OX=10090 GN=Ap2a1 PE=1 SV=1
185	238	Q9DCX2|ATP5H_MOUSE	160.34	46	35	46	47700000	40400000	7	7	5	7		18749	ATP synthase subunit d mitochondrial OS=Mus musculus OX=10090 GN=Atp5pd PE=1 SV=3
94	68	P17427|AP2A2_MOUSE	155.04	14	11	10	10500000	10500000	13	7	11	10	Carbamidomethylation	104016	AP-2 complex subunit alpha-2 OS=Mus musculus OX=10090 GN=Ap2a2 PE=1 SV=2
136	165	P97300|NPTN_MOUSE	149.92	21	18	16	22800000	22200000	7	7	7	8	Carbamidomethylation	44373	Neuroplastin OS=Mus musculus OX=10090 GN=Nptn PE=1 SV=3
78	146	O55131|SEPT7_MOUSE	147.13	20	20	20	12500000	11700000	8	7	12	12	Carbamidomethylation; Deamidation N	50550	Septin-7 OS=Mus musculus OX=10090 GN=Sept7 PE=1 SV=1
78	148	tr|E9Q9F5|E9Q9F5_MOUSE	147.13	20	20	20	12500000	11700000	8	7	12	12	Carbamidomethylation; Deamidation N	50681	Septin-7 OS=Mus musculus OX=10090 GN=Sept7 PE=1 SV=2
78	147	tr|E9Q1G8|E9Q1G8_MOUSE	147.13	20	20	20	12500000	11700000	8	7	12	12	Carbamidomethylation; Deamidation N	50649	Septin-7 OS=Mus musculus OX=10090 GN=Sept7 PE=1 SV=2
152	181	O08749|DLDH_MOUSE	145.62	16	16	11	30900000	24400000	7	7	8	6	Carbamidomethylation	54272	Dihydrolipoyl dehydrogenase mitochondrial OS=Mus musculus OX=10090 GN=Dld PE=1 SV=2
150	173	P31650|S6A11_MOUSE	144.02	14	14	12	21500000	23600000	7	7	8	6	Carbamidomethylation; Deamidation N	69961	Sodium- and chloride-dependent GABA transporter 3 OS=Mus musculus OX=10090 GN=Slc6a11 PE=1 SV=2
175	218	P62827|RAN_MOUSE	140.82	31	20	23	14000000	16400000	7	7	5	5	Carbamidomethylation	24423	GTP-binding nuclear protein Ran OS=Mus musculus OX=10090 GN=Ran PE=1 SV=3
119	149	tr|A0A1B0GSR9|A0A1B0GSR9_MOUSE	138.8	25	25	25	41600000	44100000	8	7	9	8	Carbamidomethylation	34599	L-lactate dehydrogenase OS=Mus musculus OX=10090 GN=Ldha PE=1 SV=1
119	151	P06151|LDHA_MOUSE	138.8	23	23	23	41600000	44100000	8	7	9	8	Carbamidomethylation	36499	L-lactate dehydrogenase A chain OS=Mus musculus OX=10090 GN=Ldha PE=1 SV=3
119	150	tr|Q564E2|Q564E2_MOUSE	138.8	23	23	23	41600000	44100000	8	7	9	8	Carbamidomethylation	36499	L-lactate dehydrogenase OS=Mus musculus OX=10090 GN=Ldha PE=1 SV=1
119	152	tr|A0A1B0GSX0|A0A1B0GSX0_MOUSE	138.8	22	22	22	41600000	44100000	8	7	9	8	Carbamidomethylation	39758	L-lactate dehydrogenase OS=Mus musculus OX=10090 GN=Ldha PE=1 SV=1
151	177	P51863|VA0D1_MOUSE	132.49	20	17	14	16800000	15900000	7	7	7	5	Carbamidomethylation	40301	V-type proton ATPase subunit d 1 OS=Mus musculus OX=10090 GN=Atp6v0d1 PE=1 SV=2
154	188	tr|A0A0A6YW88|A0A0A6YW88_MOUSE	132.44	15	12	15	10600000	9260000	7	7	6	7	Carbamidomethylation	51675	CaM kinase-like vesicle-associated protein OS=Mus musculus OX=10090 GN=Camkv PE=1 SV=1
154	189	Q3UHL1|CAMKV_MOUSE	132.44	14	12	14	10600000	9260000	7	7	6	7	Carbamidomethylation	54819	CaM kinase-like vesicle-associated protein OS=Mus musculus OX=10090 GN=Camkv PE=1 SV=2
145	357	P17742|PPIA_MOUSE	130.95	35	35	25	66300000	67000000	7	7	8	6	Carbamidomethylation; Deamidation N	17971	Peptidyl-prolyl cis-trans isomerase A OS=Mus musculus OX=10090 GN=Ppia PE=1 SV=2
153	184	Q8K0U4|HS12A_MOUSE	130.47	12	12	9	8280000	9040000	7	7	7	5		74871	Heat shock 70 kDa protein 12A OS=Mus musculus OX=10090 GN=Hspa12a PE=1 SV=1
123	193	Q61316|HSP74_MOUSE	116.31	12	12	7	4870000	3980000	7	7	9	5	Deamidation N	94133	Heat shock 70 kDa protein 4 OS=Mus musculus OX=10090 GN=Hspa4 PE=1 SV=1
123	194	tr|Q3U2G2|Q3U2G2_MOUSE	116.31	12	12	7	4870000	3980000	7	7	9	5	Deamidation N	94209	Heat shock 70 kDa protein 4 OS=Mus musculus OX=10090 GN=Hspa4 PE=1 SV=1
188	271	P14211|CALR_MOUSE	110.43	12	10	10	23000000	25300000	7	7	7	5		47995	Calreticulin OS=Mus musculus OX=10090 GN=Calr PE=1 SV=1
157	301	Q9CZW5|TOM70_MOUSE	87.38	10	9	8	13600000	9900000	7	7	6	6		67590	Mitochondrial import receptor subunit TOM70 OS=Mus musculus OX=10090 GN=Tomm70 PE=1 SV=2
109	110	P50396|GDIA_MOUSE	172.07	26	18	26	22000000	16900000	10	6	8	10	Carbamidomethylation; Deamidation N	50522	Rab GDP dissociation inhibitor alpha OS=Mus musculus OX=10090 GN=Gdi1 PE=1 SV=3
56	142	P62259|1433E_MOUSE	163.74	33	33	33	70000000	69400000	9	6	17	16	Carbamidomethylation	29174	14-3-3 protein epsilon OS=Mus musculus OX=10090 GN=Ywhae PE=1 SV=1
72	356	P35802|GPM6A_MOUSE	162.74	18	18	18	109000000	121000000	7	6	13	14	Carbamidomethylation	31149	Neuronal membrane glycoprotein M6-a OS=Mus musculus OX=10090 GN=Gpm6a PE=1 SV=1
87	196	P16125|LDHB_MOUSE	160.87	23	23	20	69600000	61700000	8	6	11	11	Carbamidomethylation; Deamidation N	36572	L-lactate dehydrogenase B chain OS=Mus musculus OX=10090 GN=Ldhb PE=1 SV=2
102	135	P46096|SYT1_MOUSE	160.03	19	17	19	45900000	36200000	9	6	10	11		47418	Synaptotagmin-1 OS=Mus musculus OX=10090 GN=Syt1 PE=1 SV=1
174	209	Q8VDQ8|SIR2_MOUSE	159.03	19	17	19	15700000	15700000	6	6	5	6	Deamidation N	43256	NAD-dependent protein deacetylase sirtuin-2 OS=Mus musculus OX=10090 GN=Sirt2 PE=1 SV=2
140	215	Q61644|PACN1_MOUSE	156.95	17	17	17	20400000	9180000	6	6	6	7	Carbamidomethylation; Deamidation N	50575	Protein kinase C and casein kinase substrate in neurons protein 1 OS=Mus musculus OX=10090 GN=Pacsin1 PE=1 SV=1
234	236	tr|B2M1R6|B2M1R6_MOUSE	150.78	16	10	14	11400000	14400000	6	6	5	5	Carbamidomethylation	48562	Heterogeneous nuclear ribonucleoprotein K OS=Mus musculus OX=10090 GN=Hnrnpk PE=1 SV=1
234	237	P61979|HNRPK_MOUSE	150.78	15	10	13	11400000	14400000	6	6	5	5	Carbamidomethylation	50976	Heterogeneous nuclear ribonucleoprotein K OS=Mus musculus OX=10090 GN=Hnrnpk PE=1 SV=1
156	205	Q61548|AP180_MOUSE	146.85	7	7	7	28600000	19200000	6	6	5	7	Deamidation N	91851	Clathrin coat assembly protein AP180 OS=Mus musculus OX=10090 GN=Snap91 PE=1 SV=1
133	217	Q8BMF4|ODP2_MOUSE	144.66	11	11	11	16200000	17100000	6	6	7	8	Carbamidomethylation	67942	Dihydrolipoyllysine-residue acetyltransferase component of pyruvate dehydrogenase complex mitochondrial OS=Mus musculus OX=10090 GN=Dlat PE=1 SV=2
187	252	Q9R0P9|UCHL1_MOUSE	144.51	38	38	29	59700000	57300000	6	6	7	5	Carbamidomethylation; Deamidation N	24838	Ubiquitin carboxyl-terminal hydrolase isozyme L1 OS=Mus musculus OX=10090 GN=Uchl1 PE=1 SV=1
159	382	Q9DB20|ATPO_MOUSE	144.03	29	29	25	39600000	41700000	6	6	7	5		23364	ATP synthase subunit O mitochondrial OS=Mus musculus OX=10090 GN=Atp5po PE=1 SV=1
108	115	P11798|KCC2A_MOUSE	143.13	20	18	16	22000000	19900000	9	6	9	9		54115	Calcium/calmodulin-dependent protein kinase type II subunit alpha OS=Mus musculus OX=10090 GN=Camk2a PE=1 SV=2
108	116	tr|F8WIS9|F8WIS9_MOUSE	143.13	19	17	15	22000000	19900000	9	6	9	9		55347	Calcium/calmodulin-dependent protein kinase type II subunit alpha OS=Mus musculus OX=10090 GN=Camk2a PE=1 SV=1
176	233	tr|K3W4T3|K3W4T3_MOUSE	139.22	7	7	7	13000000	13800000	6	6	6	6		96427	V-type proton ATPase subunit a OS=Mus musculus OX=10090 GN=Atp6v0a1 PE=1 SV=1
176	234	Q9Z1G4|VPP1_MOUSE	139.22	7	7	7	13000000	13800000	6	6	6	6		96467	V-type proton ATPase 116 kDa subunit a isoform 1 OS=Mus musculus OX=10090 GN=Atp6v0a1 PE=1 SV=3
199	384	Q62277|SYPH_MOUSE	139.19	32	16	32	62900000	55500000	6	6	4	7	Carbamidomethylation; Deamidation N	34025	Synaptophysin OS=Mus musculus OX=10090 GN=Syp PE=1 SV=2
183	179	tr|Q50HX3|Q50HX3_MOUSE	138.85	48	44	25	6210000	5440000	7	6	7	5	Deamidation N	21889	RAB14 protein variant OS=Mus musculus OX=10090 GN=Rab14 PE=1 SV=1
183	180	Q91V41|RAB14_MOUSE	138.85	44	40	23	6210000	5440000	7	6	7	5	Deamidation N	23897	Ras-related protein Rab-14 OS=Mus musculus OX=10090 GN=Rab14 PE=1 SV=3
210	231	Q61553|FSCN1_MOUSE	138.65	13	8	13	12600000	8120000	6	6	5	6	Carbamidomethylation	54508	Fascin OS=Mus musculus OX=10090 GN=Fscn1 PE=1 SV=4
91	187	P14873|MAP1B_MOUSE	137.76	3	3	2	3840000	35300000	7	6	7	6	Carbamidomethylation	270252	Microtubule-associated protein 1B OS=Mus musculus OX=10090 GN=Map1b PE=1 SV=2
207	204	P40142|TKT_MOUSE	134.36	12	10	6	10400000	17700000	6	6	5	4		67631	Transketolase OS=Mus musculus OX=10090 GN=Tkt PE=1 SV=1
190	278	Q6ZQ38|CAND1_MOUSE	134	5	5	5	9990000	2340000	6	6	5	5		136331	Cullin-associated NEDD8-dissociated protein 1 OS=Mus musculus OX=10090 GN=Cand1 PE=1 SV=2
184	212	Q91VD9|NDUS1_MOUSE	133.48	9	9	4	10800000	18100000	6	6	6	3	Carbamidomethylation	79777	NADH-ubiquinone oxidoreductase 75 kDa subunit mitochondrial OS=Mus musculus OX=10090 GN=Ndufs1 PE=1 SV=2
209	228	tr|D3Z0Y2|D3Z0Y2_MOUSE	133.1	31	31	26	27600000	31400000	6	6	6	5	Carbamidomethylation; Deamidation N	22494	Peroxiredoxin-6 OS=Mus musculus OX=10090 GN=Prdx6 PE=1 SV=1
209	230	O08709|PRDX6_MOUSE	133.1	28	28	24	27600000	31400000	6	6	6	5	Carbamidomethylation; Deamidation N	24871	Peroxiredoxin-6 OS=Mus musculus OX=10090 GN=Prdx6 PE=1 SV=3
209	229	tr|Q6GT24|Q6GT24_MOUSE	133.1	28	28	24	27600000	31400000	6	6	6	5	Carbamidomethylation; Deamidation N	24827	Peroxiredoxin-6 OS=Mus musculus OX=10090 GN=Prdx6 PE=1 SV=1
194	324	P27773|PDIA3_MOUSE	128.74	12	10	10	6020000	5570000	6	6	5	5		56678	Protein disulfide-isomerase A3 OS=Mus musculus OX=10090 GN=Pdia3 PE=1 SV=2
258	264	P00920|CAH2_MOUSE	128.01	25	14	22	32000000	28700000	6	6	4	5		29033	Carbonic anhydrase 2 OS=Mus musculus OX=10090 GN=Ca2 PE=1 SV=4
186	247	tr|E9PZ00|E9PZ00_MOUSE	127.82	11	11	11	19400000	18500000	6	6	6	6	Carbamidomethylation	60672	Prosaposin OS=Mus musculus OX=10090 GN=Psap PE=1 SV=1
186	248	tr|Q8BFQ1|Q8BFQ1_MOUSE	127.82	11	11	11	19400000	18500000	6	6	6	6	Carbamidomethylation	61051	Prosaposin OS=Mus musculus OX=10090 GN=Psap PE=1 SV=1
186	249	tr|K3W4L3|K3W4L3_MOUSE	127.82	11	11	11	19400000	18500000	6	6	6	6	Carbamidomethylation	61292	Prosaposin OS=Mus musculus OX=10090 GN=Psap PE=1 SV=1
186	251	Q61207|SAP_MOUSE	127.82	11	11	11	19400000	18500000	6	6	6	6	Carbamidomethylation	61422	Prosaposin OS=Mus musculus OX=10090 GN=Psap PE=1 SV=2
186	250	tr|J3QPG5|J3QPG5_MOUSE	127.82	11	11	11	19400000	18500000	6	6	6	6	Carbamidomethylation	61363	Prosaposin OS=Mus musculus OX=10090 GN=Psap PE=1 SV=1
208	207	Q8BYI9|TENR_MOUSE	125.24	5	3	5	9750000	6730000	6	6	4	6		149589	Tenascin-R OS=Mus musculus OX=10090 GN=Tnr PE=1 SV=2
257	243	tr|Q3U4F0|Q3U4F0_MOUSE	125.22	24	16	21	9010000	6780000	6	6	4	5		30952	Sideroflexin-3 OS=Mus musculus OX=10090 GN=Sfxn3 PE=1 SV=1
257	244	Q91V61|SFXN3_MOUSE	125.22	21	14	19	9010000	6780000	6	6	4	5		35406	Sideroflexin-3 OS=Mus musculus OX=10090 GN=Sfxn3 PE=1 SV=1
212	253	tr|E9Q6Q4|E9Q6Q4_MOUSE	122.25	12	12	9	5810000	7270000	6	6	6	5		60793	RAP1 GTP-GDP dissociation stimulator 1 OS=Mus musculus OX=10090 GN=Rap1gds1 PE=1 SV=1
212	254	tr|Q3TU36|Q3TU36_MOUSE	122.25	11	11	8	5810000	7270000	6	6	6	5		66005	RAP1 GTP-GDP dissociation stimulator 1 OS=Mus musculus OX=10090 GN=Rap1gds1 PE=1 SV=1
212	255	tr|E9Q912|E9Q912_MOUSE	122.25	11	11	8	5810000	7270000	6	6	6	5		66077	RAP1 GTP-GDP dissociation stimulator 1 OS=Mus musculus OX=10090 GN=Rap1gds1 PE=1 SV=1
177	261	Q9Z2I9|SUCB1_MOUSE	120.72	12	12	12	30400000	18700000	6	6	6	6	Carbamidomethylation	50114	Succinate--CoA ligase [ADP-forming] subunit beta mitochondrial OS=Mus musculus OX=10090 GN=Sucla2 PE=1 SV=2
256	239	Q8K2B3|SDHA_MOUSE	118.79	10	10	5	9460000	21600000	6	6	6	3	Carbamidomethylation	72585	Succinate dehydrogenase [ubiquinone] flavoprotein subunit mitochondrial OS=Mus musculus OX=10090 GN=Sdha PE=1 SV=1
143	270	Q76MZ3|2AAA_MOUSE	117.95	11	11	10	25100000	26800000	6	6	7	6	Carbamidomethylation; Deamidation N	65323	Serine/threonine-protein phosphatase 2A 65 kDa regulatory subunit A alpha isoform OS=Mus musculus OX=10090 GN=Ppp2r1a PE=1 SV=3
235	246	P67778|PHB_MOUSE	116.64	22	14	22	15000000	9380000	6	6	4	6		29820	Prohibitin OS=Mus musculus OX=10090 GN=Phb PE=1 SV=1
233	220	Q8CHC4|SYNJ1_MOUSE	116.14	5	5	2	2650000	2260000	6	6	6	3	Carbamidomethylation	172616	Synaptojanin-1 OS=Mus musculus OX=10090 GN=Synj1 PE=1 SV=3
233	221	tr|D3Z656|D3Z656_MOUSE	116.14	5	5	2	2650000	2260000	6	6	6	3	Carbamidomethylation	176331	Synaptojanin-1 OS=Mus musculus OX=10090 GN=Synj1 PE=1 SV=1
236	269	P48036|ANXA5_MOUSE	114.84	17	17	12	4460000	7940000	6	6	6	4		35752	Annexin A5 OS=Mus musculus OX=10090 GN=Anxa5 PE=1 SV=1
237	279	Q921I1|TRFE_MOUSE	112.53	8	4	6	6200000	1060000	7	6	3	6	Carbamidomethylation	76724	Serotransferrin OS=Mus musculus OX=10090 GN=Tf PE=1 SV=1
259	276	Q8R081|HNRPL_MOUSE	101.35	14	5	14	1680000	1240000	6	6	3	6	Carbamidomethylation	63964	Heterogeneous nuclear ribonucleoprotein L OS=Mus musculus OX=10090 GN=Hnrnpl PE=1 SV=2
259	277	tr|G5E924|G5E924_MOUSE	101.35	13	5	13	1680000	1240000	6	6	3	6	Carbamidomethylation	66941	Heterogeneous nuclear ribonucleoprotein L (Fragment) OS=Mus musculus OX=10090 GN=Hnrnpl PE=1 SV=1
217	315	Q9Z1G3|VATC1_MOUSE	97.52	13	11	11	14600000	13600000	6	6	5	5	Carbamidomethylation	43888	V-type proton ATPase subunit C 1 OS=Mus musculus OX=10090 GN=Atp6v1c1 PE=1 SV=4
12	79	P02088|HBB1_MOUSE	215.72	80	80	80	462000000	432000000	13	5	46	44	Carbamidomethylation; Deamidation N	15840	Hemoglobin subunit beta-1 OS=Mus musculus OX=10090 GN=Hbb-b1 PE=1 SV=2
36	65	P48962|ADT1_MOUSE	179.2	43	43	43	125000000	113000000	11	5	23	23	Carbamidomethylation; Deamidation N	32904	ADP/ATP translocase 1 OS=Mus musculus OX=10090 GN=Slc25a4 PE=1 SV=4
50	67	P51881|ADT2_MOUSE	172.91	42	40	42	86600000	53900000	11	5	16	18	Carbamidomethylation	32931	ADP/ATP translocase 2 OS=Mus musculus OX=10090 GN=Slc25a5 PE=1 SV=3
77	112	P10126|EF1A1_MOUSE	165.35	23	23	23	26200000	29900000	11	5	13	12	Carbamidomethylation	50114	Elongation factor 1-alpha 1 OS=Mus musculus OX=10090 GN=Eef1a1 PE=1 SV=3
54	141	P61982|1433G_MOUSE	162.01	31	31	31	83000000	80300000	9	5	17	17	Carbamidomethylation	28303	14-3-3 protein gamma OS=Mus musculus OX=10090 GN=Ywhag PE=1 SV=2
130	162	P20029|BIP_MOUSE	155.19	13	11	11	7590000	7610000	7	5	7	7	Deamidation N	72422	Endoplasmic reticulum chaperone BiP OS=Mus musculus OX=10090 GN=Hspa5 PE=1 SV=3
165	463	P70296|PEBP1_MOUSE	153.42	33	33	33	36800000	34500000	5	5	6	8	Deamidation N	20830	Phosphatidylethanolamine-binding protein 1 OS=Mus musculus OX=10090 GN=Pebp1 PE=1 SV=3
178	336	P30275|KCRU_MOUSE	153.32	17	17	13	27200000	26800000	7	5	9	4	Carbamidomethylation; Deamidation N	47004	Creatine kinase U-type mitochondrial OS=Mus musculus OX=10090 GN=Ckmt1 PE=1 SV=1
124	202	O88935|SYN1_MOUSE	149.53	9	8	7	35700000	34800000	6	5	6	6		74097	Synapsin-1 OS=Mus musculus OX=10090 GN=Syn1 PE=1 SV=2
196	335	P61922|GABT_MOUSE	147.91	11	9	11	12100000	14400000	5	5	4	6	Carbamidomethylation	56452	4-aminobutyrate aminotransferase mitochondrial OS=Mus musculus OX=10090 GN=Abat PE=1 SV=1
211	235	P28663|SNAB_MOUSE	146.74	26	21	18	6390000	11000000	6	5	6	5	Carbamidomethylation	33557	Beta-soluble NSF attachment protein OS=Mus musculus OX=10090 GN=Napb PE=1 SV=2
144	308	P99029|PRDX5_MOUSE	142.65	31	31	31	38900000	37400000	5	5	7	7	Carbamidomethylation	21897	Peroxiredoxin-5 mitochondrial OS=Mus musculus OX=10090 GN=Prdx5 PE=1 SV=2
144	309	tr|H3BJQ7|H3BJQ7_MOUSE	142.65	31	31	31	38900000	37400000	5	5	7	7	Carbamidomethylation	22677	Peroxiredoxin OS=Mus musculus OX=10090 GN=Prdx5 PE=1 SV=1
213	257	P47857|PFKAM_MOUSE	141.33	9	8	7	6970000	7620000	6	5	5	5		85269	ATP-dependent 6-phosphofructokinase muscle type OS=Mus musculus OX=10090 GN=Pfkm PE=1 SV=3
160	403	P18760|COF1_MOUSE	136.67	27	27	27	52600000	47900000	5	5	5	8	Carbamidomethylation	18560	Cofilin-1 OS=Mus musculus OX=10090 GN=Cfl1 PE=1 SV=3
160	404	tr|F8WGL3|F8WGL3_MOUSE	136.67	19	19	19	52600000	47900000	5	5	5	8	Carbamidomethylation	24576	Cofilin-1 OS=Mus musculus OX=10090 GN=Cfl1 PE=1 SV=1
105	318	tr|Q8C2Q8|Q8C2Q8_MOUSE	135.76	19	19	19	33800000	42000000	5	5	7	7	Carbamidomethylation	30256	ATP synthase subunit gamma OS=Mus musculus OX=10090 GN=Atp5c1 PE=1 SV=1
105	322	tr|A2AKU9|A2AKU9_MOUSE	135.76	18	18	18	33800000	42000000	5	5	7	7	Carbamidomethylation	32771	ATP synthase subunit gamma OS=Mus musculus OX=10090 GN=Atp5c1 PE=1 SV=1
105	323	Q91VR2|ATPG_MOUSE	135.76	17	17	17	33800000	42000000	5	5	7	7	Carbamidomethylation	32886	ATP synthase subunit gamma mitochondrial OS=Mus musculus OX=10090 GN=Atp5f1c PE=1 SV=1
215	280	tr|B1AQW2|B1AQW2_MOUSE	134.76	17	15	17	10000000	8120000	5	5	4	5	Deamidation N	40892	Microtubule-associated protein OS=Mus musculus OX=10090 GN=Mapt PE=1 SV=1
320	338	tr|E9Q197|E9Q197_MOUSE	132.72	22	22	9	1550000	2210000	5	5	5	2	Carbamidomethylation	31207	Glyoxalase domain-containing protein 4 OS=Mus musculus OX=10090 GN=Glod4 PE=1 SV=1
320	339	Q9CPV4|GLOD4_MOUSE	132.72	20	20	8	1550000	2210000	5	5	5	2	Carbamidomethylation	33317	Glyoxalase domain-containing protein 4 OS=Mus musculus OX=10090 GN=Glod4 PE=1 SV=1
99	154	P08553|NFM_MOUSE	129.97	9	6	9	3730000	2470000	8	5	8	8		95916	Neurofilament medium polypeptide OS=Mus musculus OX=10090 GN=Nefm PE=1 SV=4
262	300	Q9QYC0|ADDA_MOUSE	128.73	9	7	7	4170000	2360000	5	5	4	4		80647	Alpha-adducin OS=Mus musculus OX=10090 GN=Add1 PE=1 SV=2
197	365	Q61171|PRDX2_MOUSE	128.68	27	27	27	32900000	31400000	5	5	6	6		21779	Peroxiredoxin-2 OS=Mus musculus OX=10090 GN=Prdx2 PE=1 SV=3
260	282	tr|Q91VA7|Q91VA7_MOUSE	128.08	14	8	14	16500000	8930000	5	5	3	5		42195	Isocitrate dehydrogenase [NAD] subunit mitochondrial OS=Mus musculus OX=10090 GN=Idh3b PE=1 SV=1
265	366	tr|A2AFW6|A2AFW6_MOUSE	126.27	18	18	15	8460000	8410000	5	5	5	4	Carbamidomethylation	32345	Mitochondrial carrier homolog 2 OS=Mus musculus OX=10090 GN=Mtch2 PE=1 SV=1
265	367	Q791V5|MTCH2_MOUSE	126.27	17	17	15	8460000	8410000	5	5	5	4	Carbamidomethylation	33499	Mitochondrial carrier homolog 2 OS=Mus musculus OX=10090 GN=Mtch2 PE=1 SV=1
265	368	tr|Q9D050|Q9D050_MOUSE	126.27	17	17	14	8460000	8410000	5	5	5	4	Carbamidomethylation	34554	Mitochondrial carrier homolog 2 OS=Mus musculus OX=10090 GN=Mtch2 PE=1 SV=1
243	353	tr|F6QYF8|F6QYF8_MOUSE	125.67	6	6	6	6690000	6820000	5	5	5	5		98529	Aminopeptidase (Fragment) OS=Mus musculus OX=10090 GN=Npepps PE=1 SV=1
243	354	tr|E9Q039|E9Q039_MOUSE	125.67	6	6	6	6690000	6820000	5	5	5	5		100128	Aminopeptidase OS=Mus musculus OX=10090 GN=Npepps PE=1 SV=1
243	355	Q11011|PSA_MOUSE	125.67	6	6	6	6690000	6820000	5	5	5	5		103325	Puromycin-sensitive aminopeptidase OS=Mus musculus OX=10090 GN=Npepps PE=1 SV=2
264	342	Q60829|PPR1B_MOUSE	120.57	38	38	14	399000	4770000	5	5	5	2	Carbamidomethylation	21781	Protein phosphatase 1 regulatory subunit 1B OS=Mus musculus OX=10090 GN=Ppp1r1b PE=1 SV=2
193	306	Q7TSJ2|MAP6_MOUSE	117.88	6	6	5	5020000	7680000	5	5	5	4		96450	Microtubule-associated protein 6 OS=Mus musculus OX=10090 GN=Map6 PE=1 SV=2
368	361	tr|A0A0G2JEU1|A0A0G2JEU1_MOUSE	115.86	14	8	8	1810000	2360000	5	5	3	3	Carbamidomethylation	51350	Aldehyde dehydrogenase mitochondrial OS=Mus musculus OX=10090 GN=Aldh2 PE=1 SV=1
368	362	P47738|ALDH2_MOUSE	115.86	12	7	8	1810000	2360000	5	5	3	3	Carbamidomethylation	56538	Aldehyde dehydrogenase mitochondrial OS=Mus musculus OX=10090 GN=Aldh2 PE=1 SV=1
282	320	P42932|TCPQ_MOUSE	115.73	11	4	9	4480000	1230000	5	5	2	4	Carbamidomethylation	59556	T-complex protein 1 subunit theta OS=Mus musculus OX=10090 GN=Cct8 PE=1 SV=3
131	185	tr|Q5SW88|Q5SW88_MOUSE	115.7	37	27	37	8490000	4820000	7	5	7	9		22372	RAB1A member RAS oncogene family OS=Mus musculus OX=10090 GN=Rab1a PE=1 SV=1
131	186	P62821|RAB1A_MOUSE	115.7	37	27	37	8490000	4820000	7	5	7	9		22678	Ras-related protein Rab-1A OS=Mus musculus OX=10090 GN=Rab1A PE=1 SV=3
139	203	P46660|AINX_MOUSE	115.56	13	11	12	7450000	6370000	8	5	8	7		55383	Alpha-internexin OS=Mus musculus OX=10090 GN=Ina PE=1 SV=3
244	360	P10852|4F2_MOUSE	113.93	11	9	11	6800000	5890000	5	5	4	5		58337	4F2 cell-surface antigen heavy chain OS=Mus musculus OX=10090 GN=Slc3a2 PE=1 SV=1
285	391	Q9JIS5|SV2A_MOUSE	113.69	6	3	6	9330000	7410000	5	5	2	5	Carbamidomethylation; Deamidation N	82647	Synaptic vesicle glycoprotein 2A OS=Mus musculus OX=10090 GN=Sv2a PE=1 SV=1
283	350	Q9D8E6|RL4_MOUSE	113.58	15	15	8	3690000	2740000	5	5	5	3		47154	60S ribosomal protein L4 OS=Mus musculus OX=10090 GN=Rpl4 PE=1 SV=3
173	206	tr|Q68FG2|Q68FG2_MOUSE	113.02	3	3	2	2510000	8710000	6	5	6	6	Carbamidomethylation	270921	Spectrin beta chain OS=Mus musculus OX=10090 GN=Sptbn2 PE=1 SV=1
241	326	Q8CAQ8|MIC60_MOUSE	109.61	7	4	7	4310000	3880000	5	5	4	5		83900	MICOS complex subunit Mic60 OS=Mus musculus OX=10090 GN=Immt PE=1 SV=1
239	305	P58252|EF2_MOUSE	104.79	6	5	6	9400000	7390000	5	5	4	5	Carbamidomethylation	95314	Elongation factor 2 OS=Mus musculus OX=10090 GN=Eef2 PE=1 SV=2
261	288	tr|D3YXT0|D3YXT0_MOUSE	102.49	12	4	12	11700000	8100000	5	5	2	5	Carbamidomethylation	49573	NADH dehydrogenase [ubiquinone] iron-sulfur protein 2 mitochondrial OS=Mus musculus OX=10090 GN=Ndufs2 PE=1 SV=1
261	289	Q91WD5|NDUS2_MOUSE	102.49	11	4	11	11700000	8100000	5	5	2	5	Carbamidomethylation	52626	NADH dehydrogenase [ubiquinone] iron-sulfur protein 2 mitochondrial OS=Mus musculus OX=10090 GN=Ndufs2 PE=1 SV=1
321	388	Q9D2G2|ODO2_MOUSE	100.93	10	9	7	14200000	16500000	5	5	4	3		48995	Dihydrolipoyllysine-residue succinyltransferase component of 2-oxoglutarate dehydrogenase complex mitochondrial OS=Mus musculus OX=10090 GN=Dlst PE=1 SV=1
266	393	tr|B1AXW5|B1AXW5_MOUSE	93.9	25	21	21	9410000	11000000	5	5	4	4		18870	Peroxiredoxin-1 (Fragment) OS=Mus musculus OX=10090 GN=Prdx1 PE=1 SV=8
266	394	tr|B1AXW6|B1AXW6_MOUSE	93.9	24	20	20	9410000	11000000	5	5	4	4		19483	Peroxiredoxin-1 (Fragment) OS=Mus musculus OX=10090 GN=Prdx1 PE=1 SV=1
266	395	P35700|PRDX1_MOUSE	93.9	22	18	18	9410000	11000000	5	5	4	4		22176	Peroxiredoxin-1 OS=Mus musculus OX=10090 GN=Prdx1 PE=1 SV=1
191	283	Q9CR62|M2OM_MOUSE	86.06	14	14	8	6680000	11900000	5	5	6	4	Deamidation N	34155	Mitochondrial 2-oxoglutarate/malate carrier protein OS=Mus musculus OX=10090 GN=Slc25a11 PE=1 SV=3
10	26	Q9D6F9|TBB4A_MOUSE	258.74	50	43	43	47700000	52800000	25	4	48	49	Carbamidomethylation; Deamidation N; Oxidation (M); HexNac	49586	Tubulin beta-4A chain OS=Mus musculus OX=10090 GN=Tubb4a PE=1 SV=3
22	56	P60710|ACTB_MOUSE	208.93	44	40	36	353000000	291000000	16	4	32	35	Carbamidomethylation; Deamidation N; Oxidation (M); Ubiquitination-K; HLys-Hex	41737	Actin cytoplasmic 1 OS=Mus musculus OX=10090 GN=Actb PE=1 SV=1
22	55	P63260|ACTG_MOUSE	208.93	44	40	36	353000000	291000000	16	4	32	35	Carbamidomethylation; Deamidation N; Oxidation (M); Ubiquitination-K; HLys-Hex	41793	Actin cytoplasmic 2 OS=Mus musculus OX=10090 GN=Actg1 PE=1 SV=1
21	83	P02089|HBB2_MOUSE	193.59	76	76	67	109000000	133000000	12	4	36	32	Carbamidomethylation	15878	Hemoglobin subunit beta-2 OS=Mus musculus OX=10090 GN=Hbb-b2 PE=1 SV=2
125	216	P17183|ENOG_MOUSE	174.11	18	18	17	42200000	39200000	6	4	8	8	Carbamidomethylation	47297	Gamma-enolase OS=Mus musculus OX=10090 GN=Eno2 PE=1 SV=2
112	127	tr|Q3UHH0|Q3UHH0_MOUSE	172.33	7	7	6	6320000	57500000	9	4	8	8		132106	Calcium-transporting ATPase OS=Mus musculus OX=10090 GN=Atp2b2 PE=1 SV=1
112	128	Q9R0K7|AT2B2_MOUSE	172.33	7	7	6	6320000	57500000	9	4	8	8		132587	Plasma membrane calcium-transporting ATPase 2 OS=Mus musculus OX=10090 GN=Atp2b2 PE=1 SV=2
112	129	tr|F8WHB1|F8WHB1_MOUSE	172.33	7	7	6	6320000	57500000	9	4	8	8		136783	Calcium-transporting ATPase OS=Mus musculus OX=10090 GN=Atp2b2 PE=1 SV=1
63	73	Q9DBG3|AP2B1_MOUSE	168.68	12	12	12	15900000	11700000	13	4	14	13	Carbamidomethylation	104583	AP-2 complex subunit beta OS=Mus musculus OX=10090 GN=Ap2b1 PE=1 SV=1
118	105	P63328|PP2BA_MOUSE	160.02	19	19	16	30400000	28700000	9	4	9	8		58644	Serine/threonine-protein phosphatase 2B catalytic subunit alpha isoform OS=Mus musculus OX=10090 GN=Ppp3ca PE=1 SV=1
65	140	P68510|1433F_MOUSE	159.02	32	32	32	24300000	13900000	8	4	15	14	Carbamidomethylation	28212	14-3-3 protein eta OS=Mus musculus OX=10090 GN=Ywhah PE=1 SV=2
164	450	tr|A0A1L1SUX8|A0A1L1SUX8_MOUSE	153.81	41	41	41	121000000	99200000	4	4	7	7	Carbamidomethylation	14038	Thy-1 membrane glycoprotein (Fragment) OS=Mus musculus OX=10090 GN=Thy1 PE=1 SV=1
164	451	P01831|THY1_MOUSE	153.81	31	31	31	121000000	99200000	4	4	7	7	Carbamidomethylation	18080	Thy-1 membrane glycoprotein OS=Mus musculus OX=10090 GN=Thy1 PE=1 SV=1
218	321	Q64332|SYN2_MOUSE	149.4	9	7	9	30800000	13800000	5	4	5	5		63373	Synapsin-2 OS=Mus musculus OX=10090 GN=Syn2 PE=1 SV=2
288	455	P08228|SODC_MOUSE	137.99	31	31	31	63600000	27200000	4	4	4	4	Carbamidomethylation	15943	Superoxide dismutase [Cu-Zn] OS=Mus musculus OX=10090 GN=Sod1 PE=1 SV=2
369	481	Q9DBJ1|PGAM1_MOUSE	132.59	20	20	12	2050000	19600000	4	4	4	2	Carbamidomethylation	28832	Phosphoglycerate mutase 1 OS=Mus musculus OX=10090 GN=Pgam1 PE=1 SV=3
354	949	P26350|PTMA_MOUSE	131.58	23	22	23	1750000	1240000	4	4	3	4	Deamidation N	12254	Prothymosin alpha OS=Mus musculus OX=10090 GN=Ptma PE=1 SV=2
142	265	Q8C8R3|ANK2_MOUSE	128.85	2	1	1	2390000	1640000	6	4	4	5		426265	Ankyrin-2 OS=Mus musculus OX=10090 GN=Ank2 PE=1 SV=2
142	266	tr|S4R2F3|S4R2F3_MOUSE	128.85	2	1	1	2390000	1640000	6	4	4	5		429112	Ankyrin-2 OS=Mus musculus OX=10090 GN=Ank2 PE=1 SV=3
377	572	Q8VEK3|HNRPU_MOUSE	128.47	6	3	5	422000	6120000	4	4	3	3	Carbamidomethylation	87918	Heterogeneous nuclear ribonucleoprotein U OS=Mus musculus OX=10090 GN=Hnrnpu PE=1 SV=1
291	478	P62962|PROF1_MOUSE	126.65	36	30	24	7500000	6210000	4	4	4	4	Deamidation N	14957	Profilin-1 OS=Mus musculus OX=10090 GN=Pfn1 PE=1 SV=2
147	540	P19783|COX41_MOUSE	122.65	22	22	22	48100000	41100000	5	4	7	6		19530	Cytochrome c oxidase subunit 4 isoform 1 mitochondrial OS=Mus musculus OX=10090 GN=Cox4i1 PE=1 SV=2
205	719	P62897|CYC_MOUSE	120.38	32	31	32	77500000	71300000	4	4	6	6		11605	Cytochrome c somatic OS=Mus musculus OX=10090 GN=Cycs PE=1 SV=2
290	466	tr|A0A0N4SVQ1|A0A0N4SVQ1_MOUSE	119.6	80	59	80	29900000	28900000	4	4	4	4		5877	Cytochrome c oxidase subunit NDUFA4 OS=Mus musculus OX=10090 GN=Ndufa4 PE=1 SV=1
290	476	Q62425|NDUA4_MOUSE	119.6	48	35	48	29900000	28900000	4	4	4	4		9327	Cytochrome c oxidase subunit NDUFA4 OS=Mus musculus OX=10090 GN=Ndufa4 PE=1 SV=2
263	319	O08539|BIN1_MOUSE	119.05	10	9	8	4900000	2420000	5	4	4	4		64470	Myc box-dependent-interacting protein 1 OS=Mus musculus OX=10090 GN=Bin1 PE=1 SV=1
292	498	tr|G3UX26|G3UX26_MOUSE	117.6	16	9	16	20200000	13600000	4	4	3	5	Deamidation N	30446	Voltage-dependent anion-selective channel protein 2 OS=Mus musculus OX=10090 GN=Vdac2 PE=1 SV=1
292	499	Q60930|VDAC2_MOUSE	117.6	16	9	16	20200000	13600000	4	4	3	5	Deamidation N	31733	Voltage-dependent anion-selective channel protein 2 OS=Mus musculus OX=10090 GN=Vdac2 PE=1 SV=2
249	449	tr|B2RXS8|B2RXS8_MOUSE	117.45	3	3	3	10600000	27800000	4	4	4	3		164357	Ptprz1 protein OS=Mus musculus OX=10090 GN=Ptprz1 PE=1 SV=1
249	479	B9EKR1|PTPRZ_MOUSE	117.45	2	2	2	10600000	27800000	4	4	4	3		254403	Receptor-type tyrosine-protein phosphatase zeta OS=Mus musculus OX=10090 GN=Ptprz1 PE=1 SV=1
293	501	tr|A0A0G2JGC1|A0A0G2JGC1_MOUSE	117.4	14	14	8	1310000	5200000	5	4	5	3	Carbamidomethylation	31367	Serine/threonine-protein phosphatase OS=Mus musculus OX=10090 GN=Ppp1cc PE=1 SV=1
293	502	tr|A0A0G2JFF1|A0A0G2JFF1_MOUSE	117.4	13	13	7	1310000	5200000	5	4	5	3	Carbamidomethylation	33320	Serine/threonine-protein phosphatase (Fragment) OS=Mus musculus OX=10090 GN=Ppp1cc PE=1 SV=1
293	503	P63087|PP1G_MOUSE	117.4	12	12	7	1310000	5200000	5	4	5	3	Carbamidomethylation	36984	Serine/threonine-protein phosphatase PP1-gamma catalytic subunit OS=Mus musculus OX=10090 GN=Ppp1cc PE=1 SV=1
227	548	P97807|FUMH_MOUSE	116.35	9	9	7	11600000	14200000	4	4	4	4		54357	Fumarate hydratase mitochondrial OS=Mus musculus OX=10090 GN=Fh PE=1 SV=3
219	351	P08113|ENPL_MOUSE	114.99	7	7	7	4280000	4410000	5	4	5	5		92476	Endoplasmin OS=Mus musculus OX=10090 GN=Hsp90b1 PE=1 SV=2
326	516	O35295|PURB_MOUSE	114.79	17	15	11	2610000	2060000	4	4	3	3		33901	Transcriptional activator protein Pur-beta OS=Mus musculus OX=10090 GN=Purb PE=1 SV=3
289	464	Q61885|MOG_MOUSE	113.65	17	12	17	22400000	17000000	4	4	4	4	Carbamidomethylation	28271	Myelin-oligodendrocyte glycoprotein OS=Mus musculus OX=10090 GN=Mog PE=1 SV=1
289	465	tr|Q3UY21|Q3UY21_MOUSE	113.65	17	12	17	22400000	17000000	4	4	4	4	Carbamidomethylation	28374	Myelin-oligodendrocyte glycoprotein OS=Mus musculus OX=10090 GN=Mog PE=1 SV=1
322	438	P40124|CAP1_MOUSE	110.72	11	11	4	3960000	6410000	4	4	4	2	Carbamidomethylation	51565	Adenylyl cyclase-associated protein 1 OS=Mus musculus OX=10090 GN=Cap1 PE=1 SV=4
370	510	Q8BFR5|EFTU_MOUSE	107.47	11	11	4	4320000	3730000	4	4	4	2	Carbamidomethylation	49508	Elongation factor Tu mitochondrial OS=Mus musculus OX=10090 GN=Tufm PE=1 SV=1
221	433	P19246|NFH_MOUSE	107.33	5	3	5	2310000	524000	5	4	3	5	Carbamidomethylation; Phosphoserine (pS)	116994	Neurofilament heavy polypeptide OS=Mus musculus OX=10090 GN=Nefh PE=1 SV=3
328	527	tr|K4DI76|K4DI76_MOUSE	106.94	4	2	4	3640000	3060000	4	4	3	4		153057	Calcium-dependent secretion activator 1 OS=Mus musculus OX=10090 GN=Cadps PE=1 SV=1
328	528	Q80TJ1|CAPS1_MOUSE	106.94	4	2	4	3640000	3060000	4	4	3	4		153112	Calcium-dependent secretion activator 1 OS=Mus musculus OX=10090 GN=Cadps PE=1 SV=3
328	529	tr|J3QJW3|J3QJW3_MOUSE	106.94	4	2	4	3640000	3060000	4	4	3	4		153229	Calcium-dependent secretion activator 1 OS=Mus musculus OX=10090 GN=Cadps PE=1 SV=1
298	538	D3Z7P3|GLSK_MOUSE	105.78	7	7	5	4250000	4210000	4	4	4	3	Carbamidomethylation	73964	Glutaminase kidney isoform mitochondrial OS=Mus musculus OX=10090 GN=Gls PE=1 SV=1
225	535	P35486|ODPA_MOUSE	105.25	10	8	10	14500000	12800000	4	4	5	6	Carbamidomethylation	43232	Pyruvate dehydrogenase E1 component subunit alpha somatic form mitochondrial OS=Mus musculus OX=10090 GN=Pdha1 PE=1 SV=1
203	583	Q99P72|RTN4_MOUSE	105.25	3	3	3	20400000	20900000	4	4	5	4		126613	Reticulon-4 OS=Mus musculus OX=10090 GN=Rtn4 PE=1 SV=2
300	663	Q9QYG0|NDRG2_MOUSE	105	15	15	9	13800000	12700000	4	4	4	3	Carbamidomethylation; Ubiquitination-K	40789	Protein NDRG2 OS=Mus musculus OX=10090 GN=Ndrg2 PE=1 SV=1
374	543	P48722|HS74L_MOUSE	104.99	5	3	4	4030000	1900000	4	4	3	3		94382	Heat shock 70 kDa protein 4L OS=Mus musculus OX=10090 GN=Hspa4l PE=1 SV=2
246	406	Q9WUA3|PFKAP_MOUSE	103.63	6	3	5	2990000	850000	5	4	2	4		85455	ATP-dependent 6-phosphofructokinase platelet type OS=Mus musculus OX=10090 GN=Pfkp PE=1 SV=1
246	405	tr|Q8C605|Q8C605_MOUSE	103.63	6	3	5	2990000	850000	5	4	2	4		85547	ATP-dependent 6-phosphofructokinase OS=Mus musculus OX=10090 GN=Pfkp PE=1 SV=1
270	573	P19157|GSTP1_MOUSE	102.46	14	14	7	11100000	13500000	4	4	4	2		23609	Glutathione S-transferase P 1 OS=Mus musculus OX=10090 GN=Gstp1 PE=1 SV=2
294	508	P60487|PLPP_MOUSE	102.44	15	15	15	4660000	4680000	4	4	4	4	Carbamidomethylation	31512	Pyridoxal phosphate phosphatase OS=Mus musculus OX=10090 GN=Pdxp PE=1 SV=1
324	490	tr|F7BNZ5|F7BNZ5_MOUSE	100	12	8	12	3750000	2730000	4	4	3	4		40546	Breast carcinoma-amplified sequence 1 homolog (Fragment) OS=Mus musculus OX=10090 GN=Bcas1 PE=1 SV=1
324	491	tr|A2AVX1|A2AVX1_MOUSE	100	8	6	8	3750000	2730000	4	4	3	4		61163	Breast carcinoma-amplified sequence 1 homolog OS=Mus musculus OX=10090 GN=Bcas1 PE=1 SV=1
324	492	tr|E9Q8Q5|E9Q8Q5_MOUSE	100	8	5	8	3750000	2730000	4	4	3	4		62253	Breast carcinoma-amplified sequence 1 homolog OS=Mus musculus OX=10090 GN=Bcas1 PE=1 SV=1
324	493	Q80YN3|BCAS1_MOUSE	100	7	5	7	3750000	2730000	4	4	3	4		67378	Breast carcinoma-amplified sequence 1 homolog OS=Mus musculus OX=10090 GN=Bcas1 PE=1 SV=3
200	412	Q9D051|ODPB_MOUSE	99.75	10	10	10	19300000	18100000	4	4	5	5	Carbamidomethylation	38937	Pyruvate dehydrogenase E1 component subunit beta mitochondrial OS=Mus musculus OX=10090 GN=Pdhb PE=1 SV=1
371	512	Q9JII6|AK1A1_MOUSE	99.3	14	14	6	4730000	6740000	4	4	4	2		36587	Aldo-keto reductase family 1 member A1 OS=Mus musculus OX=10090 GN=Akr1a1 PE=1 SV=3
330	546	O35136|NCAM2_MOUSE	96.74	5	4	4	2390000	1410000	4	4	3	3	Carbamidomethylation	93204	Neural cell adhesion molecule 2 OS=Mus musculus OX=10090 GN=Ncam2 PE=1 SV=1
323	441	P42669|PURA_MOUSE	96.3	10	7	8	7850000	4860000	4	4	3	3	Carbamidomethylation	34884	Transcriptional activator protein Pur-alpha OS=Mus musculus OX=10090 GN=Pura PE=1 SV=1
192	298	P10649|GSTM1_MOUSE	94.83	24	16	20	25400000	22500000	5	4	4	4	Carbamidomethylation	25970	Glutathione S-transferase Mu 1 OS=Mus musculus OX=10090 GN=Gstm1 PE=1 SV=2
192	299	tr|A2AE89|A2AE89_MOUSE	94.83	21	14	18	25400000	22500000	5	4	4	4	Carbamidomethylation	28556	Glutathione S-transferase Mu 1 OS=Mus musculus OX=10090 GN=Gstm1 PE=1 SV=2
189	272	tr|Z4YJV4|Z4YJV4_MOUSE	94.22	7	6	4	428000	2250000	8	4	7	4	Carbamidomethylation	116027	2-oxoglutarate dehydrogenase mitochondrial OS=Mus musculus OX=10090 GN=Ogdh PE=1 SV=1
189	273	Q60597|ODO1_MOUSE	94.22	7	6	4	428000	2250000	8	4	7	4	Carbamidomethylation	116449	2-oxoglutarate dehydrogenase mitochondrial OS=Mus musculus OX=10090 GN=Ogdh PE=1 SV=3
332	560	P28660|NCKP1_MOUSE	91.78	4	4	2	4300000	3730000	4	4	4	2		128784	Nck-associated protein 1 OS=Mus musculus OX=10090 GN=Nckap1 PE=1 SV=2
332	561	tr|A2AS98|A2AS98_MOUSE	91.78	4	4	1	4300000	3730000	4	4	4	2		129511	Nck-associated protein 1 OS=Mus musculus OX=10090 GN=Nckap1 PE=1 SV=1
238	290	Q3ULJ0|GPD1L_MOUSE	91.62	17	12	14	1780000	2970000	6	4	5	5	Carbamidomethylation	38226	Glycerol-3-phosphate dehydrogenase 1-like protein OS=Mus musculus OX=10090 GN=Gpd1l PE=1 SV=2
268	445	tr|Q8BTU6|Q8BTU6_MOUSE	91.25	11	11	7	6880000	7940000	4	4	4	3		41290	Eukaryotic initiation factor 4A-II OS=Mus musculus OX=10090 GN=Eif4a2 PE=1 SV=1
268	446	P10630|IF4A2_MOUSE	91.25	10	10	6	6880000	7940000	4	4	4	3		46402	Eukaryotic initiation factor 4A-II OS=Mus musculus OX=10090 GN=Eif4a2 PE=1 SV=2
287	440	tr|A0A1D5RM85|A0A1D5RM85_MOUSE	90.99	18	18	12	2260000	2630000	4	4	4	3	Carbamidomethylation	24638	60S ribosomal protein L18a (Fragment) OS=Mus musculus OX=10090 GN=Rpl18a PE=1 SV=1
329	530	Q99JY9|ARP3_MOUSE	90.12	13	10	13	3170000	848000	4	4	3	4	Carbamidomethylation; Deamidation N	47357	Actin-related protein 3 OS=Mus musculus OX=10090 GN=Actr3 PE=1 SV=3
430	567	P45376|ALDR_MOUSE	89.41	12	12	2	1800000	3320000	4	4	4	1		35732	Aldo-keto reductase family 1 member B1 OS=Mus musculus OX=10090 GN=Akr1b1 PE=1 SV=3
299	539	Q9CQQ7|AT5F1_MOUSE	88.66	14	14	11	36800000	40200000	4	4	4	4		28949	ATP synthase F(0) complex subunit B1 mitochondrial OS=Mus musculus OX=10090 GN=Atp5pb PE=1 SV=1
106	402	Q61699|HS105_MOUSE	87.9	5	3	5	381000000	328000000	4	4	6	7	Deamidation N	96407	Heat shock protein 105 kDa OS=Mus musculus OX=10090 GN=Hsph1 PE=1 SV=2
373	536	P58281|OPA1_MOUSE	86.36	4	4	2	1720000	4880000	4	4	4	2		111339	Dynamin-like 120 kDa protein mitochondrial OS=Mus musculus OX=10090 GN=Opa1 PE=1 SV=1
373	537	tr|H7BX01|H7BX01_MOUSE	86.36	4	4	2	1720000	4880000	4	4	4	2		113230	Dynamin-like 120 kDa protein mitochondrial OS=Mus musculus OX=10090 GN=Opa1 PE=1 SV=1
331	554	Q64521|GPDM_MOUSE	79.17	6	4	6	1830000	1570000	4	4	3	4		80954	Glycerol-3-phosphate dehydrogenase mitochondrial OS=Mus musculus OX=10090 GN=Gpd2 PE=1 SV=2
331	555	tr|A2AQR0|A2AQR0_MOUSE	79.17	6	4	6	1830000	1570000	4	4	3	4		82830	Glycerol-3-phosphate dehydrogenase OS=Mus musculus OX=10090 GN=Gpd2 PE=1 SV=1
308	757	tr|B1AWE0|B1AWE0_MOUSE	75.98	12	12	12	5760000	4530000	4	4	4	4		23479	Clathrin light chain OS=Mus musculus OX=10090 GN=Clta PE=1 SV=1
308	758	tr|Q6PFA2|Q6PFA2_MOUSE	75.98	12	12	12	5760000	4530000	4	4	4	4		23633	Clathrin light chain OS=Mus musculus OX=10090 GN=Clta PE=1 SV=1
308	759	tr|B1AWE1|B1AWE1_MOUSE	75.98	12	12	12	5760000	4530000	4	4	4	4		24964	Clathrin light chain OS=Mus musculus OX=10090 GN=Clta PE=1 SV=1
308	761	O08585|CLCA_MOUSE	75.98	11	11	11	5760000	4530000	4	4	4	4		25604	Clathrin light chain A OS=Mus musculus OX=10090 GN=Clta PE=1 SV=2
308	762	tr|B1AWD8|B1AWD8_MOUSE	75.98	11	11	11	5760000	4530000	4	4	4	4		25661	Clathrin light chain OS=Mus musculus OX=10090 GN=Clta PE=1 SV=1
308	763	tr|B1AWD9|B1AWD9_MOUSE	75.98	11	11	11	5760000	4530000	4	4	4	4		27062	Clathrin light chain OS=Mus musculus OX=10090 GN=Clta PE=1 SV=1
301	556	Q922Q1|MARC2_MOUSE	64.94	9	9	6	1630000	1940000	4	4	4	3	Carbamidomethylation	38194	Mitochondrial amidoxime reducing component 2 OS=Mus musculus OX=10090 GN=Marc2 PE=1 SV=1
11	34	P68368|TBA4A_MOUSE	236.55	44	44	43	68700000	65000000	19	3	48	45	Carbamidomethylation; Deamidation N; Ubiquitination-K	49924	Tubulin alpha-4A chain OS=Mus musculus OX=10090 GN=Tuba4a PE=1 SV=1
11	35	tr|A0A0A0MQA5|A0A0A0MQA5_MOUSE	236.55	41	41	41	68700000	65000000	19	3	48	45	Carbamidomethylation; Deamidation N; Ubiquitination-K	52912	Tubulin alpha chain (Fragment) OS=Mus musculus OX=10090 GN=Tuba4a PE=1 SV=1
13	50	P16858|G3P_MOUSE	227.64	47	39	47	50900000	88200000	19	3	35	41	Carbamidomethylation; Deamidation N; Oxidation (M)	35810	Glyceraldehyde-3-phosphate dehydrogenase OS=Mus musculus OX=10090 GN=Gapdh PE=1 SV=2
13	51	tr|A0A0A0MQF6|A0A0A0MQF6_MOUSE	227.64	43	36	43	50900000	88200000	19	3	35	41	Carbamidomethylation; Deamidation N; Oxidation (M)	38653	Glyceraldehyde-3-phosphate dehydrogenase OS=Mus musculus OX=10090 GN=Gapdh PE=1 SV=1
135	126	P97427|DPYL1_MOUSE	169.26	17	10	14	6400000		8	3	6	8	Deamidation N	62168	Dihydropyrimidinase-related protein 1 OS=Mus musculus OX=10090 GN=Crmp1 PE=1 SV=1
121	160	G5E829|AT2B1_MOUSE	159.93	6	6	6	12900000	11800000	8	3	7	8	Carbamidomethylation	134747	Plasma membrane calcium-transporting ATPase 1 OS=Mus musculus OX=10090 GN=Atp2b1 PE=1 SV=1
113	213	P62880|GBB2_MOUSE	158.64	23	19	23	14800000	9600000	6	3	8	9	Carbamidomethylation	37331	Guanine nucleotide-binding protein G(I)/G(S)/G(T) subunit beta-2 OS=Mus musculus OX=10090 GN=Gnb2 PE=1 SV=3
113	214	tr|E9QKR0|E9QKR0_MOUSE	158.64	20	17	20	14800000	9600000	6	3	8	9	Carbamidomethylation	41409	Guanine nucleotide-binding protein G(I)/G(S)/G(T) subunit beta-2 OS=Mus musculus OX=10090 GN=Gnb2 PE=1 SV=1
81	121	P62631|EF1A2_MOUSE	157.36	21	21	15	10500000	17500000	9	3	11	10		50454	Elongation factor 1-alpha 2 OS=Mus musculus OX=10090 GN=Eef1a2 PE=1 SV=1
70	183	Q9CQV8|1433B_MOUSE	157.25	28	28	28	37000000	33900000	7	3	15	13		28086	14-3-3 protein beta/alpha OS=Mus musculus OX=10090 GN=Ywhab PE=1 SV=3
172	190	tr|Q3TT92|Q3TT92_MOUSE	150.09	13	11	8	8380000	2200000	7	3	6	5	Carbamidomethylation	61780	Dihydropyrimidinase-related protein 3 OS=Mus musculus OX=10090 GN=Dpysl3 PE=1 SV=1
172	191	Q62188|DPYL3_MOUSE	150.09	13	11	8	8380000	2200000	7	3	6	5	Carbamidomethylation	61936	Dihydropyrimidinase-related protein 3 OS=Mus musculus OX=10090 GN=Dpysl3 PE=1 SV=1
172	195	tr|E9PWE8|E9PWE8_MOUSE	150.09	11	9	6	8380000	2200000	7	3	6	5	Carbamidomethylation	73884	Dihydropyrimidinase-related protein 3 OS=Mus musculus OX=10090 GN=Dpysl3 PE=1 SV=1
242	332	P08752|GNAI2_MOUSE	141.41	17	17	10	1490000	4590000	5	3	6	4	Carbamidomethylation	40489	Guanine nucleotide-binding protein G(i) subunit alpha-2 OS=Mus musculus OX=10090 GN=Gnai2 PE=1 SV=5
202	461	P53994|RAB2A_MOUSE	131.74	24	24	24	5690000	6800000	4	3	5	5		23548	Ras-related protein Rab-2A OS=Mus musculus OX=10090 GN=Rab2a PE=1 SV=1
441	727	P09671|SODM_MOUSE	128.96	17	10	17	5340000	1590000	3	3	2	3		24603	Superoxide dismutase [Mn] mitochondrial OS=Mus musculus OX=10090 GN=Sod2 PE=1 SV=3
220	348	P60766|CDC42_MOUSE	117.62	27	27	23	3000000	5000000	5	3	5	5	Carbamidomethylation	21259	Cell division control protein 42 homolog OS=Mus musculus OX=10090 GN=Cdc42 PE=1 SV=2
141	258	Q61598|GDIB_MOUSE	117.1	15	11	13	5040000	5930000	7	3	7	7	Carbamidomethylation; Deamidation N	50537	Rab GDP dissociation inhibitor beta OS=Mus musculus OX=10090 GN=Gdi2 PE=1 SV=1
432	610	Q62420|SH3G2_MOUSE	113.31	11	7	11	8360000	6990000	3	3	2	3		39955	Endophilin-A1 OS=Mus musculus OX=10090 GN=Sh3gl2 PE=1 SV=2
432	611	tr|A2ALV3|A2ALV3_MOUSE	113.31	9	6	9	8360000	6990000	3	3	2	3		48296	Endophilin-A1 OS=Mus musculus OX=10090 GN=Sh3gl2 PE=1 SV=1
388	713	P14231|AT1B2_MOUSE	112.43	11	11	11	18600000	16700000	3	3	3	3	Carbamidomethylation; Deamidation N	33344	Sodium/potassium-transporting ATPase subunit beta-2 OS=Mus musculus OX=10090 GN=Atp1b2 PE=1 SV=2
306	619	Q91V12|BACH_MOUSE	110.31	10	10	10	6510000	6780000	3	3	4	4		42537	Cytosolic acyl coenzyme A thioester hydrolase OS=Mus musculus OX=10090 GN=Acot7 PE=1 SV=2
306	620	tr|E9PYH2|E9PYH2_MOUSE	110.31	10	10	10	6510000	6780000	3	3	4	4		42826	Cytosolic acyl coenzyme A thioester hydrolase OS=Mus musculus OX=10090 GN=Acot7 PE=1 SV=1
166	496	O88569|ROA2_MOUSE	109.7	12	12	12	5400000	4850000	4	3	6	7	Deamidation N	37403	Heterogeneous nuclear ribonucleoproteins A2/B1 OS=Mus musculus OX=10090 GN=Hnrnpa2b1 PE=1 SV=2
392	768	P62715|PP2AB_MOUSE	107.91	10	10	6	2980000	3180000	3	3	3	2	Carbamidomethylation	35575	Serine/threonine-protein phosphatase 2A catalytic subunit beta isoform OS=Mus musculus OX=10090 GN=Ppp2cb PE=1 SV=1
336	590	Q9DCJ5|NDUA8_MOUSE	107.01	22	22	22	2200000	3120000	3	3	3	3	Carbamidomethylation; Deamidation N	19992	NADH dehydrogenase [ubiquinone] 1 alpha subcomplex subunit 8 OS=Mus musculus OX=10090 GN=Ndufa8 PE=1 SV=3
391	765	Q9WTX5|SKP1_MOUSE	106.57	24	24	15	1290000	1120000	3	3	3	2		18672	S-phase kinase-associated protein 1 OS=Mus musculus OX=10090 GN=Skp1 PE=1 SV=3
334	566	Q9R111|GUAD_MOUSE	106.29	7	7	7	5050000	5290000	3	3	3	3		51013	Guanine deaminase OS=Mus musculus OX=10090 GN=Gda PE=1 SV=1
305	614	E9PUL5|PRRT2_MOUSE	105.76	10	10	10	2930000	2580000	3	3	4	4		35924	Proline-rich transmembrane protein 2 OS=Mus musculus OX=10090 GN=Prrt2 PE=1 SV=1
383	655	Q9D3D9|ATPD_MOUSE	105.04	23	23	23	15900000	12600000	3	3	3	3		17600	ATP synthase subunit delta mitochondrial OS=Mus musculus OX=10090 GN=Atp5f1d PE=1 SV=1
440	725	tr|A0A0A0MQM0|A0A0A0MQM0_MOUSE	101.77	21	21	13	1310000	1450000	3	3	3	2		16303	Eukaryotic translation initiation factor 5A (Fragment) OS=Mus musculus OX=10090 GN=Eif5a PE=1 SV=1
440	726	P63242|IF5A1_MOUSE	101.77	20	20	12	1310000	1450000	3	3	3	2		16832	Eukaryotic translation initiation factor 5A-1 OS=Mus musculus OX=10090 GN=Eif5a PE=1 SV=2
519	746	Q9D172|GAL3A_MOUSE	101.41	18	12	15	2210000	0	3	3	2	2	Carbamidomethylation; Deamidation N	28090	Glutamine amidotransferase-like class 1 domain-containing protein 3A mitochondrial OS=Mus musculus OX=10090 GN=Gatd3a PE=1 SV=1
439	718	Q9CPU0|LGUL_MOUSE	100.74	18	9	18	6780000	7070000	3	3	2	3	Carbamidomethylation	20810	Lactoylglutathione lyase OS=Mus musculus OX=10090 GN=Glo1 PE=1 SV=3
436	656	Q99LC3|NDUAA_MOUSE	100.24	9	6	9	3070000	1410000	3	3	2	3		40603	NADH dehydrogenase [ubiquinone] 1 alpha subcomplex subunit 10 mitochondrial OS=Mus musculus OX=10090 GN=Ndufa10 PE=1 SV=1
372	517	O88844|IDHC_MOUSE	99.54	10	7	7	5130000	1970000	4	3	3	3		46674	Isocitrate dehydrogenase [NADP] cytoplasmic OS=Mus musculus OX=10090 GN=Idh1 PE=1 SV=2
284	390	P50518|VATE1_MOUSE	99.52	21	21	14	346000	9090000	5	3	5	3		26157	V-type proton ATPase subunit E 1 OS=Mus musculus OX=10090 GN=Atp6v1e1 PE=1 SV=2
269	505	tr|Q8CCS7|Q8CCS7_MOUSE	98.89	17	17	13	3060000	2120000	4	3	5	4		28123	Calbindin 2 isoform CRA_a OS=Mus musculus OX=10090 GN=Calb2 PE=1 SV=1
269	506	Q08331|CALB2_MOUSE	98.89	15	15	12	3060000	2120000	4	3	5	4		31373	Calretinin OS=Mus musculus OX=10090 GN=Calb2 PE=1 SV=3
431	571	Q9CZC8|SCRN1_MOUSE	98.74	9	9	3	1630000	2160000	3	3	3	1	Carbamidomethylation	46326	Secernin-1 OS=Mus musculus OX=10090 GN=Scrn1 PE=1 SV=1
342	696	Q61301|CTNA2_MOUSE	96.83	3	3	3	95900	101000	3	3	3	3	Carbamidomethylation	105286	Catenin alpha-2 OS=Mus musculus OX=10090 GN=Ctnna2 PE=1 SV=3
342	697	tr|E0CXB9|E0CXB9_MOUSE	96.83	3	3	3	95900	101000	3	3	3	3	Carbamidomethylation	106730	Catenin alpha-2 OS=Mus musculus OX=10090 GN=Ctnna2 PE=1 SV=1
386	691	tr|D6RFB9|D6RFB9_MOUSE	95.49	13	13	9	3050000	2550000	3	3	3	2		29485	Syntaxin-1A OS=Mus musculus OX=10090 GN=Stx1a PE=1 SV=1
226	542	P08551|NFL_MOUSE	94.51	6	6	6	9340000	7920000	5	3	6	5	Carbamidomethylation	61509	Neurofilament light polypeptide OS=Mus musculus OX=10090 GN=Nefl PE=1 SV=5
327	522	P63085|MK01_MOUSE	93.44	12	12	8	5760000	7740000	4	3	4	3	Carbamidomethylation	41276	Mitogen-activated protein kinase 1 OS=Mus musculus OX=10090 GN=Mapk1 PE=1 SV=3
411	1081	Q9CQ69|QCR8_MOUSE	91.5	26	26	26	5610000	19700000	3	3	3	3		9768	Cytochrome b-c1 complex subunit 8 OS=Mus musculus OX=10090 GN=Uqcrq PE=1 SV=3
653	643	tr|Q8C5R8|Q8C5R8_MOUSE	91.19	12	4	8	1070000	0	3	3	1	2	Carbamidomethylation	34820	Phosphoribosyl pyrophosphate synthetase 1-like 1 OS=Mus musculus OX=10090 GN=Prps1l1 PE=1 SV=1
653	642	tr|G3UXL2|G3UXL2_MOUSE	91.19	12	4	8	1070000	0	3	3	1	2	Carbamidomethylation	34824	Phosphoribosyl pyrophosphate synthetase 1-like 3 OS=Mus musculus OX=10090 GN=Prps1l3 PE=3 SV=1
653	641	Q9D7G0|PRPS1_MOUSE	91.19	12	4	8	1070000	0	3	3	1	2	Carbamidomethylation	34834	Ribose-phosphate pyrophosphokinase 1 OS=Mus musculus OX=10090 GN=Prps1 PE=1 SV=4
339	662	O35129|PHB2_MOUSE	91.17	11	11	11	5290000	5550000	3	3	3	3		33296	Prohibitin-2 OS=Mus musculus OX=10090 GN=Phb2 PE=1 SV=1
338	603	tr|D3YWF6|D3YWF6_MOUSE	90.96	13	9	13	7860000	4700000	3	3	2	3		28037	Ubiquitin thioesterase OTUB1 OS=Mus musculus OX=10090 GN=Otub1 PE=1 SV=1
338	604	Q7TQI3|OTUB1_MOUSE	90.96	11	8	11	7860000	4700000	3	3	2	3		31270	Ubiquitin thioesterase OTUB1 OS=Mus musculus OX=10090 GN=Otub1 PE=1 SV=2
442	733	Q99LC5|ETFA_MOUSE	89.61	9	9	7	1980000	1520000	3	3	3	2	Carbamidomethylation	35009	Electron transfer flavoprotein subunit alpha mitochondrial OS=Mus musculus OX=10090 GN=Etfa PE=1 SV=2
443	738	P62746|RHOB_MOUSE	89.5	16	16	10	5080000	5320000	3	3	3	2	Carbamidomethylation	22123	Rho-related GTP-binding protein RhoB OS=Mus musculus OX=10090 GN=Rhob PE=1 SV=1
348	815	tr|G3UZM4|G3UZM4_MOUSE	88.98	7	7	7	5900000	5990000	3	3	3	3	Carbamidomethylation	47346	Cell adhesion molecule 2 (Fragment) OS=Mus musculus OX=10090 GN=Cadm2 PE=1 SV=1
348	814	Q8BLQ9|CADM2_MOUSE	88.98	7	7	7	5900000	5990000	3	3	3	3	Carbamidomethylation	47559	Cell adhesion molecule 2 OS=Mus musculus OX=10090 GN=Cadm2 PE=1 SV=2
516	674	tr|A0A1B0GS70|A0A1B0GS70_MOUSE	88.97	15	10	10	3050000	110000	3	3	2	2		26496	Proteasome endopeptidase complex OS=Mus musculus OX=10090 GN=Psma1 PE=1 SV=1
516	675	Q9R1P4|PSA1_MOUSE	88.97	14	9	9	3050000	110000	3	3	2	2		29547	Proteasome subunit alpha type-1 OS=Mus musculus OX=10090 GN=Psma1 PE=1 SV=1
453	820	Q00623|APOA1_MOUSE	87.21	11	11	5	2060000	2730000	3	3	3	1		30616	Apolipoprotein A-I OS=Mus musculus OX=10090 GN=Apoa1 PE=1 SV=2
379	596	tr|Q6P6I8|Q6P6I8_MOUSE	86.72	8	4	8	6210000	3310000	3	3	2	3	Carbamidomethylation; Deamidation N	55986	Signal-regulatory protein alpha OS=Mus musculus OX=10090 GN=Sirpa PE=1 SV=1
379	597	P97797|SHPS1_MOUSE	86.72	8	4	8	6210000	3310000	3	3	2	3	Carbamidomethylation; Deamidation N	56414	Tyrosine-protein phosphatase non-receptor type substrate 1 OS=Mus musculus OX=10090 GN=Sirpa PE=1 SV=2
296	523	tr|A0A2R8W6V9|A0A2R8W6V9_MOUSE	86.54	11	11	11	4720000	4820000	4	3	4	4		39159	Neuronal-specific septin-3 OS=Mus musculus OX=10090 GN=Sept3 PE=1 SV=1
296	524	Q9Z1S5|SEPT3_MOUSE	86.54	11	11	11	4720000	4820000	4	3	4	4		40038	Neuronal-specific septin-3 OS=Mus musculus OX=10090 GN=Sept3 PE=1 SV=2
393	771	tr|D3YUK4|D3YUK4_MOUSE	85.67	25	25	25	1480000	1750000	3	3	3	3	Carbamidomethylation; Deamidation N	17740	NADH dehydrogenase [ubiquinone] 1 beta subcomplex subunit 10 (Fragment) OS=Mus musculus OX=10090 GN=Ndufb10 PE=1 SV=1
393	775	Q9DCS9|NDUBA_MOUSE	85.67	21	21	21	1480000	1750000	3	3	3	3	Carbamidomethylation; Deamidation N	21024	NADH dehydrogenase [ubiquinone] 1 beta subcomplex subunit 10 OS=Mus musculus OX=10090 GN=Ndufb10 PE=1 SV=3
438	705	tr|E9PUD2|E9PUD2_MOUSE	85.45	5	5	3	2370000	2880000	3	3	3	2		79533	Dynamin-1-like protein OS=Mus musculus OX=10090 GN=Dnm1l PE=1 SV=1
438	706	Q8K1M6|DNM1L_MOUSE	85.45	4	4	3	2370000	2880000	3	3	3	2		82658	Dynamin-1-like protein OS=Mus musculus OX=10090 GN=Dnm1l PE=1 SV=2
522	785	Q8K596|NAC2_MOUSE	84.66	4	4	1	711000	1150000	3	3	3	1		100711	Sodium/calcium exchanger 2 OS=Mus musculus OX=10090 GN=Slc8a2 PE=1 SV=1
447	804	tr|Q3U0I3|Q3U0I3_MOUSE	82.86	6	4	6	3460000	2060000	3	3	2	3		58279	T-complex protein 1 subunit gamma OS=Mus musculus OX=10090 GN=Cct3 PE=1 SV=1
447	805	P80318|TCPG_MOUSE	82.86	6	4	6	3460000	2060000	3	3	2	3		60630	T-complex protein 1 subunit gamma OS=Mus musculus OX=10090 GN=Cct3 PE=1 SV=1
384	660	tr|Q924B0|Q924B0_MOUSE	82.73	11	11	11	4230000	4910000	3	3	3	3	Carbamidomethylation	30429	Inositol-1-monophosphatase OS=Mus musculus OX=10090 GN=Impa1 PE=1 SV=1
384	659	O55023|IMPA1_MOUSE	82.73	11	11	11	4230000	4910000	3	3	3	3	Carbamidomethylation	30436	Inositol monophosphatase 1 OS=Mus musculus OX=10090 GN=Impa1 PE=1 SV=1
387	699	P62908|RS3_MOUSE	82.62	12	12	12	4140000	2830000	3	3	3	3		26674	40S ribosomal protein S3 OS=Mus musculus OX=10090 GN=Rps3 PE=1 SV=1
344	740	tr|A0A2R8W6N3|A0A2R8W6N3_MOUSE	81.78	8	8	4	1310000	1350000	3	3	3	2	Deamidation N	63308	Oxidation resistance protein 1 OS=Mus musculus OX=10090 GN=Oxr1 PE=1 SV=1
344	741	tr|E9Q0A7|E9Q0A7_MOUSE	81.78	5	5	3	1310000	1350000	3	3	3	2	Deamidation N	91742	Oxidation resistance protein 1 OS=Mus musculus OX=10090 GN=Oxr1 PE=1 SV=1
344	742	Q4KMM3|OXR1_MOUSE	81.78	5	5	3	1310000	1350000	3	3	3	2	Deamidation N	95912	Oxidation resistance protein 1 OS=Mus musculus OX=10090 GN=Oxr1 PE=1 SV=3
297	531	tr|E0CXN5|E0CXN5_MOUSE	80.59	12	10	12	1920000	1860000	4	3	3	4	Carbamidomethylation	35231	Glycerol-3-phosphate dehydrogenase [NAD(+)] OS=Mus musculus OX=10090 GN=Gpd1 PE=1 SV=1
297	532	P13707|GPDA_MOUSE	80.59	11	9	11	1920000	1860000	4	3	3	4	Carbamidomethylation	37573	Glycerol-3-phosphate dehydrogenase [NAD(+)] cytoplasmic OS=Mus musculus OX=10090 GN=Gpd1 PE=1 SV=3
521	776	Q8BKZ9|ODPX_MOUSE	80.43	6	5	4	438000	840000	3	3	2	2		53999	Pyruvate dehydrogenase protein X component mitochondrial OS=Mus musculus OX=10090 GN=Pdhx PE=1 SV=1
517	686	Q9R1Q8|TAGL3_MOUSE	78.28	19	19	4	4230000	6440000	3	3	3	1		22471	Transgelin-3 OS=Mus musculus OX=10090 GN=Tagln3 PE=1 SV=1
518	743	tr|Q3TYE5|Q3TYE5_MOUSE	78.17	9	6	6	5420000	6110000	3	3	2	2	Deamidation N	37310	Limbic system-associated membrane protein OS=Mus musculus OX=10090 GN=Lsamp PE=1 SV=1
518	744	Q8BLK3|LSAMP_MOUSE	78.17	9	6	6	5420000	6110000	3	3	2	2	Deamidation N	38086	Limbic system-associated membrane protein OS=Mus musculus OX=10090 GN=Lsamp PE=1 SV=1
518	745	tr|A0A087WP80|A0A087WP80_MOUSE	78.17	9	6	6	5420000	6110000	3	3	2	2	Deamidation N	39358	Limbic system-associated membrane protein OS=Mus musculus OX=10090 GN=Lsamp PE=1 SV=1
346	760	P61089|UBE2N_MOUSE	78.12	17	17	17	7830000	3680000	3	3	3	3	Carbamidomethylation	17138	Ubiquitin-conjugating enzyme E2 N OS=Mus musculus OX=10090 GN=Ube2n PE=1 SV=1
271	574	tr|A0A3B2WD96|A0A3B2WD96_MOUSE	77.51	3	3	3	5220000	5670000	3	3	3	4		90203	Band 4.1-like protein 3 OS=Mus musculus OX=10090 GN=Epb41l3 PE=1 SV=1
271	575	tr|A0A3B2WBE1|A0A3B2WBE1_MOUSE	77.51	3	3	3	5220000	5670000	3	3	3	4		91388	Band 4.1-like protein 3 (Fragment) OS=Mus musculus OX=10090 GN=Epb41l3 PE=1 SV=1
271	576	tr|A7YY80|A7YY80_MOUSE	77.51	3	3	3	5220000	5670000	3	3	3	4		97597	130kDa Protein 4.1B MEF cell isoform OS=Mus musculus OX=10090 GN=Epb41l3 PE=1 SV=1
271	578	tr|D0VYV6|D0VYV6_MOUSE	77.51	3	3	3	5220000	5670000	3	3	3	4		101418	Band 4.1-like protein 3 OS=Mus musculus OX=10090 GN=Epb41l3 PE=1 SV=1
271	579	Q9WV92|E41L3_MOUSE	77.51	3	3	3	5220000	5670000	3	3	3	4		103338	Band 4.1-like protein 3 OS=Mus musculus OX=10090 GN=Epb41l3 PE=1 SV=1
444	750	Q9Z1B3|PLCB1_MOUSE	74.75	2	2	2	2330000	2290000	3	3	2	3		138396	1-phosphatidylinositol 4 5-bisphosphate phosphodiesterase beta-1 OS=Mus musculus OX=10090 GN=Plcb1 PE=1 SV=2
450	808	tr|Q3U4W8|Q3U4W8_MOUSE	74.38	4	4	3	301000	1940000	3	3	3	2		93355	Ubiquitin carboxyl-terminal hydrolase OS=Mus musculus OX=10090 GN=Usp5 PE=1 SV=1
450	809	P56399|UBP5_MOUSE	74.38	4	4	3	301000	1940000	3	3	3	2		95833	Ubiquitin carboxyl-terminal hydrolase 5 OS=Mus musculus OX=10090 GN=Usp5 PE=1 SV=1
451	811	Q61361|PGCB_MOUSE	74.28	4	4	3	2130000	3850000	3	3	3	2	Carbamidomethylation; Deamidation N	95815	Brevican core protein OS=Mus musculus OX=10090 GN=Bcan PE=1 SV=2
275	789	P00405|COX2_MOUSE	74.1	11	11	11	50400000	49800000	3	3	5	4		25976	Cytochrome c oxidase subunit 2 OS=Mus musculus OX=10090 GN=Mtco2 PE=1 SV=1
347	800	Q8CGP1|H2B1K_MOUSE	73.97	21	21	21	38400000	37000000	3	3	3	4		13920	Histone H2B type 1-K OS=Mus musculus OX=10090 GN=Hist1h2bk PE=1 SV=3
347	799	Q64525|H2B2B_MOUSE	73.97	21	21	21	38400000	37000000	3	3	3	4		13920	Histone H2B type 2-B OS=Mus musculus OX=10090 GN=Hist2h2bb PE=1 SV=3
347	798	Q6ZWY9|H2B1C_MOUSE	73.97	21	21	21	38400000	37000000	3	3	3	4		13906	Histone H2B type 1-C/E/G OS=Mus musculus OX=10090 GN=Hist1h2bc PE=1 SV=3
347	797	Q64478|H2B1H_MOUSE	73.97	21	21	21	38400000	37000000	3	3	3	4		13920	Histone H2B type 1-H OS=Mus musculus OX=10090 GN=Hist1h2bh PE=1 SV=3
347	796	Q8CGP2|H2B1P_MOUSE	73.97	21	21	21	38400000	37000000	3	3	3	4		13992	Histone H2B type 1-P OS=Mus musculus OX=10090 GN=Hist1h2bp PE=1 SV=3
347	795	P10853|H2B1F_MOUSE	73.97	21	21	21	38400000	37000000	3	3	3	4		13936	Histone H2B type 1-F/J/L OS=Mus musculus OX=10090 GN=Hist1h2bf PE=1 SV=2
347	794	Q64475|H2B1B_MOUSE	73.97	21	21	21	38400000	37000000	3	3	3	4		13952	Histone H2B type 1-B OS=Mus musculus OX=10090 GN=Hist1h2bb PE=1 SV=3
347	793	P10854|H2B1M_MOUSE	73.97	21	21	21	38400000	37000000	3	3	3	4		13936	Histone H2B type 1-M OS=Mus musculus OX=10090 GN=Hist1h2bm PE=1 SV=2
347	801	P70696|H2B1A_MOUSE	73.97	21	21	21	38400000	37000000	3	3	3	4		14237	Histone H2B type 1-A OS=Mus musculus OX=10090 GN=Hist1h2ba PE=1 SV=3
347	803	tr|Q8CBB6|Q8CBB6_MOUSE	73.97	20	20	20	38400000	37000000	3	3	3	4		14888	Histone H2B OS=Mus musculus OX=10090 GN=Hist1h2bq PE=2 SV=1
449	807	P59999|ARPC4_MOUSE	73.89	18	11	18	5110000	3650000	3	3	2	3		19667	Actin-related protein 2/3 complex subunit 4 OS=Mus musculus OX=10090 GN=Arpc4 PE=1 SV=3
307	701	P14148|RL7_MOUSE	73.35	11	11	11	3190000	2850000	3	3	3	3		31420	60S ribosomal protein L7 OS=Mus musculus OX=10090 GN=Rpl7 PE=1 SV=2
307	702	tr|F6XI62|F6XI62_MOUSE	73.35	10	10	10	3190000	2850000	3	3	3	3		32536	60S ribosomal protein L7 (Fragment) OS=Mus musculus OX=10090 GN=Rpl7 PE=1 SV=1
380	605	tr|A0A0G2JFT8|A0A0G2JFT8_MOUSE	73.13	4	3	3	869000	949000	3	3	2	2		74770	Protein RUFY3 OS=Mus musculus OX=10090 GN=Rufy3 PE=1 SV=1
520	770	Q60692|PSB6_MOUSE	72.68	13	13	5	1370000	2820000	3	3	3	1		25379	Proteasome subunit beta type-6 OS=Mus musculus OX=10090 GN=Psmb6 PE=1 SV=3
397	835	Q8K310|MATR3_MOUSE	59.55	3	1	3	12400000	1460000	3	3	1	3		94630	Matrin-3 OS=Mus musculus OX=10090 GN=Matr3 PE=1 SV=1
350	819	Q9CQ54|NDUC2_MOUSE	58.95	23	18	23	5810000	1780000	3	3	2	3		14164	NADH dehydrogenase [ubiquinone] 1 subunit C2 OS=Mus musculus OX=10090 GN=Ndufc2 PE=1 SV=1
448	806	tr|E9Q6M6|E9Q6M6_MOUSE	58.85	10	7	10	15000000	8530000	3	3	2	3		24640	Mitochondrial glutamate carrier 1 OS=Mus musculus OX=10090 GN=Slc25a22 PE=1 SV=1
448	810	Q9D6M3|GHC1_MOUSE	58.85	7	5	7	15000000	8530000	3	3	2	3		34670	Mitochondrial glutamate carrier 1 OS=Mus musculus OX=10090 GN=Slc25a22 PE=1 SV=1
452	817	Q8BPN8|DMXL2_MOUSE	57.74	1	1	0	126000	7600000	3	3	3	1		338209	DmX-like protein 2 OS=Mus musculus OX=10090 GN=Dmxl2 PE=1 SV=3
452	818	tr|B0V2P5|B0V2P5_MOUSE	57.74	1	1	0	126000	7600000	3	3	3	1		340696	DmX-like protein 2 OS=Mus musculus OX=10090 GN=Dmxl2 PE=1 SV=1
524	836	P50247|SAHH_MOUSE	48	6	2	4	876000	1100000	3	3	1	2		47688	Adenosylhomocysteinase OS=Mus musculus OX=10090 GN=Ahcy PE=1 SV=3
3	8	P99024|TBB5_MOUSE	267.98	55	55	52	34200000	30500000	26	2	55	56	Carbamidomethylation; Deamidation N; Oxidation (M)	49671	Tubulin beta-5 chain OS=Mus musculus OX=10090 GN=Tubb5 PE=1 SV=1
15	47	Q9ERD7|TBB3_MOUSE	248.17	34	34	34	9420000	22300000	19	2	37	36	Carbamidomethylation; Deamidation N; Oxidation (M)	50419	Tubulin beta-3 chain OS=Mus musculus OX=10090 GN=Tubb3 PE=1 SV=1
98	143	tr|Q5SVG5|Q5SVG5_MOUSE	155.35	9	9	8	0	1200000	10	2	11	9	Carbamidomethylation	101193	AP complex subunit beta OS=Mus musculus OX=10090 GN=Ap1b1 PE=1 SV=1
98	144	tr|Q5SVG4|Q5SVG4_MOUSE	155.35	9	9	8	0	1200000	10	2	11	9	Carbamidomethylation	101898	AP complex subunit beta OS=Mus musculus OX=10090 GN=Ap1b1 PE=1 SV=1
98	145	O35643|AP1B1_MOUSE	155.35	9	9	8	0	1200000	10	2	11	9	Carbamidomethylation	103935	AP-1 complex subunit beta-1 OS=Mus musculus OX=10090 GN=Ap1b1 PE=1 SV=2
103	227	P63011|RAB3A_MOUSE	151.15	31	25	24	29500000	623000	6	2	10	9	Carbamidomethylation; Deamidation N	24970	Ras-related protein Rab-3A OS=Mus musculus OX=10090 GN=Rab3a PE=1 SV=1
267	430	tr|F7AAP4|F7AAP4_MOUSE	144.8	5	5	3	77900	657000	5	2	4	4	Carbamidomethylation	128562	Calcium-transporting ATPase OS=Mus musculus OX=10090 GN=Atp2b4 PE=1 SV=1
267	431	tr|E9Q828|E9Q828_MOUSE	144.8	5	5	3	77900	657000	5	2	4	4	Carbamidomethylation	129256	Calcium-transporting ATPase OS=Mus musculus OX=10090 GN=Atp2b4 PE=1 SV=1
267	432	Q6Q477|AT2B4_MOUSE	144.8	5	5	3	77900	657000	5	2	4	4	Carbamidomethylation	133068	Plasma membrane calcium-transporting ATPase 4 OS=Mus musculus OX=10090 GN=Atp2b4 PE=1 SV=1
126	311	tr|H3BKR2|H3BKR2_MOUSE	138.74	21	21	21	31600000	17400000	5	2	8	8	Carbamidomethylation	30199	Guanine nucleotide-binding protein G(I)/G(S)/G(T) subunit beta-1 (Fragment) OS=Mus musculus OX=10090 GN=Gnb1 PE=1 SV=8
126	312	P62874|GBB1_MOUSE	138.74	17	17	17	31600000	17400000	5	2	8	8	Carbamidomethylation	37377	Guanine nucleotide-binding protein G(I)/G(S)/G(T) subunit beta-1 OS=Mus musculus OX=10090 GN=Gnb1 PE=1 SV=3
195	329	Q8K0T0|RTN1_MOUSE	134.81	6	6	6	2460000	1650000	5	2	5	6		83572	Reticulon-1 OS=Mus musculus OX=10090 GN=Rtn1 PE=1 SV=1
158	359	P61027|RAB10_MOUSE	128.58	26	22	26	4350000	3750000	5	2	7	7		22541	Ras-related protein Rab-10 OS=Mus musculus OX=10090 GN=Rab10 PE=1 SV=1
250	488	tr|E9PV73|E9PV73_MOUSE	126.3	25	25	25	4360000	4090000	4	2	5	4	Carbamidomethylation	21820	Neuron-specific calcium-binding protein hippocalcin (Fragment) OS=Mus musculus OX=10090 GN=Hpca PE=1 SV=1
250	489	P84075|HPCA_MOUSE	126.3	24	24	24	4360000	4090000	4	2	5	4	Carbamidomethylation	22427	Neuron-specific calcium-binding protein hippocalcin OS=Mus musculus OX=10090 GN=Hpca PE=1 SV=2
437	690	Q7TQF7|AMPH_MOUSE	122.69	6	5	6	4380000	2810000	3	2	2	3	Deamidation N	75013	Amphiphysin OS=Mus musculus OX=10090 GN=Amph PE=1 SV=1
437	692	tr|A0A0G2JEG8|A0A0G2JEG8_MOUSE	122.69	6	5	6	4380000	2810000	3	2	2	3	Deamidation N	75340	Amphiphysin OS=Mus musculus OX=10090 GN=Amph PE=1 SV=1
134	875	Q9JKC6|CEND_MOUSE	120.63	19	19	19	8040000	7900000	2	2	5	6	Deamidation N	14987	Cell cycle exit and neuronal differentiation protein 1 OS=Mus musculus OX=10090 GN=Cend1 PE=1 SV=1
534	943	Q9WUM5|SUCA_MOUSE	114.88	8	8	8	7020000	5780000	2	2	2	2	Carbamidomethylation	36155	Succinate--CoA ligase [ADP/GDP-forming] subunit alpha mitochondrial OS=Mus musculus OX=10090 GN=Suclg1 PE=1 SV=4
446	802	Q9Z0P4|PALM_MOUSE	113.5	10	6	10	1360000	692000	3	2	2	3	Deamidation N	41614	Paralemmin-1 OS=Mus musculus OX=10090 GN=Palm PE=1 SV=1
433	612	Q9DB05|SNAA_MOUSE	109.6	14	9	14	654000	733000	3	2	2	3		33190	Alpha-soluble NSF attachment protein OS=Mus musculus OX=10090 GN=Napa PE=1 SV=1
325	515	P84078|ARF1_MOUSE	108.9	23	17	23	7870000	8120000	4	2	3	4		20697	ADP-ribosylation factor 1 OS=Mus musculus OX=10090 GN=Arf1 PE=1 SV=2
325	514	P61205|ARF3_MOUSE	108.9	23	17	23	7870000	8120000	4	2	3	4		20601	ADP-ribosylation factor 3 OS=Mus musculus OX=10090 GN=Arf3 PE=2 SV=2
434	628	Q91ZZ3|SYUB_MOUSE	107.73	36	26	36	0	0	3	2	2	3	Deamidation N	14052	Beta-synuclein OS=Mus musculus OX=10090 GN=Sncb PE=1 SV=1
162	439	tr|A0A0R4J2C2|A0A0R4J2C2_MOUSE	106.79	10	7	10	3040000	2840000	5	2	5	6		47249	Synaptotagmin II OS=Mus musculus OX=10090 GN=Syt2 PE=1 SV=1
214	274	tr|B2RXT3|B2RXT3_MOUSE	106.32	5	5	4	1220000	1310000	6	2	6	4		114561	Ogdhl protein OS=Mus musculus OX=10090 GN=Ogdhl PE=1 SV=1
214	275	tr|E9Q7L0|E9Q7L0_MOUSE	106.32	5	5	3	1220000	1310000	6	2	6	4		116600	Oxoglutarate dehydrogenase-like OS=Mus musculus OX=10090 GN=Ogdhl PE=1 SV=1
675	1110	P31648|SC6A1_MOUSE	105.94	5	2	5	6400000	1980000	2	2	1	2		67002	Sodium- and chloride-dependent GABA transporter 1 OS=Mus musculus OX=10090 GN=Slc6a1 PE=1 SV=2
396	832	O55143|AT2A2_MOUSE	104.39	4	1	2	46600000		3	2	1	2	Carbamidomethylation	114858	Sarcoplasmic/endoplasmic reticulum calcium ATPase 2 OS=Mus musculus OX=10090 GN=Atp2a2 PE=1 SV=2
313	940	P51150|RAB7A_MOUSE	103.7	13	13	13	545000	1300000	2	2	4	4		23490	Ras-related protein Rab-7a OS=Mus musculus OX=10090 GN=Rab7a PE=1 SV=2
286	436	P80315|TCPD_MOUSE	103.44	8	6	8	1990000	2250000	4	2	3	4	Carbamidomethylation	58066	T-complex protein 1 subunit delta OS=Mus musculus OX=10090 GN=Cct4 PE=1 SV=3
224	474	P35278|RAB5C_MOUSE	103.44	21	21	21	1170000	1460000	4	2	5	5		23412	Ras-related protein Rab-5C OS=Mus musculus OX=10090 GN=Rab5c PE=1 SV=2
224	475	tr|Q8C266|Q8C266_MOUSE	103.44	20	20	20	1170000	1460000	4	2	5	5		25352	Ras-related protein Rab-5C OS=Mus musculus OX=10090 GN=Rab5c PE=1 SV=1
407	955	Q8BG39|SV2B_MOUSE	102.42	3	3	3	2250000	1990000	2	2	3	3	Carbamidomethylation; Deamidation N	77457	Synaptic vesicle glycoprotein 2B OS=Mus musculus OX=10090 GN=Sv2b PE=1 SV=1
381	630	P60335|PCBP1_MOUSE	101.37	11	8	11	2520000	2430000	3	2	2	3	Carbamidomethylation	37498	Poly(rC)-binding protein 1 OS=Mus musculus OX=10090 GN=Pcbp1 PE=1 SV=1
533	942	Q8R191|SNG3_MOUSE	97.9	12	12	12	9360000	9580000	2	2	2	2		24561	Synaptogyrin-3 OS=Mus musculus OX=10090 GN=Syngr3 PE=1 SV=1
204	584	tr|A0A0J9YVA6|A0A0J9YVA6_MOUSE	97.73	16	11	16	5780000	1770000	3	2	5	6		23155	Septin-11 (Fragment) OS=Mus musculus OX=10090 GN=Sept11 PE=1 SV=1
204	585	tr|A0A0J9YTY0|A0A0J9YTY0_MOUSE	97.73	8	5	8	5780000	1770000	3	2	5	6		48979	Septin-11 OS=Mus musculus OX=10090 GN=Sept11 PE=1 SV=1
204	586	Q8C1B7|SEP11_MOUSE	97.73	8	5	8	5780000	1770000	3	2	5	6		49695	Septin-11 OS=Mus musculus OX=10090 GN=Sept11 PE=1 SV=4
204	587	tr|A0A0J9YUL3|A0A0J9YUL3_MOUSE	97.73	8	5	8	5780000	1770000	3	2	5	6		49782	Septin 11 isoform CRA_b OS=Mus musculus OX=10090 GN=Sept11 PE=1 SV=1
659	951	Q9DCT2|NDUS3_MOUSE	94.52	10	5	10	3120000	1720000	2	2	1	2		30149	NADH dehydrogenase [ubiquinone] iron-sulfur protein 3 mitochondrial OS=Mus musculus OX=10090 GN=Ndufs3 PE=1 SV=2
477	998	Q9CPQ8|ATP5L_MOUSE	93.5	27	27	27	14200000	14000000	2	2	3	2		11425	ATP synthase subunit g mitochondrial OS=Mus musculus OX=10090 GN=Atp5mg PE=1 SV=1
376	547	P84084|ARF5_MOUSE	93.22	22	11	22	10300000	1760000	4	2	2	4		20530	ADP-ribosylation factor 5 OS=Mus musculus OX=10090 GN=Arf5 PE=1 SV=2
660	952	P56391|CX6B1_MOUSE	92.03	26	26	13	3260000	5250000	2	2	2	1	Carbamidomethylation	10071	Cytochrome c oxidase subunit 6B1 OS=Mus musculus OX=10090 GN=Cox6b1 PE=1 SV=2
839	1005	P80314|TCPB_MOUSE	92.03	5	5	0		238000	2	2	2	0	Carbamidomethylation	57477	T-complex protein 1 subunit beta OS=Mus musculus OX=10090 GN=Cct2 PE=1 SV=4
542	1004	tr|D3Z568|D3Z568_MOUSE	91.33	20	20	20	1700000	1920000	2	2	2	2		14038	NADH dehydrogenase (Ubiquinone) 1 beta subcomplex 5 isoform CRA_e OS=Mus musculus OX=10090 GN=Ndufb5 PE=1 SV=1
542	1006	Q9CQH3|NDUB5_MOUSE	91.33	13	13	13	1700000	1920000	2	2	2	2		21710	NADH dehydrogenase [ubiquinone] 1 beta subcomplex subunit 5 mitochondrial OS=Mus musculus OX=10090 GN=Ndufb5 PE=1 SV=1
335	577	Q9ES97|RTN3_MOUSE	91.27	3	3	3	14600000	11800000	3	2	3	3		103879	Reticulon-3 OS=Mus musculus OX=10090 GN=Rtn3 PE=1 SV=2
731	1579	tr|A0A1Y7VL93|A0A1Y7VL93_MOUSE	90.1	11	11	9	301000	1780000	2	2	2	1		15353	Ras-related protein Ral-A (Fragment) OS=Mus musculus OX=10090 GN=Rala PE=1 SV=1
731	1580	P63321|RALA_MOUSE	90.1	7	7	6	301000	1780000	2	2	2	1		23553	Ras-related protein Ral-A OS=Mus musculus OX=10090 GN=Rala PE=1 SV=1
661	995	Q80UW2|FBX2_MOUSE	89.41	9	4	9	726000	142000	2	2	1	2	Carbamidomethylation	33676	F-box only protein 2 OS=Mus musculus OX=10090 GN=Fbxo2 PE=1 SV=1
405	913	Q9QUI0|RHOA_MOUSE	88.59	13	13	13	6040000	10500000	2	2	2	2	Carbamidomethylation	21782	Transforming protein RhoA OS=Mus musculus OX=10090 GN=Rhoa PE=1 SV=1
385	669	tr|Z4YKV1|Z4YKV1_MOUSE	88.54	8	8	8	1270000	1290000	3	2	3	3		44178	Guanine nucleotide-binding protein G(s) subunit alpha isoforms short OS=Mus musculus OX=10090 GN=Gnas PE=1 SV=1
385	670	P63094|GNAS2_MOUSE	88.54	8	8	8	1270000	1290000	3	2	3	3		45664	Guanine nucleotide-binding protein G(s) subunit alpha isoforms short OS=Mus musculus OX=10090 GN=Gnas PE=1 SV=1
385	688	Q6R0H7|GNAS1_MOUSE	88.54	3	3	3	1270000	1290000	3	2	3	3		121505	Guanine nucleotide-binding protein G(s) subunit alpha isoforms XLas OS=Mus musculus OX=10090 GN=Gnas PE=1 SV=1
547	1037	P47754|CAZA2_MOUSE	88.25	9	9	9	3010000	2390000	2	2	2	2		32967	F-actin-capping protein subunit alpha-2 OS=Mus musculus OX=10090 GN=Capza2 PE=1 SV=3
277	924	P60879|SNP25_MOUSE	87.98	15	8	15	12400000	8290000	2	2	2	5	Deamidation N	23315	Synaptosomal-associated protein 25 OS=Mus musculus OX=10090 GN=Snap25 PE=1 SV=1
549	1069	Q3UGR5|HDHD2_MOUSE	87.63	8	8	8	2020000	2020000	2	2	2	2		28730	Haloacid dehalogenase-like hydrolase domain-containing protein 2 OS=Mus musculus OX=10090 GN=Hdhd2 PE=1 SV=2
669	1053	Q9R0P5|DEST_MOUSE	87.31	13	8	13	3070000	2030000	2	2	1	2	Carbamidomethylation	18522	Destrin OS=Mus musculus OX=10090 GN=Dstn PE=1 SV=3
663	1003	Q8CCT4|TCAL5_MOUSE	87.26	12	4	12	1260000	1200000	2	2	1	2		22038	Transcription elongation factor A protein-like 5 OS=Mus musculus OX=10090 GN=Tceal5 PE=1 SV=1
229	664	Q60931|VDAC3_MOUSE	87.09	12	12	12	5680000	5620000	3	2	5	5		30753	Voltage-dependent anion-selective channel protein 3 OS=Mus musculus OX=10090 GN=Vdac3 PE=1 SV=1
229	665	tr|J3QMG3|J3QMG3_MOUSE	87.09	12	12	12	5680000	5620000	3	2	5	5		30852	Voltage-dependent anion-selective channel protein 3 OS=Mus musculus OX=10090 GN=Vdac3 PE=1 SV=1
535	956	Q93092|TALDO_MOUSE	87.01	7	7	7	1770000	1590000	2	2	2	2	Carbamidomethylation	37387	Transaldolase OS=Mus musculus OX=10090 GN=Taldo1 PE=1 SV=2
535	957	tr|A0A1B0GR11|A0A1B0GR11_MOUSE	87.01	6	6	6	1770000	1590000	2	2	2	2	Carbamidomethylation	42151	Transaldolase OS=Mus musculus OX=10090 GN=Taldo1 PE=1 SV=1
311	837	P56564|EAA1_MOUSE	86.87	6	6	6	4650000	4450000	2	2	3	3	Carbamidomethylation; Deamidation N	59622	Excitatory amino acid transporter 1 OS=Mus musculus OX=10090 GN=Slc1a3 PE=1 SV=2
664	1008	Q9CPP6|NDUA5_MOUSE	86.64	22	22	8	1310000	3170000	2	2	2	1	Carbamidomethylation	13360	NADH dehydrogenase [ubiquinone] 1 alpha subcomplex subunit 5 OS=Mus musculus OX=10090 GN=Ndufa5 PE=1 SV=3
674	1097	Q8R1I1|QCR9_MOUSE	86.44	38	38	11	4290000	11200000	2	2	2	1		7446	Cytochrome b-c1 complex subunit 9 OS=Mus musculus OX=10090 GN=Uqcr10 PE=1 SV=1
394	780	tr|Q2NKI4|Q2NKI4_MOUSE	86.24	4	4	4	4580000	5360000	3	2	3	3	Carbamidomethylation	72964	Protein kinase C OS=Mus musculus OX=10090 GN=Prkcg PE=1 SV=1
394	782	P63318|KPCG_MOUSE	86.24	4	4	4	4580000	5360000	3	2	3	3	Carbamidomethylation	78358	Protein kinase C gamma type OS=Mus musculus OX=10090 GN=Prkcg PE=1 SV=1
409	1050	P19536|COX5B_MOUSE	86.16	23	23	23	4990000	18100000	2	2	4	2		13813	Cytochrome c oxidase subunit 5B mitochondrial OS=Mus musculus OX=10090 GN=Cox5b PE=1 SV=1
409	1051	tr|Q9D881|Q9D881_MOUSE	86.16	23	23	23	4990000	18100000	2	2	4	2		13847	Cytochrome c oxidase subunit 5B mitochondrial OS=Mus musculus OX=10090 GN=Gm11273 PE=1 SV=1
478	1064	tr|A0A0G2JGY0|A0A0G2JGY0_MOUSE	86.09	17	17	17	8970000	5800000	2	2	2	3	Carbamidomethylation	14821	Dihydropteridine reductase OS=Mus musculus OX=10090 GN=Qdpr PE=1 SV=1
478	1065	tr|D3YWR7|D3YWR7_MOUSE	86.09	13	13	13	8970000	5800000	2	2	2	3	Carbamidomethylation	20008	Dihydropteridine reductase OS=Mus musculus OX=10090 GN=Qdpr PE=1 SV=1
478	1066	tr|A0A0G2JGJ1|A0A0G2JGJ1_MOUSE	86.09	11	11	11	8970000	5800000	2	2	2	3	Carbamidomethylation	22347	Dihydropteridine reductase OS=Mus musculus OX=10090 GN=Qdpr PE=1 SV=1
478	1067	Q8BVI4|DHPR_MOUSE	86.09	10	10	10	8970000	5800000	2	2	2	3	Carbamidomethylation	25570	Dihydropteridine reductase OS=Mus musculus OX=10090 GN=Qdpr PE=1 SV=2
456	839	Q80TL4|PHF24_MOUSE	86.08	6	6	6	1560000	1590000	2	2	2	2	Carbamidomethylation	45223	PHD finger protein 24 OS=Mus musculus OX=10090 GN=Phf24 PE=1 SV=2
340	667	tr|Q6DFY2|Q6DFY2_MOUSE	86	9	9	9	7550000	5640000	3	2	3	3		37156	Opioid-binding protein/cell adhesion molecule-like OS=Mus musculus OX=10090 GN=Opcml PE=1 SV=1
340	668	tr|G5E8G3|G5E8G3_MOUSE	86	9	9	9	7550000	5640000	3	2	3	3		38011	MCG9827 OS=Mus musculus OX=10090 GN=Opcml PE=1 SV=1
251	825	tr|A2AL12|A2AL12_MOUSE	85.52	9	9	9	1800000	2550000	3	2	5	5	Carbamidomethylation	34476	Heterogeneous nuclear ribonucleoprotein A3 OS=Mus musculus OX=10090 GN=Hnrnpa3 PE=1 SV=1
251	826	tr|B2RXM2|B2RXM2_MOUSE	85.52	8	8	8	1800000	2550000	3	2	5	5	Carbamidomethylation	36610	EG627828 protein OS=Mus musculus OX=10090 GN=Gm6793 PE=1 SV=1
251	828	Q8BG05|ROA3_MOUSE	85.52	7	7	7	1800000	2550000	3	2	5	5	Carbamidomethylation	39652	Heterogeneous nuclear ribonucleoprotein A3 OS=Mus musculus OX=10090 GN=Hnrnpa3 PE=1 SV=1
167	1559	tr|Q9Z1R9|Q9Z1R9_MOUSE	84.64	16	16	8	0	1100000	2	2	5	5	Deamidation N; HydroxylProline	26135	MCG124046 OS=Mus musculus OX=10090 GN=Prss1 PE=1 SV=1
463	888	tr|F6ZV59|F6ZV59_MOUSE	84.59	10	10	10	3320000	3040000	2	2	2	2		24730	Heterogeneous nuclear ribonucleoprotein D0 (Fragment) OS=Mus musculus OX=10090 GN=Hnrnpd PE=1 SV=1
463	889	tr|G5E8G0|G5E8G0_MOUSE	84.59	8	8	8	3320000	3040000	2	2	2	2		30608	Heterogeneous nuclear ribonucleoprotein D isoform CRA_b OS=Mus musculus OX=10090 GN=Hnrnpd PE=1 SV=1
463	890	tr|G3X9W0|G3X9W0_MOUSE	84.59	7	7	7	3320000	3040000	2	2	2	2		36208	Heterogeneous nuclear ribonucleoprotein D isoform CRA_a OS=Mus musculus OX=10090 GN=Hnrnpd PE=1 SV=1
463	891	Q60668|HNRPD_MOUSE	84.59	6	6	6	3320000	3040000	2	2	2	2		38354	Heterogeneous nuclear ribonucleoprotein D0 OS=Mus musculus OX=10090 GN=Hnrnpd PE=1 SV=2
419	1585	Q9D0J8|PTMS_MOUSE	84.56	12	12	12	1300000	1210000	2	2	3	3		11430	Parathymosin OS=Mus musculus OX=10090 GN=Ptms PE=1 SV=3
538	989	tr|F7CDT0|F7CDT0_MOUSE	84.49	12	12	12	719000	652000	2	2	2	2	Carbamidomethylation	19824	NEDD8-conjugating enzyme Ubc12 (Fragment) OS=Mus musculus OX=10090 GN=Ube2m PE=1 SV=1
538	990	tr|F6WMC0|F6WMC0_MOUSE	84.49	12	12	12	719000	652000	2	2	2	2	Carbamidomethylation	19973	NEDD8-conjugating enzyme Ubc12 (Fragment) OS=Mus musculus OX=10090 GN=Ube2m PE=1 SV=1
538	991	P61082|UBC12_MOUSE	84.49	11	11	11	719000	652000	2	2	2	2	Carbamidomethylation	20900	NEDD8-conjugating enzyme Ubc12 OS=Mus musculus OX=10090 GN=Ube2m PE=1 SV=1
540	993	tr|D3YU15|D3YU15_MOUSE	84.35	14	14	14	3820000	3890000	2	2	2	2		20241	Dimethylarginine dimethylaminohydrolase 1 isoform CRA_a OS=Mus musculus OX=10090 GN=Ddah1 PE=1 SV=1
540	997	Q9CWS0|DDAH1_MOUSE	84.35	9	9	9	3820000	3890000	2	2	2	2		31381	N(G) N(G)-dimethylarginine dimethylaminohydrolase 1 OS=Mus musculus OX=10090 GN=Ddah1 PE=1 SV=3
537	982	Q8BH95|ECHM_MOUSE	84.33	8	8	8	3200000	2870000	2	2	2	2	Carbamidomethylation	31474	Enoyl-CoA hydratase mitochondrial OS=Mus musculus OX=10090 GN=Echs1 PE=1 SV=1
408	1046	P62806|H4_MOUSE	84.19	19	19	19	20600000	18000000	2	2	3	3		11367	Histone H4 OS=Mus musculus OX=10090 GN=Hist1h4a PE=1 SV=2
550	1071	Q9JJV2|PROF2_MOUSE	83.86	16	16	16	6980000	5880000	2	2	2	2		15032	Profilin-2 OS=Mus musculus OX=10090 GN=Pfn2 PE=1 SV=3
312	896	Q63810|CANB1_MOUSE	83.67	13	13	13	16300000	17400000	2	2	3	3		19300	Calcineurin subunit B type 1 OS=Mus musculus OX=10090 GN=Ppp3r1 PE=1 SV=3
571	1245	P63024|VAMP3_MOUSE	83.64	23	23	23	3440000	15400000	2	2	2	2		11480	Vesicle-associated membrane protein 3 OS=Mus musculus OX=10090 GN=Vamp3 PE=1 SV=1
571	1246	P63044|VAMP2_MOUSE	83.64	21	21	21	3440000	15400000	2	2	2	2		12691	Vesicle-associated membrane protein 2 OS=Mus musculus OX=10090 GN=Vamp2 PE=1 SV=2
571	1249	tr|B0QZN5|B0QZN5_MOUSE	83.64	15	15	15	3440000	15400000	2	2	2	2		17862	Vesicle-associated membrane protein 2 OS=Mus musculus OX=10090 GN=Vamp2 PE=1 SV=1
670	1080	O55100|SNG1_MOUSE	83.59	10	5	10	8950000	0	2	2	1	2		25653	Synaptogyrin-1 OS=Mus musculus OX=10090 GN=Syngr1 PE=1 SV=2
563	1171	tr|A0A1B0GSF7|A0A1B0GSF7_MOUSE	83.38	16	16	16	17900000	14900000	2	2	2	2		15245	60S ribosomal protein L18 OS=Mus musculus OX=10090 GN=Rpl18 PE=1 SV=1
563	1172	tr|A0A1B0GSS8|A0A1B0GSS8_MOUSE	83.38	14	14	14	17900000	14900000	2	2	2	2		17958	60S ribosomal protein L18 OS=Mus musculus OX=10090 GN=Rpl18 PE=1 SV=1
563	1174	tr|A0A1B0GQU8|A0A1B0GQU8_MOUSE	83.38	14	14	14	17900000	14900000	2	2	2	2		18101	60S ribosomal protein L18 OS=Mus musculus OX=10090 GN=Rpl18 PE=1 SV=1
563	1175	P35980|RL18_MOUSE	83.38	12	12	12	17900000	14900000	2	2	2	2		21645	60S ribosomal protein L18 OS=Mus musculus OX=10090 GN=Rpl18 PE=1 SV=3
466	906	Q8K183|PDXK_MOUSE	83.37	9	9	9	3520000	2700000	2	2	2	2		35015	Pyridoxal kinase OS=Mus musculus OX=10090 GN=Pdxk PE=1 SV=1
337	602	P12658|CALB1_MOUSE	83.36	11	8	8	4350000	4010000	3	2	3	3		29994	Calbindin OS=Mus musculus OX=10090 GN=Calb1 PE=1 SV=2
691	1243	P97315|CSRP1_MOUSE	82.4	17	8	17	1300000	1640000	2	2	1	2	Carbamidomethylation; Deamidation N	20583	Cysteine and glycine-rich protein 1 OS=Mus musculus OX=10090 GN=Csrp1 PE=1 SV=3
539	992	tr|S4R1N1|S4R1N1_MOUSE	81.76	10	10	10	1070000	1300000	2	2	2	2		24078	60S acidic ribosomal protein P0 (Fragment) OS=Mus musculus OX=10090 GN=Rplp0 PE=1 SV=1
539	994	P14869|RLA0_MOUSE	81.76	7	7	7	1070000	1300000	2	2	2	2		34216	60S acidic ribosomal protein P0 OS=Mus musculus OX=10090 GN=Rplp0 PE=1 SV=3
458	849	tr|F8WIT2|F8WIT2_MOUSE	81.48	3	3	3	1630000	1480000	2	2	2	2		75289	Annexin OS=Mus musculus OX=10090 GN=Anxa6 PE=1 SV=1
458	850	P14824|ANXA6_MOUSE	81.48	3	3	3	1630000	1480000	2	2	2	2		75885	Annexin A6 OS=Mus musculus OX=10090 GN=Anxa6 PE=1 SV=3
460	859	Q9QXV0|PCSK1_MOUSE	81.02	10	10	10	1010000	1280000	2	2	2	2		27270	ProSAAS OS=Mus musculus OX=10090 GN=Pcsk1n PE=1 SV=2
462	887	P70168|IMB1_MOUSE	81.01	3	3	3	226000	123000	2	2	2	2		97184	Importin subunit beta-1 OS=Mus musculus OX=10090 GN=Kpnb1 PE=1 SV=2
341	678	P62761|VISL1_MOUSE	80.97	16	11	16	8730000	6450000	3	2	3	4		22142	Visinin-like protein 1 OS=Mus musculus OX=10090 GN=Vsnl1 PE=1 SV=2
541	999	P03930|ATP8_MOUSE	80.97	34	34	34	11600000	10500000	2	2	2	2		7766	ATP synthase protein 8 OS=Mus musculus OX=10090 GN=Mtatp8 PE=1 SV=1
351	840	tr|A0A0G2JGQ6|A0A0G2JGQ6_MOUSE	80.46	4	4	4	707000	695000	2	2	3	2		82105	Serine/threonine-protein kinase DCLK1 OS=Mus musculus OX=10090 GN=Dclk1 PE=1 SV=1
351	841	Q9JLM8|DCLK1_MOUSE	80.46	4	4	4	707000	695000	2	2	3	2		84153	Serine/threonine-protein kinase DCLK1 OS=Mus musculus OX=10090 GN=Dclk1 PE=1 SV=1
598	1612	Q8K0S0|PHYIP_MOUSE	80.33	4	4	4	1640000	1410000	2	2	2	2	Carbamidomethylation	37555	Phytanoyl-CoA hydroxylase-interacting protein OS=Mus musculus OX=10090 GN=Phyhip PE=1 SV=1
668	1049	Q9WUC3|LY6H_MOUSE	79.84	15	15	6	2180000	7180000	2	2	2	1	Carbamidomethylation	14669	Lymphocyte antigen 6H OS=Mus musculus OX=10090 GN=Ly6h PE=1 SV=2
668	1060	tr|Q8K356|Q8K356_MOUSE	79.84	13	13	5	2180000	7180000	2	2	2	1	Carbamidomethylation	17028	Lymphocyte antigen 6 complex locus H OS=Mus musculus OX=10090 GN=Ly6h PE=1 SV=1
470	922	tr|D3Z4T6|D3Z4T6_MOUSE	79.61	6	6	6	3950000	3670000	2	2	2	2		36208	Neuronal growth regulator 1 OS=Mus musculus OX=10090 GN=Negr1 PE=1 SV=1
470	921	tr|A0A4W9|A0A4W9_MOUSE	79.61	6	6	6	3950000	3670000	2	2	2	2		36118	Neuronal growth regulator 1 OS=Mus musculus OX=10090 GN=Negr1 PE=1 SV=1
470	923	Q80Z24|NEGR1_MOUSE	79.61	6	6	6	3950000	3670000	2	2	2	2		37900	Neuronal growth regulator 1 OS=Mus musculus OX=10090 GN=Negr1 PE=1 SV=1
546	1021	Q9R0Y5|KAD1_MOUSE	79.19	11	11	11	4570000	3560000	2	2	2	2		21540	Adenylate kinase isoenzyme 1 OS=Mus musculus OX=10090 GN=Ak1 PE=1 SV=1
662	1000	tr|E0CXB1|E0CXB1_MOUSE	78.87	11	11	5	1370000	1530000	2	2	2	1		25264	Proteasome endopeptidase complex OS=Mus musculus OX=10090 GN=Psma6 PE=1 SV=1
662	1001	Q9QUM9|PSA6_MOUSE	78.87	10	10	5	1370000	1530000	2	2	2	1		27372	Proteasome subunit alpha type-6 OS=Mus musculus OX=10090 GN=Psma6 PE=1 SV=1
566	1194	tr|B0R1E3|B0R1E3_MOUSE	78.14	18	18	18	9220000	6870000	2	2	2	2		13439	Histidine triad nucleotide-binding protein 1 OS=Mus musculus OX=10090 GN=Hint1 PE=1 SV=1
566	1198	P70349|HINT1_MOUSE	78.14	17	17	17	9220000	6870000	2	2	2	2		13777	Histidine triad nucleotide-binding protein 1 OS=Mus musculus OX=10090 GN=Hint1 PE=1 SV=3
840	1042	tr|H3BK84|H3BK84_MOUSE	77.68	14	14	0		449000	2	2	2	0	Deamidation N	28464	cAMP-dependent protein kinase type II-beta regulatory subunit OS=Mus musculus OX=10090 GN=Prkar2b PE=1 SV=1
840	1043	P31324|KAP3_MOUSE	77.68	9	9	0		449000	2	2	2	0	Deamidation N	46167	cAMP-dependent protein kinase type II-beta regulatory subunit OS=Mus musculus OX=10090 GN=Prkar2b PE=1 SV=3
690	1241	tr|A0A2I3BRN5|A0A2I3BRN5_MOUSE	76.76	16	16	0		950000	2	2	2	0		21733	Protein FAM49B (Fragment) OS=Mus musculus OX=10090 GN=Fam49b PE=1 SV=1
690	1242	Q921M7|FA49B_MOUSE	76.76	9	9	0		950000	2	2	2	0		36776	Protein FAM49B OS=Mus musculus OX=10090 GN=Fam49b PE=1 SV=1
694	1275	tr|G3UXX3|G3UXX3_MOUSE	75.81	10	3	10	1100000	942000	2	2	1	2		23357	Sepiapterin reductase OS=Mus musculus OX=10090 GN=Spr PE=1 SV=1
694	1276	Q64105|SPRE_MOUSE	75.81	8	3	8	1100000	942000	2	2	1	2		27883	Sepiapterin reductase OS=Mus musculus OX=10090 GN=Spr PE=1 SV=1
694	1277	tr|Q91XH5|Q91XH5_MOUSE	75.81	8	3	8	1100000	942000	2	2	1	2		27928	Sepiapterin reductase OS=Mus musculus OX=10090 GN=Spr PE=1 SV=1
543	1010	Q9CYH2|PXL2A_MOUSE	75.57	11	11	11	752000	824000	2	2	2	2		24395	Peroxiredoxin-like 2A OS=Mus musculus OX=10090 GN=Prxl2a PE=1 SV=2
543	1011	tr|Q3U125|Q3U125_MOUSE	75.57	10	10	10	752000	824000	2	2	2	2		25682	Peroxiredoxin-like 2A OS=Mus musculus OX=10090 GN=Prxl2a PE=1 SV=1
545	1018	Q5PR73|DIRA2_MOUSE	75.18	12	12	12	1990000	1870000	2	2	2	2		22498	GTP-binding protein Di-Ras2 OS=Mus musculus OX=10090 GN=Diras2 PE=1 SV=1
856	1615	tr|A2A513|A2A513_MOUSE	74.89	4	4	0		4030000	2	2	2	0	Oxidation (M)	57041	Keratin type I cytoskeletal 10 OS=Mus musculus OX=10090 GN=Krt10 PE=1 SV=1
856	1616	P02535|K1C10_MOUSE	74.89	4	4	0		4030000	2	2	2	0	Oxidation (M)	57770	Keratin type I cytoskeletal 10 OS=Mus musculus OX=10090 GN=Krt10 PE=1 SV=3
587	1565	tr|A0A0G2JGP4|A0A0G2JGP4_MOUSE	74.8	14	7	14	773000	781000	2	2	1	2	HydroxylProline; Phosphoserine (pS)	20586	GTPase NRas (Fragment) OS=Mus musculus OX=10090 GN=Nras PE=1 SV=1
587	1568	tr|Q9D091|Q9D091_MOUSE	74.8	14	6	14	773000	781000	2	2	1	2	HydroxylProline; Phosphoserine (pS)	21243	GTPase NRas OS=Mus musculus OX=10090 GN=Nras PE=1 SV=1
587	1567	P08556|RASN_MOUSE	74.8	14	6	14	773000	781000	2	2	1	2	HydroxylProline; Phosphoserine (pS)	21199	GTPase NRas OS=Mus musculus OX=10090 GN=Nras PE=1 SV=1
665	1014	tr|A0A0A6YW90|A0A0A6YW90_MOUSE	74.68	4	4	2	102000	565000	2	2	2	1		87152	Glutamate receptor 2 OS=Mus musculus OX=10090 GN=Gria2 PE=1 SV=1
665	1017	P23819|GRIA2_MOUSE	74.68	3	3	2	102000	565000	2	2	2	1		98662	Glutamate receptor 2 OS=Mus musculus OX=10090 GN=Gria2 PE=1 SV=3
665	1016	tr|G5E8H1|G5E8H1_MOUSE	74.68	3	3	2	102000	565000	2	2	2	1		98761	Glutamate receptor 2 OS=Mus musculus OX=10090 GN=Gria2 PE=1 SV=1
665	1015	tr|E9QKC0|E9QKC0_MOUSE	74.68	3	3	2	102000	565000	2	2	2	1		98818	Glutamate receptor 2 OS=Mus musculus OX=10090 GN=Gria2 PE=1 SV=1
671	1084	Q60864|STIP1_MOUSE	74.58	5	2	5	3850000	1900000	2	2	1	2		62582	Stress-induced-phosphoprotein 1 OS=Mus musculus OX=10090 GN=Stip1 PE=1 SV=1
667	1036	tr|Q8BRQ9|Q8BRQ9_MOUSE	74.58	7	3	7	4200000	1170000	2	2	1	2		32783	Sidoreflexin OS=Mus musculus OX=10090 GN=Sfxn5 PE=1 SV=1
667	1040	Q925N0|SFXN5_MOUSE	74.58	6	3	6	4200000	1170000	2	2	1	2		37329	Sideroflexin-5 OS=Mus musculus OX=10090 GN=Sfxn5 PE=1 SV=2
375	544	Q5SQX6|CYFP2_MOUSE	74.49	3	2	2	1380000	96500	4	2	2	2		145659	Cytoplasmic FMR1-interacting protein 2 OS=Mus musculus OX=10090 GN=Cyfip2 PE=1 SV=2
481	1247	P12787|COX5A_MOUSE	72.25	14	10	14	18100000	3960000	2	2	2	3		16101	Cytochrome c oxidase subunit 5A mitochondrial OS=Mus musculus OX=10090 GN=Cox5a PE=1 SV=2
395	792	P68404|KPCB_MOUSE	71.97	4	2	4	3580000	1730000	3	2	2	3	Carbamidomethylation	76751	Protein kinase C beta type OS=Mus musculus OX=10090 GN=Prkcb PE=1 SV=4
472	928	O88737|BSN_MOUSE	71.96	1	1	1	186000	66600	2	2	2	2		418848	Protein bassoon OS=Mus musculus OX=10090 GN=Bsn PE=1 SV=4
558	1116	tr|G3UZD3|G3UZD3_MOUSE	71.96	11	11	11	1770000	2190000	2	2	2	2		21771	Ras-related protein Rab-11B OS=Mus musculus OX=10090 GN=Rab11b PE=1 SV=1
558	1120	P46638|RB11B_MOUSE	71.96	10	10	10	1770000	2190000	2	2	2	2		24489	Ras-related protein Rab-11B OS=Mus musculus OX=10090 GN=Rab11b PE=1 SV=3
567	1199	tr|A0A087WRD6|A0A087WRD6_MOUSE	71.3	11	11	11	11200000	10400000	2	2	2	2		18735	Myelin-associated glycoprotein (Fragment) OS=Mus musculus OX=10090 GN=Mag PE=1 SV=1
567	1203	tr|Q3ZB60|Q3ZB60_MOUSE	71.3	3	3	3	11200000	10400000	2	2	2	2		62587	Mag protein (Fragment) OS=Mus musculus OX=10090 GN=Mag PE=1 SV=1
567	1205	P20917|MAG_MOUSE	71.3	3	3	3	11200000	10400000	2	2	2	2		69260	Myelin-associated glycoprotein OS=Mus musculus OX=10090 GN=Mag PE=1 SV=2
567	1206	tr|A0A087WPR1|A0A087WPR1_MOUSE	71.3	3	3	3	11200000	10400000	2	2	2	2		69388	Myelin-associated glycoprotein OS=Mus musculus OX=10090 GN=Mag PE=1 SV=1
556	1107	Q8VDW0|DX39A_MOUSE	71.14	5	5	5	1430000	1810000	2	2	2	2		49067	ATP-dependent RNA helicase DDX39A OS=Mus musculus OX=10090 GN=Ddx39a PE=1 SV=1
556	1108	Q9Z1N5|DX39B_MOUSE	71.14	5	5	5	1430000	1810000	2	2	2	2		49035	Spliceosome RNA helicase Ddx39b OS=Mus musculus OX=10090 GN=Ddx39b PE=1 SV=1
531	908	P08226|APOE_MOUSE	69.87	7	7	3	1180000	1740000	2	2	2	1		35867	Apolipoprotein E OS=Mus musculus OX=10090 GN=Apoe PE=1 SV=2
692	1259	P35762|CD81_MOUSE	69.87	19	9	19	0	0	2	2	1	2	Carbamidomethylation; Deamidation N	25815	CD81 antigen OS=Mus musculus OX=10090 GN=Cd81 PE=1 SV=2
551	1073	Q8BGH2|SAM50_MOUSE	69.53	4	4	4	1780000	1450000	2	2	2	2		51864	Sorting and assembly machinery component 50 homolog OS=Mus musculus OX=10090 GN=Samm50 PE=1 SV=1
654	867	P28271|ACOC_MOUSE	69.24	2	1	2	112000	235000	2	2	1	1		98126	Cytoplasmic aconitate hydratase OS=Mus musculus OX=10090 GN=Aco1 PE=1 SV=3
560	1135	P07759|SPA3K_MOUSE	68.76	6	6	6	2700000	2210000	2	2	2	2		46880	Serine protease inhibitor A3K OS=Mus musculus OX=10090 GN=Serpina3k PE=1 SV=2
412	1200	Q9D0K2|SCOT1_MOUSE	68.07	4	4	4	5260000	5270000	2	2	3	3		55989	Succinyl-CoA:3-ketoacid coenzyme A transferase 1 mitochondrial OS=Mus musculus OX=10090 GN=Oxct1 PE=1 SV=1
554	927	Q80TZ3|AUXI_MOUSE	68.01	3	3	3	329000	396000	2	2	2	2	Carbamidomethylation	102299	Putative tyrosine-protein phosphatase auxilin OS=Mus musculus OX=10090 GN=Dnajc6 PE=1 SV=2
684	1192	Q64433|CH10_MOUSE	67.19	21	7	21	1630000	1540000	2	2	1	2		10963	10 kDa heat shock protein mitochondrial OS=Mus musculus OX=10090 GN=Hspe1 PE=1 SV=2
529	874	Q8BWF0|SSDH_MOUSE	66.88	4	4	0		2520000	2	2	2	0		55968	Succinate-semialdehyde dehydrogenase mitochondrial OS=Mus musculus OX=10090 GN=Aldh5a1 PE=1 SV=1
693	1262	Q99JY0|ECHB_MOUSE	66.65	4	2	4	2220000	1420000	2	2	1	2		51386	Trifunctional enzyme subunit beta mitochondrial OS=Mus musculus OX=10090 GN=Hadhb PE=1 SV=1
673	1090	P68040|RACK1_MOUSE	66.44	6	6	3	1050000	1150000	2	2	2	1		35077	Receptor of activated protein C kinase 1 OS=Mus musculus OX=10090 GN=Rack1 PE=1 SV=3
552	1076	Q06185|ATP5I_MOUSE	66.42	32	32	17	7060000	11000000	2	2	3	1		8236	ATP synthase subunit e mitochondrial OS=Mus musculus OX=10090 GN=Atp5me PE=1 SV=2
565	1191	tr|D6RIL6|D6RIL6_MOUSE	66.41	7	7	7	1030000	856000	2	2	2	2		32805	Isocitrate dehydrogenase [NADP] mitochondrial OS=Mus musculus OX=10090 GN=Idh2 PE=1 SV=1
565	1207	P54071|IDHP_MOUSE	66.41	4	4	4	1030000	856000	2	2	2	2		50906	Isocitrate dehydrogenase [NADP] mitochondrial OS=Mus musculus OX=10090 GN=Idh2 PE=1 SV=3
406	916	Q9CR68|UCRI_MOUSE	66.33	6	6	6	8500000	8200000	2	2	2	2		29368	Cytochrome b-c1 complex subunit Rieske mitochondrial OS=Mus musculus OX=10090 GN=Uqcrfs1 PE=1 SV=1
676	1111	tr|D3Z1U9|D3Z1U9_MOUSE	66.05	5	2	5	7740000	4220000	2	2	1	2		41834	NADH dehydrogenase [ubiquinone] flavoprotein 1 mitochondrial OS=Mus musculus OX=10090 GN=Ndufv1 PE=1 SV=1
676	1117	tr|D3YUM1|D3YUM1_MOUSE	66.05	4	2	4	7740000	4220000	2	2	1	2		49913	NADH dehydrogenase [ubiquinone] flavoprotein 1 mitochondrial OS=Mus musculus OX=10090 GN=Ndufv1 PE=1 SV=1
676	1118	Q91YT0|NDUV1_MOUSE	66.05	4	2	4	7740000	4220000	2	2	1	2		50834	NADH dehydrogenase [ubiquinone] flavoprotein 1 mitochondrial OS=Mus musculus OX=10090 GN=Ndufv1 PE=1 SV=1
482	1321	tr|D3Z6G3|D3Z6G3_MOUSE	65.94	7	4	7	6800000	1700000	2	2	1	2	Carbamidomethylation	30364	Microtubule-associated protein RP/EB family member 3 OS=Mus musculus OX=10090 GN=Mapre3 PE=1 SV=1
482	1322	Q6PER3|MARE3_MOUSE	65.94	6	4	6	6800000	1700000	2	2	1	2	Carbamidomethylation	31966	Microtubule-associated protein RP/EB family member 3 OS=Mus musculus OX=10090 GN=Mapre3 PE=1 SV=1
479	1092	tr|A0A0A6YW67|A0A0A6YW67_MOUSE	65.93	23	23	12	4710000	3870000	2	2	4	1		8728	MCG23377 isoform CRA_b OS=Mus musculus OX=10090 GN=Gm8797 PE=4 SV=1
479	1095	tr|E9Q9J0|E9Q9J0_MOUSE	65.93	19	19	9	4710000	3870000	2	2	4	1		10914	Ubiquitin-60S ribosomal protein L40 (Fragment) OS=Mus musculus OX=10090 GN=Uba52 PE=4 SV=1
479	1098	P62984|RL40_MOUSE	65.93	14	14	7	4710000	3870000	2	2	4	1		14728	Ubiquitin-60S ribosomal protein L40 OS=Mus musculus OX=10090 GN=Uba52 PE=1 SV=2
479	1101	P62983|RS27A_MOUSE	65.93	12	12	6	4710000	3870000	2	2	4	1		17951	Ubiquitin-40S ribosomal protein S27a OS=Mus musculus OX=10090 GN=Rps27a PE=1 SV=2
479	1103	tr|E9Q4P0|E9Q4P0_MOUSE	65.93	9	9	5	4710000	3870000	2	2	4	1		22234	KxDL motif-containing protein 1 (Fragment) OS=Mus musculus OX=10090 GN=Kxd1 PE=1 SV=1
479	1104	tr|E9Q5F6|E9Q5F6_MOUSE	65.93	9	9	4	4710000	3870000	2	2	4	1		22592	Polyubiquitin-C (Fragment) OS=Mus musculus OX=10090 GN=Ubc PE=1 SV=1
479	1105	tr|E9QNP0|E9QNP0_MOUSE	65.93	8	8	4	4710000	3870000	2	2	4	1		26856	KxDL motif-containing protein 1 OS=Mus musculus OX=10090 GN=Kxd1 PE=1 SV=1
479	1106	tr|Q5SX22|Q5SX22_MOUSE	65.93	8	8	4	4710000	3870000	2	2	4	1		26620	Polyubiquitin-B (Fragment) OS=Mus musculus OX=10090 GN=Ubb PE=4 SV=2
479	1112	P0CG49|UBB_MOUSE	65.93	6	6	3	4710000	3870000	2	2	4	1		34369	Polyubiquitin-B OS=Mus musculus OX=10090 GN=Ubb PE=2 SV=1
479	1144	P0CG50|UBC_MOUSE	65.93	2	2	1	4710000	3870000	2	2	4	1		82550	Polyubiquitin-C OS=Mus musculus OX=10090 GN=Ubc PE=1 SV=2
390	736	Q8R0Y6|AL1L1_MOUSE	65.21	4	2	4	387000	435000	3	2	2	3		98709	Cytosolic 10-formyltetrahydrofolate dehydrogenase OS=Mus musculus OX=10090 GN=Aldh1l1 PE=1 SV=1
680	1155	Q62095|DDX3Y_MOUSE	65.2	3	1	3	647000	229000	2	2	1	2		73428	ATP-dependent RNA helicase DDX3Y OS=Mus musculus OX=10090 GN=Ddx3y PE=1 SV=2
680	1156	P16381|DDX3L_MOUSE	65.2	3	1	3	647000	229000	2	2	1	2		73141	Putative ATP-dependent RNA helicase Pl10 OS=Mus musculus OX=10090 GN=D1Pas1 PE=1 SV=1
680	1157	Q62167|DDX3X_MOUSE	65.2	3	1	3	647000	229000	2	2	1	2		73102	ATP-dependent RNA helicase DDX3X OS=Mus musculus OX=10090 GN=Ddx3x PE=1 SV=3
559	1133	Q8BLE7|VGLU2_MOUSE	64.81	3	3	3	2960000	3230000	2	2	2	2	Carbamidomethylation	64561	Vesicular glutamate transporter 2 OS=Mus musculus OX=10090 GN=Slc17a6 PE=1 SV=1
559	1132	tr|A0A0R4J0A6|A0A0R4J0A6_MOUSE	64.81	3	3	3	2960000	3230000	2	2	2	2	Carbamidomethylation	64560	Solute carrier family 17 (Sodium-dependent inorganic phosphate cotransporter) member 6 isoform CRA_a OS=Mus musculus OX=10090 GN=Slc17a6 PE=1 SV=1
678	1124	tr|H3BJP2|H3BJP2_MOUSE	64.41	12	7	12	1330000	0	2	2	1	2	Carbamidomethylation; Deamidation N	27131	S-formylglutathione hydrolase (Fragment) OS=Mus musculus OX=10090 GN=Esd PE=1 SV=1
678	1125	tr|H3BLJ9|H3BLJ9_MOUSE	64.41	12	7	12	1330000	0	2	2	1	2	Carbamidomethylation; Deamidation N	28554	S-formylglutathione hydrolase OS=Mus musculus OX=10090 GN=Esd PE=1 SV=1
678	1126	tr|H3BJL6|H3BJL6_MOUSE	64.41	11	7	11	1330000	0	2	2	1	2	Carbamidomethylation; Deamidation N	29347	S-formylglutathione hydrolase OS=Mus musculus OX=10090 GN=Esd PE=1 SV=1
678	1127	Q9R0P3|ESTD_MOUSE	64.41	11	6	11	1330000	0	2	2	1	2	Carbamidomethylation; Deamidation N	31320	S-formylglutathione hydrolase OS=Mus musculus OX=10090 GN=Esd PE=1 SV=1
678	1128	tr|H3BKH6|H3BKH6_MOUSE	64.41	10	6	10	1330000	0	2	2	1	2	Carbamidomethylation; Deamidation N	32829	S-formylglutathione hydrolase OS=Mus musculus OX=10090 GN=Esd PE=1 SV=1
672	1089	O54983|CRYM_MOUSE	63.94	8	3	8	2330000	1260000	2	2	1	2		33523	Ketimine reductase mu-crystallin OS=Mus musculus OX=10090 GN=Crym PE=1 SV=1
686	1228	tr|A0A0A6YWP6|A0A0A6YWP6_MOUSE	63.81	5	5	2	2840000	2570000	2	2	2	1		50811	V-type proton ATPase subunit H OS=Mus musculus OX=10090 GN=Atp6v1h PE=1 SV=1
686	1232	tr|A0A0A6YX18|A0A0A6YX18_MOUSE	63.81	4	4	2	2840000	2570000	2	2	2	1		54109	V-type proton ATPase subunit H OS=Mus musculus OX=10090 GN=Atp6v1h PE=1 SV=1
686	1233	Q8BVE3|VATH_MOUSE	63.81	4	4	1	2840000	2570000	2	2	2	1		55855	V-type proton ATPase subunit H OS=Mus musculus OX=10090 GN=Atp6v1h PE=1 SV=1
404	909	tr|G5E884|G5E884_MOUSE	63.79	4	4	4	2680000	4260000	2	2	2	2		60608	Non-specific serine/threonine protein kinase OS=Mus musculus OX=10090 GN=Pak1 PE=1 SV=1
404	910	O88643|PAK1_MOUSE	63.79	4	4	4	2680000	4260000	2	2	2	2		60737	Serine/threonine-protein kinase PAK 1 OS=Mus musculus OX=10090 GN=Pak1 PE=1 SV=1
677	1119	P62702|RS4X_MOUSE	62.96	7	7	3	2710000	4100000	2	2	2	1		29598	40S ribosomal protein S4 X isoform OS=Mus musculus OX=10090 GN=Rps4x PE=1 SV=2
557	1113	tr|A0A2I3BR94|A0A2I3BR94_MOUSE	62.85	15	15	15	3030000	1910000	2	2	2	2		15916	Glia maturation factor beta (Fragment) OS=Mus musculus OX=10090 GN=Gmfb PE=1 SV=1
557	1114	Q9CQI3|GMFB_MOUSE	62.85	14	14	14	3030000	1910000	2	2	2	2		16723	Glia maturation factor beta OS=Mus musculus OX=10090 GN=Gmfb PE=1 SV=3
557	1115	tr|A0A2I3BPS1|A0A2I3BPS1_MOUSE	62.85	13	13	13	3030000	1910000	2	2	2	2		18377	Glia maturation factor beta (Fragment) OS=Mus musculus OX=10090 GN=Gmfb PE=1 SV=1
842	1142	tr|J3QP71|J3QP71_MOUSE	62.14	13	0	13	3560000		2	2	0	2		21721	Basigin (Fragment) OS=Mus musculus OX=10090 GN=Bsg PE=1 SV=1
414	1326	tr|Q6PBC0|Q6PBC0_MOUSE	61.9	21	9	21	746000	257000	2	2	1	3		14931	Cds2 protein OS=Mus musculus OX=10090 GN=Cds2 PE=1 SV=1
414	1327	Q99L43|CDS2_MOUSE	61.9	6	3	6	746000	257000	2	2	1	3		51314	Phosphatidate cytidylyltransferase 2 OS=Mus musculus OX=10090 GN=Cds2 PE=1 SV=1
576	1292	P48771|CX7A2_MOUSE	61.8	22	22	22	6340000	5620000	2	2	2	2		9291	Cytochrome c oxidase subunit 7A2 mitochondrial OS=Mus musculus OX=10090 GN=Cox7a2 PE=1 SV=2
480	1164	tr|G3UYZ1|G3UYZ1_MOUSE	61.77	3	3	3	2910000	3050000	2	2	2	2		58132	Immunoglobulin superfamily member 8 OS=Mus musculus OX=10090 GN=Igsf8 PE=1 SV=1
480	1178	Q8R366|IGSF8_MOUSE	61.77	3	3	3	2910000	3050000	2	2	2	2		65011	Immunoglobulin superfamily member 8 OS=Mus musculus OX=10090 GN=Igsf8 PE=1 SV=2
480	1177	tr|A0A0R4J117|A0A0R4J117_MOUSE	61.77	3	3	3	2910000	3050000	2	2	2	2		65006	Immunoglobulin superfamily member 8 OS=Mus musculus OX=10090 GN=Igsf8 PE=1 SV=1
570	1234	Q9ER00|STX12_MOUSE	61.71	7	7	7	707000	758000	2	2	2	2		31195	Syntaxin-12 OS=Mus musculus OX=10090 GN=Stx12 PE=1 SV=1
847	1272	P70404|IDHG1_MOUSE	61.13	6	0	6	2590000		2	2	0	2	Carbamidomethylation	42785	Isocitrate dehydrogenase [NAD] subunit gamma 1 mitochondrial OS=Mus musculus OX=10090 GN=Idh3g PE=1 SV=1
841	1140	tr|A2A6U5|A2A6U5_MOUSE	60.82	8	0	8	1460000		2	2	0	2		27598	Septin-9 (Fragment) OS=Mus musculus OX=10090 GN=Sept9 PE=1 SV=1
841	1145	tr|A2A6U3|A2A6U3_MOUSE	60.82	3	0	3	1460000		2	2	0	2		63773	Septin-9 OS=Mus musculus OX=10090 GN=Sept9 PE=1 SV=1
841	1146	Q80UG5|SEPT9_MOUSE	60.82	3	0	3	1460000		2	2	0	2		65575	Septin-9 OS=Mus musculus OX=10090 GN=Sept9 PE=1 SV=1
356	1317	tr|A0A0N4SVT3|A0A0N4SVT3_MOUSE	60.62	28	17	28	7410000	1840000	2	2	3	3	Deamidation N	7197	Guanine nucleotide-binding protein subunit gamma (Fragment) OS=Mus musculus OX=10090 GN=Gng12 PE=1 SV=1
356	1318	Q9DAS9|GBG12_MOUSE	60.62	25	15	25	7410000	1840000	2	2	3	3	Deamidation N	7997	Guanine nucleotide-binding protein G(I)/G(S)/G(O) subunit gamma-12 OS=Mus musculus OX=10090 GN=Gng12 PE=1 SV=3
356	1319	tr|A0A0N4SW28|A0A0N4SW28_MOUSE	60.62	22	13	22	7410000	1840000	2	2	3	3	Deamidation N	9182	Guanine nucleotide-binding protein subunit gamma OS=Mus musculus OX=10090 GN=Gng12 PE=1 SV=1
279	1484	tr|Q9CPN9|Q9CPN9_MOUSE	60.48	5	5	5	13100000	13500000	2	2	3	3		26422	RIKEN cDNA 2210010C04 gene OS=Mus musculus OX=10090 GN=2210010C04Rik PE=1 SV=1
568	1212	P47911|RL6_MOUSE	59.87	6	6	6	3160000	1660000	2	2	2	2		33510	60S ribosomal protein L6 OS=Mus musculus OX=10090 GN=Rpl6 PE=1 SV=3
695	1278	Q62048|PEA15_MOUSE	59.82	16	16	8	0	2930000	2	2	2	1	Carbamidomethylation	15054	Astrocytic phosphoprotein PEA-15 OS=Mus musculus OX=10090 GN=Pea15 PE=1 SV=1
843	1193	Q8CGK3|LONM_MOUSE	58.98	2	0	2	215000		2	2	0	2	Carbamidomethylation	105843	Lon protease homolog mitochondrial OS=Mus musculus OX=10090 GN=Lonp1 PE=1 SV=2
562	1151	Q9Z2U0|PSA7_MOUSE	58.93	8	8	8	4160000	4180000	2	2	2	2		27855	Proteasome subunit alpha type-7 OS=Mus musculus OX=10090 GN=Psma7 PE=1 SV=1
564	1189	Q7TQD2|TPPP_MOUSE	58.59	8	8	8	11300000	9180000	2	2	2	2		23575	Tubulin polymerization-promoting protein OS=Mus musculus OX=10090 GN=Tppp PE=1 SV=1
681	1158	tr|B2KFA8|B2KFA8_MOUSE	58.58	9	5	9	1250000	924000	2	2	1	2		24704	Branched-chain-amino-acid aminotransferase cytosolic (Fragment) OS=Mus musculus OX=10090 GN=Bcat1 PE=1 SV=8
681	1159	P24288|BCAT1_MOUSE	58.58	5	3	5	1250000	924000	2	2	1	2		42791	Branched-chain-amino-acid aminotransferase cytosolic OS=Mus musculus OX=10090 GN=Bcat1 PE=1 SV=2
681	1160	tr|E9Q4K3|E9Q4K3_MOUSE	58.58	5	3	5	1250000	924000	2	2	1	2		43518	Branched-chain-amino-acid aminotransferase OS=Mus musculus OX=10090 GN=Bcat1 PE=1 SV=1
681	1161	tr|Q8CBC8|Q8CBC8_MOUSE	58.58	5	2	5	1250000	924000	2	2	1	2		49901	Branched-chain-amino-acid aminotransferase OS=Mus musculus OX=10090 GN=Bcat1 PE=1 SV=1
682	1179	P62881|GNB5_MOUSE	58.07	5	3	5	2280000	1510000	2	2	1	2		43565	Guanine nucleotide-binding protein subunit beta-5 OS=Mus musculus OX=10090 GN=Gnb5 PE=1 SV=1
688	1239	Q8BH66|ATLA1_MOUSE	58.01	3	3	2	80600	509000	2	2	2	1		63378	Atlastin-1 OS=Mus musculus OX=10090 GN=Atl1 PE=1 SV=1
683	1186	P63323|RS12_MOUSE	57.23	14	14	7	0	985000	2	2	2	1	Carbamidomethylation	14525	40S ribosomal protein S12 OS=Mus musculus OX=10090 GN=Rps12 PE=1 SV=2
683	1185	tr|Q6ZWZ6|Q6ZWZ6_MOUSE	57.23	14	14	7	0	985000	2	2	2	1	Carbamidomethylation	14515	40S ribosomal protein S12 OS=Mus musculus OX=10090 GN=Rps12-ps3 PE=1 SV=1
683	1187	tr|F7AEH4|F7AEH4_MOUSE	57.23	14	14	7	0	985000	2	2	2	1	Carbamidomethylation	15181	40S ribosomal protein S12 OS=Mus musculus OX=10090 GN=Rps12 PE=1 SV=1
683	1188	tr|A0A1W2P7A1|A0A1W2P7A1_MOUSE	57.23	13	13	6	0	985000	2	2	2	1	Carbamidomethylation	15979	40S ribosomal protein S12 OS=Mus musculus OX=10090 GN=Rps12 PE=1 SV=1
572	1248	tr|S4R1N6|S4R1N6_MOUSE	56.64	16	16	16	1180000	1000000	2	2	2	2		12483	40S ribosomal protein S18 OS=Mus musculus OX=10090 GN=Rps18 PE=3 SV=1
572	1253	tr|F6YVP7|F6YVP7_MOUSE	56.64	11	11	11	1180000	1000000	2	2	2	2		17672	Predicted gene 10260 OS=Mus musculus OX=10090 GN=Gm10260 PE=3 SV=2
572	1252	tr|A0A1Y7VKY1|A0A1Y7VKY1_MOUSE	56.64	11	11	11	1180000	1000000	2	2	2	2		17749	MCG116671 OS=Mus musculus OX=10090 GN=Gm11361 PE=3 SV=1
572	1251	P62270|RS18_MOUSE	56.64	11	11	11	1180000	1000000	2	2	2	2		17719	40S ribosomal protein S18 OS=Mus musculus OX=10090 GN=Rps18 PE=1 SV=3
569	1219	P97351|RS3A_MOUSE	55.87	6	6	6	4780000	4460000	2	2	2	2		29885	40S ribosomal protein S3a OS=Mus musculus OX=10090 GN=Rps3a PE=1 SV=3
525	843	tr|Q5U4C2|Q5U4C2_MOUSE	55.77	3	1	3	3320000	890000	2	2	1	2		91133	Dipeptidyl aminopeptidase-like protein 6 OS=Mus musculus OX=10090 GN=Dpp6 PE=1 SV=1
525	844	tr|Q80VM5|Q80VM5_MOUSE	55.77	3	1	3	3320000	890000	2	2	1	2		91214	Dipeptidyl aminopeptidase-like protein 6 OS=Mus musculus OX=10090 GN=Dpp6 PE=1 SV=1
525	845	Q9Z218|DPP6_MOUSE	55.77	3	1	3	3320000	890000	2	2	1	2		91260	Dipeptidyl aminopeptidase-like protein 6 OS=Mus musculus OX=10090 GN=Dpp6 PE=1 SV=1
525	846	tr|E9PWX1|E9PWX1_MOUSE	55.77	3	1	3	3320000	890000	2	2	1	2		97224	Dipeptidyl aminopeptidase-like protein 6 OS=Mus musculus OX=10090 GN=Dpp6 PE=1 SV=1
526	854	Q9EQF6|DPYL5_MOUSE	55.05	3	3	1	3200000	7030000	2	2	2	1		61516	Dihydropyrimidinase-related protein 5 OS=Mus musculus OX=10090 GN=Dpysl5 PE=1 SV=1
845	1214	P11404|FABPH_MOUSE	54.64	17	17	0		5760000	2	2	2	0		14819	Fatty acid-binding protein heart OS=Mus musculus OX=10090 GN=Fabp3 PE=1 SV=5
473	929	P58389|PTPA_MOUSE	54.6	7	7	7	2630000	2370000	2	2	2	2		36710	Serine/threonine-protein phosphatase 2A activator OS=Mus musculus OX=10090 GN=Ptpa PE=1 SV=1
697	1289	Q9DC70|NDUS7_MOUSE	54.21	7	7	4	2500000	4320000	2	2	2	1		24683	NADH dehydrogenase [ubiquinone] iron-sulfur protein 7 mitochondrial OS=Mus musculus OX=10090 GN=Ndufs7 PE=1 SV=1
573	1250	tr|D3YVC1|D3YVC1_MOUSE	53.5	6	6	6	14600000	13400000	2	2	2	2		28601	40S ribosomal protein S2 (Fragment) OS=Mus musculus OX=10090 GN=Rps2 PE=1 SV=1
573	1255	P25444|RS2_MOUSE	53.5	5	5	5	14600000	13400000	2	2	2	2		31231	40S ribosomal protein S2 OS=Mus musculus OX=10090 GN=Rps2 PE=1 SV=3
573	1256	tr|D3YWJ3|D3YWJ3_MOUSE	53.5	5	5	5	14600000	13400000	2	2	2	2		32105	40S ribosomal protein S2 OS=Mus musculus OX=10090 GN=Rps2 PE=1 SV=1
687	1231	P35564|CALX_MOUSE	52.86	3	2	3	2900000	796000	2	2	1	2		67278	Calnexin OS=Mus musculus OX=10090 GN=Canx PE=1 SV=1
658	933	tr|B1AZ46|B1AZ46_MOUSE	52.64	4	2	2	416000	588000	2	2	1	1		57682	Brain-specific angiogenesis inhibitor 1-associated protein 2 OS=Mus musculus OX=10090 GN=Baiap2 PE=1 SV=1
658	934	Q8BKX1|BAIP2_MOUSE	52.64	4	1	2	416000	588000	2	2	1	1		59237	Brain-specific angiogenesis inhibitor 1-associated protein 2 OS=Mus musculus OX=10090 GN=Baiap2 PE=1 SV=2
575	1279	P49722|PSA2_MOUSE	52.49	8	8	8	2180000	1580000	2	2	2	2		25927	Proteasome subunit alpha type-2 OS=Mus musculus OX=10090 GN=Psma2 PE=1 SV=3
685	1225	tr|A0A1L1SQA8|A0A1L1SQA8_MOUSE	51.85	20	10	20	3790000	3250000	2	2	1	2		10309	40S ribosomal protein S25 OS=Mus musculus OX=10090 GN=Rps25 PE=1 SV=1
685	1226	P62852|RS25_MOUSE	51.85	15	7	15	3790000	3250000	2	2	1	2		13742	40S ribosomal protein S25 OS=Mus musculus OX=10090 GN=Rps25 PE=1 SV=1
689	1240	O88342|WDR1_MOUSE	51.79	3	1	3	2320000	1720000	2	2	1	2	Carbamidomethylation	66407	WD repeat-containing protein 1 OS=Mus musculus OX=10090 GN=Wdr1 PE=1 SV=3
850	1294	tr|G3UWE1|G3UWE1_MOUSE	51.46	5	2	3	8750000	312000	2	2	1	1		34244	MCG11048 isoform CRA_c OS=Mus musculus OX=10090 GN=Tecr PE=1 SV=1
850	1295	Q9CY27|TECR_MOUSE	51.46	5	2	3	8750000	312000	2	2	1	1		36090	Very-long-chain enoyl-CoA reductase OS=Mus musculus OX=10090 GN=Tecr PE=1 SV=1
850	1297	tr|Q52L67|Q52L67_MOUSE	51.46	4	2	2	8750000	312000	2	2	1	1		41896	Gpsn2 protein OS=Mus musculus OX=10090 GN=Tecr PE=1 SV=1
574	1261	Q9CPQ1|COX6C_MOUSE	51.03	18	18	18	7180000	16900000	2	2	2	2		8469	Cytochrome c oxidase subunit 6C OS=Mus musculus OX=10090 GN=Cox6c PE=1 SV=3
352	903	P63005|LIS1_MOUSE	50.66	5	5	2	2130000	3490000	2	2	2	1	Carbamidomethylation	46670	Platelet-activating factor acetylhydrolase IB subunit alpha OS=Mus musculus OX=10090 GN=Pafah1b1 PE=1 SV=2
848	1273	tr|E9PYF1|E9PYF1_MOUSE	50.56	4	2	2	310000	197000	2	2	1	1	Carbamidomethylation	68002	Aminopeptidase B OS=Mus musculus OX=10090 GN=Rnpep PE=1 SV=1
848	1274	Q8VCT3|AMPB_MOUSE	50.56	3	2	2	310000	197000	2	2	1	1	Carbamidomethylation	72416	Aminopeptidase B OS=Mus musculus OX=10090 GN=Rnpep PE=1 SV=2
854	1343	Q8R5H6|WASF1_MOUSE	50.54	3	3	0		1460000	2	2	2	0	Carbamidomethylation	61509	Wiskott-Aldrich syndrome protein family member 1 OS=Mus musculus OX=10090 GN=Wasf1 PE=1 SV=2
656	900	B1AWN6|SCN2A_MOUSE	49.93	2	0	2	143000		2	2	0	2		227943	Sodium channel protein type 2 subunit alpha OS=Mus musculus OX=10090 GN=Scn2a PE=1 SV=1
580	1360	Q63912|OMGP_MOUSE	49.27	4	2	4	18000000	2730000	2	2	1	2		49284	Oligodendrocyte-myelin glycoprotein OS=Mus musculus OX=10090 GN=Omg PE=1 SV=1
580	1361	tr|G3XA53|G3XA53_MOUSE	49.27	4	2	4	18000000	2730000	2	2	1	2		49599	Oligodendrocyte-myelin glycoprotein OS=Mus musculus OX=10090 GN=Omg PE=1 SV=1
532	925	P11881|ITPR1_MOUSE	48.33	1	1	0	447000	607000	2	2	2	1	Carbamidomethylation	313166	Inositol 1 4 5-trisphosphate receptor type 1 OS=Mus musculus OX=10090 GN=Itpr1 PE=1 SV=2
855	1349	tr|A2A813|A2A813_MOUSE	48.19	14	14	0		573000	2	2	2	0	Carbamidomethylation	18474	Protein/nucleic acid deglycase DJ-1 OS=Mus musculus OX=10090 GN=Park7 PE=1 SV=1
855	1350	Q99LX0|PARK7_MOUSE	48.19	13	13	0		573000	2	2	2	0	Carbamidomethylation	20021	Protein/nucleic acid deglycase DJ-1 OS=Mus musculus OX=10090 GN=Park7 PE=1 SV=1
528	869	tr|A0A0J9YUM4|A0A0J9YUM4_MOUSE	47.43	5	5	3	1080000	2240000	2	2	2	1		37007	C-terminal-binding protein 1 OS=Mus musculus OX=10090 GN=Ctbp1 PE=1 SV=1
528	870	tr|A0A0J9YU62|A0A0J9YU62_MOUSE	47.43	4	4	2	1080000	2240000	2	2	2	1		46527	C-terminal-binding protein 1 OS=Mus musculus OX=10090 GN=Ctbp1 PE=1 SV=1
528	871	O88712|CTBP1_MOUSE	47.43	4	4	2	1080000	2240000	2	2	2	1		47745	C-terminal-binding protein 1 OS=Mus musculus OX=10090 GN=Ctbp1 PE=1 SV=2
701	1330	Q9R1P1|PSB3_MOUSE	46.6	8	5	8	1480000	544000	2	2	1	2	Carbamidomethylation	22965	Proteasome subunit beta type-3 OS=Mus musculus OX=10090 GN=Psmb3 PE=1 SV=1
699	1307	tr|A2AW41|A2AW41_MOUSE	46.46	6	6	3	1020000	2110000	2	2	2	1		30064	Heterogeneous nuclear ribonucleoprotein R (Fragment) OS=Mus musculus OX=10090 GN=Hnrnpr PE=1 SV=1
699	1308	tr|G3UZ48|G3UZ48_MOUSE	46.46	3	3	2	1020000	2110000	2	2	2	1		52062	Heterogeneous nuclear ribonucleoprotein Q OS=Mus musculus OX=10090 GN=Syncrip PE=1 SV=1
699	1309	tr|G3UZI2|G3UZI2_MOUSE	46.46	3	3	2	1020000	2110000	2	2	2	1		58752	Heterogeneous nuclear ribonucleoprotein Q OS=Mus musculus OX=10090 GN=Syncrip PE=1 SV=1
699	1310	tr|F7B5B5|F7B5B5_MOUSE	46.46	3	3	2	1020000	2110000	2	2	2	1		59626	Heterogeneous nuclear ribonucleoprotein R OS=Mus musculus OX=10090 GN=Hnrnpr PE=1 SV=1
699	1311	tr|A0A0R4J259|A0A0R4J259_MOUSE	46.46	3	3	1	1020000	2110000	2	2	2	1		62544	Heterogeneous nuclear ribonucleoprotein Q OS=Mus musculus OX=10090 GN=Syncrip PE=1 SV=1
699	1312	tr|G3V018|G3V018_MOUSE	46.46	3	3	1	1020000	2110000	2	2	2	1		65712	Heterogeneous nuclear ribonucleoprotein Q OS=Mus musculus OX=10090 GN=Syncrip PE=1 SV=1
699	1313	Q7TMK9|HNRPQ_MOUSE	46.46	3	3	1	1020000	2110000	2	2	2	1		69633	Heterogeneous nuclear ribonucleoprotein Q OS=Mus musculus OX=10090 GN=Syncrip PE=1 SV=2
699	1315	tr|Q8VHM5|Q8VHM5_MOUSE	46.46	3	3	1	1020000	2110000	2	2	2	1		70888	Heterogeneous nuclear ribonucleoprotein R OS=Mus musculus OX=10090 GN=Hnrnpr PE=1 SV=1
696	1281	tr|Q9D9P1|Q9D9P1_MOUSE	46.02	10	5	5	0	320000	2	2	1	1		20376	MICOS complex subunit OS=Mus musculus OX=10090 GN=Chchd3 PE=1 SV=1
696	1282	tr|D3Z0L4|D3Z0L4_MOUSE	46.02	9	4	5	0	320000	2	2	1	1		22452	MICOS complex subunit (Fragment) OS=Mus musculus OX=10090 GN=Chchd3 PE=1 SV=1
696	1284	Q9CRB9|MIC19_MOUSE	46.02	7	4	4	0	320000	2	2	1	1		26335	MICOS complex subunit Mic19 OS=Mus musculus OX=10090 GN=Chchd3 PE=1 SV=1
698	1291	Q99KJ8|DCTN2_MOUSE	45.86	5	3	5	698000	134000	2	2	1	2		44117	Dynactin subunit 2 OS=Mus musculus OX=10090 GN=Dctn2 PE=1 SV=3
849	1285	tr|A0A338P702|A0A338P702_MOUSE	45.73	21	0	21	489000		2	2	0	2		13173	Ubiquitin-conjugating enzyme E2 L3 OS=Mus musculus OX=10090 GN=Ube2l3 PE=1 SV=1
849	1286	tr|A0A338P7E5|A0A338P7E5_MOUSE	45.73	20	0	20	489000		2	2	0	2		14121	Ubiquitin-conjugating enzyme E2 L3 OS=Mus musculus OX=10090 GN=Ube2l3 PE=1 SV=1
849	1287	tr|A0A338P786|A0A338P786_MOUSE	45.73	16	0	16	489000		2	2	0	2		16940	Ubiquitin-conjugating enzyme E2 L3 (Fragment) OS=Mus musculus OX=10090 GN=Ube2l3 PE=1 SV=1
849	1288	P68037|UB2L3_MOUSE	45.73	16	0	16	489000		2	2	0	2		17862	Ubiquitin-conjugating enzyme E2 L3 OS=Mus musculus OX=10090 GN=Ube2l3 PE=1 SV=1
657	918	tr|Z4YKA3|Z4YKA3_MOUSE	45.2	4	2	2	0	0	2	2	1	1		56825	Heterochromatin protein 1-binding protein 3 OS=Mus musculus OX=10090 GN=Hp1bp3 PE=1 SV=1
657	920	Q3TEA8|HP1B3_MOUSE	45.2	4	2	2	0	0	2	2	1	1		60867	Heterochromatin protein 1-binding protein 3 OS=Mus musculus OX=10090 GN=Hp1bp3 PE=1 SV=1
657	919	tr|Z4YKB8|Z4YKB8_MOUSE	45.2	4	2	2	0	0	2	2	1	1		60851	Heterochromatin protein 1-binding protein 3 OS=Mus musculus OX=10090 GN=Hp1bp3 PE=1 SV=1
853	1320	tr|F6UFG6|F6UFG6_MOUSE	44.65	13	0	13	5790000		2	2	0	2	Carbamidomethylation	15425	Acidic leucine-rich nuclear phosphoprotein 32 family member A (Fragment) OS=Mus musculus OX=10090 GN=Anp32a PE=1 SV=1
853	1323	tr|D3YYE1|D3YYE1_MOUSE	44.65	9	0	9	5790000		2	2	0	2	Carbamidomethylation	22954	Acidic leucine-rich nuclear phosphoprotein 32 family member A (Fragment) OS=Mus musculus OX=10090 GN=Anp32a PE=1 SV=1
853	1324	tr|D3Z7M9|D3Z7M9_MOUSE	44.65	8	0	8	5790000		2	2	0	2	Carbamidomethylation	26861	Acidic leucine-rich nuclear phosphoprotein 32 family member A OS=Mus musculus OX=10090 GN=Anp32a PE=1 SV=1
853	1325	O35381|AN32A_MOUSE	44.65	7	0	7	5790000		2	2	0	2	Carbamidomethylation	28538	Acidic leucine-rich nuclear phosphoprotein 32 family member A OS=Mus musculus OX=10090 GN=Anp32a PE=1 SV=1
851	1301	tr|E9Q8N5|E9Q8N5_MOUSE	44.3	2	2	0		555000	2	2	2	0		140724	CLIP-associating protein 2 OS=Mus musculus OX=10090 GN=Clasp2 PE=1 SV=1
851	1300	Q8BRT1|CLAP2_MOUSE	44.3	2	2	0		555000	2	2	2	0		140738	CLIP-associating protein 2 OS=Mus musculus OX=10090 GN=Clasp2 PE=1 SV=1
851	1302	tr|Q08EB6|Q08EB6_MOUSE	44.3	2	2	0		555000	2	2	2	0		140881	CLIP-associating protein 2 OS=Mus musculus OX=10090 GN=Clasp2 PE=1 SV=1
851	1303	tr|Q08EB5|Q08EB5_MOUSE	44.3	2	2	0		555000	2	2	2	0		142515	CLIP-associating protein 2 OS=Mus musculus OX=10090 GN=Clasp2 PE=1 SV=1
851	1304	tr|F7DCH5|F7DCH5_MOUSE	44.3	2	2	0		555000	2	2	2	0		142850	CLIP-associating protein 2 OS=Mus musculus OX=10090 GN=Clasp2 PE=1 SV=1
852	1314	Q6IRU5|CLCB_MOUSE	44.04	9	4	4	846000	221000	2	2	1	1		25172	Clathrin light chain B OS=Mus musculus OX=10090 GN=Cltb PE=1 SV=1
702	1332	Q61792|LASP1_MOUSE	42.37	6	6	3	2290000	1650000	2	2	2	1		29994	LIM and SH3 domain protein 1 OS=Mus musculus OX=10090 GN=Lasp1 PE=1 SV=1
703	1339	tr|E9PUC5|E9PUC5_MOUSE	40.17	4	2	4	2580000	0	2	2	1	2		42300	PH and SEC7 domain-containing protein 3 OS=Mus musculus OX=10090 GN=Psd3 PE=1 SV=1
703	1340	tr|Q8C0E9|Q8C0E9_MOUSE	40.17	4	2	4	2580000	0	2	2	1	2		43761	PH and SEC7 domain-containing protein 3 OS=Mus musculus OX=10090 GN=Psd3 PE=1 SV=1
703	1344	tr|F6Z9E6|F6Z9E6_MOUSE	40.17	2	1	2	2580000	0	2	2	1	2		111296	PH and SEC7 domain-containing protein 3 OS=Mus musculus OX=10090 GN=Psd3 PE=1 SV=2
703	1345	tr|A0A1D5RLK2|A0A1D5RLK2_MOUSE	40.17	2	1	2	2580000	0	2	2	1	2		114536	PH and SEC7 domain-containing protein 3 OS=Mus musculus OX=10090 GN=Psd3 PE=1 SV=1
703	1346	Q2PFD7|PSD3_MOUSE	40.17	2	1	2	2580000	0	2	2	1	2		114722	PH and SEC7 domain-containing protein 3 OS=Mus musculus OX=10090 GN=Psd3 PE=1 SV=2
703	1347	tr|A0A1D5RMH7|A0A1D5RMH7_MOUSE	40.17	1	1	1	2580000	0	2	2	1	2		142027	PH and SEC7 domain-containing protein 3 OS=Mus musculus OX=10090 GN=Psd3 PE=1 SV=1
578	1333	tr|E0CZ27|E0CZ27_MOUSE	40.15	12	12	12	10500000	9740000	2	2	2	2		13322	Histone H3 (Fragment) OS=Mus musculus OX=10090 GN=H3f3a PE=3 SV=1
578	1334	tr|F8WI35|F8WI35_MOUSE	40.15	10	10	10	10500000	9740000	2	2	2	2		15199	Histone H3 OS=Mus musculus OX=10090 GN=H3f3a PE=1 SV=1
578	1338	P84228|H32_MOUSE	40.15	10	10	10	10500000	9740000	2	2	2	2		15388	Histone H3.2 OS=Mus musculus OX=10090 GN=Hist1h3b PE=1 SV=2
578	1337	P02301|H3C_MOUSE	40.15	10	10	10	10500000	9740000	2	2	2	2		15315	Histone H3.3C OS=Mus musculus OX=10090 GN=H3f3c PE=3 SV=3
578	1336	P84244|H33_MOUSE	40.15	10	10	10	10500000	9740000	2	2	2	2		15328	Histone H3.3 OS=Mus musculus OX=10090 GN=H3f3a PE=1 SV=2
578	1335	P68433|H31_MOUSE	40.15	10	10	10	10500000	9740000	2	2	2	2		15404	Histone H3.1 OS=Mus musculus OX=10090 GN=Hist1h3a PE=1 SV=2
578	1342	tr|A0A1W2P768|A0A1W2P768_MOUSE	40.15	8	8	8	10500000	9740000	2	2	2	2		20247	Histone H3.2 OS=Mus musculus OX=10090 GN=Hist2h3c1 PE=1 SV=1
704	1353	P20108|PRDX3_MOUSE	38.68	6	6	3	2480000	6010000	2	2	2	1		28127	Thioredoxin-dependent peroxide reductase mitochondrial OS=Mus musculus OX=10090 GN=Prdx3 PE=1 SV=1
2	10	Q7TMM9|TBB2A_MOUSE	264.72	53	53	50	58900000	1570000	24	1	56	56	Carbamidomethylation; Deamidation N; Oxidation (M)	49907	Tubulin beta-2A chain OS=Mus musculus OX=10090 GN=Tubb2a PE=1 SV=1
7	11	Q9CWF2|TBB2B_MOUSE	264.56	53	53	50	9500000	7420000	24	1	53	53	Carbamidomethylation; Deamidation N; Oxidation (M)	49953	Tubulin beta-2B chain OS=Mus musculus OX=10090 GN=Tubb2b PE=1 SV=1
6	27	P68369|TBA1A_MOUSE	263.06	51	48	51	244000	334000	23	1	52	51	Carbamidomethylation; Deamidation N; Ubiquitination-K	50136	Tubulin alpha-1A chain OS=Mus musculus OX=10090 GN=Tuba1a PE=1 SV=1
8	21	P68372|TBB4B_MOUSE	259.23	51	51	45	28400000	23200000	25	1	52	51	Carbamidomethylation; Deamidation N; Oxidation (M)	49831	Tubulin beta-4B chain OS=Mus musculus OX=10090 GN=Tubb4b PE=1 SV=1
27	36	P05064|ALDOA_MOUSE	203.63	50	50	44	30400000	27800000	20	1	31	30	Carbamidomethylation; Deamidation N	39356	Fructose-bisphosphate aldolase A OS=Mus musculus OX=10090 GN=Aldoa PE=1 SV=2
27	37	tr|A6ZI44|A6ZI44_MOUSE	203.63	44	44	38	30400000	27800000	20	1	31	30	Carbamidomethylation; Deamidation N	45120	Fructose-bisphosphate aldolase OS=Mus musculus OX=10090 GN=Aldoa PE=1 SV=1
80	81	tr|A0A0A6YY91|A0A0A6YY91_MOUSE	187.44	12	10	10		1770000	10	1	11	10	Carbamidomethylation; Phosphoserine (pS)	116375	Neural cell adhesion molecule 1 (Fragment) OS=Mus musculus OX=10090 GN=Ncam1 PE=1 SV=1
32	93	P68134|ACTS_MOUSE	181.12	29	25	25		0	13	1	27	29	Oxidation (M); HLys-Hex; Nitrotyrosine	42051	Actin alpha skeletal muscle OS=Mus musculus OX=10090 GN=Acta1 PE=1 SV=1
32	92	P68033|ACTC_MOUSE	181.12	29	25	25		0	13	1	27	29	Oxidation (M); HLys-Hex; Nitrotyrosine	42019	Actin alpha cardiac muscle 1 OS=Mus musculus OX=10090 GN=Actc1 PE=1 SV=1
137	170	tr|A0A0A6YY47|A0A0A6YY47_MOUSE	157.18	10	9	10	0	0	7	1	7	8	Carbamidomethylation; Deamidation N	93492	Neural cell adhesion molecule 1 OS=Mus musculus OX=10090 GN=Ncam1 PE=1 SV=1
137	171	tr|E9QB01|E9QB01_MOUSE	157.18	10	9	10	0	0	7	1	7	8	Carbamidomethylation; Deamidation N	93620	Neural cell adhesion molecule 1 OS=Mus musculus OX=10090 GN=Ncam1 PE=1 SV=2
182	156	tr|A1BN54|A1BN54_MOUSE	125.63	9	7	6		1340000	7	1	6	5		102720	Alpha actinin 1a OS=Mus musculus OX=10090 GN=Actn1 PE=1 SV=1
182	157	Q7TPR4|ACTN1_MOUSE	125.63	9	7	6		1340000	7	1	6	5		103068	Alpha-actinin-1 OS=Mus musculus OX=10090 GN=Actn1 PE=1 SV=1
230	679	tr|Q7M6W1|Q7M6W1_MOUSE	123.82	15	15	15	3090000	3430000	4	1	5	6		23558	Reticulon OS=Mus musculus OX=10090 GN=Rtn1 PE=1 SV=1
230	683	tr|A3QM89|A3QM89_MOUSE	123.82	12	12	12	3090000	3430000	4	1	5	6		28299	Reticulon (Fragment) OS=Mus musculus OX=10090 GN=Rtn1 PE=1 SV=1
201	444	P04104|K2C1_MOUSE	114.02	6	6	5	1320000	709000	5	1	5	4		65606	Keratin type II cytoskeletal 1 OS=Mus musculus OX=10090 GN=Krt1 PE=1 SV=4
161	407	Q8BFZ3|ACTBL_MOUSE	111.16	13	13	13	596000	621000	5	1	7	7	Deamidation N	42004	Beta-actin-like protein 2 OS=Mus musculus OX=10090 GN=Actbl2 PE=1 SV=1
435	650	P43274|H14_MOUSE	109.34	15	15	10	10500000	10500000	3	1	3	2		21977	Histone H1.4 OS=Mus musculus OX=10090 GN=Hist1h1e PE=1 SV=2
198	372	tr|Q5SVI9|Q5SVI9_MOUSE	107.32	13	13	6		1160000	5	1	6	4	Carbamidomethylation	54104	Calcium/calmodulin-dependent protein kinase type II subunit beta OS=Mus musculus OX=10090 GN=Camk2b PE=1 SV=1
198	373	tr|Q5SVJ1|Q5SVJ1_MOUSE	107.32	12	12	6		1160000	5	1	6	4	Carbamidomethylation	56453	Calcium/calmodulin-dependent protein kinase type II subunit beta OS=Mus musculus OX=10090 GN=Camk2b PE=1 SV=1
198	375	tr|Q5SVI0|Q5SVI0_MOUSE	107.32	12	12	6		1160000	5	1	6	4	Carbamidomethylation	58083	Calcium/calmodulin-dependent protein kinase type II subunit beta OS=Mus musculus OX=10090 GN=Camk2b PE=1 SV=1
198	374	tr|Q5SVI3|Q5SVI3_MOUSE	107.32	12	12	6		1160000	5	1	6	4	Carbamidomethylation	58111	Calcium/calmodulin-dependent protein kinase type II subunit beta OS=Mus musculus OX=10090 GN=Camk2b PE=1 SV=1
198	376	tr|Q5SVI2|Q5SVI2_MOUSE	107.32	11	11	6		1160000	5	1	6	4	Carbamidomethylation	59292	Calcium/calmodulin-dependent protein kinase type II subunit beta OS=Mus musculus OX=10090 GN=Camk2b PE=1 SV=1
198	377	P28652|KCC2B_MOUSE	107.32	11	11	6		1160000	5	1	6	4	Carbamidomethylation	60461	Calcium/calmodulin-dependent protein kinase type II subunit beta OS=Mus musculus OX=10090 GN=Camk2b PE=1 SV=2
198	378	tr|Q68EG2|Q68EG2_MOUSE	107.32	11	11	6		1160000	5	1	6	4	Carbamidomethylation	60676	Calcium/calmodulin-dependent protein kinase type II subunit beta OS=Mus musculus OX=10090 GN=Camk2b PE=1 SV=1
198	379	tr|Q5SVI1|Q5SVI1_MOUSE	107.32	10	10	5		1160000	5	1	6	4	Carbamidomethylation	65035	Calcium/calmodulin-dependent protein kinase type II subunit beta OS=Mus musculus OX=10090 GN=Camk2b PE=1 SV=1
198	381	tr|Q5SVJ0|Q5SVJ0_MOUSE	107.32	9	9	5		1160000	5	1	6	4	Carbamidomethylation	72903	Calcium/calmodulin-dependent protein kinase II beta isoform CRA_b OS=Mus musculus OX=10090 GN=Camk2b PE=1 SV=1
378	594	P15864|H12_MOUSE	102.7	15	15	10	5020000	5500000	3	1	3	2		21267	Histone H1.2 OS=Mus musculus OX=10090 GN=Hist1h1c PE=1 SV=2
168	1620	tr|V9GXQ2|V9GXQ2_MOUSE	100.78	8	8	7		691000	3	1	7	6		17596	Predicted gene 17087 OS=Mus musculus OX=10090 GN=Gm17087 PE=1 SV=1
304	600	tr|Q3TLP8|Q3TLP8_MOUSE	94.29	14	14	14	13300000	8020000	3	1	3	3	Carbamidomethylation	23432	RAS-related C3 botulinum substrate 1 isoform CRA_a OS=Mus musculus OX=10090 GN=Rac1 PE=1 SV=1
544	1012	O55042|SYUA_MOUSE	91.27	18	18	18	2060000	1930000	2	1	2	2		14485	Alpha-synuclein OS=Mus musculus OX=10090 GN=Snca PE=1 SV=2
464	892	tr|D3Z396|D3Z396_MOUSE	88.33	7	7	7	3240000	3270000	2	1	2	2		34955	Neurotrimin OS=Mus musculus OX=10090 GN=Ntm PE=1 SV=1
464	894	tr|Q8BG33|Q8BG33_MOUSE	88.33	7	7	7	3240000	3270000	2	1	2	2		37941	Neurotrimin OS=Mus musculus OX=10090 GN=Ntm PE=1 SV=1
464	893	Q99PJ0|NTRI_MOUSE	88.33	7	7	7	3240000	3270000	2	1	2	2		37984	Neurotrimin OS=Mus musculus OX=10090 GN=Ntm PE=1 SV=2
536	959	tr|A0A2R8VHN3|A0A2R8VHN3_MOUSE	86.81	15	8	15	2460000	2130000	2	1	1	2	Carbamidomethylation	17781	Poly(rC)-binding protein 2 (Fragment) OS=Mus musculus OX=10090 GN=Pcbp2 PE=1 SV=1
536	960	tr|A0A2R8VHG2|A0A2R8VHG2_MOUSE	86.81	13	8	13	2460000	2130000	2	1	1	2	Carbamidomethylation	19644	Poly(rC)-binding protein 2 (Fragment) OS=Mus musculus OX=10090 GN=Pcbp2 PE=1 SV=1
536	961	tr|A0A2R8VKF0|A0A2R8VKF0_MOUSE	86.81	13	7	13	2460000	2130000	2	1	1	2	Carbamidomethylation	20309	Poly(rC)-binding protein 2 (Fragment) OS=Mus musculus OX=10090 GN=Pcbp2 PE=1 SV=1
536	962	tr|A0A2R8VJY1|A0A2R8VJY1_MOUSE	86.81	12	7	12	2460000	2130000	2	1	1	2	Carbamidomethylation	21814	Poly(rC)-binding protein 2 (Fragment) OS=Mus musculus OX=10090 GN=Pcbp2 PE=1 SV=1
536	963	tr|A0A2R8W6L5|A0A2R8W6L5_MOUSE	86.81	11	6	11	2460000	2130000	2	1	1	2	Carbamidomethylation	23635	Poly(rC)-binding protein 2 (Fragment) OS=Mus musculus OX=10090 GN=Pcbp2 PE=1 SV=1
536	964	tr|E9Q7D8|E9Q7D8_MOUSE	86.81	11	6	11	2460000	2130000	2	1	1	2	Carbamidomethylation	24117	Poly(rC)-binding protein 3 OS=Mus musculus OX=10090 GN=Pcbp3 PE=1 SV=1
536	965	tr|A0A2R8VHZ0|A0A2R8VHZ0_MOUSE	86.81	11	6	11	2460000	2130000	2	1	1	2	Carbamidomethylation	24609	Poly(rC)-binding protein 2 (Fragment) OS=Mus musculus OX=10090 GN=Pcbp2 PE=1 SV=1
536	966	tr|A0A2R8VI71|A0A2R8VI71_MOUSE	86.81	10	6	10	2460000	2130000	2	1	1	2	Carbamidomethylation	25496	Poly(rC)-binding protein 2 (Fragment) OS=Mus musculus OX=10090 GN=Pcbp2 PE=1 SV=1
536	967	tr|A0A2R8VHY9|A0A2R8VHY9_MOUSE	86.81	10	6	10	2460000	2130000	2	1	1	2	Carbamidomethylation	26423	Poly(rC)-binding protein 2 (Fragment) OS=Mus musculus OX=10090 GN=Pcbp2 PE=1 SV=1
536	968	tr|A0A2R8VKN0|A0A2R8VKN0_MOUSE	86.81	10	6	10	2460000	2130000	2	1	1	2	Carbamidomethylation	26845	Poly(rC)-binding protein 2 (Fragment) OS=Mus musculus OX=10090 GN=Pcbp2 PE=1 SV=1
536	969	tr|A0A2R8VI73|A0A2R8VI73_MOUSE	86.81	9	5	9	2460000	2130000	2	1	1	2	Carbamidomethylation	28088	Poly(rC)-binding protein 2 (Fragment) OS=Mus musculus OX=10090 GN=Pcbp2 PE=1 SV=1
536	970	tr|A0A2R8VI12|A0A2R8VI12_MOUSE	86.81	9	5	9	2460000	2130000	2	1	1	2	Carbamidomethylation	29783	Poly(rC)-binding protein 2 (Fragment) OS=Mus musculus OX=10090 GN=Pcbp2 PE=1 SV=1
536	971	tr|A0A2R8VI25|A0A2R8VI25_MOUSE	86.81	8	4	8	2460000	2130000	2	1	1	2	Carbamidomethylation	33299	Poly(RC) binding protein 2 isoform CRA_d OS=Mus musculus OX=10090 GN=Pcbp2 PE=1 SV=1
536	972	tr|Q3TT81|Q3TT81_MOUSE	86.81	8	4	8	2460000	2130000	2	1	1	2	Carbamidomethylation	33926	Poly(rC)-binding protein 2 OS=Mus musculus OX=10090 GN=Pcbp2 PE=1 SV=1
536	973	tr|A0A2R8VHP9|A0A2R8VHP9_MOUSE	86.81	7	4	7	2460000	2130000	2	1	1	2	Carbamidomethylation	35347	Poly(rC)-binding protein 2 OS=Mus musculus OX=10090 GN=Pcbp2 PE=1 SV=1
536	975	tr|B2M1R7|B2M1R7_MOUSE	86.81	7	4	7	2460000	2130000	2	1	1	2	Carbamidomethylation	38151	Poly(rC)-binding protein 2 OS=Mus musculus OX=10090 GN=Pcbp2 PE=1 SV=1
536	976	Q61990|PCBP2_MOUSE	86.81	7	4	7	2460000	2130000	2	1	1	2	Carbamidomethylation	38222	Poly(rC)-binding protein 2 OS=Mus musculus OX=10090 GN=Pcbp2 PE=1 SV=1
536	977	P57722|PCBP3_MOUSE	86.81	7	4	7	2460000	2130000	2	1	1	2	Carbamidomethylation	39294	Poly(rC)-binding protein 3 OS=Mus musculus OX=10090 GN=Pcbp3 PE=1 SV=3
382	653	P61021|RAB5B_MOUSE	86.17	16	16	16	767000	633000	3	1	3	3		23707	Ras-related protein Rab-5B OS=Mus musculus OX=10090 GN=Rab5b PE=1 SV=1
333	563	tr|E9PVM7|E9PVM7_MOUSE	85.36	16	16	13	545000	663000	4	1	4	3	Carbamidomethylation	25504	Glutathione S-transferase (Fragment) OS=Mus musculus OX=10090 GN=Gstm5 PE=1 SV=1
333	564	P48774|GSTM5_MOUSE	85.36	16	16	12	545000	663000	4	1	4	3	Carbamidomethylation	26635	Glutathione S-transferase Mu 5 OS=Mus musculus OX=10090 GN=Gstm5 PE=1 SV=1
303	568	Q8VED5|K2C79_MOUSE	85.31	7	7	3		83100	5	1	5	3		57552	Keratin type II cytoskeletal 79 OS=Mus musculus OX=10090 GN=Krt79 PE=1 SV=2
302	562	Q3UV17|K22O_MOUSE	85.08	5	5	4	4750000	4260000	4	1	4	3	Carbamidomethylation	62845	Keratin type II cytoskeletal 2 oral OS=Mus musculus OX=10090 GN=Krt76 PE=1 SV=1
410	1075	tr|A2AEG3|A2AEG3_MOUSE	84.7	7	7	7	2770000	2400000	2	1	3	3	Carbamidomethylation	33515	Glycoprotein m6b isoform CRA_a OS=Mus musculus OX=10090 GN=Gpm6b PE=1 SV=1
410	1079	tr|A2AEG6|A2AEG6_MOUSE	84.7	6	6	6	2770000	2400000	2	1	3	3	Carbamidomethylation	36197	Glycoprotein m6b isoform CRA_g OS=Mus musculus OX=10090 GN=Gpm6b PE=1 SV=1
410	1078	P35803|GPM6B_MOUSE	84.7	6	6	6	2770000	2400000	2	1	3	3	Carbamidomethylation	36210	Neuronal membrane glycoprotein M6-b OS=Mus musculus OX=10090 GN=Gpm6b PE=1 SV=2
483	1293	tr|E9Q0F0|E9Q0F0_MOUSE	83.33	2	2	2	0	2960000	3	1	3	2		112265	Keratin 78 OS=Mus musculus OX=10090 GN=Krt78 PE=1 SV=1
274	766	Q6PHN9|RAB35_MOUSE	80.17	15	11	15	0		3	1	4	5		23025	Ras-related protein Rab-35 OS=Mus musculus OX=10090 GN=Rab35 PE=1 SV=1
721	1498	O70251|EF1B_MOUSE	78.93	7	7	7	262000	308000	1	1	1	1		24694	Elongation factor 1-beta OS=Mus musculus OX=10090 GN=Eef1b PE=1 SV=5
310	833	P68181|KAPCB_MOUSE	77.86	9	6	9	172000	207000	3	1	2	3		40708	cAMP-dependent protein kinase catalytic subunit beta OS=Mus musculus OX=10090 GN=Prkacb PE=1 SV=2
1384	1524	Q61016|GBG7_MOUSE	77.73	24	0	24	426000		1	1	0	1		7480	Guanine nucleotide-binding protein G(I)/G(S)/G(O) subunit gamma-7 OS=Mus musculus OX=10090 GN=Gng7 PE=1 SV=2
1384	1525	tr|G3X9Q2|G3X9Q2_MOUSE	77.73	23	0	23	426000		1	1	0	1		7611	Guanine nucleotide-binding protein subunit gamma OS=Mus musculus OX=10090 GN=Gng7 PE=1 SV=1
844	1204	P12382|PFKAL_MOUSE	77.55	3	0	3	1190000		2	1	0	2		85360	ATP-dependent 6-phosphofructokinase liver type OS=Mus musculus OX=10090 GN=Pfkl PE=1 SV=4
465	897	tr|G5E8R0|G5E8R0_MOUSE	77.14	9	9	9	1820000	1480000	2	1	2	2		28343	Tropomyosin 1 alpha isoform CRA_i OS=Mus musculus OX=10090 GN=Tpm1 PE=1 SV=1
465	898	tr|G5E8R1|G5E8R1_MOUSE	77.14	9	9	9	1820000	1480000	2	1	2	2		28557	Tropomyosin 1 alpha isoform CRA_j OS=Mus musculus OX=10090 GN=Tpm1 PE=1 SV=1
465	899	tr|E9Q455|E9Q455_MOUSE	77.14	9	9	9	1820000	1480000	2	1	2	2		28748	Tropomyosin alpha-1 chain OS=Mus musculus OX=10090 GN=Tpm1 PE=1 SV=1
875	1539	tr|E0CY16|E0CY16_MOUSE	77.13	3	3	3	692000	647000	1	1	1	1		42892	Cell adhesion molecule 1 OS=Mus musculus OX=10090 GN=Cadm1 PE=1 SV=1
875	1540	Q8R5M8|CADM1_MOUSE	77.13	3	3	3	692000	647000	1	1	1	1		49789	Cell adhesion molecule 1 OS=Mus musculus OX=10090 GN=Cadm1 PE=1 SV=2
875	1541	tr|E9PYN1|E9PYN1_MOUSE	77.13	3	3	3	692000	647000	1	1	1	1		51689	Cell adhesion molecule 1 OS=Mus musculus OX=10090 GN=Cadm1 PE=1 SV=1
872	1526	O55022|PGRC1_MOUSE	77.12	7	7	7	1550000	1340000	1	1	1	1		21694	Membrane-associated progesterone receptor component 1 OS=Mus musculus OX=10090 GN=Pgrmc1 PE=1 SV=4
874	1537	tr|A0A0R3P9C8|A0A0R3P9C8_MOUSE	76.58	4	4	4	2670000	1950000	1	1	1	1		42122	NADH dehydrogenase [ubiquinone] 1 alpha subcomplex subunit 9 mitochondrial OS=Mus musculus OX=10090 GN=Ndufa9 PE=1 SV=1
874	1538	Q9DC69|NDUA9_MOUSE	76.58	4	4	4	2670000	1950000	1	1	1	1		42525	NADH dehydrogenase [ubiquinone] 1 alpha subcomplex subunit 9 mitochondrial OS=Mus musculus OX=10090 GN=Ndufa9 PE=1 SV=2
457	842	P80316|TCPE_MOUSE	76.18	4	4	4	2570000	2120000	2	1	2	2	Carbamidomethylation	59624	T-complex protein 1 subunit epsilon OS=Mus musculus OX=10090 GN=Cct5 PE=1 SV=1
666	1030	P11983|TCPA_MOUSE	76.15	5	2	5	1130000	1410000	2	1	1	2		60449	T-complex protein 1 subunit alpha OS=Mus musculus OX=10090 GN=Tcp1 PE=1 SV=3
873	1530	P63213|GBG2_MOUSE	74.98	23	23	23	1490000	1570000	1	1	1	1		7850	Guanine nucleotide-binding protein G(I)/G(S)/G(O) subunit gamma-2 OS=Mus musculus OX=10090 GN=Gng2 PE=1 SV=2
471	926	Q8JZQ2|AFG32_MOUSE	74.6	3	3	3	139000	180000	2	1	2	2		89519	AFG3-like protein 2 OS=Mus musculus OX=10090 GN=Afg3l2 PE=1 SV=1
548	1048	tr|E9PZF0|E9PZF0_MOUSE	73.43	7	7	7	1860000	1670000	2	1	2	2		30200	Nucleoside diphosphate kinase OS=Mus musculus OX=10090 GN=Gm20390 PE=3 SV=1
454	834	P05132|KAPCA_MOUSE	72.58	9	6	5		243000	3	1	2	2		40571	cAMP-dependent protein kinase catalytic subunit alpha OS=Mus musculus OX=10090 GN=Prkaca PE=1 SV=3
309	784	P03995|GFAP_MOUSE	72.55	6	4	6	2350000	1910000	3	1	2	3		49900	Glial fibrillary acidic protein OS=Mus musculus OX=10090 GN=Gfap PE=1 SV=4
314	1268	Q9D0M5|DYL2_MOUSE	71.85	20	20	20	13300000	11800000	2	1	3	3		10350	Dynein light chain 2 cytoplasmic OS=Mus musculus OX=10090 GN=Dynll2 PE=1 SV=1
718	1485	O89053|COR1A_MOUSE	71.41	3	3	3	906000	1110000	1	1	1	1		50989	Coronin-1A OS=Mus musculus OX=10090 GN=Coro1a PE=1 SV=5
864	1443	tr|F7C0H6|F7C0H6_MOUSE	71.41	9	0	9	1260000		1	1	0	1		20726	CB1 cannabinoid receptor-interacting protein 1 (Fragment) OS=Mus musculus OX=10090 GN=Cnrip1 PE=1 SV=1
413	1290	P63168|DYL1_MOUSE	70.79	20	20	20	1740000	2000000	2	1	3	3		10366	Dynein light chain 1 cytoplasmic OS=Mus musculus OX=10090 GN=Dynll1 PE=1 SV=1
474	930	Q80SW1|SAHH2_MOUSE	69.64	4	4	2		279000000	2	1	2	2		58952	S-adenosylhomocysteine hydrolase-like protein 1 OS=Mus musculus OX=10090 GN=Ahcyl1 PE=1 SV=1
1385	1549	P62774|MTPN_MOUSE	67.37	14	14	0		1240000	1	1	1	0		12861	Myotrophin OS=Mus musculus OX=10090 GN=Mtpn PE=1 SV=2
553	1085	tr|D3Z6I8|D3Z6I8_MOUSE	66.52	9	9	9	1870000	1760000	2	1	2	2		28723	Tropomyosin alpha-3 chain OS=Mus musculus OX=10090 GN=Tpm3 PE=1 SV=1
553	1086	tr|E9Q7Q3|E9Q7Q3_MOUSE	66.52	9	9	9	1870000	1760000	2	1	2	2		28734	Tropomyosin alpha-3 chain OS=Mus musculus OX=10090 GN=Tpm3 PE=1 SV=1
730	1553	Q60771|CLD11_MOUSE	65.39	7	7	7	0	12500000	1	1	2	1		22114	Claudin-11 OS=Mus musculus OX=10090 GN=Cldn11 PE=1 SV=1
1386	1556	Q05920|PYC_MOUSE	64.39	1	0	1	1260000		1	1	0	1		129684	Pyruvate carboxylase mitochondrial OS=Mus musculus OX=10090 GN=Pc PE=1 SV=1
1386	1555	tr|G5E8R3|G5E8R3_MOUSE	64.39	1	0	1	1260000		1	1	0	1		129701	Pyruvate carboxylase OS=Mus musculus OX=10090 GN=Pcx PE=1 SV=1
1386	1557	tr|E9QPD7|E9QPD7_MOUSE	64.39	1	0	1	1260000		1	1	0	1		129832	Pyruvate carboxylase OS=Mus musculus OX=10090 GN=Pcx PE=1 SV=1
876	1560	P84086|CPLX2_MOUSE	63.96	11	11	11	4510000	3750000	1	1	1	1	Carbamidomethylation	15394	Complexin-2 OS=Mus musculus OX=10090 GN=Cplx2 PE=1 SV=1
555	1094	tr|Q9D034|Q9D034_MOUSE	63.73	12	12	12	132000	131000	2	1	2	2		19937	Guanine nucleotide-binding protein subunit alpha-13 OS=Mus musculus OX=10090 GN=Gna13 PE=1 SV=1
555	1096	P27601|GNA13_MOUSE	63.73	6	6	6	132000	131000	2	1	2	2		44055	Guanine nucleotide-binding protein subunit alpha-13 OS=Mus musculus OX=10090 GN=Gna13 PE=1 SV=1
561	1139	tr|D3Z2H9|D3Z2H9_MOUSE	62.67	8	8	8	4660000	4450000	2	1	2	2		28992	Tropomyosin 3 related sequence 7 OS=Mus musculus OX=10090 GN=Tpm3-rs7 PE=3 SV=1
561	1141	tr|E9Q5J9|E9Q5J9_MOUSE	62.67	7	7	7	4660000	4450000	2	1	2	2		33281	Tropomyosin alpha-3 chain OS=Mus musculus OX=10090 GN=Tpm3 PE=1 SV=1
883	1618	P54823|DDX6_MOUSE	61.92	2	2	2	0	124000	1	1	1	1		54192	Probable ATP-dependent RNA helicase DDX6 OS=Mus musculus OX=10090 GN=Ddx6 PE=1 SV=1
679	1148	tr|Q5NC80|Q5NC80_MOUSE	61.53	16	8	16	442000		2	1	1	2		14092	Nucleoside diphosphate kinase (Fragment) OS=Mus musculus OX=10090 GN=Nme1 PE=1 SV=1
679	1149	P15532|NDKA_MOUSE	61.53	13	7	13	442000		2	1	1	2		17208	Nucleoside diphosphate kinase A OS=Mus musculus OX=10090 GN=Nme1 PE=1 SV=1
877	1577	P02802|MT1_MOUSE	61.08	20	20	20	185000	149000	1	1	1	1	Carbamidomethylation	6018	Metallothionein-1 OS=Mus musculus OX=10090 GN=Mt1 PE=1 SV=1
879	1592	Q9QYJ0|DNJA2_MOUSE	59.73	3	3	3	281000	222000	1	1	1	1	Carbamidomethylation	45746	DnaJ homolog subfamily A member 2 OS=Mus musculus OX=10090 GN=Dnaja2 PE=1 SV=1
878	1588	tr|F6U6Z2|F6U6Z2_MOUSE	59.43	6	6	6	0	0	1	1	1	1		24380	Phytanoyl-CoA hydroxylase-interacting protein-like (Fragment) OS=Mus musculus OX=10090 GN=Phyhipl PE=1 SV=1
878	1590	tr|F7D3N3|F7D3N3_MOUSE	59.43	4	4	4	0	0	1	1	1	1		37475	Phytanoyl-CoA hydroxylase-interacting protein-like OS=Mus musculus OX=10090 GN=Phyhipl PE=1 SV=1
878	1591	Q8BGT8|PHIPL_MOUSE	59.43	3	3	3	0	0	1	1	1	1		42341	Phytanoyl-CoA hydroxylase-interacting protein-like OS=Mus musculus OX=10090 GN=Phyhipl PE=1 SV=1
278	1163	Q8CHH9|SEPT8_MOUSE	58.6	5	2	5	0		2	1	4	5	Carbamidomethylation	49812	Septin-8 OS=Mus musculus OX=10090 GN=Sept8 PE=1 SV=4
278	1165	tr|B7ZC46|B7ZC46_MOUSE	58.6	5	2	5	0		2	1	4	5	Carbamidomethylation	50896	Septin-8 OS=Mus musculus OX=10090 GN=Sept8 PE=1 SV=1
278	1166	tr|B1AQY9|B1AQY9_MOUSE	58.6	5	2	5	0		2	1	4	5	Carbamidomethylation	51146	Septin-8 OS=Mus musculus OX=10090 GN=Sept8 PE=1 SV=1
278	1167	tr|B1AQZ0|B1AQZ0_MOUSE	58.6	4	2	4	0		2	1	4	5	Carbamidomethylation	55874	Septin-8 OS=Mus musculus OX=10090 GN=Sept8 PE=1 SV=1
887	1639	tr|Q3TS02|Q3TS02_MOUSE	58.32	2	2	2	332000	0	1	1	1	1	Carbamidomethylation	53705	ATP-citrate synthase OS=Mus musculus OX=10090 GN=Acly PE=1 SV=1
887	1688	Q91V92|ACLY_MOUSE	58.32	1	1	1	332000	0	1	1	1	1	Carbamidomethylation	119728	ATP-citrate synthase OS=Mus musculus OX=10090 GN=Acly PE=1 SV=1
887	1689	tr|Q3V117|Q3V117_MOUSE	58.32	1	1	1	332000	0	1	1	1	1	Carbamidomethylation	120795	ATP-citrate synthase OS=Mus musculus OX=10090 GN=Acly PE=1 SV=1
880	1594	Q62433|NDRG1_MOUSE	58.06	4	4	4	339000	441000	1	1	1	1		43009	Protein NDRG1 OS=Mus musculus OX=10090 GN=Ndrg1 PE=1 SV=1
888	1640	tr|F7BX26|F7BX26_MOUSE	57.6	2	2	2	285000	310000	1	1	1	1		54324	Serine/threonine-protein phosphatase (Fragment) OS=Mus musculus OX=10090 GN=Ppp5c PE=1 SV=1
888	1641	Q60676|PPP5_MOUSE	57.6	2	2	2	285000	310000	1	1	1	1		56877	Serine/threonine-protein phosphatase 5 OS=Mus musculus OX=10090 GN=Ppp5c PE=1 SV=3
882	1602	O55234|PSB5_MOUSE	57.48	5	5	5	527000	536000	1	1	1	1		28532	Proteasome subunit beta type-5 OS=Mus musculus OX=10090 GN=Psmb5 PE=1 SV=3
885	1624	tr|D3YX34|D3YX34_MOUSE	56.9	1	1	1	356000	356000	1	1	1	1		126821	Dynactin subunit 1 OS=Mus musculus OX=10090 GN=Dctn1 PE=1 SV=1
885	1626	tr|E9Q586|E9Q586_MOUSE	56.9	1	1	1	356000	356000	1	1	1	1		136848	Dynactin subunit 1 OS=Mus musculus OX=10090 GN=Dctn1 PE=1 SV=1
885	1627	tr|E9Q3M3|E9Q3M3_MOUSE	56.9	1	1	1	356000	356000	1	1	1	1		139761	Dynactin subunit 1 OS=Mus musculus OX=10090 GN=Dctn1 PE=1 SV=1
885	1628	O08788|DCTN1_MOUSE	56.9	1	1	1	356000	356000	1	1	1	1		141675	Dynactin subunit 1 OS=Mus musculus OX=10090 GN=Dctn1 PE=1 SV=3
1388	1614	tr|Q921L6|Q921L6_MOUSE	56.89	2	2	0		1070000	1	1	1	0		57086	Cortactin isoform CRA_a OS=Mus musculus OX=10090 GN=Cttn PE=1 SV=1
1388	1617	Q60598|SRC8_MOUSE	56.89	2	2	0		1070000	1	1	1	0		61250	Src substrate cortactin OS=Mus musculus OX=10090 GN=Cttn PE=1 SV=2
597	1606	tr|D3Z563|D3Z563_MOUSE	56.65	29	29	29	5630000	6150000	1	1	1	1		7237	Acyl-CoA-binding protein OS=Mus musculus OX=10090 GN=Dbi PE=1 SV=1
597	1607	P31786|ACBP_MOUSE	56.65	21	21	21	5630000	6150000	1	1	1	1		10000	Acyl-CoA-binding protein OS=Mus musculus OX=10090 GN=Dbi PE=1 SV=2
597	1608	tr|Q4VWZ5|Q4VWZ5_MOUSE	56.65	13	13	13	5630000	6150000	1	1	1	1		15229	Acyl-CoA-binding protein OS=Mus musculus OX=10090 GN=Dbi PE=1 SV=1
881	1597	tr|A0A2R8VHE5|A0A2R8VHE5_MOUSE	56.63	24	24	24	130000	126000	1	1	1	1		6316	3-mercaptopyruvate sulfurtransferase (Fragment) OS=Mus musculus OX=10090 GN=Mpst PE=1 SV=1
881	1601	tr|A0A2R8VHT1|A0A2R8VHT1_MOUSE	56.63	8	8	8	130000	126000	1	1	1	1		18977	3-mercaptopyruvate sulfurtransferase (Fragment) OS=Mus musculus OX=10090 GN=Mpst PE=1 SV=1
881	1605	Q99J99|THTM_MOUSE	56.63	4	4	4	130000	126000	1	1	1	1		33097	3-mercaptopyruvate sulfurtransferase OS=Mus musculus OX=10090 GN=Mpst PE=1 SV=4
1387	1599	P62900|RL31_MOUSE	56.58	11	11	0		118000	1	1	1	0		14463	60S ribosomal protein L31 OS=Mus musculus OX=10090 GN=Rpl31 PE=1 SV=1
1387	1600	tr|A0A0A6YX26|A0A0A6YX26_MOUSE	56.58	11	11	0		118000	1	1	1	0		14997	60S ribosomal protein L31 OS=Mus musculus OX=10090 GN=Rpl31 PE=1 SV=1
732	1604	P00416|COX3_MOUSE	56.44	5	5	5	4070000	13100000	1	1	2	1		29923	Cytochrome c oxidase subunit 3 OS=Mus musculus OX=10090 GN=mt-Co3 PE=1 SV=2
884	1621	Q64133|AOFA_MOUSE	55.85	2	2	2	477000	455000	1	1	1	1		59602	Amine oxidase [flavin-containing] A OS=Mus musculus OX=10090 GN=Maoa PE=1 SV=3
1389	1622	D3YVF0|AKAP5_MOUSE	55.74	2	0	2	340000		1	1	0	1		79397	A-kinase anchor protein 5 OS=Mus musculus OX=10090 GN=Akap5 PE=1 SV=2
1389	1623	tr|H3BIV5|H3BIV5_MOUSE	55.74	2	0	2	340000		1	1	0	1		80203	A-kinase anchor protein 5 OS=Mus musculus OX=10090 GN=Akap5 PE=1 SV=1
886	1634	tr|A0A1Y7VM65|A0A1Y7VM65_MOUSE	55.4	13	13	13	834000	898000	1	1	1	1		9387	Glutaredoxin-1 OS=Mus musculus OX=10090 GN=Glrx PE=1 SV=1
886	1635	Q9QUH0|GLRX1_MOUSE	55.4	10	10	10	834000	898000	1	1	1	1		11871	Glutaredoxin-1 OS=Mus musculus OX=10090 GN=Glrx PE=1 SV=3
1390	1631	tr|A0A2I3BQF4|A0A2I3BQF4_MOUSE	55.12	13	13	0		540000	1	1	1	0	Carbamidomethylation	10457	60S ribosomal protein L30 OS=Mus musculus OX=10090 GN=Rpl30 PE=1 SV=1
1390	1633	P62889|RL30_MOUSE	55.12	10	10	0		540000	1	1	1	0	Carbamidomethylation	12784	60S ribosomal protein L30 OS=Mus musculus OX=10090 GN=Rpl30 PE=1 SV=2
889	1644	tr|D3Z629|D3Z629_MOUSE	54.55	7	7	7	984000	789000	1	1	1	1	Carbamidomethylation	19091	60S ribosomal protein L9 OS=Mus musculus OX=10090 GN=Rpl9 PE=1 SV=1
889	1646	tr|S4R1R7|S4R1R7_MOUSE	54.55	6	6	6	984000	789000	1	1	1	1	Carbamidomethylation	21992	MCG50795 OS=Mus musculus OX=10090 GN=Rpl9-ps1 PE=4 SV=1
889	1645	tr|A0A0G2JES3|A0A0G2JES3_MOUSE	54.55	6	6	6	984000	789000	1	1	1	1	Carbamidomethylation	21741	60S ribosomal protein L9 (Fragment) OS=Mus musculus OX=10090 GN=Rpl9 PE=1 SV=1
889	1648	tr|A0A140T8T4|A0A140T8T4_MOUSE	54.55	6	6	6	984000	789000	1	1	1	1	Carbamidomethylation	21853	Ribosomal protein L9 pseudogene 6 OS=Mus musculus OX=10090 GN=Rpl9-ps6 PE=4 SV=1
889	1647	P51410|RL9_MOUSE	54.55	6	6	6	984000	789000	1	1	1	1	Carbamidomethylation	21881	60S ribosomal protein L9 OS=Mus musculus OX=10090 GN=Rpl9 PE=2 SV=2
1392	1665	Q9ESW4|AGK_MOUSE	54.07	3	3	0		407000	1	1	1	0		46976	Acylglycerol kinase mitochondrial OS=Mus musculus OX=10090 GN=Agk PE=1 SV=1
891	1679	Q9JKD3|SCAM5_MOUSE	53.98	5	5	5	2940000	2660000	1	1	1	1		26068	Secretory carrier-associated membrane protein 5 OS=Mus musculus OX=10090 GN=Scamp5 PE=1 SV=1
592	1466	Q8VDM4|PSMD2_MOUSE	53.9	1	1	1	312000	250000	1	1	1	1		100203	26S proteasome non-ATPase regulatory subunit 2 OS=Mus musculus OX=10090 GN=Psmd2 PE=1 SV=1
890	1649	P10639|THIO_MOUSE	53.71	12	12	12	2900000	2450000	1	1	1	1		11675	Thioredoxin OS=Mus musculus OX=10090 GN=Txn PE=1 SV=3
1391	1662	tr|E9Q4M4|E9Q4M4_MOUSE	53.18	7	0	7	331000		1	1	0	1		26388	MICOS complex subunit OS=Mus musculus OX=10090 GN=Chchd6 PE=1 SV=1
1391	1663	Q91VN4|MIC25_MOUSE	53.18	6	0	6	331000		1	1	0	1		29852	MICOS complex subunit Mic25 OS=Mus musculus OX=10090 GN=Chchd6 PE=1 SV=2
1393	1666	Q9WV55|VAPA_MOUSE	53.04	6	0	6	2120000		1	1	0	1		27855	Vesicle-associated membrane protein-associated protein A OS=Mus musculus OX=10090 GN=Vapa PE=1 SV=2
727	1675	tr|D3Z1H8|D3Z1H8_MOUSE	52.83	7	7	7	0	419000	1	1	1	1	Carbamidomethylation	20275	Glycolipid transfer protein OS=Mus musculus OX=10090 GN=Gltp PE=1 SV=1
727	1676	tr|D3Z1H9|D3Z1H9_MOUSE	52.83	6	6	6	0	419000	1	1	1	1	Carbamidomethylation	21535	Glycolipid transfer protein OS=Mus musculus OX=10090 GN=Gltp PE=1 SV=1
727	1678	Q9JL62|GLTP_MOUSE	52.83	6	6	6	0	419000	1	1	1	1	Carbamidomethylation	23690	Glycolipid transfer protein OS=Mus musculus OX=10090 GN=Gltp PE=1 SV=3
1394	1683	Q9CPY7|AMPL_MOUSE	52.19	2	2	0		0	1	1	1	0		56141	Cytosol aminopeptidase OS=Mus musculus OX=10090 GN=Lap3 PE=1 SV=3
729	1690	tr|E9QMK2|E9QMK2_MOUSE	51.94	1	1	0		664000	1	1	1	0		178498	Versican core protein OS=Mus musculus OX=10090 GN=Vcan PE=1 SV=1
729	1705	tr|E9PYH0|E9PYH0_MOUSE	51.94	0	0	0		664000	1	1	1	0		366895	Versican core protein OS=Mus musculus OX=10090 GN=Vcan PE=1 SV=1
729	1706	Q62059|CSPG2_MOUSE	51.94	0	0	0		664000	1	1	1	0		366788	Versican core protein OS=Mus musculus OX=10090 GN=Vcan PE=1 SV=2
894	1730	tr|E9Q0X0|E9Q0X0_MOUSE	51.9	7	7	7	233000	0	1	1	1	1		15700	Proteasome subunit alpha type (Fragment) OS=Mus musculus OX=10090 GN=Psma4 PE=1 SV=1
894	1741	tr|E9PW69|E9PW69_MOUSE	51.9	5	5	5	233000	0	1	1	1	1		23385	Proteasome subunit alpha type (Fragment) OS=Mus musculus OX=10090 GN=Psma4 PE=1 SV=1
894	1744	Q9R1P0|PSA4_MOUSE	51.9	4	4	4	233000	0	1	1	1	1		29471	Proteasome subunit alpha type-4 OS=Mus musculus OX=10090 GN=Psma4 PE=1 SV=1
1395	1691	Q5FWK3|RHG01_MOUSE	51.67	3	3	0		456000	1	1	1	0		50411	Rho GTPase-activating protein 1 OS=Mus musculus OX=10090 GN=Arhgap1 PE=1 SV=1
1395	1694	tr|A2AH25|A2AH25_MOUSE	51.67	2	2	0		456000	1	1	1	0		54437	Rho GTPase-activating protein 1 OS=Mus musculus OX=10090 GN=Arhgap1 PE=1 SV=1
1396	1696	Q99L04|DHRS1_MOUSE	51.46	4	0	4	431000		1	1	0	1		34005	Dehydrogenase/reductase SDR family member 1 OS=Mus musculus OX=10090 GN=Dhrs1 PE=1 SV=1
459	855	Q9Z2I0|LETM1_MOUSE	51.34	2	1	2	452000		2	1	1	2		82989	Mitochondrial proton/calcium exchanger protein OS=Mus musculus OX=10090 GN=Letm1 PE=1 SV=1
892	1697	tr|B7ZCD3|B7ZCD3_MOUSE	51.24	14	14	14	399000	383000	1	1	1	1		9696	Neural cell adhesion molecule L1 (Fragment) OS=Mus musculus OX=10090 GN=L1cam PE=1 SV=8
892	1721	tr|A2AFG7|A2AFG7_MOUSE	51.24	1	1	1	399000	383000	1	1	1	1		139822	Neural cell adhesion molecule L1 OS=Mus musculus OX=10090 GN=L1cam PE=1 SV=1
892	1722	tr|A2AFG8|A2AFG8_MOUSE	51.24	1	1	1	399000	383000	1	1	1	1		140431	Neural cell adhesion molecule L1 OS=Mus musculus OX=10090 GN=L1cam PE=1 SV=1
892	1723	tr|Q6PGJ3|Q6PGJ3_MOUSE	51.24	1	1	1	399000	383000	1	1	1	1		140916	L1 cell adhesion molecule OS=Mus musculus OX=10090 GN=L1cam PE=1 SV=1
892	1724	P11627|L1CAM_MOUSE	51.24	1	1	1	399000	383000	1	1	1	1		140968	Neural cell adhesion molecule L1 OS=Mus musculus OX=10090 GN=L1cam PE=1 SV=1
1397	1698	tr|D3YYM6|D3YYM6_MOUSE	51.18	7	0	7	250000		1	1	0	1	Carbamidomethylation	20414	40S ribosomal protein S5 (Fragment) OS=Mus musculus OX=10090 GN=Rps5 PE=1 SV=1
1397	1699	tr|D3Z1S8|D3Z1S8_MOUSE	51.18	7	0	7	250000		1	1	0	1	Carbamidomethylation	21080	40S ribosomal protein S5 (Fragment) OS=Mus musculus OX=10090 GN=Rps5 PE=1 SV=1
1397	1701	P97461|RS5_MOUSE	51.18	6	0	6	250000		1	1	0	1	Carbamidomethylation	22889	40S ribosomal protein S5 OS=Mus musculus OX=10090 GN=Rps5 PE=1 SV=3
1397	1700	tr|Q91V55|Q91V55_MOUSE	51.18	6	0	6	250000		1	1	0	1	Carbamidomethylation	22876	40S ribosomal protein S5 OS=Mus musculus OX=10090 GN=Rps5 PE=1 SV=1
893	1729	tr|E9PY26|E9PY26_MOUSE	50.83	6	6	6	0	0	1	1	1	1		20909	Bleomycin hydrolase (Fragment) OS=Mus musculus OX=10090 GN=Blmh PE=1 SV=1
893	1736	Q8R016|BLMH_MOUSE	50.83	2	2	2	0	0	1	1	1	1		52511	Bleomycin hydrolase OS=Mus musculus OX=10090 GN=Blmh PE=1 SV=1
905	1843	Q5EBJ4|ERMIN_MOUSE	50.68	3	3	3	448000	423000	1	1	1	1		32148	Ermin OS=Mus musculus OX=10090 GN=Ermn PE=1 SV=1
1398	1704	P56375|ACYP2_MOUSE	50.64	12	0	12	405000		1	1	0	1		11878	Acylphosphatase-2 OS=Mus musculus OX=10090 GN=Acyp2 PE=1 SV=2
1399	1707	tr|D3Z7I9|D3Z7I9_MOUSE	50.11	9	9	0		400000	1	1	1	0		20660	Oxysterol-binding protein (Fragment) OS=Mus musculus OX=10090 GN=Osbpl1a PE=1 SV=1
1399	1708	tr|A0A3Q4L2S6|A0A3Q4L2S6_MOUSE	50.11	8	8	0		400000	1	1	1	0		22874	Oxysterol-binding protein (Fragment) OS=Mus musculus OX=10090 GN=Osbpl1a PE=1 SV=1
1399	1709	tr|D3Z754|D3Z754_MOUSE	50.11	6	6	0		400000	1	1	1	0		31815	Oxysterol-binding protein (Fragment) OS=Mus musculus OX=10090 GN=Osbpl1a PE=1 SV=2
1399	1710	tr|A0A3Q4EG54|A0A3Q4EG54_MOUSE	50.11	3	3	0		400000	1	1	1	0		60160	Oxysterol-binding protein OS=Mus musculus OX=10090 GN=Osbpl1a PE=1 SV=1
1399	1711	tr|A0A3Q4EI24|A0A3Q4EI24_MOUSE	50.11	3	3	0		400000	1	1	1	0		62169	Oxysterol-binding protein OS=Mus musculus OX=10090 GN=Osbpl1a PE=1 SV=1
1399	1712	tr|Q3V156|Q3V156_MOUSE	50.11	3	3	0		400000	1	1	1	0		63434	Oxysterol-binding protein OS=Mus musculus OX=10090 GN=Osbpl1a PE=1 SV=1
1399	1713	Q91XL9|OSBL1_MOUSE	50.11	2	2	0		400000	1	1	1	0		107795	Oxysterol-binding protein-related protein 1 OS=Mus musculus OX=10090 GN=Osbpl1a PE=1 SV=2
416	1437	Q920I9|WDR7_MOUSE	50.01	1	1	0		326000	1	1	1	0	Carbamidomethylation	163449	WD repeat-containing protein 7 OS=Mus musculus OX=10090 GN=Wdr7 PE=1 SV=3
860	1416	P63137|GBRB2_MOUSE	49.95	2	0	2	790000		1	1	0	1		59197	Gamma-aminobutyric acid receptor subunit beta-2 OS=Mus musculus OX=10090 GN=Gabrb2 PE=1 SV=2
599	1727	P28184|MT3_MOUSE	49.91	18	18	18	783000	733000	1	1	2	2	Carbamidomethylation	7009	Metallothionein-3 OS=Mus musculus OX=10090 GN=Mt3 PE=1 SV=1
1400	1725	tr|F8WHP8|F8WHP8_MOUSE	49.77	16	0	16	6400000		1	1	0	1		9006	ATP synthase H+-transporting mitochondrial F0 complex subunit F2 OS=Mus musculus OX=10090 GN=Atp5j2 PE=1 SV=1
1400	1726	P56135|ATPK_MOUSE	49.77	14	0	14	6400000		1	1	0	1		10344	ATP synthase subunit f mitochondrial OS=Mus musculus OX=10090 GN=Atp5mf PE=1 SV=3
846	1264	tr|A2AUK7|A2AUK7_MOUSE	49.59	2	0	2	1640000		2	1	0	2		81891	Band 4.1-like protein 1 OS=Mus musculus OX=10090 GN=Epb41l1 PE=1 SV=1
846	1265	tr|A2AUK8|A2AUK8_MOUSE	49.59	2	0	2	1640000		2	1	0	2		96853	Band 4.1-like protein 1 OS=Mus musculus OX=10090 GN=Epb41l1 PE=1 SV=1
846	1267	tr|A2AUK5|A2AUK5_MOUSE	49.59	2	0	2	1640000		2	1	0	2		98315	Band 4.1-like protein 1 OS=Mus musculus OX=10090 GN=Epb41l1 PE=1 SV=1
846	1266	Q9Z2H5|E41L1_MOUSE	49.59	2	0	2	1640000		2	1	0	2		98315	Band 4.1-like protein 1 OS=Mus musculus OX=10090 GN=Epb41l1 PE=1 SV=2
717	1467	Q9WTR5|CAD13_MOUSE	49.38	2	2	2	423000	0	1	1	1	1		78186	Cadherin-13 OS=Mus musculus OX=10090 GN=Cdh13 PE=1 SV=2
1401	1734	P99028|QCR6_MOUSE	49.23	20	0	20	84000		1	1	0	1	Carbamidomethylation	10435	Cytochrome b-c1 complex subunit 6 mitochondrial OS=Mus musculus OX=10090 GN=Uqcrh PE=1 SV=2
1402	1749	Q9D6J5|NDUB8_MOUSE	49.16	6	6	0		593000	1	1	1	0		21876	NADH dehydrogenase [ubiquinone] 1 beta subcomplex subunit 8 mitochondrial OS=Mus musculus OX=10090 GN=Ndufb8 PE=1 SV=1
1404	1786	Q62418|DBNL_MOUSE	49.12	3	3	0		365000	1	1	1	0		48700	Drebrin-like protein OS=Mus musculus OX=10090 GN=Dbnl PE=1 SV=2
711	1421	Q9CQJ8|NDUB9_MOUSE	48.9	5	5	5	2040000	2140000	1	1	1	1	Carbamidomethylation	21984	NADH dehydrogenase [ubiquinone] 1 beta subcomplex subunit 9 OS=Mus musculus OX=10090 GN=Ndufb9 PE=1 SV=3
898	1802	tr|A0A3Q4EI78|A0A3Q4EI78_MOUSE	48.84	11	11	11	752000	0	1	1	1	1		9029	Aquaporin-4 (Fragment) OS=Mus musculus OX=10090 GN=Aqp4 PE=1 SV=1
898	1875	P55088|AQP4_MOUSE	48.84	3	3	3	752000	0	1	1	1	1		34436	Aquaporin-4 OS=Mus musculus OX=10090 GN=Aqp4 PE=1 SV=2
898	1874	tr|A0A0R4J0Z3|A0A0R4J0Z3_MOUSE	48.84	3	3	3	752000	0	1	1	1	1		34535	Aquaporin 4 isoform CRA_a OS=Mus musculus OX=10090 GN=Aqp4 PE=1 SV=1
897	1798	tr|A0A0N4SVB8|A0A0N4SVB8_MOUSE	48.78	7	7	7	264000	281000	1	1	1	1	Carbamidomethylation	15986	ADP-ribosylation factor-like protein 8B OS=Mus musculus OX=10090 GN=Arl8b PE=1 SV=1
897	1799	tr|F6QKK2|F6QKK2_MOUSE	48.78	6	6	6	264000	281000	1	1	1	1	Carbamidomethylation	18875	ADP-ribosylation factor-like protein 8A (Fragment) OS=Mus musculus OX=10090 GN=Arl8a PE=1 SV=1
897	1801	Q9CQW2|ARL8B_MOUSE	48.78	5	5	5	264000	281000	1	1	1	1	Carbamidomethylation	21539	ADP-ribosylation factor-like protein 8B OS=Mus musculus OX=10090 GN=Arl8b PE=1 SV=1
897	1800	Q8VEH3|ARL8A_MOUSE	48.78	5	5	5	264000	281000	1	1	1	1	Carbamidomethylation	21390	ADP-ribosylation factor-like protein 8A OS=Mus musculus OX=10090 GN=Arl8a PE=1 SV=1
896	1784	tr|D3YVF4|D3YVF4_MOUSE	48.57	9	9	9	2040000	1740000	1	1	1	1		12711	40S ribosomal protein S14 (Fragment) OS=Mus musculus OX=10090 GN=Rps14 PE=1 SV=1
896	1789	tr|D3Z7I1|D3Z7I1_MOUSE	48.57	8	8	8	2040000	1740000	1	1	1	1		14735	40S ribosomal protein S14 (Fragment) OS=Mus musculus OX=10090 GN=Rps14 PE=1 SV=1
896	1791	P62264|RS14_MOUSE	48.57	7	7	7	2040000	1740000	1	1	1	1		16273	40S ribosomal protein S14 OS=Mus musculus OX=10090 GN=Rps14 PE=1 SV=3
708	1375	tr|Q8K1K2|Q8K1K2_MOUSE	48.54	4	4	4	246000	256000	1	1	1	1		38752	26S proteasome regulatory subunit 8 OS=Mus musculus OX=10090 GN=Psmc5 PE=1 SV=1
708	1376	P62196|PRS8_MOUSE	48.54	3	3	3	246000	256000	1	1	1	1		45626	26S proteasome regulatory subunit 8 OS=Mus musculus OX=10090 GN=Psmc5 PE=1 SV=1
1405	1792	tr|Q3UPV6|Q3UPV6_MOUSE	48.53	3	3	0		1120000	1	1	1	0		39308	Voltage-gated potassium channel subunit beta-2 OS=Mus musculus OX=10090 GN=Kcnab2 PE=1 SV=1
1405	1793	P62482|KCAB2_MOUSE	48.53	3	3	0		1120000	1	1	1	0		41021	Voltage-gated potassium channel subunit beta-2 OS=Mus musculus OX=10090 GN=Kcnab2 PE=1 SV=1
1405	1794	tr|E0CXZ9|E0CXZ9_MOUSE	48.53	3	3	0		1120000	1	1	1	0		42734	Voltage-gated potassium channel subunit beta-2 OS=Mus musculus OX=10090 GN=Kcnab2 PE=1 SV=1
1403	1779	tr|A0A0G2JFK7|A0A0G2JFK7_MOUSE	48.01	8	8	0		2460000	1	1	1	0		16401	Actin-related protein 2/3 complex subunit 3 (Fragment) OS=Mus musculus OX=10090 GN=Arpc3 PE=1 SV=1
1403	1785	tr|D3Z2F7|D3Z2F7_MOUSE	48.01	7	7	0		2460000	1	1	1	0		18683	Actin-related protein 2/3 complex subunit 3 OS=Mus musculus OX=10090 GN=Arpc3 PE=1 SV=1
1403	1787	tr|D3Z2F8|D3Z2F8_MOUSE	48.01	7	7	0		2460000	1	1	1	0		18942	Actin-related protein 2/3 complex subunit 3 OS=Mus musculus OX=10090 GN=Arpc3 PE=1 SV=1
1403	1788	tr|H7BWZ3|H7BWZ3_MOUSE	48.01	6	6	0		2460000	1	1	1	0		19638	Actin-related protein 2/3 complex subunit 3 OS=Mus musculus OX=10090 GN=Arpc3 PE=1 SV=1
1403	1790	Q9JM76|ARPC3_MOUSE	48.01	6	6	0		2460000	1	1	1	0		20525	Actin-related protein 2/3 complex subunit 3 OS=Mus musculus OX=10090 GN=Arpc3 PE=1 SV=3
895	1778	tr|A0A0G2JE32|A0A0G2JE32_MOUSE	48.01	8	8	8	1450000	1420000	1	1	1	1		14731	Ubiquitin-conjugating enzyme E2 D3 (Fragment) OS=Mus musculus OX=10090 GN=Ube2d3 PE=1 SV=1
895	1782	P62838|UB2D2_MOUSE	48.01	7	7	7	1450000	1420000	1	1	1	1		16735	Ubiquitin-conjugating enzyme E2 D2 OS=Mus musculus OX=10090 GN=Ube2d2 PE=1 SV=1
895	1781	Q6ZWY6|U2D2B_MOUSE	48.01	7	7	7	1450000	1420000	1	1	1	1		16659	Ubiquitin-conjugating enzyme E2 D2B OS=Mus musculus OX=10090 GN=Ube2d2b PE=1 SV=1
895	1780	P61079|UB2D3_MOUSE	48.01	7	7	7	1450000	1420000	1	1	1	1		16687	Ubiquitin-conjugating enzyme E2 D3 OS=Mus musculus OX=10090 GN=Ube2d3 PE=1 SV=1
895	1783	tr|A0A0G2JGL0|A0A0G2JGL0_MOUSE	48.01	7	7	7	1450000	1420000	1	1	1	1		16785	Ubiquitin-conjugating enzyme E2 D3 OS=Mus musculus OX=10090 GN=Ube2d3 PE=1 SV=1
579	1352	Q9D023|MPC2_MOUSE	48	6	6	6	1120000	1110000	1	1	1	1		14286	Mitochondrial pyruvate carrier 2 OS=Mus musculus OX=10090 GN=Mpc2 PE=1 SV=1
901	1819	Q9CQ75|NDUA2_MOUSE	47.32	10	10	10	3090000	2240000	1	1	1	1		10916	NADH dehydrogenase [ubiquinone] 1 alpha subcomplex subunit 2 OS=Mus musculus OX=10090 GN=Ndufa2 PE=1 SV=3
903	1821	tr|A0A0R4J150|A0A0R4J150_MOUSE	47.16	1	1	1	73300	82400	1	1	1	1		96981	Oxysterol-binding protein OS=Mus musculus OX=10090 GN=Osbpl8 PE=1 SV=1
903	1822	B9EJ86|OSBL8_MOUSE	47.16	1	1	1	73300	82400	1	1	1	1		101269	Oxysterol-binding protein-related protein 8 OS=Mus musculus OX=10090 GN=Osbpl8 PE=1 SV=1
899	1805	Q6W8Q3|PC4L1_MOUSE	46.9	21	21	21	281000	261000	1	1	1	1		7502	Purkinje cell protein 4-like protein 1 OS=Mus musculus OX=10090 GN=Pcp4l1 PE=1 SV=1
1406	1807	P47791|GSHR_MOUSE	46.76	3	0	3	386000		1	1	0	1	Carbamidomethylation	53663	Glutathione reductase mitochondrial OS=Mus musculus OX=10090 GN=Gsr PE=1 SV=3
1407	1808	P00493|HPRT_MOUSE	46.74	6	0	6	350000		1	1	0	1	Carbamidomethylation	24570	Hypoxanthine-guanine phosphoribosyltransferase OS=Mus musculus OX=10090 GN=Hprt1 PE=1 SV=3
900	1812	tr|A0A2I3BQH3|A0A2I3BQH3_MOUSE	46.72	15	15	15	209000	272000	1	1	1	1		8678	Heterogeneous nuclear ribonucleoproteins C1/C2 (Fragment) OS=Mus musculus OX=10090 GN=Hnrnpc PE=1 SV=1
900	1813	tr|A0A2I3BRM6|A0A2I3BRM6_MOUSE	46.72	10	10	10	209000	272000	1	1	1	1		12781	Heterogeneous nuclear ribonucleoproteins C1/C2 (Fragment) OS=Mus musculus OX=10090 GN=Hnrnpc PE=1 SV=1
900	1816	Q9Z204|HNRPC_MOUSE	46.72	4	4	4	209000	272000	1	1	1	1		34385	Heterogeneous nuclear ribonucleoproteins C1/C2 OS=Mus musculus OX=10090 GN=Hnrnpc PE=1 SV=1
902	1820	Q8K2C9|HACD3_MOUSE	46.5	3	3	3	1580000	1650000	1	1	1	1		43131	Very-long-chain (3R)-3-hydroxyacyl-CoA dehydratase 3 OS=Mus musculus OX=10090 GN=Hacd3 PE=1 SV=2
937	2106	P17047|LAMP2_MOUSE	46.41	2	2	2	342000	218000	1	1	1	1		45681	Lysosome-associated membrane glycoprotein 2 OS=Mus musculus OX=10090 GN=Lamp2 PE=1 SV=2
1409	1835	tr|Q3TF41|Q3TF41_MOUSE	46.1	3	3	0		0	1	1	1	0		42733	Nucleosome assembly protein 1-like 1 OS=Mus musculus OX=10090 GN=Nap1l1 PE=1 SV=1
1409	1836	tr|Q8BSH9|Q8BSH9_MOUSE	46.1	3	3	0		0	1	1	1	0		44598	Nucleosome assembly protein 1-like 1 OS=Mus musculus OX=10090 GN=Nap1l1 PE=1 SV=1
1409	1837	P28656|NP1L1_MOUSE	46.1	3	3	0		0	1	1	1	0		45345	Nucleosome assembly protein 1-like 1 OS=Mus musculus OX=10090 GN=Nap1l1 PE=1 SV=2
904	1839	tr|A0A1B0GT66|A0A1B0GT66_MOUSE	45.57	4	4	4	1670000	1430000	1	1	1	1		29418	Predicted gene 49369 (Fragment) OS=Mus musculus OX=10090 GN=Gm49369 PE=1 SV=1
904	1840	tr|F6Y6L6|F6Y6L6_MOUSE	45.57	4	4	4	1670000	1430000	1	1	1	1		29961	Predicted gene 49369 (Fragment) OS=Mus musculus OX=10090 GN=Gm49369 PE=1 SV=1
904	1844	tr|F8WIR1|F8WIR1_MOUSE	45.57	2	2	2	1670000	1430000	1	1	1	1		44215	Cathepsin D OS=Mus musculus OX=10090 GN=Ctsd PE=1 SV=2
904	1845	P18242|CATD_MOUSE	45.57	2	2	2	1670000	1430000	1	1	1	1		44954	Cathepsin D OS=Mus musculus OX=10090 GN=Ctsd PE=1 SV=1
1408	1829	tr|A0A286YDW8|A0A286YDW8_MOUSE	45.55	8	8	0		164000	1	1	1	0		22824	26S proteasome non-ATPase regulatory subunit 6 (Fragment) OS=Mus musculus OX=10090 GN=Psmd6 PE=1 SV=1
1408	1830	Q99JI4|PSMD6_MOUSE	45.55	4	4	0		164000	1	1	1	0		45536	26S proteasome non-ATPase regulatory subunit 6 OS=Mus musculus OX=10090 GN=Psmd6 PE=1 SV=1
1412	1848	P04925|PRIO_MOUSE	45.53	4	0	4	441000		1	1	0	1		27977	Major prion protein OS=Mus musculus OX=10090 GN=Prnp PE=1 SV=2
1411	1846	O35658|C1QBP_MOUSE	45.43	5	0	5	995000		1	1	0	1		31013	Complement component 1 Q subcomponent-binding protein mitochondrial OS=Mus musculus OX=10090 GN=C1qbp PE=1 SV=1
1411	1847	tr|Q8R5L1|Q8R5L1_MOUSE	45.43	5	0	5	995000		1	1	0	1		31025	Complement component 1 Q subcomponent-binding protein mitochondrial OS=Mus musculus OX=10090 GN=C1qbp PE=1 SV=1
1410	1838	O08795|GLU2B_MOUSE	45.36	2	2	0		206000	1	1	1	0		58793	Glucosidase 2 subunit beta OS=Mus musculus OX=10090 GN=Prkcsh PE=1 SV=1
908	1859	P62267|RS23_MOUSE	45.21	8	8	8	383000	516000	1	1	1	1		15808	40S ribosomal protein S23 OS=Mus musculus OX=10090 GN=Rps23 PE=1 SV=3
906	1851	Q8K3J1|NDUS8_MOUSE	45.18	5	5	5	4000000	3340000	1	1	1	1		24038	NADH dehydrogenase [ubiquinone] iron-sulfur protein 8 mitochondrial OS=Mus musculus OX=10090 GN=Ndufs8 PE=1 SV=1
1413	1858	Q61838|PZP_MOUSE	44.94	1	0	1	869000		1	1	0	1		165852	Pregnancy zone protein OS=Mus musculus OX=10090 GN=Pzp PE=1 SV=3
907	1852	Q9D8B4|NDUAB_MOUSE	44.67	8	8	8	1070000	1070000	1	1	1	1		14982	NADH dehydrogenase [ubiquinone] 1 alpha subcomplex subunit 11 OS=Mus musculus OX=10090 GN=Ndufa11 PE=1 SV=2
907	1853	tr|G5E814|G5E814_MOUSE	44.67	8	8	8	1070000	1070000	1	1	1	1		15115	MCG5603 OS=Mus musculus OX=10090 GN=Ndufa11 PE=1 SV=1
919	1952	P00158|CYB_MOUSE	44.57	2	2	2	1030000	1180000	1	1	1	1		43210	Cytochrome b OS=Mus musculus OX=10090 GN=Mt-Cyb PE=1 SV=1
909	1862	P46471|PRS7_MOUSE	44.46	3	3	3	822000	831000	1	1	1	1		48648	26S proteasome regulatory subunit 7 OS=Mus musculus OX=10090 GN=Psmc2 PE=1 SV=5
909	1863	tr|Q8BVQ9|Q8BVQ9_MOUSE	44.46	3	3	3	822000	831000	1	1	1	1		52867	26S proteasome regulatory subunit 7 OS=Mus musculus OX=10090 GN=Psmc2 PE=1 SV=1
914	1895	Q9CWZ7|SNAG_MOUSE	44.45	3	3	3	584000	894000	1	1	1	1	Carbamidomethylation	34732	Gamma-soluble NSF attachment protein OS=Mus musculus OX=10090 GN=Napg PE=1 SV=1
914	1907	tr|D3Z4B2|D3Z4B2_MOUSE	44.45	3	3	3	584000	894000	1	1	1	1	Carbamidomethylation	39367	Gamma-soluble NSF attachment protein (Fragment) OS=Mus musculus OX=10090 GN=Napg PE=1 SV=1
910	1865	tr|Q8C635|Q8C635_MOUSE	44.2	2	2	2	156000	186000	1	1	1	1		59917	Glycerol kinase-like 1 OS=Mus musculus OX=10090 GN=Gykl1 PE=1 SV=1
910	1866	tr|B1ASZ3|B1ASZ3_MOUSE	44.2	2	2	2	156000	186000	1	1	1	1		59833	Glycerol kinase OS=Mus musculus OX=10090 GN=Gk PE=1 SV=1
910	1867	Q9WU65|GLPK2_MOUSE	44.2	2	2	2	156000	186000	1	1	1	1		60630	Glycerol kinase 2 OS=Mus musculus OX=10090 GN=Gk2 PE=1 SV=1
910	1868	Q64516|GLPK_MOUSE	44.2	2	2	2	156000	186000	1	1	1	1		61228	Glycerol kinase OS=Mus musculus OX=10090 GN=Gk PE=1 SV=2
716	1460	tr|A0A140LHF7|A0A140LHF7_MOUSE	44.09	6	6	6	68400	63400	1	1	1	1		24419	Protein arginine N-methyltransferase 1 OS=Mus musculus OX=10090 GN=Prmt1 PE=1 SV=1
716	1461	tr|A0A171KXD3|A0A171KXD3_MOUSE	44.09	4	4	4	68400	63400	1	1	1	1		36567	Protein arginine N-methyltransferase 1 OS=Mus musculus OX=10090 GN=Prmt1 PE=1 SV=1
716	1462	Q9JIF0|ANM1_MOUSE	44.09	3	3	3	68400	63400	1	1	1	1		42436	Protein arginine N-methyltransferase 1 OS=Mus musculus OX=10090 GN=Prmt1 PE=1 SV=1
867	1463	tr|A0A2R8VK70|A0A2R8VK70_MOUSE	43.77	3	3	0		1960000	1	1	1	0		35077	Leukocyte surface antigen CD47 OS=Mus musculus OX=10090 GN=Cd47 PE=1 SV=1
867	1464	tr|A0A2R8W6P0|A0A2R8W6P0_MOUSE	43.77	3	3	0		1960000	1	1	1	0		37296	Leukocyte surface antigen CD47 OS=Mus musculus OX=10090 GN=Cd47 PE=1 SV=1
913	1891	Q9DCZ4|MIC26_MOUSE	43.66	6	6	6	1680000	1390000	1	1	1	1		22604	MICOS complex subunit Mic26 OS=Mus musculus OX=10090 GN=Apoo PE=1 SV=2
1423	1964	tr|S4R1I6|S4R1I6_MOUSE	43.6	2	0	2	662000		1	1	0	1	Carbamidomethylation	46073	MCG2872 isoform CRA_b OS=Mus musculus OX=10090 GN=Ddx5 PE=1 SV=1
1423	1989	Q61656|DDX5_MOUSE	43.6	1	0	1	662000		1	1	0	1	Carbamidomethylation	69290	Probable ATP-dependent RNA helicase DDX5 OS=Mus musculus OX=10090 GN=Ddx5 PE=1 SV=2
1423	1990	tr|Q8BTS0|Q8BTS0_MOUSE	43.6	1	0	1	662000		1	1	0	1	Carbamidomethylation	69266	DEAD (Asp-Glu-Ala-Asp) box polypeptide 5 OS=Mus musculus OX=10090 GN=Ddx5 PE=1 SV=1
911	1872	Q8K4Z3|NNRE_MOUSE	43.45	4	4	4	1520000	1450000	1	1	1	1		30973	NAD(P)H-hydrate epimerase OS=Mus musculus OX=10090 GN=Naxe PE=1 SV=1
734	1901	tr|A2AMH8|A2AMH8_MOUSE	43.41	3	3	3	89800	131000	1	1	1	2		50570	Choline transporter-like protein 1 OS=Mus musculus OX=10090 GN=Slc44a1 PE=1 SV=1
734	1902	tr|A2AMH3|A2AMH3_MOUSE	43.41	2	2	2	89800	131000	1	1	1	2		59118	Choline transporter-like protein 1 OS=Mus musculus OX=10090 GN=Slc44a1 PE=1 SV=1
734	1903	Q6X893|CTL1_MOUSE	43.41	2	2	2	89800	131000	1	1	1	2		73067	Choline transporter-like protein 1 OS=Mus musculus OX=10090 GN=Slc44a1 PE=1 SV=3
734	1904	tr|A2AMH5|A2AMH5_MOUSE	43.41	2	2	2	89800	131000	1	1	1	2		73045	Choline transporter-like protein 1 OS=Mus musculus OX=10090 GN=Slc44a1 PE=1 SV=1
734	1905	tr|A2AMH4|A2AMH4_MOUSE	43.41	2	2	2	89800	131000	1	1	1	2		80064	Choline transporter-like protein 1 OS=Mus musculus OX=10090 GN=Slc44a1 PE=1 SV=1
1425	1979	O70443|GNAZ_MOUSE	43.37	3	0	3	443000		1	1	0	1		40850	Guanine nucleotide-binding protein G(z) subunit alpha OS=Mus musculus OX=10090 GN=Gnaz PE=1 SV=4
912	1884	P62242|RS8_MOUSE	43.22	5	5	5	0	0	1	1	1	1		24205	40S ribosomal protein S8 OS=Mus musculus OX=10090 GN=Rps8 PE=1 SV=2
1415	1916	P14115|RL27A_MOUSE	43.17	7	0	7	855000		1	1	0	1		16605	60S ribosomal protein L27a OS=Mus musculus OX=10090 GN=Rpl27a PE=1 SV=5
1414	1885	P12970|RL7A_MOUSE	43.02	5	5	0		0	1	1	1	0		29977	60S ribosomal protein L7a OS=Mus musculus OX=10090 GN=Rpl7a PE=1 SV=2
733	1886	Q8CG76|ARK72_MOUSE	42.96	4	4	4	212000	0	1	1	1	1		40612	Aflatoxin B1 aldehyde reductase member 2 OS=Mus musculus OX=10090 GN=Akr7a2 PE=1 SV=3
461	860	Q9EQH3|VPS35_MOUSE	42.82	2	2	2	200000	165000	1	1	1	1		91713	Vacuolar protein sorting-associated protein 35 OS=Mus musculus OX=10090 GN=Vps35 PE=1 SV=1
719	1486	tr|Q91V35|Q91V35_MOUSE	42.23	2	2	2	98900	114000	1	1	1	1		89842	Receptor-type tyrosine-protein phosphatase alpha OS=Mus musculus OX=10090 GN=Ptpra PE=1 SV=1
719	1487	P18052|PTPRA_MOUSE	42.23	1	1	1	98900	114000	1	1	1	1		93698	Receptor-type tyrosine-protein phosphatase alpha OS=Mus musculus OX=10090 GN=Ptpra PE=1 SV=3
1416	1918	tr|E9Q4G8|E9Q4G8_MOUSE	42.16	2	0	2	0		1	1	0	1		61901	CD166 antigen OS=Mus musculus OX=10090 GN=Alcam PE=1 SV=1
1416	1919	tr|E9Q3Q6|E9Q3Q6_MOUSE	42.16	2	0	2	0		1	1	0	1		63669	CD166 antigen OS=Mus musculus OX=10090 GN=Alcam PE=1 SV=1
1416	1920	Q61490|CD166_MOUSE	42.16	2	0	2	0		1	1	0	1		65092	CD166 antigen OS=Mus musculus OX=10090 GN=Alcam PE=1 SV=3
1417	1922	Q9D6J6|NDUV2_MOUSE	42.15	8	8	0		0	1	1	1	0		27285	NADH dehydrogenase [ubiquinone] flavoprotein 2 mitochondrial OS=Mus musculus OX=10090 GN=Ndufv2 PE=1 SV=2
924	1991	Q62465|VAT1_MOUSE	42.11	2	2	2	863000	1250000	1	1	1	1		43097	Synaptic vesicle membrane protein VAT-1 homolog OS=Mus musculus OX=10090 GN=Vat1 PE=1 SV=3
918	1946	tr|A2AGN7|A2AGN7_MOUSE	42.1	2	2	2	332000	342000	1	1	1	1		44669	26S proteasome regulatory subunit 6A OS=Mus musculus OX=10090 GN=Psmc3 PE=1 SV=1
918	1950	O88685|PRS6A_MOUSE	42.1	2	2	2	332000	342000	1	1	1	1		49549	26S proteasome regulatory subunit 6A OS=Mus musculus OX=10090 GN=Psmc3 PE=1 SV=2
918	1951	tr|B7ZCF1|B7ZCF1_MOUSE	42.1	2	2	2	332000	342000	1	1	1	1		50396	26S proteasome regulatory subunit 6A OS=Mus musculus OX=10090 GN=Psmc3 PE=1 SV=1
705	1355	tr|B1AX58|B1AX58_MOUSE	42.05	3	3	1		663000	2	1	2	1		71746	Plastin-3 OS=Mus musculus OX=10090 GN=Pls3 PE=1 SV=1
915	1923	tr|A0A1L1SUK3|A0A1L1SUK3_MOUSE	42	8	8	8	947000	778000	1	1	1	1		15103	40S ribosomal protein SA OS=Mus musculus OX=10090 GN=Rpsa PE=1 SV=1
915	1933	P14206|RSSA_MOUSE	42	3	3	3	947000	778000	1	1	1	1		32838	40S ribosomal protein SA OS=Mus musculus OX=10090 GN=Rpsa PE=1 SV=4
1419	1941	tr|F8VQ42|F8VQ42_MOUSE	41.96	2	2	0		244000	1	1	1	0		75969	Kinesin-like protein (Fragment) OS=Mus musculus OX=10090 GN=Kif2a PE=1 SV=1
1419	1942	P28740|KIF2A_MOUSE	41.96	2	2	0		244000	1	1	1	0		79756	Kinesin-like protein KIF2A OS=Mus musculus OX=10090 GN=Kif2a PE=1 SV=2
1419	1945	tr|E0CZ72|E0CZ72_MOUSE	41.96	1	1	0		244000	1	1	1	0		83861	Kinesin-like protein OS=Mus musculus OX=10090 GN=Kif2a PE=1 SV=1
916	1925	P70202|LXN_MOUSE	41.9	5	5	5	1330000	1260000	1	1	1	1		25492	Latexin OS=Mus musculus OX=10090 GN=Lxn PE=1 SV=2
925	2000	P32037|GTR3_MOUSE	41.88	2	2	2	734000	634000	1	1	1	1		53479	Solute carrier family 2 facilitated glucose transporter member 3 OS=Mus musculus OX=10090 GN=Slc2a3 PE=1 SV=1
917	1928	tr|D3Z2J6|D3Z2J6_MOUSE	41.79	5	5	5	222000	168000	1	1	1	1		29591	Thioredoxin-related transmembrane protein 2 OS=Mus musculus OX=10090 GN=Tmx2 PE=1 SV=1
917	1929	Q9D710|TMX2_MOUSE	41.79	4	4	4	222000	168000	1	1	1	1		33943	Thioredoxin-related transmembrane protein 2 OS=Mus musculus OX=10090 GN=Tmx2 PE=1 SV=1
1422	1959	tr|A0A2I3BR37|A0A2I3BR37_MOUSE	41.77	7	0	7	3650000		1	1	0	1		14152	Polyadenylate-binding protein 1 (Fragment) OS=Mus musculus OX=10090 GN=Pabpc1 PE=1 SV=1
1422	1988	tr|Q8C7D3|Q8C7D3_MOUSE	41.77	2	0	2	3650000		1	1	0	1		43350	Poly A binding protein cytoplasmic 5 OS=Mus musculus OX=10090 GN=Pabpc5 PE=2 SV=1
1422	2007	P29341|PABP1_MOUSE	41.77	1	0	1	3650000		1	1	0	1		70671	Polyadenylate-binding protein 1 OS=Mus musculus OX=10090 GN=Pabpc1 PE=1 SV=2
923	1966	tr|A0A087WSE0|A0A087WSE0_MOUSE	41.5	31	31	31	214000	199000	1	1	1	1		3900	Alpha-1-antitrypsin 1-2 (Fragment) OS=Mus musculus OX=10090 GN=Serpina1b PE=4 SV=1
923	1967	tr|D3YZL0|D3YZL0_MOUSE	41.5	11	11	11	214000	199000	1	1	1	1		10330	Alpha-1-antitrypsin 1-1 (Fragment) OS=Mus musculus OX=10090 GN=Serpina1a PE=3 SV=1
923	1968	Q00896|A1AT3_MOUSE	41.5	3	3	3	214000	199000	1	1	1	1		45823	Alpha-1-antitrypsin 1-3 OS=Mus musculus OX=10090 GN=Serpina1c PE=1 SV=2
923	1973	tr|A0A0R4J0X5|A0A0R4J0X5_MOUSE	41.5	3	3	3	214000	199000	1	1	1	1		45854	Alpha-1-antitrypsin 1-3 OS=Mus musculus OX=10090 GN=Serpina1c PE=1 SV=1
923	1972	Q00898|A1AT5_MOUSE	41.5	3	3	3	214000	199000	1	1	1	1		45891	Alpha-1-antitrypsin 1-5 OS=Mus musculus OX=10090 GN=Serpina1e PE=1 SV=1
923	1971	P07758|A1AT1_MOUSE	41.5	3	3	3	214000	199000	1	1	1	1		46003	Alpha-1-antitrypsin 1-1 OS=Mus musculus OX=10090 GN=Serpina1a PE=1 SV=4
923	1970	Q00897|A1AT4_MOUSE	41.5	3	3	3	214000	199000	1	1	1	1		45998	Alpha-1-antitrypsin 1-4 OS=Mus musculus OX=10090 GN=Serpina1d PE=1 SV=1
923	1969	P22599|A1AT2_MOUSE	41.5	3	3	3	214000	199000	1	1	1	1		45975	Alpha-1-antitrypsin 1-2 OS=Mus musculus OX=10090 GN=Serpina1b PE=1 SV=2
923	1974	tr|A0A0A0MQA3|A0A0A0MQA3_MOUSE	41.5	3	3	3	214000	199000	1	1	1	1		48796	Alpha-1-antitrypsin 1-1 OS=Mus musculus OX=10090 GN=Serpina1a PE=1 SV=1
735	1934	tr|A2AUE1|A2AUE1_MOUSE	41.25	11	11	11	1190000	0	1	1	1	1		15819	DnaJ homolog subfamily C member 5 (Fragment) OS=Mus musculus OX=10090 GN=Dnajc5 PE=1 SV=1
735	1935	tr|G5E8T0|G5E8T0_MOUSE	41.25	9	9	9	1190000	0	1	1	1	1		18753	DnaJ (Hsp40) homolog subfamily C member 5 isoform CRA_b OS=Mus musculus OX=10090 GN=Dnajc5 PE=1 SV=1
735	1936	P60904|DNJC5_MOUSE	41.25	8	8	8	1190000	0	1	1	1	1		22101	DnaJ homolog subfamily C member 5 OS=Mus musculus OX=10090 GN=Dnajc5 PE=1 SV=1
715	1449	Q64288|OMP_MOUSE	41.22	7	7	7	79900	90500	1	1	1	1		18867	Olfactory marker protein OS=Mus musculus OX=10090 GN=Omp PE=1 SV=3
1418	1937	tr|A0A338P7A0|A0A338P7A0_MOUSE	41.21	13	13	0		981000	1	1	1	0		13438	NADH dehydrogenase [ubiquinone] iron-sulfur protein 4 mitochondrial (Fragment) OS=Mus musculus OX=10090 GN=Ndufs4 PE=1 SV=1
1418	1939	tr|E9QPX3|E9QPX3_MOUSE	41.21	9	9	0		981000	1	1	1	0		19803	NADH dehydrogenase [ubiquinone] iron-sulfur protein 4 mitochondrial OS=Mus musculus OX=10090 GN=Ndufs4 PE=1 SV=1
1418	1938	Q9CXZ1|NDUS4_MOUSE	41.21	9	9	0		981000	1	1	1	0		19785	NADH dehydrogenase [ubiquinone] iron-sulfur protein 4 mitochondrial OS=Mus musculus OX=10090 GN=Ndufs4 PE=1 SV=3
921	1958	tr|A2BE92|A2BE92_MOUSE	41.13	7	7	7	1010000	484000	1	1	1	1		17584	Protein SET (Fragment) OS=Mus musculus OX=10090 GN=Set PE=1 SV=1
921	1960	tr|A2BE93|A2BE93_MOUSE	41.13	5	5	5	1010000	484000	1	1	1	1		24924	Protein SET (Fragment) OS=Mus musculus OX=10090 GN=Set PE=1 SV=1
921	1961	Q9EQU5|SET_MOUSE	41.13	4	4	4	1010000	484000	1	1	1	1		33378	Protein SET OS=Mus musculus OX=10090 GN=Set PE=1 SV=1
866	1447	Q9JME5|AP3B2_MOUSE	40.93	1	1	0		144000	1	1	1	0		119192	AP-3 complex subunit beta-2 OS=Mus musculus OX=10090 GN=Ap3b2 PE=1 SV=2
1424	1978	tr|A0A0R4J2B2|A0A0R4J2B2_MOUSE	40.9	4	0	4	96400		1	1	0	1		35888	BTB/POZ domain-containing protein KCTD12 OS=Mus musculus OX=10090 GN=Kctd12 PE=1 SV=1
1424	1977	Q6WVG3|KCD12_MOUSE	40.9	4	0	4	96400		1	1	0	1		35892	BTB/POZ domain-containing protein KCTD12 OS=Mus musculus OX=10090 GN=Kctd12 PE=1 SV=1
865	1444	Q61879|MYH10_MOUSE	40.81	1	1	0		225000	1	1	1	0		228994	Myosin-10 OS=Mus musculus OX=10090 GN=Myh10 PE=1 SV=2
865	1445	tr|Q5SV64|Q5SV64_MOUSE	40.81	1	1	0		225000	1	1	1	0		232470	Myosin-10 OS=Mus musculus OX=10090 GN=Myh10 PE=1 SV=1
865	1446	tr|Q3UH59|Q3UH59_MOUSE	40.81	1	1	0		225000	1	1	1	0		233447	Myosin-10 OS=Mus musculus OX=10090 GN=Myh10 PE=1 SV=1
922	1965	P34884|MIF_MOUSE	40.79	8	8	8	6110000	5320000	1	1	1	1	Carbamidomethylation	12504	Macrophage migration inhibitory factor OS=Mus musculus OX=10090 GN=Mif PE=1 SV=2
920	1957	tr|B8JJA9|B8JJA9_MOUSE	40.71	18	18	18	8360000	8840000	1	1	1	1		5745	Cytochrome c oxidase subunit 7C mitochondrial OS=Mus musculus OX=10090 GN=Cox7c PE=1 SV=1
920	1962	P17665|COX7C_MOUSE	40.71	14	14	14	8360000	8840000	1	1	1	1		7333	Cytochrome c oxidase subunit 7C mitochondrial OS=Mus musculus OX=10090 GN=Cox7c PE=1 SV=1
1420	1949	Q8BWT1|THIM_MOUSE	40.64	4	4	0		0	1	1	1	0		41830	3-ketoacyl-CoA thiolase mitochondrial OS=Mus musculus OX=10090 GN=Acaa2 PE=1 SV=3
1421	1953	tr|A0A1W2P7D8|A0A1W2P7D8_MOUSE	40.52	24	24	0		402000	1	1	1	0		6943	Serine/threonine-protein phosphatase 2A 56 kDa regulatory subunit epsilon isoform OS=Mus musculus OX=10090 GN=Ppp2r5e PE=1 SV=1
1421	1954	tr|Q3UZJ4|Q3UZJ4_MOUSE	40.52	3	3	0		402000	1	1	1	0		50830	Serine/threonine-protein phosphatase 2A 56 kDa regulatory subunit OS=Mus musculus OX=10090 GN=Ppp2r5e PE=1 SV=1
1421	1955	Q61151|2A5E_MOUSE	40.52	3	3	0		402000	1	1	1	0		54714	Serine/threonine-protein phosphatase 2A 56 kDa regulatory subunit epsilon isoform OS=Mus musculus OX=10090 GN=Ppp2r5e PE=1 SV=3
941	2128	Q9EPL8|IPO7_MOUSE	39.91	1	1	1	91800	109000	1	1	1	1		119486	Importin-7 OS=Mus musculus OX=10090 GN=Ipo7 PE=1 SV=2
940	2124	P24369|PPIB_MOUSE	39.9	4	4	4	768000	875000	1	1	1	1		23713	Peptidyl-prolyl cis-trans isomerase B OS=Mus musculus OX=10090 GN=Ppib PE=1 SV=2
935	2099	Q8BP67|RL24_MOUSE	39.8	5	5	5	1490000	1100000	1	1	1	1		17779	60S ribosomal protein L24 OS=Mus musculus OX=10090 GN=Rpl24 PE=1 SV=2
926	2008	Q8R071|IP3KA_MOUSE	39.67	2	2	2	109000	107000	1	1	1	1		50935	Inositol-trisphosphate 3-kinase A OS=Mus musculus OX=10090 GN=Itpka PE=1 SV=1
1426	2010	Q8R1Q8|DC1L1_MOUSE	39.44	2	0	2	656000		1	1	0	1		56614	Cytoplasmic dynein 1 light intermediate chain 1 OS=Mus musculus OX=10090 GN=Dync1li1 PE=1 SV=1
736	2105	P09405|NUCL_MOUSE	39.3	1	1	1	640000	783000	1	1	1	1		76723	Nucleolin OS=Mus musculus OX=10090 GN=Ncl PE=1 SV=2
1427	2018	tr|G3UXT7|G3UXT7_MOUSE	39.22	7	7	0		501000	1	1	1	0		14016	RNA-binding protein FUS (Fragment) OS=Mus musculus OX=10090 GN=Fus PE=1 SV=1
1427	2053	tr|F6QCI0|F6QCI0_MOUSE	39.22	3	3	0		501000	1	1	1	0		33723	TATA-box-binding protein-associated factor 15 (Fragment) OS=Mus musculus OX=10090 GN=Taf15 PE=1 SV=1
1427	2076	tr|Q8CFQ9|Q8CFQ9_MOUSE	39.22	2	2	0		501000	1	1	1	0		52602	Fusion derived from t(1216) malignant liposarcoma (Human) OS=Mus musculus OX=10090 GN=Fus PE=1 SV=1
1427	2077	P56959|FUS_MOUSE	39.22	2	2	0		501000	1	1	1	0		52673	RNA-binding protein FUS OS=Mus musculus OX=10090 GN=Fus PE=1 SV=1
1427	2092	tr|Q8BQ46|Q8BQ46_MOUSE	39.22	2	2	0		501000	1	1	1	0		58601	TAF15 RNA polymerase II TATA box binding protein (TBP)-associated factor OS=Mus musculus OX=10090 GN=Taf15 PE=1 SV=1
927	2011	tr|E9PYI8|E9PYI8_MOUSE	39.08	2	2	2	863000	672000	1	1	1	1		52319	Ubiquitin carboxyl-terminal hydrolase 14 OS=Mus musculus OX=10090 GN=Usp14 PE=1 SV=1
927	2013	Q9JMA1|UBP14_MOUSE	39.08	2	2	2	863000	672000	1	1	1	1		56002	Ubiquitin carboxyl-terminal hydrolase 14 OS=Mus musculus OX=10090 GN=Usp14 PE=1 SV=3
1429	2028	tr|A0A087WRP4|A0A087WRP4_MOUSE	39.07	7	7	0		735000	1	1	1	0		15889	TAR DNA-binding protein 43 (Fragment) OS=Mus musculus OX=10090 GN=Tardbp PE=1 SV=1
1429	2029	tr|H3BJV1|H3BJV1_MOUSE	39.07	6	6	0		735000	1	1	1	0		15982	TAR DNA-binding protein 43 (Fragment) OS=Mus musculus OX=10090 GN=Tardbp PE=1 SV=2
1429	2034	tr|A0A087WSH7|A0A087WSH7_MOUSE	39.07	5	5	0		735000	1	1	1	0		19994	TAR DNA-binding protein 43 (Fragment) OS=Mus musculus OX=10090 GN=Tardbp PE=1 SV=1
1429	2037	tr|A0A087WQA5|A0A087WQA5_MOUSE	39.07	4	4	0		735000	1	1	1	0		22822	TAR DNA-binding protein 43 (Fragment) OS=Mus musculus OX=10090 GN=Tardbp PE=1 SV=1
1429	2041	tr|A0A087WR97|A0A087WR97_MOUSE	39.07	4	4	0		735000	1	1	1	0		26715	TAR DNA-binding protein 43 (Fragment) OS=Mus musculus OX=10090 GN=Tardbp PE=1 SV=1
1429	2047	tr|A0A087WRZ5|A0A087WRZ5_MOUSE	39.07	3	3	0		735000	1	1	1	0		32178	TAR DNA-binding protein 43 OS=Mus musculus OX=10090 GN=Tardbp PE=1 SV=1
1429	2049	tr|Q8R0B4|Q8R0B4_MOUSE	39.07	3	3	0		735000	1	1	1	0		33328	MCG16669 isoform CRA_a OS=Mus musculus OX=10090 GN=Tardbp PE=1 SV=1
1429	2050	tr|Q8BLD4|Q8BLD4_MOUSE	39.07	3	3	0		735000	1	1	1	0		33596	MCG16669 isoform CRA_f OS=Mus musculus OX=10090 GN=Tardbp PE=1 SV=1
1429	2051	tr|Q6VYI5|Q6VYI5_MOUSE	39.07	3	3	0		735000	1	1	1	0		34197	TAR DNA-binding protein 43 OS=Mus musculus OX=10090 GN=Tardbp PE=1 SV=1
1429	2052	tr|Q6VYI4|Q6VYI4_MOUSE	39.07	3	3	0		735000	1	1	1	0		34157	TAR DNA-binding protein 43 OS=Mus musculus OX=10090 GN=Tardbp PE=1 SV=1
1429	2072	Q921F2|TADBP_MOUSE	39.07	2	2	0		735000	1	1	1	0		44548	TAR DNA-binding protein 43 OS=Mus musculus OX=10090 GN=Tardbp PE=1 SV=1
1431	2055	tr|G3X971|G3X971_MOUSE	39.05	1	0	1	0		1	1	0	1		93376	Ankyrin 3 epithelial isoform CRA_i OS=Mus musculus OX=10090 GN=Ank3 PE=1 SV=1
1431	2056	tr|S4R1X7|S4R1X7_MOUSE	39.05	1	0	1	0		1	1	0	1		97757	Ankyrin-3 OS=Mus musculus OX=10090 GN=Ank3 PE=1 SV=1
1431	2063	tr|S4R2C1|S4R2C1_MOUSE	39.05	1	0	1	0		1	1	0	1		107031	Ankyrin-3 OS=Mus musculus OX=10090 GN=Ank3 PE=1 SV=1
1431	2065	tr|S4R187|S4R187_MOUSE	39.05	1	0	1	0		1	1	0	1		108905	Ankyrin-3 OS=Mus musculus OX=10090 GN=Ank3 PE=1 SV=1
1431	2067	tr|S4R2F5|S4R2F5_MOUSE	39.05	1	0	1	0		1	1	0	1		110958	Ankyrin-3 OS=Mus musculus OX=10090 GN=Ank3 PE=1 SV=1
1431	2068	tr|S4R2J6|S4R2J6_MOUSE	39.05	1	0	1	0		1	1	0	1		128445	Ankyrin-3 OS=Mus musculus OX=10090 GN=Ank3 PE=1 SV=1
1431	2069	tr|S4R165|S4R165_MOUSE	39.05	1	0	1	0		1	1	0	1		130319	Ankyrin-3 OS=Mus musculus OX=10090 GN=Ank3 PE=1 SV=1
1431	2070	tr|S4R236|S4R236_MOUSE	39.05	1	0	1	0		1	1	0	1		130754	Ankyrin-3 (Fragment) OS=Mus musculus OX=10090 GN=Ank3 PE=1 SV=1
1431	2089	tr|A0A1W2P812|A0A1W2P812_MOUSE	39.05	1	0	1	0		1	1	0	1		191254	Ankyrin-3 OS=Mus musculus OX=10090 GN=Ank3 PE=1 SV=1
1431	2091	tr|S4R1S2|S4R1S2_MOUSE	39.05	1	0	1	0		1	1	0	1		197497	Ankyrin-3 OS=Mus musculus OX=10090 GN=Ank3 PE=1 SV=1
1431	2093	tr|G5E8K2|G5E8K2_MOUSE	39.05	1	0	1	0		1	1	0	1		211798	Ankyrin 3 epithelial isoform CRA_l OS=Mus musculus OX=10090 GN=Ank3 PE=1 SV=1
1431	2094	tr|G5E8K3|G5E8K3_MOUSE	39.05	1	0	1	0		1	1	0	1		211930	Ankyrin 3 epithelial isoform CRA_b OS=Mus musculus OX=10090 GN=Ank3 PE=1 SV=1
1431	2095	G5E8K5|ANK3_MOUSE	39.05	1	0	1	0		1	1	0	1		214061	Ankyrin-3 OS=Mus musculus OX=10090 GN=Ank3 PE=1 SV=1
1431	2097	tr|S4R2S8|S4R2S8_MOUSE	39.05	1	0	1	0		1	1	0	1		216908	Ankyrin-3 OS=Mus musculus OX=10090 GN=Ank3 PE=1 SV=1
1431	2109	tr|S4R2K9|S4R2K9_MOUSE	39.05	0	0	0	0		1	1	0	1		284642	Ankyrin-3 (Fragment) OS=Mus musculus OX=10090 GN=Ank3 PE=1 SV=1
1431	2111	tr|A0A087WNU5|A0A087WNU5_MOUSE	39.05	0	0	0	0		1	1	0	1		315545	Ankyrin-3 (Fragment) OS=Mus musculus OX=10090 GN=Ank3 PE=1 SV=1
928	2012	P26883|FKB1A_MOUSE	38.9	12	12	12	2340000	0	1	1	1	1		11923	Peptidyl-prolyl cis-trans isomerase FKBP1A OS=Mus musculus OX=10090 GN=Fkbp1a PE=1 SV=2
930	2017	tr|H3BJA6|H3BJA6_MOUSE	38.87	4	4	4	189000	217000	1	1	1	1		25792	Protein phosphatase 1 regulatory subunit 9A (Fragment) OS=Mus musculus OX=10090 GN=Ppp1r9a PE=1 SV=1
930	2033	tr|Q3UXW4|Q3UXW4_MOUSE	38.87	2	2	2	189000	217000	1	1	1	1		70778	Protein phosphatase 1 regulatory subunit 9A OS=Mus musculus OX=10090 GN=Ppp1r9a PE=1 SV=1
930	2039	Q6R891|NEB2_MOUSE	38.87	1	1	1	189000	217000	1	1	1	1		89520	Neurabin-2 OS=Mus musculus OX=10090 GN=Ppp1r9b PE=1 SV=1
930	2040	tr|H3BKQ7|H3BKQ7_MOUSE	38.87	1	1	1	189000	217000	1	1	1	1		107170	Protein phosphatase 1 regulatory subunit 9A OS=Mus musculus OX=10090 GN=Ppp1r9a PE=1 SV=1
930	2042	tr|H3BJD0|H3BJD0_MOUSE	38.87	1	1	1	189000	217000	1	1	1	1		109559	Protein phosphatase 1 regulatory subunit 9A OS=Mus musculus OX=10090 GN=Ppp1r9a PE=1 SV=1
930	2045	tr|H3BL28|H3BL28_MOUSE	38.87	1	1	1	189000	217000	1	1	1	1		116478	Protein phosphatase 1 regulatory subunit 9A (Fragment) OS=Mus musculus OX=10090 GN=Ppp1r9a PE=1 SV=1
930	2046	tr|Q7TN74|Q7TN74_MOUSE	38.87	1	1	1	189000	217000	1	1	1	1		122954	Neurabin I OS=Mus musculus OX=10090 GN=Ppp1r9a PE=1 SV=1
930	2054	tr|H3BJD6|H3BJD6_MOUSE	38.87	1	1	1	189000	217000	1	1	1	1		144401	Protein phosphatase 1 regulatory subunit 9A OS=Mus musculus OX=10090 GN=Ppp1r9a PE=1 SV=1
929	2014	Q8BI08|MAL2_MOUSE	38.86	6	6	6	2900000	3030000	1	1	1	1		19094	Protein MAL2 OS=Mus musculus OX=10090 GN=Mal2 PE=1 SV=1
594	1482	Q3U1J4|DDB1_MOUSE	38.8	1	1	0		405000	1	1	1	0		126853	DNA damage-binding protein 1 OS=Mus musculus OX=10090 GN=Ddb1 PE=1 SV=2
857	1365	tr|Q921R2|Q921R2_MOUSE	38.78	10	5	5		0	2	1	1	1		16142	40S ribosomal protein S13 OS=Mus musculus OX=10090 GN=Rps13 PE=1 SV=1
857	1366	P62301|RS13_MOUSE	38.78	9	5	5		0	2	1	1	1		17222	40S ribosomal protein S13 OS=Mus musculus OX=10090 GN=Rps13 PE=1 SV=2
932	2043	tr|B8JKK2|B8JKK2_MOUSE	38.7	15	15	15	571000	524000	1	1	1	1		12650	Ribosomal protein L15 (Fragment) OS=Mus musculus OX=10090 GN=Rpl15 PE=1 SV=1
932	2044	Q9CZM2|RL15_MOUSE	38.7	8	8	8	571000	524000	1	1	1	1		24146	60S ribosomal protein L15 OS=Mus musculus OX=10090 GN=Rpl15 PE=1 SV=4
1430	2035	Q9WV34|MPP2_MOUSE	38.66	2	2	0		615000	1	1	1	0		61555	MAGUK p55 subfamily member 2 OS=Mus musculus OX=10090 GN=Mpp2 PE=1 SV=1
655	873	Q06138|CAB39_MOUSE	38.53	4	0	4	198000		2	1	0	2		39843	Calcium-binding protein 39 OS=Mus musculus OX=10090 GN=Cab39 PE=1 SV=2
939	2123	tr|A0A338P797|A0A338P797_MOUSE	38.39	7	7	7	1830000	1380000	1	1	1	1		13187	Carbonyl reductase [NADPH] 3 OS=Mus musculus OX=10090 GN=Cbr3 PE=1 SV=1
939	2127	tr|A0A338P684|A0A338P684_MOUSE	38.39	6	6	6	1830000	1380000	1	1	1	1		14888	Carbonyl reductase [NADPH] 1 OS=Mus musculus OX=10090 GN=Cbr1 PE=1 SV=1
939	2155	Q8K354|CBR3_MOUSE	38.39	3	3	3	1830000	1380000	1	1	1	1		30953	Carbonyl reductase [NADPH] 3 OS=Mus musculus OX=10090 GN=Cbr3 PE=1 SV=1
939	2154	P48758|CBR1_MOUSE	38.39	3	3	3	1830000	1380000	1	1	1	1		30641	Carbonyl reductase [NADPH] 1 OS=Mus musculus OX=10090 GN=Cbr1 PE=1 SV=3
931	2021	tr|A0A1W2P720|A0A1W2P720_MOUSE	38.35	14	14	14	964000	1110000	1	1	1	1		9091	GTP-binding protein SAR1a (Fragment) OS=Mus musculus OX=10090 GN=Sar1a PE=1 SV=1
931	2022	tr|A0A1W2P869|A0A1W2P869_MOUSE	38.35	12	12	12	964000	1110000	1	1	1	1		10553	GTP-binding protein SAR1a (Fragment) OS=Mus musculus OX=10090 GN=Sar1a PE=1 SV=1
931	2023	tr|A0A1W2P6N3|A0A1W2P6N3_MOUSE	38.35	8	8	8	964000	1110000	1	1	1	1		14744	GTP-binding protein SAR1a (Fragment) OS=Mus musculus OX=10090 GN=Sar1a PE=1 SV=1
931	2027	tr|Q99JZ4|Q99JZ4_MOUSE	38.35	6	6	6	964000	1110000	1	1	1	1		22399	GTP-binding protein SAR1a OS=Mus musculus OX=10090 GN=Sar1a PE=1 SV=1
931	2026	P36536|SAR1A_MOUSE	38.35	6	6	6	964000	1110000	1	1	1	1		22371	GTP-binding protein SAR1a OS=Mus musculus OX=10090 GN=Sar1a PE=1 SV=1
931	2025	Q9CQC9|SAR1B_MOUSE	38.35	6	6	6	964000	1110000	1	1	1	1		22382	GTP-binding protein SAR1b OS=Mus musculus OX=10090 GN=Sar1b PE=1 SV=1
1428	2024	tr|G3UXC5|G3UXC5_MOUSE	38.34	14	14	0		79700	1	1	1	0	Carbamidomethylation	9212	Xaa-Pro dipeptidase (Fragment) OS=Mus musculus OX=10090 GN=Pepd PE=1 SV=1
1428	2032	Q11136|PEPD_MOUSE	38.34	2	2	0		79700	1	1	1	0	Carbamidomethylation	55029	Xaa-Pro dipeptidase OS=Mus musculus OX=10090 GN=Pepd PE=1 SV=3
934	2066	Q9D898|ARP5L_MOUSE	38.32	8	8	8	701000	730000	1	1	1	1		16980	Actin-related protein 2/3 complex subunit 5-like protein OS=Mus musculus OX=10090 GN=Arpc5l PE=1 SV=1
938	2112	Q9D0F9|PGM1_MOUSE	38.27	2	2	2	761000	733000	1	1	1	1		61418	Phosphoglucomutase-1 OS=Mus musculus OX=10090 GN=Pgm1 PE=1 SV=4
938	2113	Q8BZF8|PGM5_MOUSE	38.27	2	2	2	761000	733000	1	1	1	1		62220	Phosphoglucomutase-like protein 5 OS=Mus musculus OX=10090 GN=Pgm5 PE=1 SV=2
938	2119	tr|A2CEK3|A2CEK3_MOUSE	38.27	2	2	2	761000	733000	1	1	1	1		63748	Phosphoglucomutase-1 OS=Mus musculus OX=10090 GN=Pgm1 PE=1 SV=1
933	2057	tr|A0A0G2JED9|A0A0G2JED9_MOUSE	38.21	10	10	10	9090000	11800000	1	1	1	1		12370	Ras-related protein Rap-1A (Fragment) OS=Mus musculus OX=10090 GN=Rap1a PE=1 SV=1
933	2058	tr|A0A0G2JDL9|A0A0G2JDL9_MOUSE	38.21	9	9	9	9090000	11800000	1	1	1	1		13426	MCG10748 isoform CRA_b OS=Mus musculus OX=10090 GN=Rap1a PE=1 SV=1
933	2060	tr|A0A0G2JE52|A0A0G2JE52_MOUSE	38.21	7	7	7	9090000	11800000	1	1	1	1		17992	Ras-related protein Rap-1A OS=Mus musculus OX=10090 GN=Rap1a PE=1 SV=1
933	2062	Q99JI6|RAP1B_MOUSE	38.21	6	6	6	9090000	11800000	1	1	1	1		20825	Ras-related protein Rap-1b OS=Mus musculus OX=10090 GN=Rap1b PE=1 SV=2
933	2061	P62835|RAP1A_MOUSE	38.21	6	6	6	9090000	11800000	1	1	1	1		20987	Ras-related protein Rap-1A OS=Mus musculus OX=10090 GN=Rap1a PE=1 SV=1
1432	2087	tr|D3YUP9|D3YUP9_MOUSE	38.09	2	0	2	104000		1	1	0	1	Carbamidomethylation	99559	Disintegrin and metalloproteinase domain-containing protein 22 OS=Mus musculus OX=10090 GN=Adam22 PE=1 SV=1
1432	2088	Q9R1V6|ADA22_MOUSE	38.09	2	0	2	104000		1	1	0	1	Carbamidomethylation	99715	Disintegrin and metalloproteinase domain-containing protein 22 OS=Mus musculus OX=10090 GN=Adam22 PE=1 SV=2
585	1389	P61161|ARP2_MOUSE	38.03	3	3	3	1110000	865000	1	1	1	1		44761	Actin-related protein 2 OS=Mus musculus OX=10090 GN=Actr2 PE=1 SV=1
946	2144	tr|F8WGB3|F8WGB3_MOUSE	38.02	6	6	6	2210000	2000000	1	1	1	1		14510	Succinate dehydrogenase cytochrome b560 subunit mitochondrial OS=Mus musculus OX=10090 GN=Sdhc PE=1 SV=1
946	2149	Q9CZB0|C560_MOUSE	38.02	5	5	5	2210000	2000000	1	1	1	1		18382	Succinate dehydrogenase cytochrome b560 subunit mitochondrial OS=Mus musculus OX=10090 GN=Sdhc PE=1 SV=1
942	2134	tr|B1ARA3|B1ARA3_MOUSE	38.01	8	8	8	1900000	0	1	1	1	1		12217	60S ribosomal protein L26 (Fragment) OS=Mus musculus OX=10090 GN=Rpl26 PE=1 SV=1
942	2148	P61255|RL26_MOUSE	38.01	6	6	6	1900000	0	1	1	1	1		17258	60S ribosomal protein L26 OS=Mus musculus OX=10090 GN=Rpl26 PE=1 SV=1
1434	2121	Q9D8Y0|EFHD2_MOUSE	38	4	0	4	1190000		1	1	0	1		26791	EF-hand domain-containing protein D2 OS=Mus musculus OX=10090 GN=Efhd2 PE=1 SV=1
1434	2120	tr|Q8C845|Q8C845_MOUSE	38	4	0	4	1190000		1	1	0	1		26800	EF-hand domain-containing protein D2 OS=Mus musculus OX=10090 GN=Efhd2 PE=1 SV=1
706	1367	tr|E9Q1V0|E9Q1V0_MOUSE	37.93	11	0	11	228000		1	1	0	1		14245	Hsc70-interacting protein (Fragment) OS=Mus musculus OX=10090 GN=St13 PE=1 SV=1
706	1368	tr|F8WJK8|F8WJK8_MOUSE	37.93	4	0	4	228000		1	1	0	1		40539	Hsc70-interacting protein OS=Mus musculus OX=10090 GN=St13 PE=1 SV=1
706	1369	Q99L47|F10A1_MOUSE	37.93	4	0	4	228000		1	1	0	1		41656	Hsc70-interacting protein OS=Mus musculus OX=10090 GN=St13 PE=1 SV=1
936	2101	tr|F6Q8P7|F6Q8P7_MOUSE	37.83	10	10	10	0	360000	1	1	1	1		12004	Phospholipid-transporting ATPase IA (Fragment) OS=Mus musculus OX=10090 GN=Atp8a1 PE=1 SV=2
936	2102	tr|E9Q4J5|E9Q4J5_MOUSE	37.83	9	9	9	0	360000	1	1	1	1		14067	Phospholipid-transporting ATPase IA OS=Mus musculus OX=10090 GN=Atp8a1 PE=1 SV=1
936	2103	tr|Q3U9N5|Q3U9N5_MOUSE	37.83	6	6	6	0	360000	1	1	1	1		20069	Phospholipid-transporting ATPase IA OS=Mus musculus OX=10090 GN=Atp8a1 PE=1 SV=1
936	2104	tr|A0A0J9YV34|A0A0J9YV34_MOUSE	37.83	2	2	2	0	360000	1	1	1	1		49805	Phospholipid-transporting ATPase OS=Mus musculus OX=10090 GN=Atp8a1 PE=1 SV=1
936	2108	P70704|AT8A1_MOUSE	37.83	1	1	1	0	360000	1	1	1	1		131413	Phospholipid-transporting ATPase IA OS=Mus musculus OX=10090 GN=Atp8a1 PE=1 SV=2
936	2107	tr|A0A0M3HEP7|A0A0M3HEP7_MOUSE	37.83	1	1	1	0	360000	1	1	1	1		131508	Phospholipid-transporting ATPase OS=Mus musculus OX=10090 GN=Atp8a1 PE=1 SV=1
948	2150	Q9JKW0|AR6P1_MOUSE	37.81	4	4	4	252000	271000	1	1	1	1		23437	ADP-ribosylation factor-like protein 6-interacting protein 1 OS=Mus musculus OX=10090 GN=Arl6ip1 PE=1 SV=1
1433	2114	tr|F6VE93|F6VE93_MOUSE	37.49	6	0	6	0		1	1	0	1		28332	Neuroligin-2 (Fragment) OS=Mus musculus OX=10090 GN=Nlgn2 PE=1 SV=1
1433	2115	tr|E9QK34|E9QK34_MOUSE	37.49	2	0	2	0		1	1	0	1		91009	Neuroligin-1 OS=Mus musculus OX=10090 GN=Nlgn1 PE=1 SV=1
1433	2116	Q69ZK9|NLGN2_MOUSE	37.49	2	0	2	0		1	1	0	1		90989	Neuroligin-2 OS=Mus musculus OX=10090 GN=Nlgn2 PE=1 SV=2
1433	2117	Q99K10|NLGN1_MOUSE	37.49	2	0	2	0		1	1	0	1		94149	Neuroligin-1 OS=Mus musculus OX=10090 GN=Nlgn1 PE=1 SV=2
1433	2118	B0F2B4|NLGN4_MOUSE	37.49	2	0	2	0		1	1	0	1		97348	Neuroligin 4-like OS=Mus musculus OX=10090 GN=Nlgn4l PE=1 SV=1
1435	2122	O08547|SC22B_MOUSE	37.45	5	0	5	6550000		1	1	0	1		24741	Vesicle-trafficking protein SEC22b OS=Mus musculus OX=10090 GN=Sec22b PE=1 SV=3
943	2136	tr|E9Q6P1|E9Q6P1_MOUSE	37.2	6	6	6	1950000	1670000	1	1	1	1		16832	Phosphoserine aminotransferase (Fragment) OS=Mus musculus OX=10090 GN=Psat1 PE=1 SV=1
943	2138	tr|Q3U6K9|Q3U6K9_MOUSE	37.2	3	3	3	1950000	1670000	1	1	1	1		40176	Phosphoserine aminotransferase OS=Mus musculus OX=10090 GN=Psat1 PE=1 SV=1
943	2139	Q99K85|SERC_MOUSE	37.2	3	3	3	1950000	1670000	1	1	1	1		40473	Phosphoserine aminotransferase OS=Mus musculus OX=10090 GN=Psat1 PE=1 SV=1
1436	2147	tr|A0A2I3BPG9|A0A2I3BPG9_MOUSE	37.13	8	0	8	290000		1	1	0	1	Carbamidomethylation	12455	MCG113838 OS=Mus musculus OX=10090 GN=Rpl36a-ps1 PE=3 SV=1
1436	2146	P83882|RL36A_MOUSE	37.13	8	0	8	290000		1	1	0	1	Carbamidomethylation	12441	60S ribosomal protein L36a OS=Mus musculus OX=10090 GN=Rpl36a PE=3 SV=2
944	2137	Q4VAE3|TMM65_MOUSE	37.05	5	5	5	665000	737000	1	1	1	1		24918	Transmembrane protein 65 OS=Mus musculus OX=10090 GN=Tmem65 PE=1 SV=1
1437	2151	Q9CT10|RANB3_MOUSE	36.93	2	0	2	0		1	1	0	1		52573	Ran-binding protein 3 OS=Mus musculus OX=10090 GN=Ranbp3 PE=1 SV=2
1437	2152	tr|A0A3B2WCL5|A0A3B2WCL5_MOUSE	36.93	2	0	2	0		1	1	0	1		59331	RAN binding protein 3 isoform CRA_i OS=Mus musculus OX=10090 GN=Ranbp3 PE=1 SV=1
947	2145	Q99JG2|G37L1_MOUSE	36.91	2	2	2	1730000	1680000	1	1	1	1		52729	G-protein coupled receptor 37-like 1 OS=Mus musculus OX=10090 GN=Gpr37l1 PE=1 SV=2
945	2140	tr|A0A0U1RP13|A0A0U1RP13_MOUSE	36.79	7	7	7	247000	175000	1	1	1	1		20292	CDP-diacylglycerol--inositol 3-phosphatidyltransferase OS=Mus musculus OX=10090 GN=Cdipt PE=1 SV=1
945	2141	Q8VDP6|CDIPT_MOUSE	36.79	6	6	6	247000	175000	1	1	1	1		23599	CDP-diacylglycerol--inositol 3-phosphatidyltransferase OS=Mus musculus OX=10090 GN=Cdipt PE=1 SV=1
530	877	P55066|NCAN_MOUSE	36.78	1	1	1	2100000	1470000	1	1	1	1		137200	Neurocan core protein OS=Mus musculus OX=10090 GN=Ncan PE=1 SV=1
530	876	tr|A0A0R4IZX5|A0A0R4IZX5_MOUSE	36.78	1	1	1	2100000	1470000	1	1	1	1		137175	Neurocan core protein OS=Mus musculus OX=10090 GN=Ncan PE=1 SV=1
1440	2212	tr|Q3KQM4|Q3KQM4_MOUSE	36.62	3	0	3	82600		1	1	0	1		33902	U2 snRNP auxiliary factor large subunit OS=Mus musculus OX=10090 GN=U2af2 PE=1 SV=1
1440	2224	tr|Q80XR5|Q80XR5_MOUSE	36.62	2	0	2	82600		1	1	0	1		53121	U2 snRNP auxiliary factor large subunit OS=Mus musculus OX=10090 GN=U2af2 PE=1 SV=1
1440	2225	P26369|U2AF2_MOUSE	36.62	2	0	2	82600		1	1	0	1		53517	Splicing factor U2AF 65 kDa subunit OS=Mus musculus OX=10090 GN=U2af2 PE=1 SV=3
949	2159	O70435|PSA3_MOUSE	36.47	5	5	5	657000	863000	1	1	1	1		28405	Proteasome subunit alpha type-3 OS=Mus musculus OX=10090 GN=Psma3 PE=1 SV=3
955	2198	tr|A0A0A6YY28|A0A0A6YY28_MOUSE	36.45	4	4	4	103000	0	1	1	1	1		23131	cAMP-dependent protein kinase type II-alpha regulatory subunit (Fragment) OS=Mus musculus OX=10090 GN=Prkar2a PE=1 SV=1
955	2217	tr|A0A0A6YX73|A0A0A6YX73_MOUSE	36.45	2	2	2	103000	0	1	1	1	1		43166	cAMP-dependent protein kinase type II-alpha regulatory subunit OS=Mus musculus OX=10090 GN=Prkar2a PE=1 SV=1
955	2220	P12367|KAP2_MOUSE	36.45	2	2	2	103000	0	1	1	1	1		45389	cAMP-dependent protein kinase type II-alpha regulatory subunit OS=Mus musculus OX=10090 GN=Prkar2a PE=1 SV=2
955	2221	tr|Q8K1M3|Q8K1M3_MOUSE	36.45	2	2	2	103000	0	1	1	1	1		45589	Protein kinase cAMP dependent regulatory type II alpha OS=Mus musculus OX=10090 GN=Prkar2a PE=1 SV=1
723	1505	P16054|KPCE_MOUSE	35.99	1	1	1	132000	133000	1	1	1	1		83561	Protein kinase C epsilon type OS=Mus musculus OX=10090 GN=Prkce PE=1 SV=1
1439	2201	Q61330|CNTN2_MOUSE	35.94	1	1	0		110000	1	1	1	0		113217	Contactin-2 OS=Mus musculus OX=10090 GN=Cntn2 PE=1 SV=2
950	2164	P47746|CNR1_MOUSE	35.83	2	2	2	604000	628000	1	1	1	1		52831	Cannabinoid receptor 1 OS=Mus musculus OX=10090 GN=Cnr1 PE=1 SV=1
586	1392	tr|A0A0N4SV66|A0A0N4SV66_MOUSE	35.76	7	7	7	17700000	15700000	1	1	1	1		13660	Histone H2A OS=Mus musculus OX=10090 GN=H2afj PE=1 SV=1
586	1393	Q8CGP6|H2A1H_MOUSE	35.76	7	7	7	17700000	15700000	1	1	1	1		13950	Histone H2A type 1-H OS=Mus musculus OX=10090 GN=Hist1h2ah PE=1 SV=3
586	1396	Q64523|H2A2C_MOUSE	35.76	7	7	7	17700000	15700000	1	1	1	1		13988	Histone H2A type 2-C OS=Mus musculus OX=10090 GN=Hist2h2ac PE=1 SV=3
586	1395	Q8R1M2|H2AJ_MOUSE	35.76	7	7	7	17700000	15700000	1	1	1	1		14045	Histone H2A.J OS=Mus musculus OX=10090 GN=H2afj PE=1 SV=1
586	1394	tr|Q8CGP4|Q8CGP4_MOUSE	35.76	7	7	7	17700000	15700000	1	1	1	1		14056	Histone H2A OS=Mus musculus OX=10090 GN=Hist1h2aa PE=1 SV=1
586	1410	C0HKE8|H2A1O_MOUSE	35.76	7	7	7	17700000	15700000	1	1	1	1		14135	Histone H2A type 1-O OS=Mus musculus OX=10090 GN=Hist1h2ao PE=1 SV=1
586	1409	C0HKE2|H2A1C_MOUSE	35.76	7	7	7	17700000	15700000	1	1	1	1		14135	Histone H2A type 1-C OS=Mus musculus OX=10090 GN=Hist1h2ac PE=1 SV=1
586	1408	C0HKE1|H2A1B_MOUSE	35.76	7	7	7	17700000	15700000	1	1	1	1		14135	Histone H2A type 1-B OS=Mus musculus OX=10090 GN=Hist1h2ab PE=1 SV=1
586	1407	C0HKE4|H2A1E_MOUSE	35.76	7	7	7	17700000	15700000	1	1	1	1		14135	Histone H2A type 1-E OS=Mus musculus OX=10090 GN=Hist1h2ae PE=1 SV=1
586	1406	Q8CGP7|H2A1K_MOUSE	35.76	7	7	7	17700000	15700000	1	1	1	1		14150	Histone H2A type 1-K OS=Mus musculus OX=10090 GN=Hist1h2ak PE=1 SV=3
586	1405	C0HKE6|H2A1I_MOUSE	35.76	7	7	7	17700000	15700000	1	1	1	1		14135	Histone H2A type 1-I OS=Mus musculus OX=10090 GN=Hist1h2ai PE=1 SV=1
586	1404	C0HKE3|H2A1D_MOUSE	35.76	7	7	7	17700000	15700000	1	1	1	1		14135	Histone H2A type 1-D OS=Mus musculus OX=10090 GN=Hist1h2ad PE=1 SV=1
586	1403	Q64522|H2A2B_MOUSE	35.76	7	7	7	17700000	15700000	1	1	1	1		14013	Histone H2A type 2-B OS=Mus musculus OX=10090 GN=Hist2h2ab PE=1 SV=3
586	1402	C0HKE7|H2A1N_MOUSE	35.76	7	7	7	17700000	15700000	1	1	1	1		14135	Histone H2A type 1-N OS=Mus musculus OX=10090 GN=Hist1h2an PE=1 SV=1
586	1401	C0HKE5|H2A1G_MOUSE	35.76	7	7	7	17700000	15700000	1	1	1	1		14135	Histone H2A type 1-G OS=Mus musculus OX=10090 GN=Hist1h2ag PE=1 SV=1
586	1400	Q8CGP5|H2A1F_MOUSE	35.76	7	7	7	17700000	15700000	1	1	1	1		14162	Histone H2A type 1-F OS=Mus musculus OX=10090 GN=Hist1h2af PE=1 SV=3
586	1399	C0HKE9|H2A1P_MOUSE	35.76	7	7	7	17700000	15700000	1	1	1	1		14135	Histone H2A type 1-P OS=Mus musculus OX=10090 GN=Hist1h2ap PE=1 SV=1
586	1398	Q8BFU2|H2A3_MOUSE	35.76	7	7	7	17700000	15700000	1	1	1	1		14121	Histone H2A type 3 OS=Mus musculus OX=10090 GN=Hist3h2a PE=1 SV=3
586	1397	Q6GSS7|H2A2A_MOUSE	35.76	7	7	7	17700000	15700000	1	1	1	1		14095	Histone H2A type 2-A OS=Mus musculus OX=10090 GN=Hist2h2aa1 PE=1 SV=3
586	1411	P27661|H2AX_MOUSE	35.76	6	6	6	17700000	15700000	1	1	1	1		15143	Histone H2AX OS=Mus musculus OX=10090 GN=H2afx PE=1 SV=2
417	1479	P14131|RS16_MOUSE	35.73	7	7	7	1210000	695000	1	1	2	2		16445	40S ribosomal protein S16 OS=Mus musculus OX=10090 GN=Rps16 PE=1 SV=4
707	1372	tr|D3YZ62|D3YZ62_MOUSE	35.73	1	1	0		0	1	1	1	0		212334	Unconventional myosin-Va OS=Mus musculus OX=10090 GN=Myo5a PE=1 SV=1
707	1373	Q99104|MYO5A_MOUSE	35.73	1	1	0		0	1	1	1	0		215536	Unconventional myosin-Va OS=Mus musculus OX=10090 GN=Myo5a PE=1 SV=2
707	1374	tr|D3Z4J3|D3Z4J3_MOUSE	35.73	1	1	0		0	1	1	1	0		215523	Unconventional myosin-Va OS=Mus musculus OX=10090 GN=Myo5a PE=1 SV=1
401	879	tr|Q5PR72|Q5PR72_MOUSE	35.6	1	1	1	384000	320000	1	1	1	1	Carbamidomethylation	105246	Phosphodiesterase OS=Mus musculus OX=10090 GN=Pde2a PE=1 SV=1
401	880	Q922S4|PDE2A_MOUSE	35.6	1	1	1	384000	320000	1	1	1	1	Carbamidomethylation	105619	cGMP-dependent 3' 5'-cyclic phosphodiesterase OS=Mus musculus OX=10090 GN=Pde2a PE=1 SV=4
401	881	tr|A0A1B0GRJ9|A0A1B0GRJ9_MOUSE	35.6	1	1	1	384000	320000	1	1	1	1	Carbamidomethylation	106356	Phosphodiesterase OS=Mus musculus OX=10090 GN=Pde2a PE=1 SV=1
401	882	tr|F7D3W5|F7D3W5_MOUSE	35.6	1	1	1	384000	320000	1	1	1	1	Carbamidomethylation	107694	Phosphodiesterase OS=Mus musculus OX=10090 GN=Gm45837 PE=1 SV=1
710	1420	P54227|STMN1_MOUSE	35.48	7	7	7	0	240000	1	1	1	1	Deamidation N	17274	Stathmin OS=Mus musculus OX=10090 GN=Stmn1 PE=1 SV=2
951	2171	tr|E0CX19|E0CX19_MOUSE	35.48	3	3	0		440000	1	1	1	0		34594	3-hydroxyisobutyryl-CoA hydrolase mitochondrial OS=Mus musculus OX=10090 GN=Hibch PE=1 SV=1
951	2172	Q8QZS1|HIBCH_MOUSE	35.48	3	3	0		440000	1	1	1	0		43038	3-hydroxyisobutyryl-CoA hydrolase mitochondrial OS=Mus musculus OX=10090 GN=Hibch PE=1 SV=1
952	2176	tr|A0A0U1RNK9|A0A0U1RNK9_MOUSE	35.29	6	6	6	1560000	1620000	1	1	1	1		19282	Electron transfer flavoprotein subunit beta (Fragment) OS=Mus musculus OX=10090 GN=Etfb PE=1 SV=2
952	2175	tr|A0A0U1RNR3|A0A0U1RNR3_MOUSE	35.29	6	6	6	1560000	1620000	1	1	1	1		19202	Electron transfer flavoprotein subunit beta (Fragment) OS=Mus musculus OX=10090 GN=Etfb PE=4 SV=2
952	2177	tr|A0A0U1RNP5|A0A0U1RNP5_MOUSE	35.29	5	5	5	1560000	1620000	1	1	1	1		23481	Electron transfer flavoprotein subunit beta (Fragment) OS=Mus musculus OX=10090 GN=Etfb PE=4 SV=1
952	2178	tr|A0A0N4SVE0|A0A0N4SVE0_MOUSE	35.29	5	5	5	1560000	1620000	1	1	1	1		24125	Electron transferring flavoprotein beta polypeptide-like OS=Mus musculus OX=10090 GN=Etfbl PE=4 SV=1
952	2179	Q9DCW4|ETFB_MOUSE	35.29	4	4	4	1560000	1620000	1	1	1	1		27623	Electron transfer flavoprotein subunit beta OS=Mus musculus OX=10090 GN=Etfb PE=1 SV=3
953	2181	Q9ERS2|NDUAD_MOUSE	35.05	6	6	6	2690000	2920000	1	1	1	1		16860	NADH dehydrogenase [ubiquinone] 1 alpha subcomplex subunit 13 OS=Mus musculus OX=10090 GN=Ndufa13 PE=1 SV=3
954	2184	O35857|TIM44_MOUSE	35.02	2	2	2	106000	139000	1	1	1	1		51091	Mitochondrial import inner membrane translocase subunit TIM44 OS=Mus musculus OX=10090 GN=Timm44 PE=1 SV=2
1438	2187	O55126|NIPS2_MOUSE	34.91	4	4	0		0	1	1	1	0		32933	Protein NipSnap homolog 2 OS=Mus musculus OX=10090 GN=Nipsnap2 PE=1 SV=1
1438	2186	tr|Q7TMG8|Q7TMG8_MOUSE	34.91	4	4	0		0	1	1	1	0		32899	Glioblastoma amplified sequence OS=Mus musculus OX=10090 GN=Nipsnap2 PE=1 SV=1
956	2208	Q9CQR4|ACO13_MOUSE	34.31	7	7	7	0	0	1	1	1	1		15183	Acyl-coenzyme A thioesterase 13 OS=Mus musculus OX=10090 GN=Acot13 PE=1 SV=1
962	2244	Q91YQ5|RPN1_MOUSE	34.13	1	1	1	282000	244000	1	1	1	1		68528	Dolichyl-diphosphooligosaccharide--protein glycosyltransferase subunit 1 OS=Mus musculus OX=10090 GN=Rpn1 PE=1 SV=1
858	1388	Q9R0Q6|ARC1A_MOUSE	34.09	2	2	0		1680000	1	1	1	0	Carbamidomethylation	41626	Actin-related protein 2/3 complex subunit 1A OS=Mus musculus OX=10090 GN=Arpc1a PE=1 SV=1
959	2237	Q07076|ANXA7_MOUSE	33.96	2	2	2	626000	641000	1	1	1	1		49925	Annexin A7 OS=Mus musculus OX=10090 GN=Anxa7 PE=1 SV=2
959	2238	tr|A0A2C9F2D2|A0A2C9F2D2_MOUSE	33.96	2	2	2	626000	641000	1	1	1	1		52271	Annexin OS=Mus musculus OX=10090 GN=Anxa7 PE=1 SV=1
1441	2235	P60867|RS20_MOUSE	33.81	10	0	10	2780000		1	1	0	1		13373	40S ribosomal protein S20 OS=Mus musculus OX=10090 GN=Rps20 PE=1 SV=1
960	2241	P03888|NU1M_MOUSE	33.39	3	3	3	886000	941000	1	1	1	1		36059	NADH-ubiquinone oxidoreductase chain 1 OS=Mus musculus OX=10090 GN=Mtnd1 PE=1 SV=3
1444	2288	tr|B1AT92|B1AT92_MOUSE	33.37	3	0	3	151000		1	1	0	1		23588	Growth factor receptor-bound protein 2 OS=Mus musculus OX=10090 GN=Grb2 PE=1 SV=1
1444	2294	Q60631|GRB2_MOUSE	33.37	3	0	3	151000		1	1	0	1		25238	Growth factor receptor-bound protein 2 OS=Mus musculus OX=10090 GN=Grb2 PE=1 SV=1
958	2234	Q9R1P3|PSB2_MOUSE	33.14	4	4	4	688000	708000	1	1	1	1		22906	Proteasome subunit beta type-2 OS=Mus musculus OX=10090 GN=Psmb2 PE=1 SV=1
957	2229	P29758|OAT_MOUSE	33.09	2	2	2	362000	311000	1	1	1	1		48355	Ornithine aminotransferase mitochondrial OS=Mus musculus OX=10090 GN=Oat PE=1 SV=1
1443	2262	tr|E9Q6A9|E9Q6A9_MOUSE	33.01	1	1	0		365000	1	1	1	0		66562	Catenin beta-1 OS=Mus musculus OX=10090 GN=Ctnnb1 PE=1 SV=1
1443	2281	Q02257|PLAK_MOUSE	33.01	1	1	0		365000	1	1	1	0		81801	Junction plakoglobin OS=Mus musculus OX=10090 GN=Jup PE=1 SV=3
1443	2283	Q02248|CTNB1_MOUSE	33.01	1	1	0		365000	1	1	1	0		85471	Catenin beta-1 OS=Mus musculus OX=10090 GN=Ctnnb1 PE=1 SV=1
712	1364	Q9D1A2|CNDP2_MOUSE	32.85	2	2	2	846000	911000	1	1	1	1		52767	Cytosolic non-specific dipeptidase OS=Mus musculus OX=10090 GN=Cndp2 PE=1 SV=1
862	1428	Q8K212|PACS1_MOUSE	32.79	1	1	0		124000	1	1	1	0		104829	Phosphofurin acidic cluster sorting protein 1 OS=Mus musculus OX=10090 GN=Pacs1 PE=1 SV=2
869	1497	P27546|MAP4_MOUSE	32.68	1	0	1	0		1	1	0	1		117429	Microtubule-associated protein 4 OS=Mus musculus OX=10090 GN=Map4 PE=1 SV=3
1442	2245	Q91VI7|RINI_MOUSE	32.68	2	0	2	0		1	1	0	1		49817	Ribonuclease inhibitor OS=Mus musculus OX=10090 GN=Rnh1 PE=1 SV=1
1442	2246	tr|A0A1B0GSG5|A0A1B0GSG5_MOUSE	32.68	2	0	2	0		1	1	0	1		53926	Ribonuclease inhibitor OS=Mus musculus OX=10090 GN=Rnh1 PE=1 SV=1
726	1509	tr|G3UYQ4|G3UYQ4_MOUSE	32.57	0	0	0	1350000	1380000	1	1	1	1		219532	Adenylate kinase 9 OS=Mus musculus OX=10090 GN=Ak9 PE=1 SV=2
961	2242	Q05816|FABP5_MOUSE	32.53	7	7	7	689000	724000	1	1	1	1		15137	Fatty acid-binding protein 5 OS=Mus musculus OX=10090 GN=Fabp5 PE=1 SV=3
964	2277	Q9CQZ5|NDUA6_MOUSE	32.2	6	6	6	3610000	3670000	1	1	1	1		15283	NADH dehydrogenase [ubiquinone] 1 alpha subcomplex subunit 6 OS=Mus musculus OX=10090 GN=Ndufa6 PE=1 SV=1
963	2248	P50114|S100B_MOUSE	32.04	16	16	16	0	270000	1	1	1	1		10728	Protein S100-B OS=Mus musculus OX=10090 GN=S100b PE=1 SV=2
965	2284	tr|A2AP32|A2AP32_MOUSE	31.97	7	7	7	953000	1360000	1	1	1	1		11742	NADH dehydrogenase [ubiquinone] 1 beta subcomplex subunit 6 OS=Mus musculus OX=10090 GN=Ndufb6 PE=1 SV=1
965	2286	Q3UIU2|NDUB6_MOUSE	31.97	5	5	5	953000	1360000	1	1	1	1		15515	NADH dehydrogenase [ubiquinone] 1 beta subcomplex subunit 6 OS=Mus musculus OX=10090 GN=Ndufb6 PE=1 SV=3
415	1385	P26043|RADI_MOUSE	31.69	2	0	2	662000		1	1	0	1		68543	Radixin OS=Mus musculus OX=10090 GN=Rdx PE=1 SV=3
966	2287	tr|Q792Z1|Q792Z1_MOUSE	31.5	11	0	11	0		1	1	0	1	Deamidation N	26221	MCG140784 OS=Mus musculus OX=10090 GN=Try10 PE=1 SV=1
488	1429	tr|F7CJS8|F7CJS8_MOUSE	30.84	7	7	7	1630000	1360000	1	1	1	1		16206	40S ribosomal protein S9 (Fragment) OS=Mus musculus OX=10090 GN=Rps9 PE=1 SV=1
488	1430	tr|D3YWH9|D3YWH9_MOUSE	30.84	7	7	7	1630000	1360000	1	1	1	1		16287	40S ribosomal protein S9 OS=Mus musculus OX=10090 GN=Rps9 PE=1 SV=1
488	1431	tr|Q9CXW7|Q9CXW7_MOUSE	30.84	6	6	6	1630000	1360000	1	1	1	1		16605	40S ribosomal protein S9 OS=Mus musculus OX=10090 GN=Rps9 PE=1 SV=1
488	1432	Q6ZWN5|RS9_MOUSE	30.84	5	5	5	1630000	1360000	1	1	1	1		22591	40S ribosomal protein S9 OS=Mus musculus OX=10090 GN=Rps9 PE=1 SV=3
1445	2306	Q8VED9|LEGL_MOUSE	30.64	5	0	5	0		1	1	0	1	Carbamidomethylation	18956	Galectin-related protein OS=Mus musculus OX=10090 GN=Lgalsl PE=1 SV=1
972	2379	tr|D3Z2Y8|D3Z2Y8_MOUSE	30.42	3	3	3	2100000	2250000	1	1	1	1		29147	D-beta-hydroxybutyrate dehydrogenase mitochondrial (Fragment) OS=Mus musculus OX=10090 GN=Bdh1 PE=1 SV=1
972	2409	Q80XN0|BDH_MOUSE	30.42	2	2	2	2100000	2250000	1	1	1	1		38299	D-beta-hydroxybutyrate dehydrogenase mitochondrial OS=Mus musculus OX=10090 GN=Bdh1 PE=1 SV=2
972	2428	tr|A0A1D5RLY2|A0A1D5RLY2_MOUSE	30.42	2	2	2	2100000	2250000	1	1	1	1		51484	Protein VAC14 homolog OS=Mus musculus OX=10090 GN=Vac14 PE=1 SV=1
972	2491	Q80WQ2|VAC14_MOUSE	30.42	1	1	1	2100000	2250000	1	1	1	1		88048	Protein VAC14 homolog OS=Mus musculus OX=10090 GN=Vac14 PE=1 SV=1
713	1435	P24472|GSTA4_MOUSE	30.31	3	3	3	2260000	1910000	1	1	1	1		25564	Glutathione S-transferase A4 OS=Mus musculus OX=10090 GN=Gsta4 PE=1 SV=3
583	1382	Q80TB8|VAT1L_MOUSE	30.2	2	2	2	1740000	1730000	1	1	1	1		45817	Synaptic vesicle membrane protein VAT-1 homolog-like OS=Mus musculus OX=10090 GN=Vat1l PE=1 SV=2
975	2416	Q8CDN6|TXNL1_MOUSE	30.12	2	2	2	667000	673000	1	1	1	1		32237	Thioredoxin-like protein 1 OS=Mus musculus OX=10090 GN=Txnl1 PE=1 SV=3
1446	2326	tr|A2AMW0|A2AMW0_MOUSE	30.1	3	3	0		2210000	1	1	1	0		29295	F-actin-capping protein subunit beta OS=Mus musculus OX=10090 GN=Capzb PE=1 SV=1
602	2375	P17809|GTR1_MOUSE	29.97	2	2	2	364000	378000	1	1	2	2		53985	Solute carrier family 2 facilitated glucose transporter member 1 OS=Mus musculus OX=10090 GN=Slc2a1 PE=1 SV=4
967	2330	P20060|HEXB_MOUSE	29.87	2	2	2	144000	205000	1	1	1	1		61116	Beta-hexosaminidase subunit beta OS=Mus musculus OX=10090 GN=Hexb PE=1 SV=2
581	1377	P09103|PDIA1_MOUSE	29.83	2	2	2	447000	349000	1	1	1	1		57059	Protein disulfide-isomerase OS=Mus musculus OX=10090 GN=P4hb PE=1 SV=2
859	1415	tr|E9PWA9|E9PWA9_MOUSE	29.64	1	1	0		233000	1	1	1	0		86514	Probable ubiquitin carboxyl-terminal hydrolase FAF-X (Fragment) OS=Mus musculus OX=10090 GN=Usp9x PE=1 SV=8
859	1417	tr|Q4FE56|Q4FE56_MOUSE	29.64	0	0	0		233000	1	1	1	0		290214	Probable ubiquitin carboxyl-terminal hydrolase FAF-X OS=Mus musculus OX=10090 GN=Usp9x PE=1 SV=1
859	1418	tr|F8VPU6|F8VPU6_MOUSE	29.64	0	0	0		233000	1	1	1	0		292266	Ubiquitin-specific peptidase 9 Y chromosome OS=Mus musculus OX=10090 GN=Usp9y PE=1 SV=1
859	1419	P70398|USP9X_MOUSE	29.64	0	0	0		233000	1	1	1	0		290709	Probable ubiquitin carboxyl-terminal hydrolase FAF-X OS=Mus musculus OX=10090 GN=Usp9x PE=1 SV=2
1447	2350	tr|A0A338P764|A0A338P764_MOUSE	29.6	5	5	0		510000	1	1	1	0		19259	Fibroblast growth factor (Fragment) OS=Mus musculus OX=10090 GN=Fgf12 PE=1 SV=1
1447	2353	P61329|FGF12_MOUSE	29.6	3	3	0		510000	1	1	1	0		27399	Fibroblast growth factor 12 OS=Mus musculus OX=10090 GN=Fgf12 PE=1 SV=1
1447	2355	tr|A0A0R4J063|A0A0R4J063_MOUSE	29.6	3	3	0		510000	1	1	1	0		27720	Fibroblast growth factor OS=Mus musculus OX=10090 GN=Fgf14 PE=3 SV=1
1447	2354	P70379|FGF14_MOUSE	29.6	3	3	0		510000	1	1	1	0		27764	Fibroblast growth factor 14 OS=Mus musculus OX=10090 GN=Fgf14 PE=2 SV=1
1447	2357	tr|O89096|O89096_MOUSE	29.6	3	3	0		510000	1	1	1	0		28364	Fibroblast growth factor OS=Mus musculus OX=10090 GN=Fgf14 PE=2 SV=1
968	2333	tr|H3BKL2|H3BKL2_MOUSE	29.57	7	7	7	14000000	12400000	1	1	1	1		13486	Mitochondrial Rho GTPase 2 (Fragment) OS=Mus musculus OX=10090 GN=Rhot2 PE=1 SV=1
968	2334	tr|H3BL14|H3BL14_MOUSE	29.57	5	5	5	14000000	12400000	1	1	1	1		19095	Mitochondrial Rho GTPase 2 (Fragment) OS=Mus musculus OX=10090 GN=Rhot2 PE=1 SV=1
968	2337	P55041|GEM_MOUSE	29.57	3	3	3	14000000	12400000	1	1	1	1		33725	GTP-binding protein GEM OS=Mus musculus OX=10090 GN=Gem PE=1 SV=2
968	2342	Q8JZN7|MIRO2_MOUSE	29.57	1	1	1	14000000	12400000	1	1	1	1		69071	Mitochondrial Rho GTPase 2 OS=Mus musculus OX=10090 GN=Rhot2 PE=1 SV=1
968	2343	Q8BG51|MIRO1_MOUSE	29.57	1	1	1	14000000	12400000	1	1	1	1		72242	Mitochondrial Rho GTPase 1 OS=Mus musculus OX=10090 GN=Rhot1 PE=1 SV=1
971	2378	tr|Q80XR6|Q80XR6_MOUSE	29.31	3	3	3	151000	156000	1	1	1	1		33816	Heterogeneous nuclear ribonucleoprotein A/B OS=Mus musculus OX=10090 GN=Hnrnpab PE=1 SV=1
971	2381	tr|Q20BD0|Q20BD0_MOUSE	29.31	2	2	2	151000	156000	1	1	1	1		36211	Heterogeneous nuclear ribonucleoprotein A/B OS=Mus musculus OX=10090 GN=Hnrnpab PE=1 SV=1
970	2376	tr|Q3TG45|Q3TG45_MOUSE	29.18	3	3	3	360000	421000	1	1	1	1		28526	26S proteasome non-ATPase regulatory subunit 8 OS=Mus musculus OX=10090 GN=Psmd8 PE=1 SV=1
970	2380	tr|Q9CPS5|Q9CPS5_MOUSE	29.18	3	3	3	360000	421000	1	1	1	1		32769	26S proteasome non-ATPase regulatory subunit 8 OS=Mus musculus OX=10090 GN=Psmd8 PE=1 SV=2
970	2391	Q9CX56|PSMD8_MOUSE	29.18	2	2	2	360000	421000	1	1	1	1		39930	26S proteasome non-ATPase regulatory subunit 8 OS=Mus musculus OX=10090 GN=Psmd8 PE=1 SV=2
969	2364	tr|E9Q7Y2|E9Q7Y2_MOUSE	28.98	2	2	2	1000000	843000	1	1	1	1		41021	Long-chain-fatty-acid--CoA ligase 6 (Fragment) OS=Mus musculus OX=10090 GN=Acsl6 PE=1 SV=1
969	2366	tr|Q8BYJ0|Q8BYJ0_MOUSE	28.98	2	2	2	1000000	843000	1	1	1	1		47723	Long-chain-fatty-acid--CoA ligase 6 OS=Mus musculus OX=10090 GN=Acsl6 PE=1 SV=1
969	2371	Q91WC3|ACSL6_MOUSE	28.98	1	1	1	1000000	843000	1	1	1	1		78017	Long-chain-fatty-acid--CoA ligase 6 OS=Mus musculus OX=10090 GN=Acsl6 PE=1 SV=1
969	2370	tr|Q5ICG5|Q5ICG5_MOUSE	28.98	1	1	1	1000000	843000	1	1	1	1		77970	Long chain acyl-CoA synthetase 6 isoform 3 OS=Mus musculus OX=10090 GN=Acsl6 PE=1 SV=1
969	2372	tr|Q8R1X1|Q8R1X1_MOUSE	28.98	1	1	1	1000000	843000	1	1	1	1		80738	Acyl-CoA synthetase long-chain family member 6 OS=Mus musculus OX=10090 GN=Acsl6 PE=1 SV=2
1448	2377	Q60749|KHDR1_MOUSE	28.71	2	2	0		438000	1	1	1	0		48371	KH domain-containing RNA-binding signal transduction-associated protein 1 OS=Mus musculus OX=10090 GN=Khdrbs1 PE=1 SV=2
870	1510	Q925I1|ATAD3_MOUSE	28.7	1	1	0		212000	1	1	1	0		66742	ATPase family AAA domain-containing protein 3 OS=Mus musculus OX=10090 GN=Atad3 PE=1 SV=1
1449	2413	P16390|KCNA3_MOUSE	28.67	3	0	3	250000		1	1	0	1		58564	Potassium voltage-gated channel subfamily A member 3 OS=Mus musculus OX=10090 GN=Kcna3 PE=1 SV=3
974	2411	tr|A0A087WQA8|A0A087WQA8_MOUSE	28.5	4	4	4	325000	346000	1	1	1	1		23416	COP9 signalosome complex subunit 5 (Fragment) OS=Mus musculus OX=10090 GN=Cops5 PE=1 SV=1
974	2415	O35864|CSN5_MOUSE	28.5	2	2	2	325000	346000	1	1	1	1		37549	COP9 signalosome complex subunit 5 OS=Mus musculus OX=10090 GN=Cops5 PE=1 SV=3
584	1383	tr|A0A0N4SV00|A0A0N4SV00_MOUSE	28.27	1	1	1	1430000	1180000	1	1	1	1	Carbamidomethylation	55058	T-complex protein 1 subunit eta OS=Mus musculus OX=10090 GN=Cct7 PE=1 SV=1
584	1384	P80313|TCPH_MOUSE	28.27	1	1	1	1430000	1180000	1	1	1	1	Carbamidomethylation	59652	T-complex protein 1 subunit eta OS=Mus musculus OX=10090 GN=Cct7 PE=1 SV=1
976	2438	tr|E9Q006|E9Q006_MOUSE	28.24	21	21	21	355000	294000	1	1	1	1		5627	ADP-ribosylation factor-like protein 1 (Fragment) OS=Mus musculus OX=10090 GN=Arl1 PE=1 SV=1
976	2439	tr|F8WIB1|F8WIB1_MOUSE	28.24	8	8	8	355000	294000	1	1	1	1		15650	ADP-ribosylation factor-like protein 1 (Fragment) OS=Mus musculus OX=10090 GN=Arl1 PE=1 SV=1
976	2440	P61211|ARL1_MOUSE	28.24	6	6	6	355000	294000	1	1	1	1		20412	ADP-ribosylation factor-like protein 1 OS=Mus musculus OX=10090 GN=Arl1 PE=1 SV=1
1450	2446	P57746|VATD_MOUSE	28.19	5	5	0		0	1	1	1	0		28369	V-type proton ATPase subunit D OS=Mus musculus OX=10090 GN=Atp6v1d PE=1 SV=1
979	2448	tr|D3Z041|D3Z041_MOUSE	28.13	2	2	0		131000	1	1	1	0		78035	Long-chain-fatty-acid--CoA ligase 1 OS=Mus musculus OX=10090 GN=Acsl1 PE=1 SV=1
979	2447	P41216|ACSL1_MOUSE	28.13	2	2	0		131000	1	1	1	0		77952	Long-chain-fatty-acid--CoA ligase 1 OS=Mus musculus OX=10090 GN=Acsl1 PE=1 SV=2
1452	2458	P61358|RL27_MOUSE	27.86	6	6	0		880000	1	1	1	0		15798	60S ribosomal protein L27 OS=Mus musculus OX=10090 GN=Rpl27 PE=1 SV=2
978	2445	Q9CXV1|DHSD_MOUSE	27.7	6	0	6	0		1	1	0	1		17014	Succinate dehydrogenase [ubiquinone] cytochrome b small subunit mitochondrial OS=Mus musculus OX=10090 GN=Sdhd PE=1 SV=2
1453	2494	Q60625|ICAM5_MOUSE	27.37	1	0	1	1140000		1	1	0	1	Carbamidomethylation	96946	Intercellular adhesion molecule 5 OS=Mus musculus OX=10090 GN=Icam5 PE=1 SV=2
1456	2525	P19001|K1C19_MOUSE	27.2	2	2	0		12200000	1	1	1	0		44542	Keratin type I cytoskeletal 19 OS=Mus musculus OX=10090 GN=Krt19 PE=1 SV=1
1456	2527	P05784|K1C18_MOUSE	27.2	2	2	0		12200000	1	1	1	0		47538	Keratin type I cytoskeletal 18 OS=Mus musculus OX=10090 GN=Krt18 PE=1 SV=5
1456	2528	Q9QWL7|K1C17_MOUSE	27.2	2	2	0		12200000	1	1	1	0		48162	Keratin type I cytoskeletal 17 OS=Mus musculus OX=10090 GN=Krt17 PE=1 SV=3
1456	2529	P08730|K1C13_MOUSE	27.2	2	2	0		12200000	1	1	1	0		47754	Keratin type I cytoskeletal 13 OS=Mus musculus OX=10090 GN=Krt13 PE=1 SV=2
1456	2531	Q61414|K1C15_MOUSE	27.2	2	2	0		12200000	1	1	1	0		49138	Keratin type I cytoskeletal 15 OS=Mus musculus OX=10090 GN=Krt15 PE=1 SV=2
1456	2532	tr|B1AQ77|B1AQ77_MOUSE	27.2	2	2	0		12200000	1	1	1	0		49494	Keratin 15 isoform CRA_a OS=Mus musculus OX=10090 GN=Krt15 PE=1 SV=1
1451	2455	O35326|SRSF5_MOUSE	27.07	3	0	3	516000		1	1	0	1		30891	Serine/arginine-rich splicing factor 5 OS=Mus musculus OX=10090 GN=Srsf5 PE=1 SV=2
1451	2456	tr|Q9D8S5|Q9D8S5_MOUSE	27.07	3	0	3	516000		1	1	0	1		30978	MCG7614 isoform CRA_c OS=Mus musculus OX=10090 GN=Srsf5 PE=1 SV=1
1451	2457	Q3TWW8|SRSF6_MOUSE	27.07	3	0	3	516000		1	1	0	1		39025	Serine/arginine-rich splicing factor 6 OS=Mus musculus OX=10090 GN=Srsf6 PE=1 SV=1
1451	2460	Q8VE97|SRSF4_MOUSE	27.07	2	0	2	516000		1	1	0	1		55979	Serine/arginine-rich splicing factor 4 OS=Mus musculus OX=10090 GN=Srsf4 PE=2 SV=1
1451	2461	tr|Q542V3|Q542V3_MOUSE	27.07	2	0	2	516000		1	1	0	1		56249	Serine/arginine-rich-splicing factor 4 OS=Mus musculus OX=10090 GN=Srsf4 PE=1 SV=1
1454	2515	tr|D3YUG6|D3YUG6_MOUSE	26.82	5	5	0		0	1	1	1	0		19154	Coronin (Fragment) OS=Mus musculus OX=10090 GN=Coro1b PE=1 SV=1
1454	2526	Q9WUM3|COR1B_MOUSE	26.82	2	2	0		0	1	1	1	0		53912	Coronin-1B OS=Mus musculus OX=10090 GN=Coro1b PE=1 SV=1
1455	2520	tr|D3Z0E6|D3Z0E6_MOUSE	26.81	3	3	0		996000	1	1	1	0		27396	3'(2') 5'-bisphosphate nucleotidase 1 OS=Mus musculus OX=10090 GN=Bpnt1 PE=1 SV=1
1455	2522	Q9Z0S1|BPNT1_MOUSE	26.81	3	3	0		996000	1	1	1	0		33196	3'(2') 5'-bisphosphate nucleotidase 1 OS=Mus musculus OX=10090 GN=Bpnt1 PE=1 SV=2
1455	2523	tr|A0A1B0GRV0|A0A1B0GRV0_MOUSE	26.81	2	2	0		996000	1	1	1	0		34974	3'(2') 5'-bisphosphate nucleotidase 1 OS=Mus musculus OX=10090 GN=Bpnt1 PE=1 SV=1
981	2485	Q9D819|IPYR_MOUSE	26.7	3	3	3	5420000	5060000	1	1	1	1		32667	Inorganic pyrophosphatase OS=Mus musculus OX=10090 GN=Ppa1 PE=1 SV=1
737	2185	tr|C7IVS7|C7IVS7_MOUSE	26.4	1	1	1	184000	183000	1	1	1	1		68061	Calcium channel voltage-dependent beta 2 subunit OS=Mus musculus OX=10090 GN=Cacnb2 PE=1 SV=1
737	2218	Q8CC27|CACB2_MOUSE	26.4	1	1	1	184000	183000	1	1	1	1		73149	Voltage-dependent L-type calcium channel subunit beta-2 OS=Mus musculus OX=10090 GN=Cacnb2 PE=1 SV=1
982	2496	tr|F6RBR6|F6RBR6_MOUSE	26.37	14	0	14	3100000		1	1	0	1		9882	NADH dehydrogenase [ubiquinone] 1 alpha subcomplex subunit 12 OS=Mus musculus OX=10090 GN=Ndufa12 PE=1 SV=2
982	2497	Q7TMF3|NDUAC_MOUSE	26.37	8	0	8	3100000		1	1	0	1		17086	NADH dehydrogenase [ubiquinone] 1 alpha subcomplex subunit 12 OS=Mus musculus OX=10090 GN=Ndufa12 PE=1 SV=2
982	2498	tr|A0A0R4J275|A0A0R4J275_MOUSE	26.37	8	0	8	3100000		1	1	0	1		17633	NADH dehydrogenase [ubiquinone] 1 alpha subcomplex subunit 12 OS=Mus musculus OX=10090 GN=Ndufa12 PE=1 SV=1
984	2518	Q91VR7|MLP3A_MOUSE	26.15	6	6	6	3470000	2930000	1	1	1	1		14272	Microtubule-associated proteins 1A/1B light chain 3A OS=Mus musculus OX=10090 GN=Map1lc3a PE=1 SV=1
984	2519	Q9CQV6|MLP3B_MOUSE	26.15	6	6	6	3470000	2930000	1	1	1	1		14617	Microtubule-associated proteins 1A/1B light chain 3B OS=Mus musculus OX=10090 GN=Map1lc3b PE=1 SV=3
984	2524	tr|M0QWC2|M0QWC2_MOUSE	26.15	4	4	4	3470000	2930000	1	1	1	1		18176	MCG14171 isoform CRA_b OS=Mus musculus OX=10090 GN=Map1lc3b PE=1 SV=1
983	2513	P35235|PTN11_MOUSE	26.02	2	2	2	2200000	1050000	1	1	1	1		68460	Tyrosine-protein phosphatase non-receptor type 11 OS=Mus musculus OX=10090 GN=Ptpn11 PE=1 SV=2
985	2551	P61222|ABCE1_MOUSE	25.92	2	2	2	87300	56200	1	1	1	1		67314	ATP-binding cassette sub-family E member 1 OS=Mus musculus OX=10090 GN=Abce1 PE=1 SV=1
709	1390	Q8BMF3|MAON_MOUSE	25.29	1	1	1	10700000	9450000	1	1	1	1		67098	NADP-dependent malic enzyme mitochondrial OS=Mus musculus OX=10090 GN=Me3 PE=1 SV=2
738	2202	tr|E9QAN4|E9QAN4_MOUSE	25.29	1	1	1	23800000	24400000	1	1	1	1		190975	Kinesin-like protein KIF1A OS=Mus musculus OX=10090 GN=Kif1a PE=1 SV=1
738	2203	P33173|KIF1A_MOUSE	25.29	1	1	1	23800000	24400000	1	1	1	1		191724	Kinesin-like protein KIF1A OS=Mus musculus OX=10090 GN=Kif1a PE=1 SV=2
738	2204	tr|G3UW47|G3UW47_MOUSE	25.29	1	1	1	23800000	24400000	1	1	1	1		191852	Kinesin family member 1A OS=Mus musculus OX=10090 GN=Kif1a PE=1 SV=1
738	2206	tr|E9Q9G6|E9Q9G6_MOUSE	25.29	1	1	1	23800000	24400000	1	1	1	1		192047	Kinesin-like protein KIF1A OS=Mus musculus OX=10090 GN=Kif1a PE=1 SV=1
738	2205	tr|Q6TA13|Q6TA13_MOUSE	25.29	1	1	1	23800000	24400000	1	1	1	1		191809	Kinesin-like protein KIF1A OS=Mus musculus OX=10090 GN=Kif1a PE=1 SV=1
738	2211	tr|A0A087WQE8|A0A087WQE8_MOUSE	25.29	1	1	1	23800000	24400000	1	1	1	1		202173	Kinesin-like protein KIF1A OS=Mus musculus OX=10090 GN=Kif1a PE=1 SV=1
1457	2540	O08529|CAN2_MOUSE	25.18	2	0	2	150000		1	1	0	1		79872	Calpain-2 catalytic subunit OS=Mus musculus OX=10090 GN=Capn2 PE=1 SV=4
420	2578	tr|E9PUK9|E9PUK9_MOUSE	25.07	2	2	2	13100000	13100000	1	1	1	1		44766	Synaptotagmin-like protein 3 OS=Mus musculus OX=10090 GN=Sytl3 PE=1 SV=1
420	2582	Q99N48|SYTL3_MOUSE	25.07	1	1	1	13100000	13100000	1	1	1	1		68568	Synaptotagmin-like protein 3 OS=Mus musculus OX=10090 GN=Sytl3 PE=1 SV=2
988	2579	Q91YS8|KCC1A_MOUSE	25.06	2	2	2	608000	628000	1	1	1	1		41624	Calcium/calmodulin-dependent protein kinase type 1 OS=Mus musculus OX=10090 GN=Camk1 PE=1 SV=1
988	2580	Q8BW96|KCC1D_MOUSE	25.06	2	2	2	608000	628000	1	1	1	1		42919	Calcium/calmodulin-dependent protein kinase type 1D OS=Mus musculus OX=10090 GN=Camk1d PE=1 SV=2
991	2612	P47708|RP3A_MOUSE	25	1	1	1	722000	671000	1	1	1	1		75489	Rabphilin-3A OS=Mus musculus OX=10090 GN=Rph3a PE=1 SV=2
987	2575	tr|D3YYD5|D3YYD5_MOUSE	24.88	6	6	0		1130000	1	1	1	0		13723	Vacuolar protein sorting-associated protein 29 (Fragment) OS=Mus musculus OX=10090 GN=Vps29 PE=1 SV=1
987	2576	tr|D3Z645|D3Z645_MOUSE	24.88	6	6	0		1130000	1	1	1	0		16138	Vacuolar protein sorting-associated protein 29 OS=Mus musculus OX=10090 GN=Vps29 PE=1 SV=1
987	2577	Q9QZ88|VPS29_MOUSE	24.88	4	4	0		1130000	1	1	1	0		20496	Vacuolar protein sorting-associated protein 29 OS=Mus musculus OX=10090 GN=Vps29 PE=1 SV=1
871	1518	P62627|DLRB1_MOUSE	24.87	12	0	12	304000		1	1	0	1		10990	Dynein light chain roadblock-type 1 OS=Mus musculus OX=10090 GN=Dynlrb1 PE=1 SV=3
871	1519	tr|A2AVR9|A2AVR9_MOUSE	24.87	12	0	12	304000		1	1	0	1		11928	Dynein light chain roadblock OS=Mus musculus OX=10090 GN=Dynlrb1 PE=1 SV=1
1459	2550	Q922B2|SYDC_MOUSE	24.85	2	0	2	452000		1	1	0	1	Carbamidomethylation	57147	Aspartate--tRNA ligase cytoplasmic OS=Mus musculus OX=10090 GN=Dars PE=1 SV=2
986	2559	tr|D3Z7C6|D3Z7C6_MOUSE	24.75	5	5	5	2500000	2340000	1	1	1	1	Carbamidomethylation	14983	Prostaglandin E synthase 3 OS=Mus musculus OX=10090 GN=Ptges3 PE=1 SV=1
986	2568	Q9R0Q7|TEBP_MOUSE	24.75	4	4	4	2500000	2340000	1	1	1	1	Carbamidomethylation	18721	Prostaglandin E synthase 3 OS=Mus musculus OX=10090 GN=Ptges3 PE=1 SV=1
986	2569	tr|A0A0J9YU30|A0A0J9YU30_MOUSE	24.75	4	4	4	2500000	2340000	1	1	1	1	Carbamidomethylation	20442	Regulator of G-protein-signaling 12 (Fragment) OS=Mus musculus OX=10090 GN=Rgs12 PE=1 SV=2
990	2608	tr|A0A0A6YVZ8|A0A0A6YVZ8_MOUSE	24.52	2	2	2	9260000	9210000	1	1	1	1		46799	Mitogen-activated protein kinase kinase kinase kinase 4 (Fragment) OS=Mus musculus OX=10090 GN=Map4k4 PE=1 SV=1
990	2631	tr|F7AMS7|F7AMS7_MOUSE	24.52	1	1	1	9260000	9210000	1	1	1	1		135060	Misshapen-like kinase 1 (Fragment) OS=Mus musculus OX=10090 GN=Mink1 PE=1 SV=1
990	2633	tr|B7ZNR9|B7ZNR9_MOUSE	24.52	1	1	1	9260000	9210000	1	1	1	1		137903	Map4k4 protein OS=Mus musculus OX=10090 GN=Map4k4 PE=1 SV=1
990	2637	tr|B2RUE8|B2RUE8_MOUSE	24.52	1	1	1	9260000	9210000	1	1	1	1		139065	Map4k4 protein OS=Mus musculus OX=10090 GN=Map4k4 PE=1 SV=1
990	2638	tr|A0A0A6YWR8|A0A0A6YWR8_MOUSE	24.52	1	1	1	9260000	9210000	1	1	1	1		140807	Mitogen-activated protein kinase kinase kinase kinase 4 OS=Mus musculus OX=10090 GN=Map4k4 PE=1 SV=1
990	2639	tr|F8VPL5|F8VPL5_MOUSE	24.52	1	1	1	9260000	9210000	1	1	1	1		141784	Mitogen-activated protein kinase kinase kinase kinase 4 OS=Mus musculus OX=10090 GN=Map4k4 PE=1 SV=2
990	2642	tr|E0CZF8|E0CZF8_MOUSE	24.52	1	1	1	9260000	9210000	1	1	1	1		144253	Traf2 and NCK-interacting protein kinase OS=Mus musculus OX=10090 GN=Tnik PE=1 SV=1
990	2643	tr|A0A0A6YWM8|A0A0A6YWM8_MOUSE	24.52	1	1	1	9260000	9210000	1	1	1	1		144688	Mitogen-activated protein kinase kinase kinase kinase 4 OS=Mus musculus OX=10090 GN=Map4k4 PE=1 SV=1
990	2644	tr|E0CZD7|E0CZD7_MOUSE	24.52	1	1	1	9260000	9210000	1	1	1	1		145188	Traf2 and NCK-interacting protein kinase OS=Mus musculus OX=10090 GN=Tnik PE=1 SV=1
990	2646	tr|A0A0A6YW53|A0A0A6YW53_MOUSE	24.52	1	1	1	9260000	9210000	1	1	1	1		146715	Mitogen-activated protein kinase kinase kinase kinase 4 OS=Mus musculus OX=10090 GN=Map4k4 PE=1 SV=1
990	2645	tr|E9PVG7|E9PVG7_MOUSE	24.52	1	1	1	9260000	9210000	1	1	1	1		146717	Mitogen-activated protein kinase kinase kinase kinase 4 OS=Mus musculus OX=10090 GN=Map4k4 PE=1 SV=2
990	2647	tr|E0CXD6|E0CXD6_MOUSE	24.52	1	1	1	9260000	9210000	1	1	1	1		147896	Traf2 and NCK-interacting protein kinase OS=Mus musculus OX=10090 GN=Tnik PE=1 SV=1
990	2649	tr|E0CY98|E0CY98_MOUSE	24.52	1	1	1	9260000	9210000	1	1	1	1		148831	Traf2 and NCK-interacting protein kinase OS=Mus musculus OX=10090 GN=Tnik PE=1 SV=1
990	2650	Q9JM52|MINK1_MOUSE	24.52	1	1	1	9260000	9210000	1	1	1	1		147294	Misshapen-like kinase 1 OS=Mus musculus OX=10090 GN=Mink1 PE=1 SV=3
990	2651	P83510|TNIK_MOUSE	24.52	1	1	1	9260000	9210000	1	1	1	1		150366	Traf2 and NCK-interacting protein kinase OS=Mus musculus OX=10090 GN=Tnik PE=1 SV=2
990	2652	tr|E9PUL9|E9PUL9_MOUSE	24.52	1	1	1	9260000	9210000	1	1	1	1		151301	Traf2 and NCK-interacting protein kinase OS=Mus musculus OX=10090 GN=Tnik PE=1 SV=1
990	2653	tr|Q5SXG1|Q5SXG1_MOUSE	24.52	1	1	1	9260000	9210000	1	1	1	1		150090	Misshapen-like kinase 1 OS=Mus musculus OX=10090 GN=Mink1 PE=1 SV=1
990	2654	tr|Q5SXG3|Q5SXG3_MOUSE	24.52	1	1	1	9260000	9210000	1	1	1	1		150405	Misshapen-like kinase 1 OS=Mus musculus OX=10090 GN=Mink1 PE=1 SV=1
990	2655	tr|G3X9G2|G3X9G2_MOUSE	24.52	1	1	1	9260000	9210000	1	1	1	1		151223	Misshapen-like kinase 1 OS=Mus musculus OX=10090 GN=Mink1 PE=1 SV=1
990	2656	tr|B9EKN8|B9EKN8_MOUSE	24.52	1	1	1	9260000	9210000	1	1	1	1		154010	TRAF2 and NCK interacting kinase OS=Mus musculus OX=10090 GN=Tnik PE=1 SV=1
990	2657	tr|B2RQ80|B2RQ80_MOUSE	24.52	1	1	1	9260000	9210000	1	1	1	1		154945	Tnik protein OS=Mus musculus OX=10090 GN=Tnik PE=1 SV=1
989	2588	tr|D3YYK8|D3YYK8_MOUSE	24.39	7	0	7	128000		1	1	0	1		29425	Microtubule-associated protein RP/EB family member 2 (Fragment) OS=Mus musculus OX=10090 GN=Mapre2 PE=1 SV=1
989	2589	tr|E9Q6X0|E9Q6X0_MOUSE	24.39	6	0	6	128000		1	1	0	1		32265	Microtubule-associated protein RP/EB family member 2 OS=Mus musculus OX=10090 GN=Mapre2 PE=1 SV=1
989	2590	Q8R001|MARE2_MOUSE	24.39	6	0	6	128000		1	1	0	1		36946	Microtubule-associated protein RP/EB family member 2 OS=Mus musculus OX=10090 GN=Mapre2 PE=1 SV=1
743	2596	tr|A3KGI3|A3KGI3_MOUSE	24.37	0	0	0	0	0	1	1	1	1		238183	Kinetochore scaffold 1 OS=Mus musculus OX=10090 GN=Knl1 PE=1 SV=1
1461	2625	tr|F6Q2Y9|F6Q2Y9_MOUSE	24.3	1	1	0		481000	1	1	1	0		77386	Protein transport protein sec16 (Fragment) OS=Mus musculus OX=10090 GN=Sec16b PE=1 SV=2
1461	2640	Q91XT4|SC16B_MOUSE	24.3	1	1	0		481000	1	1	1	0		115513	Protein transport protein Sec16B OS=Mus musculus OX=10090 GN=Sec16b PE=1 SV=3
1461	2660	Q6PB66|LPPRC_MOUSE	24.3	1	1	0		481000	1	1	1	0		156614	Leucine-rich PPR motif-containing protein mitochondrial OS=Mus musculus OX=10090 GN=Lrpprc PE=1 SV=2
1460	2615	Q3UHJ0|AAK1_MOUSE	23.93	1	1	0		231000	1	1	1	0		103346	AP2-associated protein kinase 1 OS=Mus musculus OX=10090 GN=Aak1 PE=1 SV=2
997	2664	P63216|GBG3_MOUSE	23.76	9	9	9	5970000	6370000	1	1	1	1	Carbamidomethylation	8305	Guanine nucleotide-binding protein G(I)/G(S)/G(O) subunit gamma-3 OS=Mus musculus OX=10090 GN=Gng3 PE=1 SV=1
996	2662	tr|A2A931|A2A931_MOUSE	23.75	1	0	1	2490000		1	1	0	1		140730	Histone-lysine N-methyltransferase PRDM16 OS=Mus musculus OX=10090 GN=Prdm16 PE=1 SV=1
996	2663	tr|A2A933|A2A933_MOUSE	23.75	1	0	1	2490000		1	1	0	1		140945	Histone-lysine N-methyltransferase PRDM16 OS=Mus musculus OX=10090 GN=Prdm16 PE=1 SV=1
992	2627	Q9JM63|KCJ10_MOUSE	23.71	2	2	2	0	3090000	1	1	1	1		42432	ATP-sensitive inward rectifier potassium channel 10 OS=Mus musculus OX=10090 GN=Kcnj10 PE=1 SV=1
977	2442	tr|A0A0U1RNJ1|A0A0U1RNJ1_MOUSE	23.61	0	0	0	0		1	1	0	1	Deamidation N	272226	Fatty acid synthase OS=Mus musculus OX=10090 GN=Fasn PE=1 SV=1
977	2443	P19096|FAS_MOUSE	23.61	0	0	0	0		1	1	0	1	Deamidation N	272426	Fatty acid synthase OS=Mus musculus OX=10090 GN=Fasn PE=1 SV=2
1462	2629	P40336|VP26A_MOUSE	23.61	2	2	0		108000	1	1	1	0		38114	Vacuolar protein sorting-associated protein 26A OS=Mus musculus OX=10090 GN=Vps26a PE=1 SV=1
1462	2630	Q8C0E2|VP26B_MOUSE	23.61	2	2	0		108000	1	1	1	0		39125	Vacuolar protein sorting-associated protein 26B OS=Mus musculus OX=10090 GN=Vps26b PE=1 SV=1
994	2659	P03921|NU5M_MOUSE	23.53	1	1	1	2140000	1450000	1	1	1	1		68475	NADH-ubiquinone oxidoreductase chain 5 OS=Mus musculus OX=10090 GN=Mtnd5 PE=1 SV=3
744	2619	Q6P8Y7|SNX31_MOUSE	23.46	2	2	2	0	0	1	1	1	1	Carbamidomethylation	50862	Sorting nexin-31 OS=Mus musculus OX=10090 GN=Snx31 PE=1 SV=1
861	1424	P35979|RL12_MOUSE	23.43	5	0	5	1520000		1	1	0	1		17805	60S ribosomal protein L12 OS=Mus musculus OX=10090 GN=Rpl12 PE=1 SV=2
993	2632	tr|A0A1W2P7V9|A0A1W2P7V9_MOUSE	23.2	5	5	0		1990000	1	1	1	0		21260	Dual-specificity mitogen-activated protein kinase kinase 2 (Fragment) OS=Mus musculus OX=10090 GN=Map2k2 PE=1 SV=1
993	2634	P31938|MP2K1_MOUSE	23.2	2	2	0		1990000	1	1	1	0		43474	Dual specificity mitogen-activated protein kinase kinase 1 OS=Mus musculus OX=10090 GN=Map2k1 PE=1 SV=2
993	2635	tr|Q91YS7|Q91YS7_MOUSE	23.2	2	2	0		1990000	1	1	1	0		44303	Dual-specificity mitogen-activated protein kinase kinase 2 OS=Mus musculus OX=10090 GN=Map2k2 PE=1 SV=1
993	2636	Q63932|MP2K2_MOUSE	23.2	2	2	0		1990000	1	1	1	0		44402	Dual specificity mitogen-activated protein kinase kinase 2 OS=Mus musculus OX=10090 GN=Map2k2 PE=1 SV=2
745	2628	tr|E9PY39|E9PY39_MOUSE	22.82	2	2	2	14800000	11700000	1	1	1	1		42096	Predicted gene 20431 OS=Mus musculus OX=10090 GN=Gm20431 PE=4 SV=1
999	2672	tr|A0A1L1SQV7|A0A1L1SQV7_MOUSE	22.73	8	0	8	908000		1	1	0	1		11863	Platelet-activating factor acetylhydrolase IB subunit beta (Fragment) OS=Mus musculus OX=10090 GN=Pafah1b2 PE=1 SV=1
999	2673	tr|A0A1L1SVK0|A0A1L1SVK0_MOUSE	22.73	5	0	5	908000		1	1	0	1		22056	Platelet-activating factor acetylhydrolase IB subunit beta (Fragment) OS=Mus musculus OX=10090 GN=Pafah1b2 PE=1 SV=1
999	2674	Q61206|PA1B2_MOUSE	22.73	4	0	4	908000		1	1	0	1		25581	Platelet-activating factor acetylhydrolase IB subunit beta OS=Mus musculus OX=10090 GN=Pafah1b2 PE=1 SV=2
1464	2678	tr|F6RB63|F6RB63_MOUSE	22.58	9	0	9	854000		1	1	0	1		10353	PC4 and SFRS1-interacting protein (Fragment) OS=Mus musculus OX=10090 GN=Psip1 PE=1 SV=1
1464	2681	Q9JMG7|HDGR3_MOUSE	22.58	4	0	4	854000		1	1	0	1		22431	Hepatoma-derived growth factor-related protein 3 OS=Mus musculus OX=10090 GN=Hdgfl3 PE=1 SV=2
1464	2682	P51859|HDGF_MOUSE	22.58	3	0	3	854000		1	1	0	1		26269	Hepatoma-derived growth factor OS=Mus musculus OX=10090 GN=Hdgf PE=1 SV=2
1464	2684	tr|A2BI12|A2BI12_MOUSE	22.58	2	0	2	854000		1	1	0	1		36968	PC4 and SFRS1-interacting protein OS=Mus musculus OX=10090 GN=Psip1 PE=1 SV=1
1464	2685	Q99JF8|PSIP1_MOUSE	22.58	2	0	2	854000		1	1	0	1		59697	PC4 and SFRS1-interacting protein OS=Mus musculus OX=10090 GN=Psip1 PE=1 SV=1
1464	2686	Q3UMU9|HDGR2_MOUSE	22.58	1	0	1	854000		1	1	0	1		74291	Hepatoma-derived growth factor-related protein 2 OS=Mus musculus OX=10090 GN=Hdgfl2 PE=1 SV=1
527	863	tr|Q9DAY9|Q9DAY9_MOUSE	22.47	4	4	0		1420000	1	1	1	0		28385	Nucleophosmin OS=Mus musculus OX=10090 GN=Npm1 PE=1 SV=1
527	864	tr|Q5SQB0|Q5SQB0_MOUSE	22.47	3	3	0		1420000	1	1	1	0		29525	Nucleophosmin OS=Mus musculus OX=10090 GN=Npm1 PE=1 SV=1
527	865	tr|Q5SQB5|Q5SQB5_MOUSE	22.47	3	3	0		1420000	1	1	1	0		31723	Nucleophosmin OS=Mus musculus OX=10090 GN=Npm1 PE=1 SV=1
527	866	Q61937|NPM_MOUSE	22.47	3	3	0		1420000	1	1	1	0		32560	Nucleophosmin OS=Mus musculus OX=10090 GN=Npm1 PE=1 SV=1
1467	2710	tr|Q9JLL9|Q9JLL9_MOUSE	22.15	2	0	2	212000		1	1	0	1		52164	Phosphodiesterase OS=Mus musculus OX=10090 GN=Pde1a PE=1 SV=1
1467	2711	tr|F6X0V1|F6X0V1_MOUSE	22.15	2	0	2	212000		1	1	0	1		54569	Phosphodiesterase (Fragment) OS=Mus musculus OX=10090 GN=Pde1a PE=1 SV=1
1467	2712	Q61481|PDE1A_MOUSE	22.15	2	0	2	212000		1	1	0	1		64529	Calcium/calmodulin-dependent 3' 5'-cyclic nucleotide phosphodiesterase 1A OS=Mus musculus OX=10090 GN=Pde1a PE=1 SV=2
1465	2689	Q00PI9|HNRL2_MOUSE	21.92	2	2	0		51600	1	1	1	0		84940	Heterogeneous nuclear ribonucleoprotein U-like protein 2 OS=Mus musculus OX=10090 GN=Hnrnpul2 PE=1 SV=2

## Sheet: Lysate-batch02
Protein Group	Protein ID	Accession	-10lgP	Coverage (%)	Coverage (%) Sample 1	Coverage (%) Sample 2	Area Sample 1	Area Sample 2	#Peptides	#Unique	#Spec Sample 1	#Spec Sample 2	PTM	Avg. Mass	Description
13	19	tr|A3KGU7|A3KGU7_MOUSE	260.7	18	14	14	88400000	73100000	41	41	33	34	Carbamidomethylation; Deamidation N	285151	Spectrin alpha chain non-erythrocytic 1 OS=Mus musculus OX=10090 GN=Sptan1 PE=1 SV=1
13	20	tr|A3KGU9|A3KGU9_MOUSE	260.7	18	13	14	88400000	73100000	41	41	33	34	Carbamidomethylation; Deamidation N	287602	Spectrin alpha chain non-erythrocytic 1 OS=Mus musculus OX=10090 GN=Sptan1 PE=1 SV=2
20	12	Q68FD5|CLH1_MOUSE	261.23	20	18	20	285000000	164000000	30	30	34	35	Carbamidomethylation; Deamidation N	191555	Clathrin heavy chain 1 OS=Mus musculus OX=10090 GN=Cltc PE=1 SV=3
20	13	tr|Q5SXR6|Q5SXR6_MOUSE	261.23	20	18	19	285000000	164000000	30	30	34	35	Carbamidomethylation; Deamidation N	191985	Clathrin heavy chain OS=Mus musculus OX=10090 GN=Cltc PE=1 SV=1
18	8	P07724|ALBU_MOUSE	273.34	45	42	42	307000000	637000000	29	29	33	37	Carbamidomethylation; Deamidation N	68693	Serum albumin OS=Mus musculus OX=10090 GN=Alb PE=1 SV=3
7	1	Q6PIC6|AT1A3_MOUSE	326.88	36	31	33	445000000	523000000	38	23	50	54	Carbamidomethylation; Deamidation N; Oxidation (M)	111691	Sodium/potassium-transporting ATPase subunit alpha-3 OS=Mus musculus OX=10090 GN=Atp1a3 PE=1 SV=1
7	2	tr|A0A0G2JGX4|A0A0G2JGX4_MOUSE	326.88	36	30	33	445000000	523000000	38	23	50	54	Carbamidomethylation; Deamidation N; Oxidation (M)	112988	Sodium/potassium-transporting ATPase subunit alpha OS=Mus musculus OX=10090 GN=Atp1a3 PE=1 SV=1
33	6	Q99KI0|ACON_MOUSE	252.14	33	28	30	198000000	257000000	23	23	25	30	Carbamidomethylation; Deamidation N	85464	Aconitate hydratase mitochondrial OS=Mus musculus OX=10090 GN=Aco2 PE=1 SV=1
31	29	Q9QYR6|MAP1A_MOUSE	218.45	9	8	6	27800000	16500000	21	20	20	18	Carbamidomethylation	300139	Microtubule-associated protein 1A OS=Mus musculus OX=10090 GN=Map1a PE=1 SV=2
31	30	tr|A2ARP8|A2ARP8_MOUSE	218.45	8	7	6	27800000	16500000	21	20	20	18	Carbamidomethylation	325886	Microtubule-associated protein 1A OS=Mus musculus OX=10090 GN=Map1a PE=1 SV=1
60	60	Q9JHU4|DYHC1_MOUSE	169.56	4	4	3	10800000	14500000	19	19	17	14	Carbamidomethylation	532050	Cytoplasmic dynein 1 heavy chain 1 OS=Mus musculus OX=10090 GN=Dync1h1 PE=1 SV=2
43	31	P46460|NSF_MOUSE	222.09	27	24	26	105000000	144000000	19	18	21	22	Carbamidomethylation	82613	Vesicle-fusing ATPase OS=Mus musculus OX=10090 GN=Nsf PE=1 SV=2
22	50	P16330|CN37_MOUSE	228.71	37	37	37	325000000	365000000	17	17	33	31	Carbamidomethylation; Deamidation N; HydroxylProline; Ubiquitination-K	47123	2' 3'-cyclic-nucleotide 3'-phosphodiesterase OS=Mus musculus OX=10090 GN=Cnp PE=1 SV=3
38	43	tr|D3Z6F5|D3Z6F5_MOUSE	218.52	33	33	33	400000000	438000000	17	17	23	22	Deamidation N	54595	ATP synthase subunit alpha OS=Mus musculus OX=10090 GN=Atp5a1 PE=1 SV=1
38	45	Q03265|ATPA_MOUSE	218.52	30	30	30	400000000	438000000	17	17	23	22	Deamidation N	59753	ATP synthase subunit alpha mitochondrial OS=Mus musculus OX=10090 GN=Atp5f1a PE=1 SV=1
12	5	Q6PIE5|AT1A2_MOUSE	287.93	30	26	27	109000000	120000000	31	16	42	39	Carbamidomethylation; Deamidation N; Oxidation (M)	112217	Sodium/potassium-transporting ATPase subunit alpha-2 OS=Mus musculus OX=10090 GN=Atp1a2 PE=1 SV=1
26	11	P63017|HSP7C_MOUSE	252.34	34	34	29	205000000	236000000	20	16	33	26	Carbamidomethylation; Deamidation N	70871	Heat shock cognate 71 kDa protein OS=Mus musculus OX=10090 GN=Hspa8 PE=1 SV=1
34	37	O08599|STXB1_MOUSE	219.05	33	28	31	149000000	196000000	16	16	23	25	Carbamidomethylation; Deamidation N; Oxidation (M)	67569	Syntaxin-binding protein 1 OS=Mus musculus OX=10090 GN=Stxbp1 PE=1 SV=2
55	36	P20357|MTAP2_MOUSE	211.44	11	8	10	21700000	35700000	17	16	13	15	Carbamidomethylation; Phosphoserine (pS)	199130	Microtubule-associated protein 2 OS=Mus musculus OX=10090 GN=Map2 PE=1 SV=2
45	39	Q62261|SPTB2_MOUSE	196.47	9	6	7	15700000	11100000	18	15	13	14	Carbamidomethylation	274221	Spectrin beta chain non-erythrocytic 1 OS=Mus musculus OX=10090 GN=Sptbn1 PE=1 SV=2
75	61	Q9DB77|QCR2_MOUSE	212.48	34	24	34	61000000	70700000	14	14	12	15	Carbamidomethylation; Deamidation N	48235	Cytochrome b-c1 complex subunit 2 mitochondrial OS=Mus musculus OX=10090 GN=Uqcrc2 PE=1 SV=1
51	52	P05202|AATM_MOUSE	209.47	35	35	31	196000000	151000000	14	14	18	17	Carbamidomethylation; Deamidation N	47411	Aspartate aminotransferase mitochondrial OS=Mus musculus OX=10090 GN=Got2 PE=1 SV=1
30	18	O08553|DPYL2_MOUSE	244.25	38	38	38	256000000	281000000	18	13	26	31	Carbamidomethylation; Deamidation N	62278	Dihydropyrimidinase-related protein 2 OS=Mus musculus OX=10090 GN=Dpysl2 PE=1 SV=2
28	26	P11499|HS90B_MOUSE	239.88	28	28	22	65100000	54900000	22	13	30	28	Carbamidomethylation; Phosphoserine (pS)	83281	Heat shock protein HSP 90-beta OS=Mus musculus OX=10090 GN=Hsp90ab1 PE=1 SV=3
29	27	P07901|HS90A_MOUSE	232.91	27	23	25	93600000	140000000	21	13	26	31	Deamidation N	84788	Heat shock protein HSP 90-alpha OS=Mus musculus OX=10090 GN=Hsp90aa1 PE=1 SV=4
39	48	P08249|MDHM_MOUSE	217.29	46	46	46	231000000	257000000	13	13	20	24	Carbamidomethylation	35611	Malate dehydrogenase mitochondrial OS=Mus musculus OX=10090 GN=Mdh2 PE=1 SV=3
41	133	Q91XV3|BASP1_MOUSE	213.37	68	68	68	127000000	144000000	13	13	22	22	Deamidation N; HydroxylProline; HexNac; Ubiquitination-K	22087	Brain acid soluble protein 1 OS=Mus musculus OX=10090 GN=Basp1 PE=1 SV=3
65	51	P05201|AATC_MOUSE	208.51	42	34	42	81300000	97600000	13	13	14	14	Deamidation N	46248	Aspartate aminotransferase cytoplasmic OS=Mus musculus OX=10090 GN=Got1 PE=1 SV=3
63	54	tr|G3UVV4|G3UVV4_MOUSE	174.04	16	14	14	179000000	262000000	15	13	17	14	Carbamidomethylation; Deamidation N	101873	Hexokinase 1 isoform CRA_f OS=Mus musculus OX=10090 GN=Hk1 PE=1 SV=1
63	55	P17710|HXK1_MOUSE	174.04	15	14	13	179000000	262000000	15	13	17	14	Carbamidomethylation; Deamidation N	108303	Hexokinase-1 OS=Mus musculus OX=10090 GN=Hk1 PE=1 SV=3
19	7	Q8VDN2|AT1A1_MOUSE	275.22	26	25	24	106000000	114000000	26	12	36	33	Carbamidomethylation; Deamidation N; Oxidation (M)	112982	Sodium/potassium-transporting ATPase subunit alpha-1 OS=Mus musculus OX=10090 GN=Atp1a1 PE=1 SV=1
57	82	P52480|KPYM_MOUSE	212.31	23	23	23	181000000	213000000	12	12	16	17	Carbamidomethylation	57845	Pyruvate kinase PKM OS=Mus musculus OX=10090 GN=Pkm PE=1 SV=4
48	75	P56480|ATPB_MOUSE	211	26	26	21	256000000	247000000	12	12	20	16	Deamidation N	56301	ATP synthase subunit beta mitochondrial OS=Mus musculus OX=10090 GN=Atp5f1b PE=1 SV=2
87	95	P43006|EAA2_MOUSE	193.77	24	18	19	90000000	103000000	12	12	12	13	Carbamidomethylation; Deamidation N	62030	Excitatory amino acid transporter 2 OS=Mus musculus OX=10090 GN=Slc1a2 PE=1 SV=1
53	149	P14094|AT1B1_MOUSE	193.06	29	26	29	299000000	327000000	12	12	18	18	Carbamidomethylation	35195	Sodium/potassium-transporting ATPase subunit beta-1 OS=Mus musculus OX=10090 GN=Atp1b1 PE=1 SV=1
89	78	P62814|VATB2_MOUSE	187.61	24	24	22	71600000	42300000	12	12	10	12	Carbamidomethylation; Deamidation N	56551	V-type proton ATPase subunit B brain isoform OS=Mus musculus OX=10090 GN=Atp6v1b2 PE=1 SV=1
85	62	P63038|CH60_MOUSE	185.15	22	19	20	63700000	98600000	12	12	12	12	Carbamidomethylation; Deamidation N	60956	60 kDa heat shock protein mitochondrial OS=Mus musculus OX=10090 GN=Hspd1 PE=1 SV=1
61	90	Q9CZU6|CISY_MOUSE	183.93	22	22	22	137000000	171000000	12	12	16	17	Carbamidomethylation	51737	Citrate synthase mitochondrial OS=Mus musculus OX=10090 GN=Cs PE=1 SV=1
44	47	P17182|ENOA_MOUSE	214.52	41	34	38	196000000	263000000	15	11	22	23	Carbamidomethylation; Deamidation N	47141	Alpha-enolase OS=Mus musculus OX=10090 GN=Eno1 PE=1 SV=3
49	84	P17751|TPIS_MOUSE	205.43	45	45	45	110000000	144000000	11	11	18	18	Carbamidomethylation; Deamidation N	32192	Triosephosphate isomerase OS=Mus musculus OX=10090 GN=Tpi1 PE=1 SV=4
77	73	P09411|PGK1_MOUSE	201.68	32	26	32	80000000	118000000	11	11	11	14	Carbamidomethylation; Deamidation N	44550	Phosphoglycerate kinase 1 OS=Mus musculus OX=10090 GN=Pgk1 PE=1 SV=4
59	44	P17426|AP2A1_MOUSE	197.94	16	12	14	14300000	15000000	17	11	14	15	Carbamidomethylation	107664	AP-2 complex subunit alpha-1 OS=Mus musculus OX=10090 GN=Ap2a1 PE=1 SV=1
40	74	P60202|MYPR_MOUSE	183.52	61	42	61	1210000000	1330000000	11	11	20	24	Carbamidomethylation; Deamidation N; Oxidation (M)	30077	Myelin proteolipid protein OS=Mus musculus OX=10090 GN=Plp1 PE=1 SV=2
93	68	Q9Z0E0|NCDN_MOUSE	177.39	18	14	16	13100000	22600000	11	11	11	11	Carbamidomethylation	78895	Neurochondrin OS=Mus musculus OX=10090 GN=Ncdn PE=1 SV=1
111	63	Q02053|UBA1_MOUSE	174.06	13	12	8	12600000	11000000	11	11	10	7	Carbamidomethylation	117809	Ubiquitin-like modifier-activating enzyme 1 OS=Mus musculus OX=10090 GN=Uba1 PE=1 SV=1
106	72	Q8BH59|CMC1_MOUSE	169.09	18	16	16	21700000	21900000	11	11	10	10	Carbamidomethylation	74570	Calcium-binding mitochondrial carrier protein Aralar1 OS=Mus musculus OX=10090 GN=Slc25a12 PE=1 SV=1
94	80	P15105|GLNA_MOUSE	201.41	33	29	33	77700000	78100000	10	10	10	11	Carbamidomethylation; Deamidation N	42120	Glutamine synthetase OS=Mus musculus OX=10090 GN=Glul PE=1 SV=6
81	110	P14152|MDHC_MOUSE	181.16	34	33	24	152000000	151000000	10	10	13	12	Carbamidomethylation; Deamidation N	36511	Malate dehydrogenase cytoplasmic OS=Mus musculus OX=10090 GN=Mdh1 PE=1 SV=3
97	130	P12960|CNTN1_MOUSE	179.61	11	8	11	26100000	40900000	10	10	10	12		113388	Contactin-1 OS=Mus musculus OX=10090 GN=Cntn1 PE=1 SV=1
71	107	P26443|DHE3_MOUSE	170.17	19	16	19	59900000	73700000	10	10	11	15	Carbamidomethylation; Deamidation N	61337	Glutamate dehydrogenase 1 mitochondrial OS=Mus musculus OX=10090 GN=Glud1 PE=1 SV=1
70	102	O88935|SYN1_MOUSE	169.74	23	16	20	39200000	63100000	11	10	9	12	Deamidation N	74097	Synapsin-1 OS=Mus musculus OX=10090 GN=Syn1 PE=1 SV=2
86	88	P50516|VATA_MOUSE	163.15	16	16	12	63100000	79700000	10	10	12	11	Deamidation N	68326	V-type proton ATPase catalytic subunit A OS=Mus musculus OX=10090 GN=Atp6v1a PE=1 SV=2
100	108	P31650|S6A11_MOUSE	157.1	16	16	15	34200000	30000000	10	10	10	9	Carbamidomethylation; Deamidation N	69961	Sodium- and chloride-dependent GABA transporter 3 OS=Mus musculus OX=10090 GN=Slc6a11 PE=1 SV=2
126	101	Q01853|TERA_MOUSE	142	13	12	10	31900000	36000000	10	10	9	8	Carbamidomethylation	89322	Transitional endoplasmic reticulum ATPase OS=Mus musculus OX=10090 GN=Vcp PE=1 SV=4
78	89	P05063|ALDOC_MOUSE	194.06	35	31	32	34700000	43500000	13	9	12	14	Carbamidomethylation; Deamidation N	39395	Fructose-bisphosphate aldolase C OS=Mus musculus OX=10090 GN=Aldoc PE=1 SV=4
64	71	P18872|GNAO_MOUSE	192.82	33	33	33	149000000	144000000	11	9	15	16	Carbamidomethylation	40085	Guanine nucleotide-binding protein G(o) subunit alpha OS=Mus musculus OX=10090 GN=Gnao1 PE=1 SV=3
113	104	P38647|GRP75_MOUSE	170.23	16	16	16	12400000	13200000	9	9	9	9		73461	Stress-70 protein mitochondrial OS=Mus musculus OX=10090 GN=Hspa9 PE=1 SV=3
115	131	tr|A0A076FR46|A0A076FR46_MOUSE	166.4	10	6	9	13600000	10900000	9	9	9	8	Deamidation N	125599	KCC2a-S25 variant 1 OS=Mus musculus OX=10090 GN=Slc12a5 PE=1 SV=1
115	132	Q91V14|S12A5_MOUSE	166.4	10	6	9	13600000	10900000	9	9	9	8	Deamidation N	126271	Solute carrier family 12 member 5 OS=Mus musculus OX=10090 GN=Slc12a5 PE=1 SV=2
117	251	P61264|STX1B_MOUSE	161.88	29	29	24	66000000	66000000	9	9	10	8	Phosphoserine (pS)	33245	Syntaxin-1B OS=Mus musculus OX=10090 GN=Stx1b PE=1 SV=1
143	138	Q6ZQ38|CAND1_MOUSE	144.59	8	7	4	10800000	12500000	9	9	7	5	Deamidation N	136331	Cullin-associated NEDD8-dissociated protein 1 OS=Mus musculus OX=10090 GN=Cand1 PE=1 SV=2
122	136	tr|Q3TWV4|Q3TWV4_MOUSE	140.28	19	17	16	32300000	34200000	9	9	8	8	Carbamidomethylation	49389	AP-2 complex subunit mu OS=Mus musculus OX=10090 GN=Ap2m1 PE=1 SV=1
122	137	P84091|AP2M1_MOUSE	140.28	19	17	16	32300000	34200000	9	9	8	8	Carbamidomethylation	49655	AP-2 complex subunit mu OS=Mus musculus OX=10090 GN=Ap2m1 PE=1 SV=1
98	134	Q8VEM8|MPCP_MOUSE	135.88	22	18	22	84300000	112000000	9	9	10	13		39632	Phosphate carrier protein mitochondrial OS=Mus musculus OX=10090 GN=Slc25a3 PE=1 SV=1
56	103	Q04447|KCRB_MOUSE	207.95	36	36	36	111000000	143000000	10	8	17	17	Carbamidomethylation; Deamidation N	42713	Creatine kinase B-type OS=Mus musculus OX=10090 GN=Ckb PE=1 SV=1
42	465	P0DP26|CALM1_MOUSE	199.86	32	32	32	392000000	415000000	8	8	20	20	Deamidation N	16838	Calmodulin-1 OS=Mus musculus OX=10090 GN=Calm1 PE=1 SV=1
42	464	P0DP28|CALM3_MOUSE	199.86	32	32	32	392000000	415000000	8	8	20	20	Deamidation N	16838	Calmodulin-3 OS=Mus musculus OX=10090 GN=Calm3 PE=1 SV=1
42	463	P0DP27|CALM2_MOUSE	199.86	32	32	32	392000000	415000000	8	8	20	20	Deamidation N	16838	Calmodulin-2 OS=Mus musculus OX=10090 GN=Calm2 PE=1 SV=1
42	466	tr|Q3UKW2|Q3UKW2_MOUSE	199.86	24	24	24	392000000	415000000	8	8	20	20	Deamidation N	21560	Calmodulin-1 OS=Mus musculus OX=10090 GN=Calm1 PE=1 SV=1
47	229	tr|Q91VB8|Q91VB8_MOUSE	190.77	51	51	51	667000000	736000000	8	8	16	17		15112	Alpha globin 1 OS=Mus musculus OX=10090 GN=Hba-a1 PE=1 SV=1
47	228	P01942|HBA_MOUSE	190.77	51	51	51	667000000	736000000	8	8	16	17		15085	Hemoglobin subunit alpha OS=Mus musculus OX=10090 GN=Hba PE=1 SV=2
95	126	P16125|LDHB_MOUSE	175.1	30	27	26	79100000	72100000	10	8	11	11	Carbamidomethylation; Deamidation N	36572	L-lactate dehydrogenase B chain OS=Mus musculus OX=10090 GN=Ldhb PE=1 SV=2
107	109	P46096|SYT1_MOUSE	174.29	26	23	19	46700000	57800000	10	8	10	10		47418	Synaptotagmin-1 OS=Mus musculus OX=10090 GN=Syt1 PE=1 SV=1
114	119	P06745|G6PI_MOUSE	167.42	19	19	18	50800000	47300000	9	8	9	9	Deamidation N	62767	Glucose-6-phosphate isomerase OS=Mus musculus OX=10090 GN=Gpi PE=1 SV=4
72	333	tr|F6VME3|F6VME3_MOUSE	163.69	38	38	38	286000000	319000000	8	8	13	14	Oxidation (M)	20948	Myelin basic protein (Fragment) OS=Mus musculus OX=10090 GN=Mbp PE=1 SV=1
72	334	tr|F6RT34|F6RT34_MOUSE	163.69	35	35	35	286000000	319000000	8	8	13	14	Oxidation (M)	23205	Myelin basic protein (Fragment) OS=Mus musculus OX=10090 GN=Mbp PE=1 SV=1
177	166	Q9CR62|M2OM_MOUSE	162.45	26	22	13	16400000	13000000	8	8	8	5	Deamidation N	34155	Mitochondrial 2-oxoglutarate/malate carrier protein OS=Mus musculus OX=10090 GN=Slc25a11 PE=1 SV=3
131	253	P17742|PPIA_MOUSE	161.47	43	31	43	102000000	87900000	8	8	7	10	Carbamidomethylation; Deamidation N	17971	Peptidyl-prolyl cis-trans isomerase A OS=Mus musculus OX=10090 GN=Ppia PE=1 SV=2
136	184	Q9D6R2|IDH3A_MOUSE	160.35	19	19	19	200000000	260000000	8	8	8	8	Carbamidomethylation	39639	Isocitrate dehydrogenase [NAD] subunit alpha mitochondrial OS=Mus musculus OX=10090 GN=Idh3a PE=1 SV=1
136	185	tr|A0A1L1STE6|A0A1L1STE6_MOUSE	160.35	18	18	18	200000000	260000000	8	8	8	8	Carbamidomethylation	41520	Isocitrate dehydrogenase [NAD] subunit mitochondrial OS=Mus musculus OX=10090 GN=Idh3a PE=1 SV=1
127	121	tr|A0A1B0GSR9|A0A1B0GSR9_MOUSE	158.93	30	25	30	40100000	49000000	9	8	8	9	Carbamidomethylation	34599	L-lactate dehydrogenase OS=Mus musculus OX=10090 GN=Ldha PE=1 SV=1
127	123	P06151|LDHA_MOUSE	158.93	28	23	28	40100000	49000000	9	8	8	9	Carbamidomethylation	36499	L-lactate dehydrogenase A chain OS=Mus musculus OX=10090 GN=Ldha PE=1 SV=3
127	122	tr|Q564E2|Q564E2_MOUSE	158.93	28	23	28	40100000	49000000	9	8	8	9	Carbamidomethylation	36499	L-lactate dehydrogenase OS=Mus musculus OX=10090 GN=Ldha PE=1 SV=1
127	124	tr|A0A1B0GSX0|A0A1B0GSX0_MOUSE	158.93	26	22	26	40100000	49000000	9	8	8	9	Carbamidomethylation	39758	L-lactate dehydrogenase OS=Mus musculus OX=10090 GN=Ldha PE=1 SV=1
103	140	Q60932|VDAC1_MOUSE	158.91	32	29	25	69000000	70600000	9	8	11	9	Carbamidomethylation; Deamidation N	32351	Voltage-dependent anion-selective channel protein 1 OS=Mus musculus OX=10090 GN=Vdac1 PE=1 SV=3
79	116	O55131|SEPT7_MOUSE	158.91	23	23	23	15900000	21300000	9	8	13	14	Carbamidomethylation; Deamidation N	50550	Septin-7 OS=Mus musculus OX=10090 GN=Sept7 PE=1 SV=1
79	118	tr|E9Q9F5|E9Q9F5_MOUSE	158.91	23	23	23	15900000	21300000	9	8	13	14	Carbamidomethylation; Deamidation N	50681	Septin-7 OS=Mus musculus OX=10090 GN=Sept7 PE=1 SV=2
79	117	tr|E9Q1G8|E9Q1G8_MOUSE	158.91	23	23	23	15900000	21300000	9	8	13	14	Carbamidomethylation; Deamidation N	50649	Septin-7 OS=Mus musculus OX=10090 GN=Sept7 PE=1 SV=2
133	114	Q8K0U4|HS12A_MOUSE	151.18	15	13	15	4640000	9640000	9	8	7	9		74871	Heat shock 70 kDa protein 12A OS=Mus musculus OX=10090 GN=Hspa12a PE=1 SV=1
80	94	P08553|NFM_MOUSE	143.61	12	12	9	5730000	4960000	11	8	12	9		95916	Neurofilament medium polypeptide OS=Mus musculus OX=10090 GN=Nefm PE=1 SV=4
146	164	Q9Z2I9|SUCB1_MOUSE	143.2	19	12	19	28600000	32800000	8	8	6	8	Carbamidomethylation; Deamidation N	50114	Succinate--CoA ligase [ADP-forming] subunit beta mitochondrial OS=Mus musculus OX=10090 GN=Sucla2 PE=1 SV=2
135	143	P08113|ENPL_MOUSE	138.4	11	11	7	20400000	4790000	9	8	9	5		92476	Endoplasmin OS=Mus musculus OX=10090 GN=Hsp90b1 PE=1 SV=2
110	195	Q9CZ13|QCR1_MOUSE	180.38	18	13	18	28000000	38100000	8	7	7	10	Carbamidomethylation; Deamidation N	52852	Cytochrome b-c1 complex subunit 1 mitochondrial OS=Mus musculus OX=10090 GN=Uqcrc1 PE=1 SV=2
88	330	P06837|NEUM_MOUSE	174.01	33	33	25	21800000	25600000	7	7	15	9		23632	Neuromodulin OS=Mus musculus OX=10090 GN=Gap43 PE=1 SV=1
118	352	P26645|MARCS_MOUSE	172.48	24	24	16	27800000	18600000	7	7	11	5	Deamidation N	29661	Myristoylated alanine-rich C-kinase substrate OS=Mus musculus OX=10090 GN=Marcks PE=1 SV=2
166	221	Q9R0P9|UCHL1_MOUSE	166.6	45	35	38	72500000	105000000	7	7	7	6	Carbamidomethylation; Deamidation N	24838	Ubiquitin carboxyl-terminal hydrolase isozyme L1 OS=Mus musculus OX=10090 GN=Uchl1 PE=1 SV=1
83	303	P35802|GPM6A_MOUSE	165.6	35	18	35	139000000	127000000	8	7	13	12	Carbamidomethylation	31149	Neuronal membrane glycoprotein M6-a OS=Mus musculus OX=10090 GN=Gpm6a PE=1 SV=1
254	182	Q8BFR5|EFTU_MOUSE	165.44	20	13	13	4390000	3530000	7	7	4	5	Carbamidomethylation	49508	Elongation factor Tu mitochondrial OS=Mus musculus OX=10090 GN=Tufm PE=1 SV=1
137	230	Q9D0M3|CY1_MOUSE	160.21	27	20	23	13500000	28800000	7	7	6	7	Carbamidomethylation; Deamidation N; HexNac	35328	Cytochrome c1 heme protein mitochondrial OS=Mus musculus OX=10090 GN=Cyc1 PE=1 SV=1
159	193	Q61644|PACN1_MOUSE	158.1	18	17	18	15100000	30000000	7	7	6	7	Carbamidomethylation; Deamidation N	50575	Protein kinase C and casein kinase substrate in neurons protein 1 OS=Mus musculus OX=10090 GN=Pacsin1 PE=1 SV=1
157	181	P97300|NPTN_MOUSE	157.92	21	13	21	20000000	32000000	7	7	6	8	Carbamidomethylation	44373	Neuroplastin OS=Mus musculus OX=10090 GN=Nptn PE=1 SV=3
167	259	Q9DCX2|ATP5H_MOUSE	157.35	43	43	34	45500000	35900000	7	7	8	6	Carbamidomethylation	18749	ATP synthase subunit d mitochondrial OS=Mus musculus OX=10090 GN=Atp5pd PE=1 SV=3
128	186	tr|K3W4T3|K3W4T3_MOUSE	150.47	9	9	9	17700000	20900000	7	7	8	9	Carbamidomethylation	96427	V-type proton ATPase subunit a OS=Mus musculus OX=10090 GN=Atp6v0a1 PE=1 SV=1
128	187	Q9Z1G4|VPP1_MOUSE	150.47	9	9	9	17700000	20900000	7	7	8	9	Carbamidomethylation	96467	V-type proton ATPase 116 kDa subunit a isoform 1 OS=Mus musculus OX=10090 GN=Atp6v0a1 PE=1 SV=3
163	207	O08749|DLDH_MOUSE	146.99	16	15	13	31600000	33700000	7	7	7	7	Carbamidomethylation	54272	Dihydrolipoyl dehydrogenase mitochondrial OS=Mus musculus OX=10090 GN=Dld PE=1 SV=2
170	395	P18760|COF1_MOUSE	146.6	35	18	35	44400000	71100000	7	7	5	9	Carbamidomethylation	18560	Cofilin-1 OS=Mus musculus OX=10090 GN=Cfl1 PE=1 SV=3
170	396	tr|F8WGL3|F8WGL3_MOUSE	146.6	26	13	26	44400000	71100000	7	7	5	9	Carbamidomethylation	24576	Cofilin-1 OS=Mus musculus OX=10090 GN=Cfl1 PE=1 SV=1
215	213	Q8CI94|PYGB_MOUSE	146.2	9	8	7	7790000	9740000	7	7	6	5	Deamidation N	96730	Glycogen phosphorylase brain form OS=Mus musculus OX=10090 GN=Pygb PE=1 SV=3
217	227	Q9QYC0|ADDA_MOUSE	141.81	13	11	9	7110000	5310000	7	7	6	5	Deamidation N	80647	Alpha-adducin OS=Mus musculus OX=10090 GN=Add1 PE=1 SV=2
129	208	Q8BMF4|ODP2_MOUSE	137.08	12	12	9	22000000	16500000	7	7	8	6	Carbamidomethylation	67942	Dihydrolipoyllysine-residue acetyltransferase component of pyruvate dehydrogenase complex mitochondrial OS=Mus musculus OX=10090 GN=Dlat PE=1 SV=2
161	201	tr|E9PZ00|E9PZ00_MOUSE	133.14	13	13	13	22300000	27100000	7	7	7	7	Carbamidomethylation	60672	Prosaposin OS=Mus musculus OX=10090 GN=Psap PE=1 SV=1
161	202	tr|Q8BFQ1|Q8BFQ1_MOUSE	133.14	13	13	13	22300000	27100000	7	7	7	7	Carbamidomethylation	61051	Prosaposin OS=Mus musculus OX=10090 GN=Psap PE=1 SV=1
161	203	tr|K3W4L3|K3W4L3_MOUSE	133.14	13	13	13	22300000	27100000	7	7	7	7	Carbamidomethylation	61292	Prosaposin OS=Mus musculus OX=10090 GN=Psap PE=1 SV=1
161	205	Q61207|SAP_MOUSE	133.14	13	13	13	22300000	27100000	7	7	7	7	Carbamidomethylation	61422	Prosaposin OS=Mus musculus OX=10090 GN=Psap PE=1 SV=2
161	204	tr|J3QPG5|J3QPG5_MOUSE	133.14	13	13	13	22300000	27100000	7	7	7	7	Carbamidomethylation	61363	Prosaposin OS=Mus musculus OX=10090 GN=Psap PE=1 SV=1
164	210	tr|A7E1Z5|A7E1Z5_MOUSE	128.32	8	6	8	12000000	14100000	7	7	6	7	Carbamidomethylation; Deamidation N	120464	Anion exchange protein OS=Mus musculus OX=10090 GN=Slc4a4 PE=1 SV=1
164	211	O88343|S4A4_MOUSE	128.32	8	6	8	12000000	14100000	7	7	6	7	Carbamidomethylation; Deamidation N	121483	Electrogenic sodium bicarbonate cotransporter 1 OS=Mus musculus OX=10090 GN=Slc4a4 PE=1 SV=2
164	212	tr|E9Q8N8|E9Q8N8_MOUSE	128.32	8	6	8	12000000	14100000	7	7	6	7	Carbamidomethylation; Deamidation N	123086	Anion exchange protein OS=Mus musculus OX=10090 GN=Slc4a4 PE=1 SV=1
147	198	tr|K4DI76|K4DI76_MOUSE	123.68	6	5	5	8440000	11500000	7	7	6	6	Carbamidomethylation	153057	Calcium-dependent secretion activator 1 OS=Mus musculus OX=10090 GN=Cadps PE=1 SV=1
147	199	Q80TJ1|CAPS1_MOUSE	123.68	6	5	5	8440000	11500000	7	7	6	6	Carbamidomethylation	153112	Calcium-dependent secretion activator 1 OS=Mus musculus OX=10090 GN=Cadps PE=1 SV=3
147	200	tr|J3QJW3|J3QJW3_MOUSE	123.68	6	5	5	8440000	11500000	7	7	6	6	Carbamidomethylation	153229	Calcium-dependent secretion activator 1 OS=Mus musculus OX=10090 GN=Cadps PE=1 SV=1
205	318	P27773|PDIA3_MOUSE	115.2	14	10	11	6680000	4460000	7	7	5	5		56678	Protein disulfide-isomerase A3 OS=Mus musculus OX=10090 GN=Pdia3 PE=1 SV=2
202	310	P14211|CALR_MOUSE	107.87	12	10	9	16600000	29700000	7	7	5	7		47995	Calreticulin OS=Mus musculus OX=10090 GN=Calr PE=1 SV=1
207	409	Q9CZW5|TOM70_MOUSE	86.45	9	9	5	12800000	10400000	7	7	7	4		67590	Mitochondrial import receptor subunit TOM70 OS=Mus musculus OX=10090 GN=Tomm70 PE=1 SV=2
11	79	P02088|HBB1_MOUSE	237.92	81	76	80	480000000	545000000	16	6	45	57	Carbamidomethylation; Deamidation N; Oxidation (M)	15840	Hemoglobin subunit beta-1 OS=Mus musculus OX=10090 GN=Hbb-b1 PE=1 SV=2
76	66	Q9DBG3|AP2B1_MOUSE	186.4	12	12	11	19500000	19600000	12	6	14	12	Carbamidomethylation	104583	AP-2 complex subunit beta OS=Mus musculus OX=10090 GN=Ap2b1 PE=1 SV=1
66	92	P62631|EF1A2_MOUSE	176.34	25	25	23	17800000	24200000	12	6	15	14	Deamidation N	50454	Elongation factor 1-alpha 2 OS=Mus musculus OX=10090 GN=Eef1a2 PE=1 SV=1
54	150	P63101|1433Z_MOUSE	172.74	38	38	31	128000000	129000000	9	6	19	18	Carbamidomethylation; Deamidation N	27771	14-3-3 protein zeta/delta OS=Mus musculus OX=10090 GN=Ywhaz PE=1 SV=1
134	139	P20029|BIP_MOUSE	170.33	15	11	12	6300000	8940000	8	6	8	7		72422	Endoplasmic reticulum chaperone BiP OS=Mus musculus OX=10090 GN=Hspa5 PE=1 SV=3
108	156	P50396|GDIA_MOUSE	164.33	21	21	18	24000000	22400000	9	6	11	9	Carbamidomethylation; Deamidation N	50522	Rab GDP dissociation inhibitor alpha OS=Mus musculus OX=10090 GN=Gdi1 PE=1 SV=3
90	172	Q64332|SYN2_MOUSE	163.96	15	11	12	28100000	30600000	7	6	8	9		63373	Synapsin-2 OS=Mus musculus OX=10090 GN=Syn2 PE=1 SV=2
121	112	P63328|PP2BA_MOUSE	162.68	19	17	17	52600000	64000000	9	6	9	9		58644	Serine/threonine-protein phosphatase 2B catalytic subunit alpha isoform OS=Mus musculus OX=10090 GN=Ppp3ca PE=1 SV=1
158	188	P30275|KCRU_MOUSE	155.41	26	22	20	43700000	21800000	8	6	7	7	Carbamidomethylation; Deamidation N	47004	Creatine kinase U-type mitochondrial OS=Mus musculus OX=10090 GN=Ckmt1 PE=1 SV=1
196	252	P61922|GABT_MOUSE	152.22	17	9	17	14600000	19800000	6	6	4	6	Carbamidomethylation; Deamidation N	56452	4-aminobutyrate aminotransferase mitochondrial OS=Mus musculus OX=10090 GN=Abat PE=1 SV=1
102	127	P11798|KCC2A_MOUSE	151.05	20	20	16	20200000	25200000	9	6	10	10		54115	Calcium/calmodulin-dependent protein kinase type II subunit alpha OS=Mus musculus OX=10090 GN=Camk2a PE=1 SV=2
102	128	tr|F8WIS9|F8WIS9_MOUSE	151.05	19	19	15	20200000	25200000	9	6	10	10		55347	Calcium/calmodulin-dependent protein kinase type II subunit alpha OS=Mus musculus OX=10090 GN=Camk2a PE=1 SV=1
109	175	P14873|MAP1B_MOUSE	150.59	4	3	2	26300000	3780000	7	6	6	4	Carbamidomethylation; Deamidation N	270252	Microtubule-associated protein 1B OS=Mus musculus OX=10090 GN=Map1b PE=1 SV=2
192	191	tr|Q50HX3|Q50HX3_MOUSE	147.69	48	26	44	4170000	7490000	7	6	5	7	Deamidation N	21889	RAB14 protein variant OS=Mus musculus OX=10090 GN=Rab14 PE=1 SV=1
192	192	Q91V41|RAB14_MOUSE	147.69	44	24	40	4170000	7490000	7	6	5	7	Deamidation N	23897	Ras-related protein Rab-14 OS=Mus musculus OX=10090 GN=Rab14 PE=1 SV=3
193	217	Q8QZT1|THIL_MOUSE	146.6	20	13	16	8720000	10900000	7	6	5	7		44816	Acetyl-CoA acetyltransferase mitochondrial OS=Mus musculus OX=10090 GN=Acat1 PE=1 SV=1
238	276	Q8K2B3|SDHA_MOUSE	144.32	12	11	10	8970000	14100000	6	6	5	5	Carbamidomethylation	72585	Succinate dehydrogenase [ubiquinone] flavoprotein subunit mitochondrial OS=Mus musculus OX=10090 GN=Sdha PE=1 SV=1
139	335	P99029|PRDX5_MOUSE	144.29	32	32	32	42300000	44700000	6	6	8	8	Carbamidomethylation	21897	Peroxiredoxin-5 mitochondrial OS=Mus musculus OX=10090 GN=Prdx5 PE=1 SV=2
139	336	tr|H3BJQ7|H3BJQ7_MOUSE	144.29	31	31	31	42300000	44700000	6	6	8	8	Carbamidomethylation	22677	Peroxiredoxin OS=Mus musculus OX=10090 GN=Prdx5 PE=1 SV=1
105	234	tr|Q8C2Q8|Q8C2Q8_MOUSE	142.56	23	23	23	46200000	51600000	6	6	8	8	Carbamidomethylation	30256	ATP synthase subunit gamma OS=Mus musculus OX=10090 GN=Atp5c1 PE=1 SV=1
105	235	tr|A2AKU9|A2AKU9_MOUSE	142.56	21	21	21	46200000	51600000	6	6	8	8	Carbamidomethylation	32771	ATP synthase subunit gamma OS=Mus musculus OX=10090 GN=Atp5c1 PE=1 SV=1
105	236	Q91VR2|ATPG_MOUSE	142.56	21	21	21	46200000	51600000	6	6	8	8	Carbamidomethylation	32886	ATP synthase subunit gamma mitochondrial OS=Mus musculus OX=10090 GN=Atp5f1c PE=1 SV=1
218	237	P40124|CAP1_MOUSE	141.18	16	8	16	7550000	10800000	6	6	4	6	Carbamidomethylation	51565	Adenylyl cyclase-associated protein 1 OS=Mus musculus OX=10090 GN=Cap1 PE=1 SV=4
237	267	tr|A0A0A6YW88|A0A0A6YW88_MOUSE	138.33	15	8	15	5850000	9730000	6	6	4	6	Carbamidomethylation	51675	CaM kinase-like vesicle-associated protein OS=Mus musculus OX=10090 GN=Camkv PE=1 SV=1
237	268	Q3UHL1|CAMKV_MOUSE	138.33	14	8	14	5850000	9730000	6	6	4	6	Carbamidomethylation	54819	CaM kinase-like vesicle-associated protein OS=Mus musculus OX=10090 GN=Camkv PE=1 SV=2
140	403	Q9DB20|ATPO_MOUSE	137.65	25	20	25	47800000	53000000	6	6	7	7		23364	ATP synthase subunit O mitochondrial OS=Mus musculus OX=10090 GN=Atp5po PE=1 SV=1
150	358	Q61171|PRDX2_MOUSE	137.12	27	27	27	29700000	40200000	6	6	7	7		21779	Peroxiredoxin-2 OS=Mus musculus OX=10090 GN=Prdx2 PE=1 SV=3
241	301	P40142|TKT_MOUSE	136.8	10	7	9	13800000	19700000	6	6	5	5		67631	Transketolase OS=Mus musculus OX=10090 GN=Tkt PE=1 SV=1
200	304	tr|E9Q6Q4|E9Q6Q4_MOUSE	135.57	12	12	12	6630000	8690000	6	6	6	6		60793	RAP1 GTP-GDP dissociation stimulator 1 OS=Mus musculus OX=10090 GN=Rap1gds1 PE=1 SV=1
200	305	tr|Q3TU36|Q3TU36_MOUSE	135.57	11	11	11	6630000	8690000	6	6	6	6		66005	RAP1 GTP-GDP dissociation stimulator 1 OS=Mus musculus OX=10090 GN=Rap1gds1 PE=1 SV=1
200	306	tr|E9Q912|E9Q912_MOUSE	135.57	11	11	11	6630000	8690000	6	6	6	6		66077	RAP1 GTP-GDP dissociation stimulator 1 OS=Mus musculus OX=10090 GN=Rap1gds1 PE=1 SV=1
178	261	tr|D3Z0Y2|D3Z0Y2_MOUSE	135.54	31	31	28	30200000	25100000	6	6	7	6	Carbamidomethylation; Deamidation N	22494	Peroxiredoxin-6 OS=Mus musculus OX=10090 GN=Prdx6 PE=1 SV=1
178	264	O08709|PRDX6_MOUSE	135.54	28	28	25	30200000	25100000	6	6	7	6	Carbamidomethylation; Deamidation N	24871	Peroxiredoxin-6 OS=Mus musculus OX=10090 GN=Prdx6 PE=1 SV=3
178	263	tr|Q6GT24|Q6GT24_MOUSE	135.54	28	28	25	30200000	25100000	6	6	7	6	Carbamidomethylation; Deamidation N	24827	Peroxiredoxin-6 OS=Mus musculus OX=10090 GN=Prdx6 PE=1 SV=1
197	254	tr|Q91VA7|Q91VA7_MOUSE	135.08	16	16	14	22600000	18800000	6	6	6	6		42195	Isocitrate dehydrogenase [NAD] subunit mitochondrial OS=Mus musculus OX=10090 GN=Idh3b PE=1 SV=1
206	376	P97807|FUMH_MOUSE	135.06	11	11	11	12700000	16800000	6	6	6	6		54357	Fumarate hydratase mitochondrial OS=Mus musculus OX=10090 GN=Fh PE=1 SV=3
220	255	Q61553|FSCN1_MOUSE	134.73	13	13	10	9410000	12500000	6	6	6	5	Carbamidomethylation	54508	Fascin OS=Mus musculus OX=10090 GN=Fscn1 PE=1 SV=4
290	260	tr|Q3U4F0|Q3U4F0_MOUSE	130.88	26	15	19	9720000	8720000	6	6	4	4		30952	Sideroflexin-3 OS=Mus musculus OX=10090 GN=Sfxn3 PE=1 SV=1
290	262	Q91V61|SFXN3_MOUSE	130.88	23	13	16	9720000	8720000	6	6	4	4		35406	Sideroflexin-3 OS=Mus musculus OX=10090 GN=Sfxn3 PE=1 SV=1
256	257	tr|A0A0G2JEU1|A0A0G2JEU1_MOUSE	129.25	16	16	6	4160000	1480000	6	6	6	2		51350	Aldehyde dehydrogenase mitochondrial OS=Mus musculus OX=10090 GN=Aldh2 PE=1 SV=1
256	258	P47738|ALDH2_MOUSE	129.25	15	15	5	4160000	1480000	6	6	6	2		56538	Aldehyde dehydrogenase mitochondrial OS=Mus musculus OX=10090 GN=Aldh2 PE=1 SV=1
148	275	P51863|VA0D1_MOUSE	128.16	18	15	18	19300000	19600000	6	6	7	8	Carbamidomethylation	40301	V-type proton ATPase subunit d 1 OS=Mus musculus OX=10090 GN=Atp6v0d1 PE=1 SV=2
255	241	Q810U3|NFASC_MOUSE	127.95	6	5	3	6180000	575000	6	6	5	3	Carbamidomethylation; Deamidation N	137975	Neurofascin OS=Mus musculus OX=10090 GN=Nfasc PE=1 SV=1
255	242	tr|A0A087WPX3|A0A087WPX3_MOUSE	127.95	5	4	3	6180000	575000	6	6	5	3	Carbamidomethylation; Deamidation N	150357	Neurofascin OS=Mus musculus OX=10090 GN=Nfasc PE=1 SV=1
195	243	Q91VD9|NDUS1_MOUSE	126.85	9	7	8	9840000	14700000	6	6	5	5	Carbamidomethylation	79777	NADH-ubiquinone oxidoreductase 75 kDa subunit mitochondrial OS=Mus musculus OX=10090 GN=Ndufs1 PE=1 SV=2
219	238	tr|F6QYF8|F6QYF8_MOUSE	126.6	7	6	5	4140000	7320000	6	6	5	4		98529	Aminopeptidase (Fragment) OS=Mus musculus OX=10090 GN=Npepps PE=1 SV=1
219	239	tr|E9Q039|E9Q039_MOUSE	126.6	7	6	5	4140000	7320000	6	6	5	4		100128	Aminopeptidase OS=Mus musculus OX=10090 GN=Npepps PE=1 SV=1
219	240	Q11011|PSA_MOUSE	126.6	7	6	5	4140000	7320000	6	6	5	4		103325	Puromycin-sensitive aminopeptidase OS=Mus musculus OX=10090 GN=Npepps PE=1 SV=2
194	231	P10852|4F2_MOUSE	125.54	13	13	9	7620000	7120000	6	6	6	4		58337	4F2 cell-surface antigen heavy chain OS=Mus musculus OX=10090 GN=Slc3a2 PE=1 SV=1
144	145	tr|Q68FG2|Q68FG2_MOUSE	122.76	4	3	3	2640000	4010000	8	6	6	6	Carbamidomethylation; Deamidation N	270921	Spectrin beta chain OS=Mus musculus OX=10090 GN=Sptbn2 PE=1 SV=1
199	302	Q76MZ3|2AAA_MOUSE	118.21	10	8	10	18100000	27000000	6	6	5	7	Carbamidomethylation	65323	Serine/threonine-protein phosphatase 2A 65 kDa regulatory subunit A alpha isoform OS=Mus musculus OX=10090 GN=Ppp2r1a PE=1 SV=3
216	222	tr|A0A3B2WD96|A0A3B2WD96_MOUSE	117.65	9	5	6	5550000	16800000	7	6	4	5	Carbamidomethylation	90203	Band 4.1-like protein 3 OS=Mus musculus OX=10090 GN=Epb41l3 PE=1 SV=1
216	226	Q9WV92|E41L3_MOUSE	117.65	8	5	5	5550000	16800000	7	6	4	5	Carbamidomethylation	103338	Band 4.1-like protein 3 OS=Mus musculus OX=10090 GN=Epb41l3 PE=1 SV=1
203	312	Q61316|HSP74_MOUSE	114.57	7	5	6	4860000	6750000	6	6	5	5		94133	Heat shock 70 kDa protein 4 OS=Mus musculus OX=10090 GN=Hspa4 PE=1 SV=1
203	313	tr|Q3U2G2|Q3U2G2_MOUSE	114.57	7	5	6	4860000	6750000	6	6	5	5		94209	Heat shock 70 kDa protein 4 OS=Mus musculus OX=10090 GN=Hspa4 PE=1 SV=1
239	290	P67778|PHB_MOUSE	112.61	21	14	21	7740000	11000000	6	6	4	6		29820	Prohibitin OS=Mus musculus OX=10090 GN=Phb PE=1 SV=1
101	147	P17183|ENOG_MOUSE	186.96	24	16	20	45200000	55100000	8	5	8	9	Carbamidomethylation	47297	Gamma-enolase OS=Mus musculus OX=10090 GN=Eno2 PE=1 SV=2
35	67	P48962|ADT1_MOUSE	181.87	38	38	38	131000000	142000000	11	5	24	24	Carbamidomethylation; Deamidation N	32904	ADP/ATP translocase 1 OS=Mus musculus OX=10090 GN=Slc25a4 PE=1 SV=4
58	152	P68254|1433T_MOUSE	162.38	34	34	34	23900000	19700000	9	5	17	17	Carbamidomethylation; Deamidation N	27778	14-3-3 protein theta OS=Mus musculus OX=10090 GN=Ywhaq PE=1 SV=1
58	153	tr|F6YY69|F6YY69_MOUSE	162.38	29	29	29	23900000	19700000	9	5	17	17	Carbamidomethylation; Deamidation N	32341	14-3-3 protein theta (Fragment) OS=Mus musculus OX=10090 GN=Ywhaq PE=1 SV=1
58	154	tr|F6VW30|F6VW30_MOUSE	162.38	27	27	27	23900000	19700000	9	5	17	17	Carbamidomethylation; Deamidation N	34349	14-3-3 protein theta (Fragment) OS=Mus musculus OX=10090 GN=Ywhaq PE=1 SV=1
119	77	P17427|AP2A2_MOUSE	156.32	11	6	11	5420000	12300000	11	5	6	11	Carbamidomethylation	104016	AP-2 complex subunit alpha-2 OS=Mus musculus OX=10090 GN=Ap2a2 PE=1 SV=2
172	461	tr|A0A1L1SUX8|A0A1L1SUX8_MOUSE	152.71	41	41	41	131000000	140000000	5	5	7	7	Carbamidomethylation	14038	Thy-1 membrane glycoprotein (Fragment) OS=Mus musculus OX=10090 GN=Thy1 PE=1 SV=1
172	462	P01831|THY1_MOUSE	152.71	31	31	31	131000000	140000000	5	5	7	7	Carbamidomethylation	18080	Thy-1 membrane glycoprotein OS=Mus musculus OX=10090 GN=Thy1 PE=1 SV=1
149	299	Q8VDQ8|SIR2_MOUSE	149.32	22	22	16	13900000	15900000	6	5	7	5	Carbamidomethylation; Deamidation N	43256	NAD-dependent protein deacetylase sirtuin-2 OS=Mus musculus OX=10090 GN=Sirt2 PE=1 SV=2
224	340	tr|B2M1R6|B2M1R6_MOUSE	144.05	14	14	11	11500000	6710000	5	5	6	5	Carbamidomethylation	48562	Heterogeneous nuclear ribonucleoprotein K OS=Mus musculus OX=10090 GN=Hnrnpk PE=1 SV=1
224	341	P61979|HNRPK_MOUSE	144.05	13	13	11	11500000	6710000	5	5	6	5	Carbamidomethylation	50976	Heterogeneous nuclear ribonucleoprotein K OS=Mus musculus OX=10090 GN=Hnrnpk PE=1 SV=1
179	323	Q61548|AP180_MOUSE	139.93	7	4	7	2230000	23300000	5	5	3	6	Deamidation N	91851	Clathrin coat assembly protein AP180 OS=Mus musculus OX=10090 GN=Snap91 PE=1 SV=1
222	326	O55143|AT2A2_MOUSE	138.03	6	6	5	68600000	11200000	5	5	5	4	Carbamidomethylation	114858	Sarcoplasmic/endoplasmic reticulum calcium ATPase 2 OS=Mus musculus OX=10090 GN=Atp2a2 PE=1 SV=2
162	206	P46660|AINX_MOUSE	132.9	14	10	13	6690000	12100000	8	5	6	7		55383	Alpha-internexin OS=Mus musculus OX=10090 GN=Ina PE=1 SV=3
182	365	P47857|PFKAM_MOUSE	131.59	8	8	8	11000000	12100000	5	5	5	5		85269	ATP-dependent 6-phosphofructokinase muscle type OS=Mus musculus OX=10090 GN=Pfkm PE=1 SV=3
227	431	P62827|RAN_MOUSE	131.53	21	18	21	13300000	17000000	5	5	4	5	Carbamidomethylation; Deamidation N	24423	GTP-binding nuclear protein Ran OS=Mus musculus OX=10090 GN=Ran PE=1 SV=3
258	317	Q9R111|GUAD_MOUSE	127.29	11	10	9	5920000	7930000	5	5	4	4		51013	Guanine deaminase OS=Mus musculus OX=10090 GN=Gda PE=1 SV=1
152	405	Q8C8R3|ANK2_MOUSE	124.49	2	2	1	1580000	2150000	7	5	6	5		426265	Ankyrin-2 OS=Mus musculus OX=10090 GN=Ank2 PE=1 SV=2
152	406	tr|S4R2F3|S4R2F3_MOUSE	124.49	2	2	1	1580000	2150000	7	5	6	5		429112	Ankyrin-2 OS=Mus musculus OX=10090 GN=Ank2 PE=1 SV=3
168	349	P00920|CAH2_MOUSE	121.65	22	22	22	29700000	40500000	5	5	6	7		29033	Carbonic anhydrase 2 OS=Mus musculus OX=10090 GN=Ca2 PE=1 SV=4
259	342	Q9D8E6|RL4_MOUSE	120.66	15	11	15	3220000	7080000	5	5	4	5		47154	60S ribosomal protein L4 OS=Mus musculus OX=10090 GN=Rpl4 PE=1 SV=3
153	605	Q62277|SYPH_MOUSE	120.23	19	17	10	58900000	60800000	5	5	6	6	Carbamidomethylation	34025	Synaptophysin OS=Mus musculus OX=10090 GN=Syp PE=1 SV=2
292	356	tr|Q3U4W8|Q3U4W8_MOUSE	120.06	7	6	5	2850000	2490000	5	5	4	4		93355	Ubiquitin carboxyl-terminal hydrolase OS=Mus musculus OX=10090 GN=Usp5 PE=1 SV=1
292	357	P56399|UBP5_MOUSE	120.06	6	5	5	2850000	2490000	5	5	4	4		95833	Ubiquitin carboxyl-terminal hydrolase 5 OS=Mus musculus OX=10090 GN=Usp5 PE=1 SV=1
240	300	O08539|BIN1_MOUSE	119.38	11	10	9	6460000	10600000	6	5	5	5		64470	Myc box-dependent-interacting protein 1 OS=Mus musculus OX=10090 GN=Bin1 PE=1 SV=1
223	328	tr|A0A338P6R8|A0A338P6R8_MOUSE	118.85	13	13	9	31800000	21700000	5	5	6	4	Carbamidomethylation	41950	Uncharacterized protein OS=Mus musculus OX=10090 GN=Gm49601 PE=3 SV=1
223	329	tr|A0A338P769|A0A338P769_MOUSE	118.85	13	13	9	31800000	21700000	5	5	6	4	Carbamidomethylation	43816	Septin-5 OS=Mus musculus OX=10090 GN=Sept5 PE=1 SV=1
151	388	P19783|COX41_MOUSE	118.09	28	22	28	46900000	52900000	6	5	5	7		19530	Cytochrome c oxidase subunit 4 isoform 1 mitochondrial OS=Mus musculus OX=10090 GN=Cox4i1 PE=1 SV=2
294	389	Q7TSJ2|MAP6_MOUSE	117.77	6	6	2	8510000	5400000	5	5	5	2		96450	Microtubule-associated protein 6 OS=Mus musculus OX=10090 GN=Map6 PE=1 SV=2
339	370	P48722|HS74L_MOUSE	113.84	7	4	5	3860000	3780000	5	5	3	4		94382	Heat shock 70 kDa protein 4L OS=Mus musculus OX=10090 GN=Hspa4l PE=1 SV=2
264	400	Q8BYI9|TENR_MOUSE	111.09	4	3	4	7930000	9260000	5	5	4	5		149589	Tenascin-R OS=Mus musculus OX=10090 GN=Tnr PE=1 SV=2
180	324	Q8CAQ8|MIC60_MOUSE	110.72	7	7	6	4670000	5690000	5	5	6	5		83900	MICOS complex subunit Mic60 OS=Mus musculus OX=10090 GN=Immt PE=1 SV=1
263	382	P48036|ANXA5_MOUSE	108.44	14	12	14	4830000	21900000	5	5	4	5		35752	Annexin A5 OS=Mus musculus OX=10090 GN=Anxa5 PE=1 SV=1
340	374	tr|D3YXT0|D3YXT0_MOUSE	104.35	13	8	7	5210000	16500000	5	5	3	3	Carbamidomethylation	49573	NADH dehydrogenase [ubiquinone] iron-sulfur protein 2 mitochondrial OS=Mus musculus OX=10090 GN=Ndufs2 PE=1 SV=1
340	377	Q91WD5|NDUS2_MOUSE	104.35	12	7	7	5210000	16500000	5	5	3	3	Carbamidomethylation	52626	NADH dehydrogenase [ubiquinone] iron-sulfur protein 2 mitochondrial OS=Mus musculus OX=10090 GN=Ndufs2 PE=1 SV=1
297	408	Q921I1|TRFE_MOUSE	103.18	7	5	5	7620000	11800000	5	5	4	4	Carbamidomethylation	76724	Serotransferrin OS=Mus musculus OX=10090 GN=Tf PE=1 SV=1
99	319	Q61699|HS105_MOUSE	101.44	6	6	5	312000000	403000000	5	5	9	9	Deamidation N	96407	Heat shock protein 105 kDa OS=Mus musculus OX=10090 GN=Hsph1 PE=1 SV=2
293	367	Q9CQQ7|AT5F1_MOUSE	100.3	20	14	17	29800000	29100000	5	5	4	4		28949	ATP synthase F(0) complex subunit B1 mitochondrial OS=Mus musculus OX=10090 GN=Atp5pb PE=1 SV=1
296	407	Q9Z1G3|VATC1_MOUSE	97.83	11	8	9	12300000	13200000	5	5	4	4	Carbamidomethylation	43888	V-type proton ATPase subunit C 1 OS=Mus musculus OX=10090 GN=Atp6v1c1 PE=1 SV=4
266	411	Q8R081|HNRPL_MOUSE	95.99	12	11	10	1500000	1630000	5	5	4	4	Carbamidomethylation; Deamidation N	63964	Heterogeneous nuclear ribonucleoprotein L OS=Mus musculus OX=10090 GN=Hnrnpl PE=1 SV=2
266	412	tr|G5E924|G5E924_MOUSE	95.99	12	10	10	1500000	1630000	5	5	4	4	Carbamidomethylation; Deamidation N	66941	Heterogeneous nuclear ribonucleoprotein L (Fragment) OS=Mus musculus OX=10090 GN=Hnrnpl PE=1 SV=1
295	394	P09405|NUCL_MOUSE	94.63	8	4	5	1820000	3600000	5	5	3	3		76723	Nucleolin OS=Mus musculus OX=10090 GN=Ncl PE=1 SV=2
384	402	Q9EQH3|VPS35_MOUSE	88.66	8	7	2	2130000	1870000	5	5	4	2		91713	Vacuolar protein sorting-associated protein 35 OS=Mus musculus OX=10090 GN=Vps35 PE=1 SV=1
16	40	Q9ERD7|TBB3_MOUSE	268.22	43	36	43	32500000	45100000	23	4	35	38	Carbamidomethylation; Deamidation N; Oxidation (M); HexNac	50419	Tubulin beta-3 chain OS=Mus musculus OX=10090 GN=Tubb3 PE=1 SV=1
17	83	P02089|HBB2_MOUSE	204.74	76	71	67	149000000	112000000	14	4	30	40	Carbamidomethylation	15878	Hemoglobin subunit beta-2 OS=Mus musculus OX=10090 GN=Hbb-b2 PE=1 SV=2
112	97	tr|Q3UHH0|Q3UHH0_MOUSE	188.36	10	8	7	6280000	4670000	10	4	9	8	Carbamidomethylation; Deamidation N	132106	Calcium-transporting ATPase OS=Mus musculus OX=10090 GN=Atp2b2 PE=1 SV=1
112	98	Q9R0K7|AT2B2_MOUSE	188.36	10	8	7	6280000	4670000	10	4	9	8	Carbamidomethylation; Deamidation N	132587	Plasma membrane calcium-transporting ATPase 2 OS=Mus musculus OX=10090 GN=Atp2b2 PE=1 SV=2
112	99	tr|F8WHB1|F8WHB1_MOUSE	188.36	9	8	7	6280000	4670000	10	4	9	8	Carbamidomethylation; Deamidation N	136783	Calcium-transporting ATPase OS=Mus musculus OX=10090 GN=Atp2b2 PE=1 SV=1
52	81	P51881|ADT2_MOUSE	172.57	35	35	35	47200000	74000000	10	4	16	17	Carbamidomethylation	32931	ADP/ATP translocase 2 OS=Mus musculus OX=10090 GN=Slc25a5 PE=1 SV=3
145	162	tr|Q3TT92|Q3TT92_MOUSE	170.98	15	14	13	4210000	9460000	8	4	7	8	Carbamidomethylation	61780	Dihydropyrimidinase-related protein 3 OS=Mus musculus OX=10090 GN=Dpysl3 PE=1 SV=1
145	163	Q62188|DPYL3_MOUSE	170.98	15	14	13	4210000	9460000	8	4	7	8	Carbamidomethylation	61936	Dihydropyrimidinase-related protein 3 OS=Mus musculus OX=10090 GN=Dpysl3 PE=1 SV=1
145	165	tr|E9PWE8|E9PWE8_MOUSE	170.98	13	12	11	4210000	9460000	8	4	7	8	Carbamidomethylation	73884	Dihydropyrimidinase-related protein 3 OS=Mus musculus OX=10090 GN=Dpysl3 PE=1 SV=1
68	151	Q9CQV8|1433B_MOUSE	168.05	36	36	28	36400000	37800000	8	4	16	14	Deamidation N	28086	14-3-3 protein beta/alpha OS=Mus musculus OX=10090 GN=Ywhab PE=1 SV=3
82	155	P68510|1433F_MOUSE	161.08	32	32	32	27000000	35400000	8	4	12	14	Carbamidomethylation; Deamidation N	28212	14-3-3 protein eta OS=Mus musculus OX=10090 GN=Ywhah PE=1 SV=2
62	157	P61982|1433G_MOUSE	156.25	31	31	31	72700000	90400000	8	4	15	16	Carbamidomethylation; Deamidation N	28303	14-3-3 protein gamma OS=Mus musculus OX=10090 GN=Ywhag PE=1 SV=2
123	232	Q61598|GDIB_MOUSE	149.98	15	12	12	6290000	8110000	7	4	8	7	Carbamidomethylation	50537	Rab GDP dissociation inhibitor beta OS=Mus musculus OX=10090 GN=Gdi2 PE=1 SV=1
268	433	P70296|PEBP1_MOUSE	149.91	33	33	33	35900000	44600000	4	4	4	4	Deamidation N	20830	Phosphatidylethanolamine-binding protein 1 OS=Mus musculus OX=10090 GN=Pebp1 PE=1 SV=3
69	266	P62259|1433E_MOUSE	147.49	24	24	24	45200000	53700000	7	4	14	16	Carbamidomethylation; Deamidation N	29174	14-3-3 protein epsilon OS=Mus musculus OX=10090 GN=Ywhae PE=1 SV=1
265	401	P28663|SNAB_MOUSE	141.48	25	14	17	4990000	15100000	5	4	4	5	Carbamidomethylation; Deamidation N	33557	Beta-soluble NSF attachment protein OS=Mus musculus OX=10090 GN=Napb PE=1 SV=2
273	469	P62962|PROF1_MOUSE	138.03	37	37	37	8650000	10100000	4	4	5	4	Deamidation N	14957	Profilin-1 OS=Mus musculus OX=10090 GN=Pfn1 PE=1 SV=2
228	434	P08228|SODC_MOUSE	137.15	31	31	31	56200000	47400000	4	4	6	4	Carbamidomethylation	15943	Superoxide dismutase [Cu-Zn] OS=Mus musculus OX=10090 GN=Sod1 PE=1 SV=2
300	429	tr|A2ALV3|A2ALV3_MOUSE	136.47	13	9	9	9370000	12200000	4	4	4	3		48296	Endophilin-A1 OS=Mus musculus OX=10090 GN=Sh3gl2 PE=1 SV=1
387	504	tr|Q3TYE5|Q3TYE5_MOUSE	134.02	17	12	14	13600000	6050000	4	4	3	3	Carbamidomethylation; Deamidation N	37310	Limbic system-associated membrane protein OS=Mus musculus OX=10090 GN=Lsamp PE=1 SV=1
387	505	Q8BLK3|LSAMP_MOUSE	134.02	16	12	13	13600000	6050000	4	4	3	3	Carbamidomethylation; Deamidation N	38086	Limbic system-associated membrane protein OS=Mus musculus OX=10090 GN=Lsamp PE=1 SV=1
387	506	tr|A0A087WP80|A0A087WP80_MOUSE	134.02	16	12	13	13600000	6050000	4	4	3	3	Carbamidomethylation; Deamidation N	39358	Limbic system-associated membrane protein OS=Mus musculus OX=10090 GN=Lsamp PE=1 SV=1
160	196	tr|Q5SW88|Q5SW88_MOUSE	132.47	37	23	29	2190000	332000	8	4	6	8		22372	RAB1A member RAS oncogene family OS=Mus musculus OX=10090 GN=Rab1a PE=1 SV=1
160	197	P62821|RAB1A_MOUSE	132.47	37	23	29	2190000	332000	8	4	6	8		22678	Ras-related protein Rab-1A OS=Mus musculus OX=10090 GN=Rab1A PE=1 SV=3
229	496	tr|E9PV73|E9PV73_MOUSE	131.53	25	25	25	8400000	10600000	5	4	5	6	Carbamidomethylation	21820	Neuron-specific calcium-binding protein hippocalcin (Fragment) OS=Mus musculus OX=10090 GN=Hpca PE=1 SV=1
229	500	P84075|HPCA_MOUSE	131.53	24	24	24	8400000	10600000	5	4	5	6	Carbamidomethylation	22427	Neuron-specific calcium-binding protein hippocalcin OS=Mus musculus OX=10090 GN=Hpca PE=1 SV=2
373	1029	P26350|PTMA_MOUSE	124.36	23	23	14	2770000	2300000	4	4	4	3	Deamidation N	12254	Prothymosin alpha OS=Mus musculus OX=10090 GN=Ptma PE=1 SV=2
211	741	P62897|CYC_MOUSE	121.6	32	32	31	69900000	81300000	4	4	6	6		11605	Cytochrome c somatic OS=Mus musculus OX=10090 GN=Cycs PE=1 SV=2
165	219	tr|Z4YJV4|Z4YJV4_MOUSE	120.87	6	6	6	3800000	4480000	7	4	7	7	Carbamidomethylation	116027	2-oxoglutarate dehydrogenase mitochondrial OS=Mus musculus OX=10090 GN=Ogdh PE=1 SV=1
165	220	Q60597|ODO1_MOUSE	120.87	6	6	6	3800000	4480000	7	4	7	7	Carbamidomethylation	116449	2-oxoglutarate dehydrogenase mitochondrial OS=Mus musculus OX=10090 GN=Ogdh PE=1 SV=3
386	490	tr|E9Q7S0|E9Q7S0_MOUSE	120.11	4	3	3	2950000	3900000	4	4	3	3	Carbamidomethylation	144595	Synaptojanin-1 OS=Mus musculus OX=10090 GN=Synj1 PE=1 SV=1
386	491	tr|F7BQW7|F7BQW7_MOUSE	120.11	4	3	3	2950000	3900000	4	4	3	3	Carbamidomethylation	146509	Synaptojanin-1 (Fragment) OS=Mus musculus OX=10090 GN=Synj1 PE=1 SV=1
386	492	Q8CHC4|SYNJ1_MOUSE	120.11	3	2	2	2950000	3900000	4	4	3	3	Carbamidomethylation	172616	Synaptojanin-1 OS=Mus musculus OX=10090 GN=Synj1 PE=1 SV=3
386	493	tr|D3Z656|D3Z656_MOUSE	120.11	3	2	2	2950000	3900000	4	4	3	3	Carbamidomethylation	176331	Synaptojanin-1 OS=Mus musculus OX=10090 GN=Synj1 PE=1 SV=1
306	479	tr|A0A0N4SVQ1|A0A0N4SVQ1_MOUSE	118.94	80	63	80	7930000	38400000	4	4	3	5		5877	Cytochrome c oxidase subunit NDUFA4 OS=Mus musculus OX=10090 GN=Ndufa4 PE=1 SV=1
306	485	Q62425|NDUA4_MOUSE	118.94	48	38	48	7930000	38400000	4	4	3	5		9327	Cytochrome c oxidase subunit NDUFA4 OS=Mus musculus OX=10090 GN=Ndufa4 PE=1 SV=2
345	513	tr|A2AFW6|A2AFW6_MOUSE	117.07	15	11	15	6650000	7170000	4	4	3	4	Carbamidomethylation	32345	Mitochondrial carrier homolog 2 OS=Mus musculus OX=10090 GN=Mtch2 PE=1 SV=1
345	515	Q791V5|MTCH2_MOUSE	117.07	15	11	15	6650000	7170000	4	4	3	4	Carbamidomethylation	33499	Mitochondrial carrier homolog 2 OS=Mus musculus OX=10090 GN=Mtch2 PE=1 SV=1
345	516	tr|Q9D050|Q9D050_MOUSE	117.07	14	10	14	6650000	7170000	4	4	3	4	Carbamidomethylation	34554	Mitochondrial carrier homolog 2 OS=Mus musculus OX=10090 GN=Mtch2 PE=1 SV=1
341	428	Q8BWF0|SSDH_MOUSE	116.42	10	8	8	3010000	1650000	4	4	3	3	Carbamidomethylation	55968	Succinate-semialdehyde dehydrogenase mitochondrial OS=Mus musculus OX=10090 GN=Aldh5a1 PE=1 SV=1
272	459	Q99JY9|ARP3_MOUSE	116.27	13	13	13	3100000	4010000	4	4	4	4	Carbamidomethylation; Deamidation N	47357	Actin-related protein 3 OS=Mus musculus OX=10090 GN=Actr3 PE=1 SV=3
305	476	Q61885|MOG_MOUSE	115.73	17	17	17	22900000	26000000	4	4	4	4	Carbamidomethylation	28271	Myelin-oligodendrocyte glycoprotein OS=Mus musculus OX=10090 GN=Mog PE=1 SV=1
305	477	tr|Q3UY21|Q3UY21_MOUSE	115.73	17	17	17	22900000	26000000	4	4	4	4	Carbamidomethylation	28374	Myelin-oligodendrocyte glycoprotein OS=Mus musculus OX=10090 GN=Mog PE=1 SV=1
307	503	Q9QXV0|PCSK1_MOUSE	114.55	22	22	18	3920000	2180000	4	4	4	3		27270	ProSAAS OS=Mus musculus OX=10090 GN=Pcsk1n PE=1 SV=2
346	517	tr|A0A0A6YW67|A0A0A6YW67_MOUSE	113.33	56	35	44	9010000	5110000	4	4	3	4		8728	MCG23377 isoform CRA_b OS=Mus musculus OX=10090 GN=Gm8797 PE=4 SV=1
346	518	tr|E9Q9J0|E9Q9J0_MOUSE	113.33	45	28	35	9010000	5110000	4	4	3	4		10914	Ubiquitin-60S ribosomal protein L40 (Fragment) OS=Mus musculus OX=10090 GN=Uba52 PE=4 SV=1
346	519	P62984|RL40_MOUSE	113.33	34	21	27	9010000	5110000	4	4	3	4		14728	Ubiquitin-60S ribosomal protein L40 OS=Mus musculus OX=10090 GN=Uba52 PE=1 SV=2
346	521	P62983|RS27A_MOUSE	113.33	28	17	22	9010000	5110000	4	4	3	4		17951	Ubiquitin-40S ribosomal protein S27a OS=Mus musculus OX=10090 GN=Rps27a PE=1 SV=2
346	522	tr|E9Q4P0|E9Q4P0_MOUSE	113.33	22	14	18	9010000	5110000	4	4	3	4		22234	KxDL motif-containing protein 1 (Fragment) OS=Mus musculus OX=10090 GN=Kxd1 PE=1 SV=1
346	523	tr|E9Q5F6|E9Q5F6_MOUSE	113.33	21	13	17	9010000	5110000	4	4	3	4		22592	Polyubiquitin-C (Fragment) OS=Mus musculus OX=10090 GN=Ubc PE=1 SV=1
346	524	tr|E9QNP0|E9QNP0_MOUSE	113.33	19	12	15	9010000	5110000	4	4	3	4		26856	KxDL motif-containing protein 1 OS=Mus musculus OX=10090 GN=Kxd1 PE=1 SV=1
346	525	tr|Q5SX22|Q5SX22_MOUSE	113.33	18	11	14	9010000	5110000	4	4	3	4		26620	Polyubiquitin-B (Fragment) OS=Mus musculus OX=10090 GN=Ubb PE=4 SV=2
346	527	P0CG49|UBB_MOUSE	113.33	14	9	11	9010000	5110000	4	4	3	4		34369	Polyubiquitin-B OS=Mus musculus OX=10090 GN=Ubb PE=2 SV=1
346	530	P0CG50|UBC_MOUSE	113.33	6	4	5	9010000	5110000	4	4	3	4		82550	Polyubiquitin-C OS=Mus musculus OX=10090 GN=Ubc PE=1 SV=2
385	436	Q9CPV4|GLOD4_MOUSE	112.34	15	12	6	1750000	1230000	4	4	3	2	Carbamidomethylation	33317	Glyoxalase domain-containing protein 4 OS=Mus musculus OX=10090 GN=Glod4 PE=1 SV=1
446	531	Q9JII6|AK1A1_MOUSE	110.29	14	6	11	4240000	5570000	4	4	2	3		36587	Aldo-keto reductase family 1 member A1 OS=Mus musculus OX=10090 GN=Akr1a1 PE=1 SV=3
393	581	Q8VEK3|HNRPU_MOUSE	109.87	5	4	3	306000	2280000	4	4	3	3	Carbamidomethylation	87918	Heterogeneous nuclear ribonucleoprotein U OS=Mus musculus OX=10090 GN=Hnrnpu PE=1 SV=1
262	375	tr|E0CXN5|E0CXN5_MOUSE	107.77	15	12	15	3160000	3390000	5	4	4	5	Carbamidomethylation	35231	Glycerol-3-phosphate dehydrogenase [NAD(+)] OS=Mus musculus OX=10090 GN=Gpd1 PE=1 SV=1
262	378	P13707|GPDA_MOUSE	107.77	14	11	14	3160000	3390000	5	4	4	5	Carbamidomethylation	37573	Glycerol-3-phosphate dehydrogenase [NAD(+)] cytoplasmic OS=Mus musculus OX=10090 GN=Gpd1 PE=1 SV=3
269	454	tr|A2AQR0|A2AQR0_MOUSE	105.83	6	2	6	1160000	2590000	4	4	3	5		82830	Glycerol-3-phosphate dehydrogenase OS=Mus musculus OX=10090 GN=Gpd2 PE=1 SV=1
353	603	P62715|PP2AB_MOUSE	105.8	13	13	6	4040000	5000000	4	4	4	2	Carbamidomethylation	35575	Serine/threonine-protein phosphatase 2A catalytic subunit beta isoform OS=Mus musculus OX=10090 GN=Ppp2cb PE=1 SV=1
344	495	O88844|IDHC_MOUSE	105.2	11	9	11	5120000	5730000	4	4	3	4		46674	Isocitrate dehydrogenase [NADP] cytoplasmic OS=Mus musculus OX=10090 GN=Idh1 PE=1 SV=2
325	838	tr|A0A0G2JGJ1|A0A0G2JGJ1_MOUSE	103.37	15	11	15	8330000	13300000	4	4	3	5	Carbamidomethylation	22347	Dihydropteridine reductase OS=Mus musculus OX=10090 GN=Qdpr PE=1 SV=1
325	839	Q8BVI4|DHPR_MOUSE	103.37	13	10	13	8330000	13300000	4	4	3	5	Carbamidomethylation	25570	Dihydropteridine reductase OS=Mus musculus OX=10090 GN=Qdpr PE=1 SV=2
457	746	tr|D6RFB9|D6RFB9_MOUSE	103.18	13	9	9	3280000	4460000	4	4	2	3		29485	Syntaxin-1A OS=Mus musculus OX=10090 GN=Stx1a PE=1 SV=1
457	747	O35526|STX1A_MOUSE	103.18	11	8	8	3280000	4460000	4	4	2	3		33054	Syntaxin-1A OS=Mus musculus OX=10090 GN=Stx1a PE=1 SV=3
302	444	tr|H3BL49|H3BL49_MOUSE	103.18	10	7	7	3520000	2870000	4	4	3	3		53083	T-complex protein 1 subunit theta OS=Mus musculus OX=10090 GN=Cct8 PE=1 SV=1
302	445	P42932|TCPQ_MOUSE	103.18	9	7	6	3520000	2870000	4	4	3	3		59556	T-complex protein 1 subunit theta OS=Mus musculus OX=10090 GN=Cct8 PE=1 SV=3
301	430	P60487|PLPP_MOUSE	100.78	15	11	15	3180000	4580000	4	4	3	4	Carbamidomethylation	31512	Pyridoxal phosphate phosphatase OS=Mus musculus OX=10090 GN=Pdxp PE=1 SV=1
248	612	P35486|ODPA_MOUSE	99.71	10	6	10	7870000	11300000	4	4	4	5		43232	Pyruvate dehydrogenase E1 component subunit alpha somatic form mitochondrial OS=Mus musculus OX=10090 GN=Pdha1 PE=1 SV=1
230	532	Q9D051|ODPB_MOUSE	98.26	10	10	10	20900000	21600000	4	4	4	5	Carbamidomethylation	38937	Pyruvate dehydrogenase E1 component subunit beta mitochondrial OS=Mus musculus OX=10090 GN=Pdhb PE=1 SV=1
298	414	tr|E9PUD2|E9PUD2_MOUSE	98.05	6	6	3	3190000	2980000	4	4	4	2		79533	Dynamin-1-like protein OS=Mus musculus OX=10090 GN=Dnm1l PE=1 SV=1
298	415	Q8K1M6|DNM1L_MOUSE	98.05	6	6	3	3190000	2980000	4	4	4	2		82658	Dynamin-1-like protein OS=Mus musculus OX=10090 GN=Dnm1l PE=1 SV=2
394	595	tr|A0A1D5RM85|A0A1D5RM85_MOUSE	96.44	18	4	18	153000	1860000	4	4	1	4	Carbamidomethylation	24638	60S ribosomal protein L18a (Fragment) OS=Mus musculus OX=10090 GN=Rpl18a PE=1 SV=1
354	608	tr|D3YWF6|D3YWF6_MOUSE	94.61	19	15	13	5830000	7730000	4	4	3	3		28037	Ubiquitin thioesterase OTUB1 OS=Mus musculus OX=10090 GN=Otub1 PE=1 SV=1
354	609	Q7TQI3|OTUB1_MOUSE	94.61	17	13	11	5830000	7730000	4	4	3	3		31270	Ubiquitin thioesterase OTUB1 OS=Mus musculus OX=10090 GN=Otub1 PE=1 SV=2
310	549	tr|Q8BTU6|Q8BTU6_MOUSE	92.87	11	11	11	6910000	7950000	4	4	4	4		41290	Eukaryotic initiation factor 4A-II OS=Mus musculus OX=10090 GN=Eif4a2 PE=1 SV=1
310	553	P10630|IF4A2_MOUSE	92.87	10	10	10	6910000	7950000	4	4	4	4		46402	Eukaryotic initiation factor 4A-II OS=Mus musculus OX=10090 GN=Eif4a2 PE=1 SV=2
391	569	tr|B1AXW5|B1AXW5_MOUSE	92.02	21	12	21	7350000	13600000	4	4	2	4		18870	Peroxiredoxin-1 (Fragment) OS=Mus musculus OX=10090 GN=Prdx1 PE=1 SV=8
391	570	tr|B1AXW6|B1AXW6_MOUSE	92.02	20	11	20	7350000	13600000	4	4	2	4		19483	Peroxiredoxin-1 (Fragment) OS=Mus musculus OX=10090 GN=Prdx1 PE=1 SV=1
391	573	P35700|PRDX1_MOUSE	92.02	18	10	18	7350000	13600000	4	4	2	4		22176	Peroxiredoxin-1 OS=Mus musculus OX=10090 GN=Prdx1 PE=1 SV=1
278	563	P50518|VATE1_MOUSE	91.82	18	15	18	13000000	15200000	4	4	4	5		26157	V-type proton ATPase subunit E 1 OS=Mus musculus OX=10090 GN=Atp6v1e1 PE=1 SV=2
349	582	Q9D2G2|ODO2_MOUSE	89.36	9	7	9	17300000	24000000	4	4	3	4		48995	Dihydrolipoyllysine-residue succinyltransferase component of 2-oxoglutarate dehydrogenase complex mitochondrial OS=Mus musculus OX=10090 GN=Dlst PE=1 SV=1
395	610	Q99LC5|ETFA_MOUSE	89.18	13	9	11	1980000	2380000	4	4	3	3	Carbamidomethylation	35009	Electron transfer flavoprotein subunit alpha mitochondrial OS=Mus musculus OX=10090 GN=Etfa PE=1 SV=2
271	456	P58252|EF2_MOUSE	87.89	5	5	5	7690000	7180000	4	4	4	4		95314	Elongation factor 2 OS=Mus musculus OX=10090 GN=Eef2 PE=1 SV=2
388	546	P14148|RL7_MOUSE	87.36	15	11	12	3090000	1380000	4	4	3	3		31420	60S ribosomal protein L7 OS=Mus musculus OX=10090 GN=Rpl7 PE=1 SV=2
388	547	tr|F6XI62|F6XI62_MOUSE	87.36	14	10	11	3090000	1380000	4	4	3	3		32536	60S ribosomal protein L7 (Fragment) OS=Mus musculus OX=10090 GN=Rpl7 PE=1 SV=1
318	780	tr|B1AWE0|B1AWE0_MOUSE	74.12	12	12	12	4240000	6190000	4	4	4	4		23479	Clathrin light chain OS=Mus musculus OX=10090 GN=Clta PE=1 SV=1
318	781	tr|Q6PFA2|Q6PFA2_MOUSE	74.12	12	12	12	4240000	6190000	4	4	4	4		23633	Clathrin light chain OS=Mus musculus OX=10090 GN=Clta PE=1 SV=1
318	782	tr|B1AWE1|B1AWE1_MOUSE	74.12	12	12	12	4240000	6190000	4	4	4	4		24964	Clathrin light chain OS=Mus musculus OX=10090 GN=Clta PE=1 SV=1
318	783	O08585|CLCA_MOUSE	74.12	11	11	11	4240000	6190000	4	4	4	4		25604	Clathrin light chain A OS=Mus musculus OX=10090 GN=Clta PE=1 SV=2
318	784	tr|B1AWD8|B1AWD8_MOUSE	74.12	11	11	11	4240000	6190000	4	4	4	4		25661	Clathrin light chain OS=Mus musculus OX=10090 GN=Clta PE=1 SV=1
318	785	tr|B1AWD9|B1AWD9_MOUSE	74.12	11	11	11	4240000	6190000	4	4	4	4		27062	Clathrin light chain OS=Mus musculus OX=10090 GN=Clta PE=1 SV=1
9	32	P68368|TBA4A_MOUSE	246.95	43	40	41	66900000	67000000	20	3	49	51	Carbamidomethylation; Deamidation N	49924	Tubulin alpha-4A chain OS=Mus musculus OX=10090 GN=Tuba4a PE=1 SV=1
9	33	tr|A0A0A0MQA5|A0A0A0MQA5_MOUSE	246.95	40	38	38	66900000	67000000	20	3	49	51	Carbamidomethylation; Deamidation N	52912	Tubulin alpha chain (Fragment) OS=Mus musculus OX=10090 GN=Tuba4a PE=1 SV=1
25	70	P60710|ACTB_MOUSE	205.6	36	36	35	457000000	518000000	15	3	33	31	Oxidation (M); HLys-Hex	41737	Actin cytoplasmic 1 OS=Mus musculus OX=10090 GN=Actb PE=1 SV=1
25	69	P63260|ACTG_MOUSE	205.6	36	36	35	457000000	518000000	15	3	33	31	Oxidation (M); HLys-Hex	41793	Actin cytoplasmic 2 OS=Mus musculus OX=10090 GN=Actg1 PE=1 SV=1
132	269	P62880|GBB2_MOUSE	177.12	23	23	19	13900000	17700000	6	3	9	8	Carbamidomethylation	37331	Guanine nucleotide-binding protein G(I)/G(S)/G(T) subunit beta-2 OS=Mus musculus OX=10090 GN=Gnb2 PE=1 SV=3
132	270	tr|E9QKR0|E9QKR0_MOUSE	177.12	20	20	17	13900000	17700000	6	3	9	8	Carbamidomethylation	41409	Guanine nucleotide-binding protein G(I)/G(S)/G(T) subunit beta-2 OS=Mus musculus OX=10090 GN=Gnb2 PE=1 SV=1
96	129	P10126|EF1A1_MOUSE	162.45	23	23	16	21900000	24300000	10	3	11	11	Carbamidomethylation	50114	Elongation factor 1-alpha 1 OS=Mus musculus OX=10090 GN=Eef1a1 PE=1 SV=3
124	247	tr|H3BKR2|H3BKR2_MOUSE	161.52	28	21	28	31600000	38700000	6	3	9	9	Carbamidomethylation; Deamidation N	30199	Guanine nucleotide-binding protein G(I)/G(S)/G(T) subunit beta-1 (Fragment) OS=Mus musculus OX=10090 GN=Gnb1 PE=1 SV=8
124	248	P62874|GBB1_MOUSE	161.52	23	17	23	31600000	38700000	6	3	9	9	Carbamidomethylation; Deamidation N	37377	Guanine nucleotide-binding protein G(I)/G(S)/G(T) subunit beta-1 OS=Mus musculus OX=10090 GN=Gnb1 PE=1 SV=3
130	233	P61027|RAB10_MOUSE	139.02	31	31	31	4640000	2270000	6	3	8	8		22541	Ras-related protein Rab-10 OS=Mus musculus OX=10090 GN=Rab10 PE=1 SV=1
173	657	Q9JKC6|CEND_MOUSE	131.36	41	41	19	9360000	10000000	3	3	5	4	Deamidation N	14987	Cell cycle exit and neuronal differentiation protein 1 OS=Mus musculus OX=10090 GN=Cend1 PE=1 SV=1
304	475	P53994|RAB2A_MOUSE	131.3	24	18	24	3250000	9120000	4	3	3	4		23548	Ras-related protein Rab-2A OS=Mus musculus OX=10090 GN=Rab2a PE=1 SV=1
316	660	Q9DBJ1|PGAM1_MOUSE	131.29	16	9	16	8340000	15100000	3	3	2	5	Carbamidomethylation	28832	Phosphoglycerate mutase 1 OS=Mus musculus OX=10090 GN=Pgam1 PE=1 SV=3
342	442	Q7TQF7|AMPH_MOUSE	125.12	7	6	5	3630000	9980000	4	3	3	3	Deamidation N	75013	Amphiphysin OS=Mus musculus OX=10090 GN=Amph PE=1 SV=1
342	443	tr|A0A0G2JEG8|A0A0G2JEG8_MOUSE	125.12	7	6	5	3630000	9980000	4	3	3	3	Deamidation N	75340	Amphiphysin OS=Mus musculus OX=10090 GN=Amph PE=1 SV=1
409	821	P09671|SODM_MOUSE	122.23	17	17	17	5150000	7590000	3	3	3	3		24603	Superoxide dismutase [Mn] mitochondrial OS=Mus musculus OX=10090 GN=Sod2 PE=1 SV=3
261	373	P84078|ARF1_MOUSE	118.48	28	23	22	5090000	12600000	5	3	5	4		20697	ADP-ribosylation factor 1 OS=Mus musculus OX=10090 GN=Arf1 PE=1 SV=2
261	372	P61205|ARF3_MOUSE	118.48	28	23	22	5090000	12600000	5	3	5	4		20601	ADP-ribosylation factor 3 OS=Mus musculus OX=10090 GN=Arf3 PE=2 SV=2
283	662	Q91V12|BACH_MOUSE	116.46	10	10	10	8180000	9660000	3	3	4	5		42537	Cytosolic acyl coenzyme A thioester hydrolase OS=Mus musculus OX=10090 GN=Acot7 PE=1 SV=2
283	663	tr|E9PYH2|E9PYH2_MOUSE	116.46	10	10	10	8180000	9660000	3	3	4	5		42826	Cytosolic acyl coenzyme A thioester hydrolase OS=Mus musculus OX=10090 GN=Acot7 PE=1 SV=1
557	804	P31648|SC6A1_MOUSE	116.28	7	5	3	6990000	4700000	3	3	2	2	Carbamidomethylation	67002	Sodium- and chloride-dependent GABA transporter 1 OS=Mus musculus OX=10090 GN=Slc6a1 PE=1 SV=2
141	577	O88569|ROA2_MOUSE	115.79	12	12	12	6650000	5300000	4	3	7	7	Deamidation N	37403	Heterogeneous nuclear ribonucleoproteins A2/B1 OS=Mus musculus OX=10090 GN=Hnrnpa2b1 PE=1 SV=2
398	645	Q8K596|NAC2_MOUSE	113.43	4	4	3	1390000	1110000	3	3	3	2		100711	Sodium/calcium exchanger 2 OS=Mus musculus OX=10090 GN=Slc8a2 PE=1 SV=1
467	800	tr|D3YUK4|D3YUK4_MOUSE	113.06	25	25	20	1530000	397000	3	3	3	2	Carbamidomethylation; Deamidation N	17740	NADH dehydrogenase [ubiquinone] 1 beta subcomplex subunit 10 (Fragment) OS=Mus musculus OX=10090 GN=Ndufb10 PE=1 SV=1
467	803	Q9DCS9|NDUBA_MOUSE	113.06	21	21	17	1530000	397000	3	3	3	2	Carbamidomethylation; Deamidation N	21024	NADH dehydrogenase [ubiquinone] 1 beta subcomplex subunit 10 OS=Mus musculus OX=10090 GN=Ndufb10 PE=1 SV=3
553	755	P14231|AT1B2_MOUSE	112.99	11	6	7	21400000	16100000	3	3	2	2	Carbamidomethylation; Deamidation N	33344	Sodium/potassium-transporting ATPase subunit beta-2 OS=Mus musculus OX=10090 GN=Atp1b2 PE=1 SV=2
225	350	P60766|CDC42_MOUSE	111.42	27	27	27	5510000	6930000	5	3	5	6	Carbamidomethylation	21259	Cell division control protein 42 homolog OS=Mus musculus OX=10090 GN=Cdc42 PE=1 SV=2
452	658	P56391|CX6B1_MOUSE	110.54	42	26	42	7980000	8520000	3	3	2	3	Carbamidomethylation	10071	Cytochrome c oxidase subunit 6B1 OS=Mus musculus OX=10090 GN=Cox6b1 PE=1 SV=2
550	719	tr|A0A0R3P9C8|A0A0R3P9C8_MOUSE	109.8	12	8	7	3160000	2930000	3	3	2	2		42122	NADH dehydrogenase [ubiquinone] 1 alpha subcomplex subunit 9 mitochondrial OS=Mus musculus OX=10090 GN=Ndufa9 PE=1 SV=1
550	720	Q9DC69|NDUA9_MOUSE	109.8	12	8	7	3160000	2930000	3	3	2	2		42525	NADH dehydrogenase [ubiquinone] 1 alpha subcomplex subunit 9 mitochondrial OS=Mus musculus OX=10090 GN=Ndufa9 PE=1 SV=2
362	666	E9PUL5|PRRT2_MOUSE	107.78	10	10	10	2590000	3190000	3	3	3	4		35924	Proline-rich transmembrane protein 2 OS=Mus musculus OX=10090 GN=Prrt2 PE=1 SV=1
260	362	P03995|GFAP_MOUSE	107.06	11	8	8	4540000	2920000	5	3	4	4		49900	Glial fibrillary acidic protein OS=Mus musculus OX=10090 GN=Gfap PE=1 SV=4
356	629	Q9JJV2|PROF2_MOUSE	105.99	25	25	25	7780000	9150000	3	3	3	3	Deamidation N	15032	Profilin-2 OS=Mus musculus OX=10090 GN=Pfn2 PE=1 SV=3
291	325	P80315|TCPD_MOUSE	105.35	11	1	11	1370000	2610000	5	3	1	5	Carbamidomethylation	58066	T-complex protein 1 subunit delta OS=Mus musculus OX=10090 GN=Cct4 PE=1 SV=3
198	286	tr|B2RXT3|B2RXT3_MOUSE	105.04	6	6	4	1800000	1570000	6	3	6	5		114561	Ogdhl protein OS=Mus musculus OX=10090 GN=Ogdhl PE=1 SV=1
198	287	tr|E9Q7L0|E9Q7L0_MOUSE	105.04	6	6	4	1800000	1570000	6	3	6	5		116600	Oxoglutarate dehydrogenase-like OS=Mus musculus OX=10090 GN=Ogdhl PE=1 SV=1
275	501	tr|Q8CCS7|Q8CCS7_MOUSE	105	17	17	17	3850000	4860000	4	3	5	4		28123	Calbindin 2 isoform CRA_a OS=Mus musculus OX=10090 GN=Calb2 PE=1 SV=1
275	502	Q08331|CALB2_MOUSE	105	15	15	15	3850000	4860000	4	3	5	4		31373	Calretinin OS=Mus musculus OX=10090 GN=Calb2 PE=1 SV=3
447	565	Q61753|SERA_MOUSE	103.28	9	6	5	136000	695000	4	3	3	2	Carbamidomethylation	56586	D-3-phosphoglycerate dehydrogenase OS=Mus musculus OX=10090 GN=Phgdh PE=1 SV=3
454	688	Q60864|STIP1_MOUSE	103.09	7	7	5	5740000	2780000	3	3	3	2		62582	Stress-induced-phosphoprotein 1 OS=Mus musculus OX=10090 GN=Stip1 PE=1 SV=1
401	693	P70404|IDHG1_MOUSE	103.03	12	12	12	3060000	2150000	3	3	3	3	Carbamidomethylation; Deamidation N	42785	Isocitrate dehydrogenase [NAD] subunit gamma 1 mitochondrial OS=Mus musculus OX=10090 GN=Idh3g PE=1 SV=1
476	859	Q9WTX5|SKP1_MOUSE	101.71	24	15	16	1970000	1920000	3	3	2	2		18672	S-phase kinase-associated protein 1 OS=Mus musculus OX=10090 GN=Skp1 PE=1 SV=3
464	775	tr|Q3ZB60|Q3ZB60_MOUSE	101.15	6	6	3	13000000	9940000	3	3	3	2		62587	Mag protein (Fragment) OS=Mus musculus OX=10090 GN=Mag PE=1 SV=1
464	777	P20917|MAG_MOUSE	101.15	6	6	3	13000000	9940000	3	3	3	2		69260	Myelin-associated glycoprotein OS=Mus musculus OX=10090 GN=Mag PE=1 SV=2
464	778	tr|A0A087WPR1|A0A087WPR1_MOUSE	101.15	6	6	3	13000000	9940000	3	3	3	2		69388	Myelin-associated glycoprotein OS=Mus musculus OX=10090 GN=Mag PE=1 SV=1
281	613	P19157|GSTP1_MOUSE	100.75	14	14	14	13100000	17100000	3	3	3	3		23609	Glutathione S-transferase P 1 OS=Mus musculus OX=10090 GN=Gstp1 PE=1 SV=2
404	711	Q9QYG0|NDRG2_MOUSE	100.69	9	9	9	15700000	15500000	3	3	3	3	Carbamidomethylation	40789	Protein NDRG2 OS=Mus musculus OX=10090 GN=Ndrg2 PE=1 SV=1
485	889	Q8R191|SNG3_MOUSE	100.51	17	17	12	13200000	12400000	3	3	3	2	Carbamidomethylation; Deamidation N	24561	Synaptogyrin-3 OS=Mus musculus OX=10090 GN=Syngr3 PE=1 SV=1
417	919	Q80TL4|PHF24_MOUSE	100.17	9	6	9	1180000	485000	3	3	2	4	Carbamidomethylation	45223	PHD finger protein 24 OS=Mus musculus OX=10090 GN=Phf24 PE=1 SV=2
397	632	Q91V92|ACLY_MOUSE	99.77	3	2	3	399000	2250000	3	3	2	3	Carbamidomethylation	119728	ATP-citrate synthase OS=Mus musculus OX=10090 GN=Acly PE=1 SV=1
397	633	tr|Q3V117|Q3V117_MOUSE	99.77	3	2	3	399000	2250000	3	3	2	3	Carbamidomethylation	120795	ATP-citrate synthase OS=Mus musculus OX=10090 GN=Acly PE=1 SV=1
314	628	Q99LC3|NDUAA_MOUSE	99.75	10	10	6	1870000	2350000	3	3	3	2	Carbamidomethylation	40603	NADH dehydrogenase [ubiquinone] 1 alpha subcomplex subunit 10 mitochondrial OS=Mus musculus OX=10090 GN=Ndufa10 PE=1 SV=1
210	691	Q60931|VDAC3_MOUSE	99.67	12	12	12	10400000	11600000	4	3	6	6		30753	Voltage-dependent anion-selective channel protein 3 OS=Mus musculus OX=10090 GN=Vdac3 PE=1 SV=1
210	692	tr|J3QMG3|J3QMG3_MOUSE	99.67	12	12	12	10400000	11600000	4	3	6	6		30852	Voltage-dependent anion-selective channel protein 3 OS=Mus musculus OX=10090 GN=Vdac3 PE=1 SV=1
390	567	P46638|RB11B_MOUSE	99.53	19	15	14	6060000	2830000	4	3	3	3		24489	Ras-related protein Rab-11B OS=Mus musculus OX=10090 GN=Rab11b PE=1 SV=3
232	621	O88737|BSN_MOUSE	97.81	1	1	1	147000	253000	3	3	2	3		418848	Protein bassoon OS=Mus musculus OX=10090 GN=Bsn PE=1 SV=4
366	761	Q60829|PPR1B_MOUSE	97.33	22	22	14	3040000	567000	3	3	3	2		21781	Protein phosphatase 1 regulatory subunit 1B OS=Mus musculus OX=10090 GN=Ppp1r1b PE=1 SV=2
400	686	P62702|RS4X_MOUSE	97.27	11	11	11	6190000	7650000	3	3	3	3	Carbamidomethylation	29598	40S ribosomal protein S4 X isoform OS=Mus musculus OX=10090 GN=Rps4x PE=1 SV=2
361	649	tr|D3Z4T6|D3Z4T6_MOUSE	97.22	9	6	9	2970000	4940000	3	3	2	3		36208	Neuronal growth regulator 1 OS=Mus musculus OX=10090 GN=Negr1 PE=1 SV=1
361	648	tr|A0A4W9|A0A4W9_MOUSE	97.22	9	6	9	2970000	4940000	3	3	2	3		36118	Neuronal growth regulator 1 OS=Mus musculus OX=10090 GN=Negr1 PE=1 SV=1
361	650	Q80Z24|NEGR1_MOUSE	97.22	9	6	9	2970000	4940000	3	3	2	3		37900	Neuronal growth regulator 1 OS=Mus musculus OX=10090 GN=Negr1 PE=1 SV=1
403	712	O35129|PHB2_MOUSE	97.1	11	11	11	4730000	6500000	3	3	3	3		33296	Prohibitin-2 OS=Mus musculus OX=10090 GN=Phb2 PE=1 SV=1
389	566	P80318|TCPG_MOUSE	96.9	7	6	5	2040000	2230000	4	3	3	3		60630	T-complex protein 1 subunit gamma OS=Mus musculus OX=10090 GN=Cct3 PE=1 SV=1
461	765	tr|A0A1B0GSS8|A0A1B0GSS8_MOUSE	96.53	21	14	21	17100000	17100000	3	3	2	3		17958	60S ribosomal protein L18 OS=Mus musculus OX=10090 GN=Rpl18 PE=1 SV=1
461	766	tr|A0A1B0GQU8|A0A1B0GQU8_MOUSE	96.53	21	14	21	17100000	17100000	3	3	2	3		18101	60S ribosomal protein L18 OS=Mus musculus OX=10090 GN=Rpl18 PE=1 SV=1
461	767	P35980|RL18_MOUSE	96.53	18	12	18	17100000	17100000	3	3	2	3		21645	60S ribosomal protein L18 OS=Mus musculus OX=10090 GN=Rpl18 PE=1 SV=3
420	991	Q99P72|RTN4_MOUSE	96.17	2	1	2	1670000	20500000	3	3	2	3		126613	Reticulon-4 OS=Mus musculus OX=10090 GN=Rtn4 PE=1 SV=2
309	548	P63085|MK01_MOUSE	95.93	12	12	9	7910000	6110000	4	3	4	3	Carbamidomethylation	41276	Mitogen-activated protein kinase 1 OS=Mus musculus OX=10090 GN=Mapk1 PE=1 SV=3
559	820	D3Z7P3|GLSK_MOUSE	95.79	5	5	1	3670000	2660000	3	3	3	1	Carbamidomethylation	73964	Glutaminase kidney isoform mitochondrial OS=Mus musculus OX=10090 GN=Gls PE=1 SV=1
357	630	Q9DCJ5|NDUA8_MOUSE	95.73	22	22	22	3860000	2630000	3	3	3	3	Carbamidomethylation; Deamidation N	19992	NADH dehydrogenase [ubiquinone] 1 alpha subcomplex subunit 8 OS=Mus musculus OX=10090 GN=Ndufa8 PE=1 SV=3
246	550	tr|A0A0R4J2C2|A0A0R4J2C2_MOUSE	95.54	9	9	6	3840000	2180000	5	3	5	4		47249	Synaptotagmin II OS=Mus musculus OX=10090 GN=Syt2 PE=1 SV=1
320	807	tr|B2RXS8|B2RXS8_MOUSE	94.62	2	2	2	7060000	25100000	3	3	2	3		164357	Ptprz1 protein OS=Mus musculus OX=10090 GN=Ptprz1 PE=1 SV=1
320	809	tr|A0A0J9YVD2|A0A0J9YVD2_MOUSE	94.62	2	2	2	7060000	25100000	3	3	2	3		174988	Receptor-type tyrosine-protein phosphatase zeta OS=Mus musculus OX=10090 GN=Ptprz1 PE=1 SV=1
320	812	B9EKR1|PTPRZ_MOUSE	94.62	2	1	2	7060000	25100000	3	3	2	3		254403	Receptor-type tyrosine-protein phosphatase zeta OS=Mus musculus OX=10090 GN=Ptprz1 PE=1 SV=1
270	455	tr|A0A2R8W6V9|A0A2R8W6V9_MOUSE	94.41	11	11	11	5160000	6600000	4	3	4	4		39159	Neuronal-specific septin-3 OS=Mus musculus OX=10090 GN=Sept3 PE=1 SV=1
470	833	P21279|GNAQ_MOUSE	94.3	9	5	9	7560000	10000000	3	3	2	3		42158	Guanine nucleotide-binding protein G(q) subunit alpha OS=Mus musculus OX=10090 GN=Gnaq PE=1 SV=4
474	845	Q9D8N0|EF1G_MOUSE	94.08	8	8	5	4590000	3350000	3	3	3	2		50061	Elongation factor 1-gamma OS=Mus musculus OX=10090 GN=Eef1g PE=1 SV=3
459	757	Q7TQD2|TPPP_MOUSE	93.43	15	15	8	9070000	12500000	3	3	3	2		23575	Tubulin polymerization-promoting protein OS=Mus musculus OX=10090 GN=Tppp PE=1 SV=1
410	826	P12787|COX5A_MOUSE	93.14	21	14	16	18000000	5190000	3	3	3	3		16101	Cytochrome c oxidase subunit 5A mitochondrial OS=Mus musculus OX=10090 GN=Cox5a PE=1 SV=2
425	1138	Q9CQ69|QCR8_MOUSE	92.89	26	26	26	5430000	5620000	3	3	3	3		9768	Cytochrome b-c1 complex subunit 8 OS=Mus musculus OX=10090 GN=Uqcrq PE=1 SV=3
408	764	P62746|RHOB_MOUSE	92.43	16	16	16	3890000	5940000	3	3	3	3	Carbamidomethylation	22123	Rho-related GTP-binding protein RhoB OS=Mus musculus OX=10090 GN=Rhob PE=1 SV=1
279	579	P08551|NFL_MOUSE	92.37	6	6	6	8700000	8140000	5	3	5	4	Carbamidomethylation	61509	Neurofilament light polypeptide OS=Mus musculus OX=10090 GN=Nefl PE=1 SV=5
249	615	P28660|NCKP1_MOUSE	92.07	3	2	3	1460000	5520000	3	3	2	3		128784	Nck-associated protein 1 OS=Mus musculus OX=10090 GN=Nckap1 PE=1 SV=2
249	616	tr|A2AS98|A2AS98_MOUSE	92.07	3	2	3	1460000	5520000	3	3	2	3		129511	Nck-associated protein 1 OS=Mus musculus OX=10090 GN=Nckap1 PE=1 SV=1
367	842	P62806|H4_MOUSE	92.05	29	29	19	28200000	23800000	3	3	4	3		11367	Histone H4 OS=Mus musculus OX=10090 GN=Hist1h4a PE=1 SV=2
564	862	tr|H3BK84|H3BK84_MOUSE	91.53	17	8	17	0	2480000	3	3	1	3	Deamidation N	28464	cAMP-dependent protein kinase type II-beta regulatory subunit OS=Mus musculus OX=10090 GN=Prkar2b PE=1 SV=1
564	863	P31324|KAP3_MOUSE	91.53	11	5	11	0	2480000	3	3	1	3	Deamidation N	46167	cAMP-dependent protein kinase type II-beta regulatory subunit OS=Mus musculus OX=10090 GN=Prkar2b PE=1 SV=3
549	713	tr|F7BNZ5|F7BNZ5_MOUSE	90.9	10	7	6	2690000	2090000	3	3	2	2		40546	Breast carcinoma-amplified sequence 1 homolog (Fragment) OS=Mus musculus OX=10090 GN=Bcas1 PE=1 SV=1
549	714	tr|A2AVX1|A2AVX1_MOUSE	90.9	7	4	4	2690000	2090000	3	3	2	2		61163	Breast carcinoma-amplified sequence 1 homolog OS=Mus musculus OX=10090 GN=Bcas1 PE=1 SV=1
549	715	tr|E9Q8Q5|E9Q8Q5_MOUSE	90.9	6	4	4	2690000	2090000	3	3	2	2		62253	Breast carcinoma-amplified sequence 1 homolog OS=Mus musculus OX=10090 GN=Bcas1 PE=1 SV=1
549	716	Q80YN3|BCAS1_MOUSE	90.9	6	4	4	2690000	2090000	3	3	2	2		67378	Breast carcinoma-amplified sequence 1 homolog OS=Mus musculus OX=10090 GN=Bcas1 PE=1 SV=3
478	861	Q9CZC8|SCRN1_MOUSE	90.58	7	7	5	1810000	2540000	3	3	3	2	Carbamidomethylation	46326	Secernin-1 OS=Mus musculus OX=10090 GN=Scrn1 PE=1 SV=1
555	763	Q8BH95|ECHM_MOUSE	90.38	11	4	11	1730000	4950000	3	3	1	3	Carbamidomethylation	31474	Enoyl-CoA hydratase mitochondrial OS=Mus musculus OX=10090 GN=Echs1 PE=1 SV=1
481	869	P97315|CSRP1_MOUSE	90.25	20	20	11	4690000	5580000	3	3	3	2	Carbamidomethylation; Deamidation N	20583	Cysteine and glycine-rich protein 1 OS=Mus musculus OX=10090 GN=Csrp1 PE=1 SV=3
556	774	P04925|PRIO_MOUSE	87.48	12	12	4	1900000	740000	3	3	3	1		27977	Major prion protein OS=Mus musculus OX=10090 GN=Prnp PE=1 SV=2
477	860	Q9R1Q8|TAGL3_MOUSE	85.48	19	19	11	3270000	5120000	3	3	3	2	Deamidation N	22471	Transgelin-3 OS=Mus musculus OX=10090 GN=Tagln3 PE=1 SV=1
311	594	P62761|VISL1_MOUSE	84.61	21	16	16	6830000	1260000	4	3	4	4		22142	Visinin-like protein 1 OS=Mus musculus OX=10090 GN=Vsnl1 PE=1 SV=2
406	729	P59999|ARPC4_MOUSE	84.29	18	18	18	6170000	7180000	3	3	3	3		19667	Actin-related protein 2/3 complex subunit 4 OS=Mus musculus OX=10090 GN=Arpc4 PE=1 SV=3
673	841	P68040|RACK1_MOUSE	82.51	9	6	3	3530000	0	3	3	2	1		35077	Receptor of activated protein C kinase 1 OS=Mus musculus OX=10090 GN=Rack1 PE=1 SV=3
460	762	P97351|RS3A_MOUSE	82.36	11	11	6	6590000	5050000	3	3	3	2	Carbamidomethylation	29885	40S ribosomal protein S3a OS=Mus musculus OX=10090 GN=Rps3a PE=1 SV=3
282	647	Q9WUA3|PFKAP_MOUSE	82.33	4	4	4	3140000	5340000	3	3	3	4		85455	ATP-dependent 6-phosphofructokinase platelet type OS=Mus musculus OX=10090 GN=Pfkp PE=1 SV=1
282	646	tr|Q8C605|Q8C605_MOUSE	82.33	4	4	4	3140000	5340000	3	3	3	4		85547	ATP-dependent 6-phosphofructokinase OS=Mus musculus OX=10090 GN=Pfkp PE=1 SV=1
562	831	tr|G3UXL2|G3UXL2_MOUSE	82	10	10	2	2690000	1720000	3	3	3	1	Carbamidomethylation	34824	Phosphoribosyl pyrophosphate synthetase 1-like 3 OS=Mus musculus OX=10090 GN=Prps1l3 PE=3 SV=1
562	830	Q9D7G0|PRPS1_MOUSE	82	10	10	2	2690000	1720000	3	3	3	1	Carbamidomethylation	34834	Ribose-phosphate pyrophosphokinase 1 OS=Mus musculus OX=10090 GN=Prps1 PE=1 SV=4
466	788	Q80SW1|SAHH2_MOUSE	80.67	5	5	4	341000000	353000000	3	3	3	2	Carbamidomethylation	58952	S-adenosylhomocysteine hydrolase-like protein 1 OS=Mus musculus OX=10090 GN=Ahcyl1 PE=1 SV=1
554	759	Q9CR68|UCRI_MOUSE	80.46	9	6	6	10500000	8980000	3	3	2	2		29368	Cytochrome b-c1 complex subunit Rieske mitochondrial OS=Mus musculus OX=10090 GN=Uqcrfs1 PE=1 SV=1
552	739	Q9CWZ7|SNAG_MOUSE	79.82	9	3	9	1150000	2520000	3	3	1	3	Carbamidomethylation	34732	Gamma-soluble NSF attachment protein OS=Mus musculus OX=10090 GN=Napg PE=1 SV=1
552	740	tr|D3Z4B2|D3Z4B2_MOUSE	79.82	8	2	8	1150000	2520000	3	3	1	3	Carbamidomethylation	39367	Gamma-soluble NSF attachment protein (Fragment) OS=Mus musculus OX=10090 GN=Napg PE=1 SV=1
407	745	tr|Q924B0|Q924B0_MOUSE	79.1	11	11	11	4250000	4170000	3	3	3	3	Carbamidomethylation	30429	Inositol-1-monophosphatase OS=Mus musculus OX=10090 GN=Impa1 PE=1 SV=1
407	744	O55023|IMPA1_MOUSE	79.1	11	11	11	4250000	4170000	3	3	3	3	Carbamidomethylation	30436	Inositol monophosphatase 1 OS=Mus musculus OX=10090 GN=Impa1 PE=1 SV=1
486	904	tr|Q8BRQ9|Q8BRQ9_MOUSE	78.66	13	13	7	4280000	4400000	3	3	3	2	Deamidation N	32783	Sidoreflexin OS=Mus musculus OX=10090 GN=Sfxn5 PE=1 SV=1
486	905	Q925N0|SFXN5_MOUSE	78.66	11	11	6	4280000	4400000	3	3	3	2	Deamidation N	37329	Sideroflexin-5 OS=Mus musculus OX=10090 GN=Sfxn5 PE=1 SV=2
674	879	Q8BKZ9|ODPX_MOUSE	78.51	6	5	2	731000	0	3	3	2	1		53999	Pyruvate dehydrogenase protein X component mitochondrial OS=Mus musculus OX=10090 GN=Pdhx PE=1 SV=1
322	814	P61089|UBE2N_MOUSE	78.32	17	17	17	7380000	4940000	3	3	3	3	Carbamidomethylation	17138	Ubiquitin-conjugating enzyme E2 N OS=Mus musculus OX=10090 GN=Ube2n PE=1 SV=1
324	836	P00405|COX2_MOUSE	78.24	11	11	11	38700000	53300000	3	3	4	4		25976	Cytochrome c oxidase subunit 2 OS=Mus musculus OX=10090 GN=Mtco2 PE=1 SV=1
321	808	P26043|RADI_MOUSE	78.18	5	5	5	965000	2090000	3	3	3	4		68543	Radixin OS=Mus musculus OX=10090 GN=Rdx PE=1 SV=3
475	855	P54071|IDHP_MOUSE	76.89	7	4	7	2460000	4170000	3	3	2	3	Carbamidomethylation	50906	Isocitrate dehydrogenase [NADP] mitochondrial OS=Mus musculus OX=10090 GN=Idh2 PE=1 SV=3
24	1475	tr|Q9CPN9|Q9CPN9_MOUSE	76.6	5	5	5	33100000	46300000	3	3	4	5		26422	RIKEN cDNA 2210010C04 gene OS=Mus musculus OX=10090 GN=2210010C04Rik PE=1 SV=1
567	899	tr|H3BJP2|H3BJP2_MOUSE	75.52	16	16	4	1050000	1380000	3	3	3	1	Carbamidomethylation; Deamidation N	27131	S-formylglutathione hydrolase (Fragment) OS=Mus musculus OX=10090 GN=Esd PE=1 SV=1
567	900	tr|H3BLJ9|H3BLJ9_MOUSE	75.52	15	15	3	1050000	1380000	3	3	3	1	Carbamidomethylation; Deamidation N	28554	S-formylglutathione hydrolase OS=Mus musculus OX=10090 GN=Esd PE=1 SV=1
567	901	tr|H3BJL6|H3BJL6_MOUSE	75.52	15	15	3	1050000	1380000	3	3	3	1	Carbamidomethylation; Deamidation N	29347	S-formylglutathione hydrolase OS=Mus musculus OX=10090 GN=Esd PE=1 SV=1
567	902	Q9R0P3|ESTD_MOUSE	75.52	14	14	3	1050000	1380000	3	3	3	1	Carbamidomethylation; Deamidation N	31320	S-formylglutathione hydrolase OS=Mus musculus OX=10090 GN=Esd PE=1 SV=1
567	903	tr|H3BKH6|H3BKH6_MOUSE	75.52	13	13	3	1050000	1380000	3	3	3	1	Carbamidomethylation; Deamidation N	32829	S-formylglutathione hydrolase OS=Mus musculus OX=10090 GN=Esd PE=1 SV=1
319	797	Q8CGP1|H2B1K_MOUSE	75.12	21	21	21	37600000	41700000	3	3	3	4		13920	Histone H2B type 1-K OS=Mus musculus OX=10090 GN=Hist1h2bk PE=1 SV=3
319	796	Q64525|H2B2B_MOUSE	75.12	21	21	21	37600000	41700000	3	3	3	4		13920	Histone H2B type 2-B OS=Mus musculus OX=10090 GN=Hist2h2bb PE=1 SV=3
319	795	Q6ZWY9|H2B1C_MOUSE	75.12	21	21	21	37600000	41700000	3	3	3	4		13906	Histone H2B type 1-C/E/G OS=Mus musculus OX=10090 GN=Hist1h2bc PE=1 SV=3
319	794	Q64478|H2B1H_MOUSE	75.12	21	21	21	37600000	41700000	3	3	3	4		13920	Histone H2B type 1-H OS=Mus musculus OX=10090 GN=Hist1h2bh PE=1 SV=3
319	793	Q8CGP2|H2B1P_MOUSE	75.12	21	21	21	37600000	41700000	3	3	3	4		13992	Histone H2B type 1-P OS=Mus musculus OX=10090 GN=Hist1h2bp PE=1 SV=3
319	792	P10853|H2B1F_MOUSE	75.12	21	21	21	37600000	41700000	3	3	3	4		13936	Histone H2B type 1-F/J/L OS=Mus musculus OX=10090 GN=Hist1h2bf PE=1 SV=2
319	791	Q64475|H2B1B_MOUSE	75.12	21	21	21	37600000	41700000	3	3	3	4		13952	Histone H2B type 1-B OS=Mus musculus OX=10090 GN=Hist1h2bb PE=1 SV=3
319	790	P10854|H2B1M_MOUSE	75.12	21	21	21	37600000	41700000	3	3	3	4		13936	Histone H2B type 1-M OS=Mus musculus OX=10090 GN=Hist1h2bm PE=1 SV=2
319	798	tr|Q8CBB6|Q8CBB6_MOUSE	75.12	20	20	20	37600000	41700000	3	3	3	4		14888	Histone H2B OS=Mus musculus OX=10090 GN=Hist1h2bq PE=2 SV=1
364	752	tr|G3UX26|G3UX26_MOUSE	73.88	9	9	9	21200000	23900000	3	3	4	3		30446	Voltage-dependent anion-selective channel protein 2 OS=Mus musculus OX=10090 GN=Vdac2 PE=1 SV=1
364	754	Q60930|VDAC2_MOUSE	73.88	9	9	9	21200000	23900000	3	3	4	3		31733	Voltage-dependent anion-selective channel protein 2 OS=Mus musculus OX=10090 GN=Vdac2 PE=1 SV=2
463	771	Q9Z1B3|PLCB1_MOUSE	73.75	2	2	2	3310000	2470000	3	3	3	2		138396	1-phosphatidylinositol 4 5-bisphosphate phosphodiesterase beta-1 OS=Mus musculus OX=10090 GN=Plcb1 PE=1 SV=2
465	776	O35633|VIAAT_MOUSE	73.61	7	4	5	5030000	4320000	3	3	2	2		57381	Vesicular inhibitory amino acid transporter OS=Mus musculus OX=10090 GN=Slc32a1 PE=1 SV=3
415	884	P47911|RL6_MOUSE	72.69	11	6	11	3830000	4560000	3	3	2	3		33510	60S ribosomal protein L6 OS=Mus musculus OX=10090 GN=Rpl6 PE=1 SV=3
509	1396	Q9CQJ8|NDUB9_MOUSE	70.34	13	11	13	1850000	2980000	3	3	2	3	Carbamidomethylation	21984	NADH dehydrogenase [ubiquinone] 1 beta subcomplex subunit 9 OS=Mus musculus OX=10090 GN=Ndufb9 PE=1 SV=3
484	887	P58281|OPA1_MOUSE	66.63	3	2	3	1840000	3300000	3	3	2	3		111339	Dynamin-like 120 kDa protein mitochondrial OS=Mus musculus OX=10090 GN=Opa1 PE=1 SV=1
484	888	tr|H7BX01|H7BX01_MOUSE	66.63	3	2	3	1840000	3300000	3	3	2	3		113230	Dynamin-like 120 kDa protein mitochondrial OS=Mus musculus OX=10090 GN=Opa1 PE=1 SV=1
558	818	P25444|RS2_MOUSE	64.22	9	6	5	1770000	1320000	3	3	2	2		31231	40S ribosomal protein S2 OS=Mus musculus OX=10090 GN=Rps2 PE=1 SV=3
471	837	Q9CPU0|LGUL_MOUSE	64.02	12	9	12	6200000	8960000	3	3	2	3		20810	Lactoylglutathione lyase OS=Mus musculus OX=10090 GN=Glo1 PE=1 SV=3
479	864	tr|Q5PR72|Q5PR72_MOUSE	63.72	4	4	3	449000	671000	3	3	3	2	Carbamidomethylation; Deamidation N	105246	Phosphodiesterase OS=Mus musculus OX=10090 GN=Pde2a PE=1 SV=1
479	865	Q922S4|PDE2A_MOUSE	63.72	4	4	3	449000	671000	3	3	3	2	Carbamidomethylation; Deamidation N	105619	cGMP-dependent 3' 5'-cyclic phosphodiesterase OS=Mus musculus OX=10090 GN=Pde2a PE=1 SV=4
479	866	tr|A0A1B0GRJ9|A0A1B0GRJ9_MOUSE	63.72	4	4	3	449000	671000	3	3	3	2	Carbamidomethylation; Deamidation N	106356	Phosphodiesterase OS=Mus musculus OX=10090 GN=Pde2a PE=1 SV=1
479	867	tr|F7D3W5|F7D3W5_MOUSE	63.72	4	4	3	449000	671000	3	3	3	2	Carbamidomethylation; Deamidation N	107694	Phosphodiesterase OS=Mus musculus OX=10090 GN=Gm45837 PE=1 SV=1
323	817	Q8R0Y6|AL1L1_MOUSE	60.95	4	4	1	1290000	1010000	3	3	3	1		98709	Cytosolic 10-formyltetrahydrofolate dehydrogenase OS=Mus musculus OX=10090 GN=Aldh1l1 PE=1 SV=1
561	828	O88342|WDR1_MOUSE	60.46	4	3	1	2590000	1750000	3	3	2	2	Carbamidomethylation	66407	WD repeat-containing protein 1 OS=Mus musculus OX=10090 GN=Wdr1 PE=1 SV=3
488	913	Q9EQF6|DPYL5_MOUSE	59.5	5	3	4	5020000	7070000	3	3	2	2	Deamidation N	61516	Dihydropyrimidinase-related protein 5 OS=Mus musculus OX=10090 GN=Dpysl5 PE=1 SV=1
416	914	tr|Q9DAY9|Q9DAY9_MOUSE	58.98	11	6	11	3180000	4000000	3	3	2	3		28385	Nucleophosmin OS=Mus musculus OX=10090 GN=Npm1 PE=1 SV=1
416	915	tr|Q5SQB0|Q5SQB0_MOUSE	58.98	11	6	11	3180000	4000000	3	3	2	3		29525	Nucleophosmin OS=Mus musculus OX=10090 GN=Npm1 PE=1 SV=1
416	916	tr|Q5SQB5|Q5SQB5_MOUSE	58.98	10	6	10	3180000	4000000	3	3	2	3		31723	Nucleophosmin OS=Mus musculus OX=10090 GN=Npm1 PE=1 SV=1
416	917	Q61937|NPM_MOUSE	58.98	10	5	10	3180000	4000000	3	3	2	3		32560	Nucleophosmin OS=Mus musculus OX=10090 GN=Npm1 PE=1 SV=1
565	883	Q80TB8|VAT1L_MOUSE	58.51	5	2	5	19300000	8250000	3	3	1	3		45817	Synaptic vesicle membrane protein VAT-1 homolog-like OS=Mus musculus OX=10090 GN=Vat1l PE=1 SV=2
568	906	tr|F7B5B5|F7B5B5_MOUSE	58.24	5	5	2	2850000	1320000	3	3	3	1		59626	Heterogeneous nuclear ribonucleoprotein R OS=Mus musculus OX=10090 GN=Hnrnpr PE=1 SV=1
568	907	tr|Q8VHM5|Q8VHM5_MOUSE	58.24	5	5	1	2850000	1320000	3	3	3	1		70888	Heterogeneous nuclear ribonucleoprotein R OS=Mus musculus OX=10090 GN=Hnrnpr PE=1 SV=1
411	846	Q9D6M3|GHC1_MOUSE	57.78	7	5	7	10200000	15600000	3	3	2	3		34670	Mitochondrial glutamate carrier 1 OS=Mus musculus OX=10090 GN=Slc25a22 PE=1 SV=1
487	909	Q8K310|MATR3_MOUSE	55.28	4	2	4	1380000	13500000	3	3	2	3		94630	Matrin-3 OS=Mus musculus OX=10090 GN=Matr3 PE=1 SV=1
566	891	tr|E9Q8N5|E9Q8N5_MOUSE	53.46	3	1	2	58500	98100	3	3	1	2		140724	CLIP-associating protein 2 OS=Mus musculus OX=10090 GN=Clasp2 PE=1 SV=1
566	890	Q8BRT1|CLAP2_MOUSE	53.46	3	1	2	58500	98100	3	3	1	2		140738	CLIP-associating protein 2 OS=Mus musculus OX=10090 GN=Clasp2 PE=1 SV=1
566	892	tr|Q08EB6|Q08EB6_MOUSE	53.46	3	1	2	58500	98100	3	3	1	2		140881	CLIP-associating protein 2 OS=Mus musculus OX=10090 GN=Clasp2 PE=1 SV=1
566	893	tr|Q08EB5|Q08EB5_MOUSE	53.46	3	1	2	58500	98100	3	3	1	2		142515	CLIP-associating protein 2 OS=Mus musculus OX=10090 GN=Clasp2 PE=1 SV=1
566	894	tr|F7DCH5|F7DCH5_MOUSE	53.46	3	1	2	58500	98100	3	3	1	2		142850	CLIP-associating protein 2 OS=Mus musculus OX=10090 GN=Clasp2 PE=1 SV=1
1	9	P99024|TBB5_MOUSE	287.56	55	51	55	39900000	44100000	27	2	57	58	Carbamidomethylation; Deamidation N; Oxidation (M); HexNac	49671	Tubulin beta-5 chain OS=Mus musculus OX=10090 GN=Tubb5 PE=1 SV=1
10	28	Q9D6F9|TBB4A_MOUSE	277.94	49	49	49	43000000	42600000	25	2	49	51	Carbamidomethylation; Deamidation N; Oxidation (M); HexNac	49586	Tubulin beta-4A chain OS=Mus musculus OX=10090 GN=Tubb4a PE=1 SV=3
14	56	P16858|G3P_MOUSE	231.67	42	40	30	125000000	95600000	18	2	40	36	Carbamidomethylation; Deamidation N	35810	Glyceraldehyde-3-phosphate dehydrogenase OS=Mus musculus OX=10090 GN=Gapdh PE=1 SV=2
14	57	tr|A0A0A0MQF6|A0A0A0MQF6_MOUSE	231.67	39	37	28	125000000	95600000	18	2	40	36	Carbamidomethylation; Deamidation N	38653	Glyceraldehyde-3-phosphate dehydrogenase OS=Mus musculus OX=10090 GN=Gapdh PE=1 SV=1
46	34	tr|A0A0J9YUN4|A0A0J9YUN4_MOUSE	224.23	22	20	20	1980000	5840000	18	2	18	21	Carbamidomethylation; Deamidation N	97295	Dynamin-1 OS=Mus musculus OX=10090 GN=Dnm1 PE=1 SV=1
27	41	P05064|ALDOA_MOUSE	215.07	52	46	48	20600000	34900000	21	2	28	32	Carbamidomethylation; Deamidation N	39356	Fructose-bisphosphate aldolase A OS=Mus musculus OX=10090 GN=Aldoa PE=1 SV=2
27	42	tr|A6ZI44|A6ZI44_MOUSE	215.07	45	40	42	20600000	34900000	21	2	28	32	Carbamidomethylation; Deamidation N	45120	Fructose-bisphosphate aldolase OS=Mus musculus OX=10090 GN=Aldoa PE=1 SV=1
104	141	P97427|DPYL1_MOUSE	169.34	16	13	16	8260000	8960000	8	2	9	11	Deamidation N	62168	Dihydropyrimidinase-related protein 1 OS=Mus musculus OX=10090 GN=Crmp1 PE=1 SV=1
104	142	tr|Q6P1J1|Q6P1J1_MOUSE	169.34	14	11	14	8260000	8960000	8	2	9	11	Deamidation N	74221	Crmp1 protein OS=Mus musculus OX=10090 GN=Crmp1 PE=1 SV=1
116	169	tr|Q5SVG5|Q5SVG5_MOUSE	150.08	8	8	7	3310000	546000	8	2	10	8	Carbamidomethylation	101193	AP complex subunit beta OS=Mus musculus OX=10090 GN=Ap1b1 PE=1 SV=1
116	170	tr|Q5SVG4|Q5SVG4_MOUSE	150.08	8	8	7	3310000	546000	8	2	10	8	Carbamidomethylation	101898	AP complex subunit beta OS=Mus musculus OX=10090 GN=Ap1b1 PE=1 SV=1
116	171	O35643|AP1B1_MOUSE	150.08	8	8	7	3310000	546000	8	2	10	8	Carbamidomethylation	103935	AP-1 complex subunit beta-1 OS=Mus musculus OX=10090 GN=Ap1b1 PE=1 SV=2
399	677	Q91ZZ3|SYUB_MOUSE	134.76	36	36	26	0	0	3	2	3	3	Deamidation N	14052	Beta-synuclein OS=Mus musculus OX=10090 GN=Sncb PE=1 SV=1
138	277	tr|Q5SVI9|Q5SVI9_MOUSE	131.21	14	14	10	1070000	1130000	6	2	7	8	Carbamidomethylation	54104	Calcium/calmodulin-dependent protein kinase type II subunit beta OS=Mus musculus OX=10090 GN=Camk2b PE=1 SV=1
138	278	tr|Q5SVJ1|Q5SVJ1_MOUSE	131.21	14	14	10	1070000	1130000	6	2	7	8	Carbamidomethylation	56453	Calcium/calmodulin-dependent protein kinase type II subunit beta OS=Mus musculus OX=10090 GN=Camk2b PE=1 SV=1
138	280	tr|Q5SVI0|Q5SVI0_MOUSE	131.21	13	13	10	1070000	1130000	6	2	7	8	Carbamidomethylation	58083	Calcium/calmodulin-dependent protein kinase type II subunit beta OS=Mus musculus OX=10090 GN=Camk2b PE=1 SV=1
138	279	tr|Q5SVI3|Q5SVI3_MOUSE	131.21	13	13	10	1070000	1130000	6	2	7	8	Carbamidomethylation	58111	Calcium/calmodulin-dependent protein kinase type II subunit beta OS=Mus musculus OX=10090 GN=Camk2b PE=1 SV=1
138	281	tr|Q5SVI2|Q5SVI2_MOUSE	131.21	13	13	9	1070000	1130000	6	2	7	8	Carbamidomethylation	59292	Calcium/calmodulin-dependent protein kinase type II subunit beta OS=Mus musculus OX=10090 GN=Camk2b PE=1 SV=1
138	282	P28652|KCC2B_MOUSE	131.21	13	13	9	1070000	1130000	6	2	7	8	Carbamidomethylation	60461	Calcium/calmodulin-dependent protein kinase type II subunit beta OS=Mus musculus OX=10090 GN=Camk2b PE=1 SV=2
138	283	tr|Q68EG2|Q68EG2_MOUSE	131.21	13	13	9	1070000	1130000	6	2	7	8	Carbamidomethylation	60676	Calcium/calmodulin-dependent protein kinase type II subunit beta OS=Mus musculus OX=10090 GN=Camk2b PE=1 SV=1
138	284	tr|Q5SVI1|Q5SVI1_MOUSE	131.21	12	12	8	1070000	1130000	6	2	7	8	Carbamidomethylation	65035	Calcium/calmodulin-dependent protein kinase type II subunit beta OS=Mus musculus OX=10090 GN=Camk2b PE=1 SV=1
138	285	tr|Q5SVJ0|Q5SVJ0_MOUSE	131.21	10	10	8	1070000	1130000	6	2	7	8	Carbamidomethylation	72903	Calcium/calmodulin-dependent protein kinase II beta isoform CRA_b OS=Mus musculus OX=10090 GN=Camk2b PE=1 SV=1
221	296	P10649|GSTM1_MOUSE	120.28	29	24	29	12600000	13500000	6	2	5	6	Carbamidomethylation	25970	Glutathione S-transferase Mu 1 OS=Mus musculus OX=10090 GN=Gstm1 PE=1 SV=2
221	297	tr|A2AE89|A2AE89_MOUSE	120.28	26	21	26	12600000	13500000	6	2	5	6	Carbamidomethylation	28556	Glutathione S-transferase Mu 1 OS=Mus musculus OX=10090 GN=Gstm1 PE=1 SV=2
185	661	P56564|EAA1_MOUSE	119.87	9	9	9	121000	237000	4	2	5	8	Carbamidomethylation; Deamidation N	59622	Excitatory amino acid transporter 1 OS=Mus musculus OX=10090 GN=Slc1a3 PE=1 SV=2
413	873	Q9DB05|SNAA_MOUSE	112.38	17	17	9	825000	1150000	3	2	3	2	Deamidation N	33190	Alpha-soluble NSF attachment protein OS=Mus musculus OX=10090 GN=Napa PE=1 SV=1
308	533	tr|A0A0G2JGC1|A0A0G2JGC1_MOUSE	108.86	14	11	11	1860000	1480000	5	2	4	4	Carbamidomethylation	31367	Serine/threonine-protein phosphatase OS=Mus musculus OX=10090 GN=Ppp1cc PE=1 SV=1
308	536	tr|A0A0G2JFF1|A0A0G2JFF1_MOUSE	108.86	13	11	10	1860000	1480000	5	2	4	4	Carbamidomethylation	33320	Serine/threonine-protein phosphatase (Fragment) OS=Mus musculus OX=10090 GN=Ppp1cc PE=1 SV=1
308	537	P63087|PP1G_MOUSE	108.86	12	10	9	1860000	1480000	5	2	4	4	Carbamidomethylation	36984	Serine/threonine-protein phosphatase PP1-gamma catalytic subunit OS=Mus musculus OX=10090 GN=Ppp1cc PE=1 SV=1
245	480	P35278|RAB5C_MOUSE	108.34	21	16	21	1120000	1490000	4	2	4	5		23412	Ras-related protein Rab-5C OS=Mus musculus OX=10090 GN=Rab5c PE=1 SV=2
245	481	tr|Q8C266|Q8C266_MOUSE	108.34	20	15	20	1120000	1490000	4	2	4	5		25352	Ras-related protein Rab-5C OS=Mus musculus OX=10090 GN=Rab5c PE=1 SV=1
299	424	P63001|RAC1_MOUSE	108.26	23	23	16	22500000	12500000	4	2	4	3	Carbamidomethylation	21450	Ras-related C3 botulinum toxin substrate 1 OS=Mus musculus OX=10090 GN=Rac1 PE=1 SV=1
299	425	tr|Q3TLP8|Q3TLP8_MOUSE	108.26	21	21	14	22500000	12500000	4	2	4	3	Carbamidomethylation	23432	RAS-related C3 botulinum substrate 1 isoform CRA_a OS=Mus musculus OX=10090 GN=Rac1 PE=1 SV=1
402	707	tr|A2AEG6|A2AEG6_MOUSE	107.2	10	6	10	3630000	5370000	3	2	2	4	Carbamidomethylation	36197	Glycoprotein m6b isoform CRA_g OS=Mus musculus OX=10090 GN=Gpm6b PE=1 SV=1
402	706	P35803|GPM6B_MOUSE	107.2	10	6	10	3630000	5370000	3	2	2	4	Carbamidomethylation	36210	Neuronal membrane glycoprotein M6-b OS=Mus musculus OX=10090 GN=Gpm6b PE=1 SV=2
582	1025	Q9WUM5|SUCA_MOUSE	107.13	8	8	8	6540000	6950000	2	2	2	2	Carbamidomethylation	36155	Succinate--CoA ligase [ADP/GDP-forming] subunit alpha mitochondrial OS=Mus musculus OX=10090 GN=Suclg1 PE=1 SV=4
257	293	tr|A1BN54|A1BN54_MOUSE	106.31	7	5	5	1020000	3180000	6	2	5	4		102720	Alpha actinin 1a OS=Mus musculus OX=10090 GN=Actn1 PE=1 SV=1
257	294	Q7TPR4|ACTN1_MOUSE	106.31	7	5	5	1020000	3180000	6	2	5	4		103068	Alpha-actinin-1 OS=Mus musculus OX=10090 GN=Actn1 PE=1 SV=1
372	1023	P51150|RAB7A_MOUSE	104.22	13	13	13	2100000	2280000	2	2	4	3		23490	Ras-related protein Rab-7a OS=Mus musculus OX=10090 GN=Rab7a PE=1 SV=2
677	1027	P35762|CD81_MOUSE	103.95	19	10	19	0	133000	2	2	1	2	Carbamidomethylation; Deamidation N	25815	CD81 antigen OS=Mus musculus OX=10090 GN=Cd81 PE=1 SV=2
453	687	P32883|RASK_MOUSE	103.37	20	14	20	946000	1330000	3	2	2	3	Carbamidomethylation	21656	GTPase KRas OS=Mus musculus OX=10090 GN=Kras PE=1 SV=1
343	446	tr|G5E8R0|G5E8R0_MOUSE	101.57	17	14	12	1420000	2010000	4	2	3	3		28343	Tropomyosin 1 alpha isoform CRA_i OS=Mus musculus OX=10090 GN=Tpm1 PE=1 SV=1
343	447	tr|G5E8R1|G5E8R1_MOUSE	101.57	17	14	12	1420000	2010000	4	2	3	3		28557	Tropomyosin 1 alpha isoform CRA_j OS=Mus musculus OX=10090 GN=Tpm1 PE=1 SV=1
343	448	tr|E9Q455|E9Q455_MOUSE	101.57	16	14	12	1420000	2010000	4	2	3	3		28748	Tropomyosin alpha-1 chain OS=Mus musculus OX=10090 GN=Tpm1 PE=1 SV=1
448	624	P60335|PCBP1_MOUSE	100.31	11	4	11	1850000	3150000	3	2	1	3	Carbamidomethylation	37498	Poly(rC)-binding protein 1 OS=Mus musculus OX=10090 GN=Pcbp1 PE=1 SV=1
581	1024	Q9D172|GAL3A_MOUSE	99.07	15	15	15	2230000	2380000	2	2	2	2	Carbamidomethylation; Deamidation N	28090	Glutamine amidotransferase-like class 1 domain-containing protein 3A mitochondrial OS=Mus musculus OX=10090 GN=Gatd3a PE=1 SV=1
500	1043	Q8BG39|SV2B_MOUSE	98.72	3	3	3	2700000	3680000	2	2	3	2	Carbamidomethylation; Deamidation N	77457	Synaptic vesicle glycoprotein 2B OS=Mus musculus OX=10090 GN=Sv2b PE=1 SV=1
396	625	tr|E9PZF0|E9PZF0_MOUSE	98.42	13	7	13	2040000	2270000	3	2	2	3		30200	Nucleoside diphosphate kinase OS=Mus musculus OX=10090 GN=Gm20390 PE=3 SV=1
588	1127	tr|E0CY16|E0CY16_MOUSE	98.18	6	6	6	1490000	2250000	2	2	2	2	Carbamidomethylation	42892	Cell adhesion molecule 1 OS=Mus musculus OX=10090 GN=Cadm1 PE=1 SV=1
588	1132	Q8R5M8|CADM1_MOUSE	98.18	5	5	5	1490000	2250000	2	2	2	2	Carbamidomethylation	49789	Cell adhesion molecule 1 OS=Mus musculus OX=10090 GN=Cadm1 PE=1 SV=2
588	1133	tr|E9PYN1|E9PYN1_MOUSE	98.18	5	5	5	1490000	2250000	2	2	2	2	Carbamidomethylation	51689	Cell adhesion molecule 1 OS=Mus musculus OX=10090 GN=Cadm1 PE=1 SV=1
473	843	tr|Q3UZP7|Q3UZP7_MOUSE	97.71	23	13	23	925000	1520000	3	2	2	3		19430	Paralemmin-1 OS=Mus musculus OX=10090 GN=Palm PE=1 SV=1
473	848	Q9Z0P4|PALM_MOUSE	97.71	11	6	11	925000	1520000	3	2	2	3		41614	Paralemmin-1 OS=Mus musculus OX=10090 GN=Palm PE=1 SV=1
689	1117	O55022|PGRC1_MOUSE	97.49	12	12	5	1930000	0	2	2	2	1	Carbamidomethylation	21694	Membrane-associated progesterone receptor component 1 OS=Mus musculus OX=10090 GN=Pgrmc1 PE=1 SV=4
585	1065	Q9CPQ8|ATP5L_MOUSE	94.79	27	27	9	18200000	10200000	2	2	3	1		11425	ATP synthase subunit g mitochondrial OS=Mus musculus OX=10090 GN=Atp5mg PE=1 SV=1
679	1042	Q80UW2|FBX2_MOUSE	93.58	9	9	4	911000	0	2	2	2	1	Carbamidomethylation	33676	F-box only protein 2 OS=Mus musculus OX=10090 GN=Fbxo2 PE=1 SV=1
405	717	P12658|CALB1_MOUSE	92.09	11	8	11	3020000	5020000	3	2	3	3		29994	Calbindin OS=Mus musculus OX=10090 GN=Calb1 PE=1 SV=2
462	768	P07759|SPA3K_MOUSE	91.08	9	6	9	2490000	673000	3	2	2	3	Carbamidomethylation	46880	Serine protease inhibitor A3K OS=Mus musculus OX=10090 GN=Serpina3k PE=1 SV=2
690	1131	Q9R0P5|DEST_MOUSE	90.47	13	13	5	2460000	714000	2	2	2	1	Carbamidomethylation	18522	Destrin OS=Mus musculus OX=10090 GN=Dstn PE=1 SV=3
687	1098	Q5M8N0|CNRP1_MOUSE	90.01	16	10	16	1050000	1610000	2	2	1	2		18612	CB1 cannabinoid receptor-interacting protein 1 OS=Mus musculus OX=10090 GN=Cnrip1 PE=1 SV=1
687	1099	tr|F7C0H6|F7C0H6_MOUSE	90.01	15	9	15	1050000	1610000	2	2	1	2		20726	CB1 cannabinoid receptor-interacting protein 1 (Fragment) OS=Mus musculus OX=10090 GN=Cnrip1 PE=1 SV=1
583	1036	Q93092|TALDO_MOUSE	89.4	7	7	7	1880000	2530000	2	2	2	2	Carbamidomethylation	37387	Transaldolase OS=Mus musculus OX=10090 GN=Taldo1 PE=1 SV=2
583	1037	tr|A0A1B0GR11|A0A1B0GR11_MOUSE	89.4	6	6	6	1880000	2530000	2	2	2	2	Carbamidomethylation	42151	Transaldolase OS=Mus musculus OX=10090 GN=Taldo1 PE=1 SV=1
688	1111	tr|E9Q5B6|E9Q5B6_MOUSE	87.91	21	21	7	4060000	738000	2	2	2	1		12139	Heterogeneous nuclear ribonucleoprotein D0 (Fragment) OS=Mus musculus OX=10090 GN=Hnrnpd PE=1 SV=1
688	1142	tr|F6ZV59|F6ZV59_MOUSE	87.91	10	10	4	4060000	738000	2	2	2	1		24730	Heterogeneous nuclear ribonucleoprotein D0 (Fragment) OS=Mus musculus OX=10090 GN=Hnrnpd PE=1 SV=1
688	1160	tr|G5E8G0|G5E8G0_MOUSE	87.91	8	8	3	4060000	738000	2	2	2	1		30608	Heterogeneous nuclear ribonucleoprotein D isoform CRA_b OS=Mus musculus OX=10090 GN=Hnrnpd PE=1 SV=1
688	1186	tr|G3X9W0|G3X9W0_MOUSE	87.91	7	7	2	4060000	738000	2	2	2	1		36208	Heterogeneous nuclear ribonucleoprotein D isoform CRA_a OS=Mus musculus OX=10090 GN=Hnrnpd PE=1 SV=1
688	1187	Q60668|HNRPD_MOUSE	87.91	6	6	2	4060000	738000	2	2	2	1		38354	Heterogeneous nuclear ribonucleoprotein D0 OS=Mus musculus OX=10090 GN=Hnrnpd PE=1 SV=2
586	1073	P47754|CAZA2_MOUSE	87.84	9	9	9	3370000	3070000	2	2	2	2		32967	F-actin-capping protein subunit alpha-2 OS=Mus musculus OX=10090 GN=Capza2 PE=1 SV=3
678	1035	Q9DCT2|NDUS3_MOUSE	87.46	10	10	5	3090000	2240000	2	2	2	1		30149	NADH dehydrogenase [ubiquinone] iron-sulfur protein 3 mitochondrial OS=Mus musculus OX=10090 GN=Ndufs3 PE=1 SV=2
592	1152	Q3UGR5|HDHD2_MOUSE	86.91	8	8	8	1990000	2990000	2	2	2	2		28730	Haloacid dehalogenase-like hydrolase domain-containing protein 2 OS=Mus musculus OX=10090 GN=Hdhd2 PE=1 SV=2
422	1068	P19536|COX5B_MOUSE	86.63	23	23	23	19800000	19700000	2	2	3	3		13813	Cytochrome c oxidase subunit 5B mitochondrial OS=Mus musculus OX=10090 GN=Cox5b PE=1 SV=1
422	1069	tr|Q9D881|Q9D881_MOUSE	86.63	23	23	23	19800000	19700000	2	2	3	3		13847	Cytochrome c oxidase subunit 5B mitochondrial OS=Mus musculus OX=10090 GN=Gm11273 PE=1 SV=1
710	1324	tr|D3Z7C6|D3Z7C6_MOUSE	85.98	18	5	18	2380000	3790000	2	2	1	2	Carbamidomethylation	14983	Prostaglandin E synthase 3 OS=Mus musculus OX=10090 GN=Ptges3 PE=1 SV=1
710	1327	Q9R0Q7|TEBP_MOUSE	85.98	15	4	15	2380000	3790000	2	2	1	2	Carbamidomethylation	18721	Prostaglandin E synthase 3 OS=Mus musculus OX=10090 GN=Ptges3 PE=1 SV=1
857	1208	tr|A0A0A0MQM0|A0A0A0MQM0_MOUSE	85.61	16	8	8	917000	0	2	2	1	1		16303	Eukaryotic translation initiation factor 5A (Fragment) OS=Mus musculus OX=10090 GN=Eif5a PE=1 SV=1
857	1209	P63242|IF5A1_MOUSE	85.61	16	8	8	917000	0	2	2	1	1		16832	Eukaryotic translation initiation factor 5A-1 OS=Mus musculus OX=10090 GN=Eif5a PE=1 SV=2
693	1154	tr|D3Z6G3|D3Z6G3_MOUSE	85.39	7	4	7	1450000	2270000	2	2	1	2	Carbamidomethylation	30364	Microtubule-associated protein RP/EB family member 3 OS=Mus musculus OX=10090 GN=Mapre3 PE=1 SV=1
693	1155	Q6PER3|MARE3_MOUSE	85.39	7	4	7	1450000	2270000	2	2	1	2	Carbamidomethylation	31966	Microtubule-associated protein RP/EB family member 3 OS=Mus musculus OX=10090 GN=Mapre3 PE=1 SV=1
754	1663	tr|A0A1Y7VL93|A0A1Y7VL93_MOUSE	85.23	11	9	11	256000	2460000	2	2	1	2		15353	Ras-related protein Ral-A (Fragment) OS=Mus musculus OX=10090 GN=Rala PE=1 SV=1
754	1664	P63321|RALA_MOUSE	85.23	7	6	7	256000	2460000	2	2	1	2		23553	Ras-related protein Ral-A OS=Mus musculus OX=10090 GN=Rala PE=1 SV=1
551	724	P80316|TCPE_MOUSE	85.14	7	2	7	1380000	4110000	3	2	1	3	Carbamidomethylation	59624	T-complex protein 1 subunit epsilon OS=Mus musculus OX=10090 GN=Cct5 PE=1 SV=1
456	730	tr|Q6DFY2|Q6DFY2_MOUSE	84.85	9	6	9	6450000	7730000	3	2	2	3		37156	Opioid-binding protein/cell adhesion molecule-like OS=Mus musculus OX=10090 GN=Opcml PE=1 SV=1
456	731	tr|G5E8G3|G5E8G3_MOUSE	84.85	9	6	9	6450000	7730000	3	2	2	3		38011	MCG9827 OS=Mus musculus OX=10090 GN=Opcml PE=1 SV=1
501	1047	tr|S4R1N1|S4R1N1_MOUSE	84.23	10	10	10	1020000	1520000	2	2	2	3		24078	60S acidic ribosomal protein P0 (Fragment) OS=Mus musculus OX=10090 GN=Rplp0 PE=1 SV=1
501	1051	P14869|RLA0_MOUSE	84.23	7	7	7	1020000	1520000	2	2	2	3		34216	60S acidic ribosomal protein P0 OS=Mus musculus OX=10090 GN=Rplp0 PE=1 SV=3
511	1412	P63213|GBG2_MOUSE	83.56	32	23	32	3250000	7540000	2	2	2	3		7850	Guanine nucleotide-binding protein G(I)/G(S)/G(O) subunit gamma-2 OS=Mus musculus OX=10090 GN=Gng2 PE=1 SV=2
697	1218	Q8R1I1|QCR9_MOUSE	82.86	38	38	11	11900000	8100000	2	2	2	1		7446	Cytochrome b-c1 complex subunit 9 OS=Mus musculus OX=10090 GN=Uqcr10 PE=1 SV=1
856	1080	Q8CCT4|TCAL5_MOUSE	82.45	12	12	0	1660000		2	2	2	0		22038	Transcription elongation factor A protein-like 5 OS=Mus musculus OX=10090 GN=Tceal5 PE=1 SV=1
594	1188	Q9D3D9|ATPD_MOUSE	82.4	14	14	14	9260000	10200000	2	2	2	2		17600	ATP synthase subunit delta mitochondrial OS=Mus musculus OX=10090 GN=Atp5f1d PE=1 SV=1
315	643	Q6R0H7|GNAS1_MOUSE	82	3	3	3	1540000	1890000	3	2	3	4		121505	Guanine nucleotide-binding protein G(s) subunit alpha isoforms XLas OS=Mus musculus OX=10090 GN=Gnas PE=1 SV=1
587	1078	tr|G3UZM4|G3UZM4_MOUSE	80.9	5	5	5	3600000	4120000	2	2	2	2	Carbamidomethylation	47346	Cell adhesion molecule 2 (Fragment) OS=Mus musculus OX=10090 GN=Cadm2 PE=1 SV=1
587	1077	Q8BLQ9|CADM2_MOUSE	80.9	5	5	5	3600000	4120000	2	2	2	2	Carbamidomethylation	47559	Cell adhesion molecule 2 OS=Mus musculus OX=10090 GN=Cadm2 PE=1 SV=2
680	1062	P03930|ATP8_MOUSE	80.89	34	34	15	19900000	14000000	2	2	2	1		7766	ATP synthase protein 8 OS=Mus musculus OX=10090 GN=Mtatp8 PE=1 SV=1
514	1530	Q9D0J8|PTMS_MOUSE	80.76	12	12	12	872000	1280000	2	2	2	2		11430	Parathymosin OS=Mus musculus OX=10090 GN=Ptms PE=1 SV=3
450	641	P19246|NFH_MOUSE	80.61	3	1	3		829000	3	2	1	3	Carbamidomethylation	116994	Neurofilament heavy polypeptide OS=Mus musculus OX=10090 GN=Nefh PE=1 SV=3
423	1085	Q63810|CANB1_MOUSE	80.57	13	13	13	16700000	17200000	2	2	3	3		19300	Calcineurin subunit B type 1 OS=Mus musculus OX=10090 GN=Ppp3r1 PE=1 SV=3
419	945	tr|A0A0G2JGQ6|A0A0G2JGQ6_MOUSE	79.86	4	4	4	708000	616000	2	2	2	2		82105	Serine/threonine-protein kinase DCLK1 OS=Mus musculus OX=10090 GN=Dclk1 PE=1 SV=1
419	946	Q9JLM8|DCLK1_MOUSE	79.86	4	4	4	708000	616000	2	2	2	2		84153	Serine/threonine-protein kinase DCLK1 OS=Mus musculus OX=10090 GN=Dclk1 PE=1 SV=1
584	1063	Q9CYH2|PXL2A_MOUSE	79.73	11	11	11	996000	1530000	2	2	2	2		24395	Peroxiredoxin-like 2A OS=Mus musculus OX=10090 GN=Prxl2a PE=1 SV=2
584	1064	tr|Q3U125|Q3U125_MOUSE	79.73	10	10	10	996000	1530000	2	2	2	2		25682	Peroxiredoxin-like 2A OS=Mus musculus OX=10090 GN=Prxl2a PE=1 SV=1
577	985	Q9R0Y5|KAD1_MOUSE	78.32	11	6	11	4550000	5510000	2	2	1	2		21540	Adenylate kinase isoenzyme 1 OS=Mus musculus OX=10090 GN=Ak1 PE=1 SV=1
858	1213	tr|Q8BQB5|Q8BQB5_MOUSE	78.16	6	6	0	750000		2	2	2	0	Carbamidomethylation	33370	RIKEN cDNA 6430548M08 gene OS=Mus musculus OX=10090 GN=6430548M08Rik PE=1 SV=1
858	1222	tr|Q3TA40|Q3TA40_MOUSE	78.16	5	5	0	750000		2	2	2	0	Carbamidomethylation	45218	RIKEN cDNA 6430548M08 gene OS=Mus musculus OX=10090 GN=6430548M08Rik PE=1 SV=1
858	1223	Q8R0A7|K0513_MOUSE	78.16	5	5	0	750000		2	2	2	0	Carbamidomethylation	46318	Uncharacterized protein KIAA0513 OS=Mus musculus OX=10090 GN=Kiaa0513 PE=1 SV=1
605	1276	tr|B0R1E3|B0R1E3_MOUSE	77.67	18	18	18	11200000	10700000	2	2	2	2		13439	Histidine triad nucleotide-binding protein 1 OS=Mus musculus OX=10090 GN=Hint1 PE=1 SV=1
605	1278	P70349|HINT1_MOUSE	77.67	17	17	17	11200000	10700000	2	2	2	2		13777	Histidine triad nucleotide-binding protein 1 OS=Mus musculus OX=10090 GN=Hint1 PE=1 SV=3
280	604	Q3ULJ0|GPD1L_MOUSE	76.63	10	10	10	2100000	2790000	4	2	4	4		38226	Glycerol-3-phosphate dehydrogenase 1-like protein OS=Mus musculus OX=10090 GN=Gpd1l PE=1 SV=2
682	1083	tr|A0A1B0GS70|A0A1B0GS70_MOUSE	76.55	11	11	5	1670000	0	2	2	2	1		26496	Proteasome endopeptidase complex OS=Mus musculus OX=10090 GN=Psma1 PE=1 SV=1
682	1084	Q9R1P4|PSA1_MOUSE	76.55	10	10	5	1670000	0	2	2	2	1		29547	Proteasome subunit alpha type-1 OS=Mus musculus OX=10090 GN=Psma1 PE=1 SV=1
683	1086	tr|E0CXB1|E0CXB1_MOUSE	76.27	11	5	11	1600000	1450000	2	2	1	2		25264	Proteasome endopeptidase complex OS=Mus musculus OX=10090 GN=Psma6 PE=1 SV=1
683	1087	Q9QUM9|PSA6_MOUSE	76.27	10	5	10	1600000	1450000	2	2	1	2		27372	Proteasome subunit alpha type-6 OS=Mus musculus OX=10090 GN=Psma6 PE=1 SV=1
686	1095	P14206|RSSA_MOUSE	76.21	7	7	3	837000	1110000	2	2	2	1	Carbamidomethylation	32838	40S ribosomal protein SA OS=Mus musculus OX=10090 GN=Rpsa PE=1 SV=4
369	1112	tr|A0A2R8W6N3|A0A2R8W6N3_MOUSE	76.15	4	4	4	1040000	1350000	2	2	2	3		63308	Oxidation resistance protein 1 OS=Mus musculus OX=10090 GN=Oxr1 PE=1 SV=1
369	1121	tr|E9Q0A7|E9Q0A7_MOUSE	76.15	3	3	3	1040000	1350000	2	2	2	3		91742	Oxidation resistance protein 1 OS=Mus musculus OX=10090 GN=Oxr1 PE=1 SV=1
369	1122	Q4KMM3|OXR1_MOUSE	76.15	3	3	3	1040000	1350000	2	2	2	3		95912	Oxidation resistance protein 1 OS=Mus musculus OX=10090 GN=Oxr1 PE=1 SV=3
504	1161	tr|A0A0N4SV66|A0A0N4SV66_MOUSE	75.72	22	22	22	18900000	22100000	2	2	2	2		13660	Histone H2A OS=Mus musculus OX=10090 GN=H2afj PE=1 SV=1
504	1162	Q8CGP6|H2A1H_MOUSE	75.72	22	22	22	18900000	22100000	2	2	2	2		13950	Histone H2A type 1-H OS=Mus musculus OX=10090 GN=Hist1h2ah PE=1 SV=3
504	1165	Q64523|H2A2C_MOUSE	75.72	22	22	22	18900000	22100000	2	2	2	2		13988	Histone H2A type 2-C OS=Mus musculus OX=10090 GN=Hist2h2ac PE=1 SV=3
504	1164	Q8R1M2|H2AJ_MOUSE	75.72	22	22	22	18900000	22100000	2	2	2	2		14045	Histone H2A.J OS=Mus musculus OX=10090 GN=H2afj PE=1 SV=1
504	1163	tr|Q8CGP4|Q8CGP4_MOUSE	75.72	22	22	22	18900000	22100000	2	2	2	2		14056	Histone H2A OS=Mus musculus OX=10090 GN=Hist1h2aa PE=1 SV=1
504	1179	C0HKE8|H2A1O_MOUSE	75.72	22	22	22	18900000	22100000	2	2	2	2		14135	Histone H2A type 1-O OS=Mus musculus OX=10090 GN=Hist1h2ao PE=1 SV=1
504	1178	C0HKE2|H2A1C_MOUSE	75.72	22	22	22	18900000	22100000	2	2	2	2		14135	Histone H2A type 1-C OS=Mus musculus OX=10090 GN=Hist1h2ac PE=1 SV=1
504	1177	C0HKE1|H2A1B_MOUSE	75.72	22	22	22	18900000	22100000	2	2	2	2		14135	Histone H2A type 1-B OS=Mus musculus OX=10090 GN=Hist1h2ab PE=1 SV=1
504	1176	C0HKE4|H2A1E_MOUSE	75.72	22	22	22	18900000	22100000	2	2	2	2		14135	Histone H2A type 1-E OS=Mus musculus OX=10090 GN=Hist1h2ae PE=1 SV=1
504	1175	Q8CGP7|H2A1K_MOUSE	75.72	22	22	22	18900000	22100000	2	2	2	2		14150	Histone H2A type 1-K OS=Mus musculus OX=10090 GN=Hist1h2ak PE=1 SV=3
504	1174	C0HKE6|H2A1I_MOUSE	75.72	22	22	22	18900000	22100000	2	2	2	2		14135	Histone H2A type 1-I OS=Mus musculus OX=10090 GN=Hist1h2ai PE=1 SV=1
504	1173	C0HKE3|H2A1D_MOUSE	75.72	22	22	22	18900000	22100000	2	2	2	2		14135	Histone H2A type 1-D OS=Mus musculus OX=10090 GN=Hist1h2ad PE=1 SV=1
504	1172	Q64522|H2A2B_MOUSE	75.72	22	22	22	18900000	22100000	2	2	2	2		14013	Histone H2A type 2-B OS=Mus musculus OX=10090 GN=Hist2h2ab PE=1 SV=3
504	1171	C0HKE7|H2A1N_MOUSE	75.72	22	22	22	18900000	22100000	2	2	2	2		14135	Histone H2A type 1-N OS=Mus musculus OX=10090 GN=Hist1h2an PE=1 SV=1
504	1170	C0HKE5|H2A1G_MOUSE	75.72	22	22	22	18900000	22100000	2	2	2	2		14135	Histone H2A type 1-G OS=Mus musculus OX=10090 GN=Hist1h2ag PE=1 SV=1
504	1169	Q8CGP5|H2A1F_MOUSE	75.72	22	22	22	18900000	22100000	2	2	2	2		14162	Histone H2A type 1-F OS=Mus musculus OX=10090 GN=Hist1h2af PE=1 SV=3
504	1168	C0HKE9|H2A1P_MOUSE	75.72	22	22	22	18900000	22100000	2	2	2	2		14135	Histone H2A type 1-P OS=Mus musculus OX=10090 GN=Hist1h2ap PE=1 SV=1
504	1167	Q8BFU2|H2A3_MOUSE	75.72	22	22	22	18900000	22100000	2	2	2	2		14121	Histone H2A type 3 OS=Mus musculus OX=10090 GN=Hist3h2a PE=1 SV=3
504	1166	Q6GSS7|H2A2A_MOUSE	75.72	22	22	22	18900000	22100000	2	2	2	2		14095	Histone H2A type 2-A OS=Mus musculus OX=10090 GN=Hist2h2aa1 PE=1 SV=3
504	1181	P27661|H2AX_MOUSE	75.72	20	20	20	18900000	22100000	2	2	2	2		15143	Histone H2AX OS=Mus musculus OX=10090 GN=H2afx PE=1 SV=2
684	1088	tr|A0A0G2JEP8|A0A0G2JEP8_MOUSE	75.63	21	9	21	7740000	12000000	2	2	1	2	Carbamidomethylation	13261	Rho-related GTP-binding protein RhoC (Fragment) OS=Mus musculus OX=10090 GN=Rhoc PE=1 SV=1
684	1089	tr|H3BL56|H3BL56_MOUSE	75.63	17	7	17	7740000	12000000	2	2	1	2	Carbamidomethylation	17051	Rho-related GTP-binding protein RhoC OS=Mus musculus OX=10090 GN=Rhoc PE=1 SV=1
684	1090	tr|A0A0A6YXF6|A0A0A6YXF6_MOUSE	75.63	15	7	15	7740000	12000000	2	2	1	2	Carbamidomethylation	18710	Transforming protein RhoA (Fragment) OS=Mus musculus OX=10090 GN=Rhoa PE=1 SV=1
684	1092	Q62159|RHOC_MOUSE	75.63	13	6	13	7740000	12000000	2	2	1	2	Carbamidomethylation	22006	Rho-related GTP-binding protein RhoC OS=Mus musculus OX=10090 GN=Rhoc PE=1 SV=2
684	1091	Q9QUI0|RHOA_MOUSE	75.63	13	6	13	7740000	12000000	2	2	1	2	Carbamidomethylation	21782	Transforming protein RhoA OS=Mus musculus OX=10090 GN=Rhoa PE=1 SV=1
599	1232	Q00623|APOA1_MOUSE	75.46	8	8	8	3090000	2970000	2	2	2	2		30616	Apolipoprotein A-I OS=Mus musculus OX=10090 GN=Apoa1 PE=1 SV=2
704	1257	tr|B8JKK2|B8JKK2_MOUSE	75.26	21	15	21	608000	2040000	2	2	1	2		12650	Ribosomal protein L15 (Fragment) OS=Mus musculus OX=10090 GN=Rpl15 PE=1 SV=1
704	1270	Q9CZM2|RL15_MOUSE	75.26	11	8	11	608000	2040000	2	2	1	2		24146	60S ribosomal protein L15 OS=Mus musculus OX=10090 GN=Rpl15 PE=1 SV=4
691	1134	tr|D3YU15|D3YU15_MOUSE	75.13	11	5	11	1180000	4120000	2	2	1	2		20241	Dimethylarginine dimethylaminohydrolase 1 isoform CRA_a OS=Mus musculus OX=10090 GN=Ddah1 PE=1 SV=1
691	1141	Q9CWS0|DDAH1_MOUSE	75.13	7	4	7	1180000	4120000	2	2	1	2		31381	N(G) N(G)-dimethylarginine dimethylaminohydrolase 1 OS=Mus musculus OX=10090 GN=Ddah1 PE=1 SV=3
598	1229	Q9R0Q6|ARC1A_MOUSE	74.8	5	5	5	3270000	3900000	2	2	2	2	Carbamidomethylation	41626	Actin-related protein 2/3 complex subunit 1A OS=Mus musculus OX=10090 GN=Arpc1a PE=1 SV=1
418	932	tr|D3YX34|D3YX34_MOUSE	73.98	2	1	2	278000	653000	2	2	1	2		126821	Dynactin subunit 1 OS=Mus musculus OX=10090 GN=Dctn1 PE=1 SV=1
418	933	tr|E9Q586|E9Q586_MOUSE	73.98	2	1	2	278000	653000	2	2	1	2		136848	Dynactin subunit 1 OS=Mus musculus OX=10090 GN=Dctn1 PE=1 SV=1
418	934	tr|E9Q3M3|E9Q3M3_MOUSE	73.98	2	1	2	278000	653000	2	2	1	2		139761	Dynactin subunit 1 OS=Mus musculus OX=10090 GN=Dctn1 PE=1 SV=1
418	935	O08788|DCTN1_MOUSE	73.98	2	1	2	278000	653000	2	2	1	2		141675	Dynactin subunit 1 OS=Mus musculus OX=10090 GN=Dctn1 PE=1 SV=3
593	1183	Q62095|DDX3Y_MOUSE	73.65	3	3	3	448000	466000	2	2	2	2		73428	ATP-dependent RNA helicase DDX3Y OS=Mus musculus OX=10090 GN=Ddx3y PE=1 SV=2
593	1184	P16381|DDX3L_MOUSE	73.65	3	3	3	448000	466000	2	2	2	2		73141	Putative ATP-dependent RNA helicase Pl10 OS=Mus musculus OX=10090 GN=D1Pas1 PE=1 SV=1
593	1185	Q62167|DDX3X_MOUSE	73.65	3	3	3	448000	466000	2	2	2	2		73102	ATP-dependent RNA helicase DDX3X OS=Mus musculus OX=10090 GN=Ddx3x PE=1 SV=3
575	980	Q99JY0|ECHB_MOUSE	73.61	4	4	2	1980000	1700000	2	2	2	1		51386	Trifunctional enzyme subunit beta mitochondrial OS=Mus musculus OX=10090 GN=Hadhb PE=1 SV=1
250	876	tr|A2AL12|A2AL12_MOUSE	73.4	9	9	9	1870000	2860000	3	2	5	5	Carbamidomethylation	34476	Heterogeneous nuclear ribonucleoprotein A3 OS=Mus musculus OX=10090 GN=Hnrnpa3 PE=1 SV=1
250	877	tr|B2RXM2|B2RXM2_MOUSE	73.4	8	8	8	1870000	2860000	3	2	5	5	Carbamidomethylation	36610	EG627828 protein OS=Mus musculus OX=10090 GN=Gm6793 PE=1 SV=1
250	878	Q8BG05|ROA3_MOUSE	73.4	7	7	7	1870000	2860000	3	2	5	5	Carbamidomethylation	39652	Heterogeneous nuclear ribonucleoprotein A3 OS=Mus musculus OX=10090 GN=Hnrnpa3 PE=1 SV=1
489	921	Q9JIS5|SV2A_MOUSE	73.21	3	2	3	4620000	9230000	2	2	1	3		82647	Synaptic vesicle glycoprotein 2A OS=Mus musculus OX=10090 GN=Sv2a PE=1 SV=1
591	1151	Q9D6J6|NDUV2_MOUSE	72.81	8	8	8	1100000	1040000	2	2	2	2		27285	NADH dehydrogenase [ubiquinone] flavoprotein 2 mitochondrial OS=Mus musculus OX=10090 GN=Ndufv2 PE=1 SV=2
700	1243	Q64433|CH10_MOUSE	72.74	21	21	7	1650000	2630000	2	2	2	1		10963	10 kDa heat shock protein mitochondrial OS=Mus musculus OX=10090 GN=Hspe1 PE=1 SV=2
589	1136	tr|Q6P6I8|Q6P6I8_MOUSE	72.7	4	4	4	2880000	6230000	2	2	2	2	Carbamidomethylation	55986	Signal-regulatory protein alpha OS=Mus musculus OX=10090 GN=Sirpa PE=1 SV=1
589	1137	P97797|SHPS1_MOUSE	72.7	4	4	4	2880000	6230000	2	2	2	2	Carbamidomethylation	56414	Tyrosine-protein phosphatase non-receptor type substrate 1 OS=Mus musculus OX=10090 GN=Sirpa PE=1 SV=2
755	1744	tr|A2AUE1|A2AUE1_MOUSE	70.86	12	11	12	0	1910000	2	2	1	2		15819	DnaJ homolog subfamily C member 5 (Fragment) OS=Mus musculus OX=10090 GN=Dnajc5 PE=1 SV=1
755	1745	tr|G5E8T0|G5E8T0_MOUSE	70.86	10	9	10	0	1910000	2	2	1	2		18753	DnaJ (Hsp40) homolog subfamily C member 5 isoform CRA_b OS=Mus musculus OX=10090 GN=Dnajc5 PE=1 SV=1
755	1746	P60904|DNJC5_MOUSE	70.86	9	8	9	0	1910000	2	2	1	2		22101	DnaJ homolog subfamily C member 5 OS=Mus musculus OX=10090 GN=Dnajc5 PE=1 SV=1
590	1143	Q63912|OMGP_MOUSE	70.59	5	5	5	5170000	4580000	2	2	2	2		49284	Oligodendrocyte-myelin glycoprotein OS=Mus musculus OX=10090 GN=Omg PE=1 SV=1
590	1144	tr|G3XA53|G3XA53_MOUSE	70.59	5	5	5	5170000	4580000	2	2	2	2		49599	Oligodendrocyte-myelin glycoprotein OS=Mus musculus OX=10090 GN=Omg PE=1 SV=1
702	1247	Q99020|ROAA_MOUSE	70.27	7	3	7	120000	279000	2	2	1	2		30831	Heterogeneous nuclear ribonucleoprotein A/B OS=Mus musculus OX=10090 GN=Hnrnpab PE=1 SV=1
702	1248	tr|Q80XR6|Q80XR6_MOUSE	70.27	7	3	7	120000	279000	2	2	1	2		33816	Heterogeneous nuclear ribonucleoprotein A/B OS=Mus musculus OX=10090 GN=Hnrnpab PE=1 SV=1
702	1250	tr|Q20BD0|Q20BD0_MOUSE	70.27	6	2	6	120000	279000	2	2	1	2		36211	Heterogeneous nuclear ribonucleoprotein A/B OS=Mus musculus OX=10090 GN=Hnrnpab PE=1 SV=1
472	840	P68404|KPCB_MOUSE	69.72	4	2	4	2290000	4200000	3	2	2	3	Carbamidomethylation	76751	Protein kinase C beta type OS=Mus musculus OX=10090 GN=Prkcb PE=1 SV=4
696	1211	P70202|LXN_MOUSE	69.34	14	14	5	1380000	1590000	2	2	2	1	Carbamidomethylation	25492	Latexin OS=Mus musculus OX=10090 GN=Lxn PE=1 SV=2
692	1146	Q5PR73|DIRA2_MOUSE	69.32	12	12	6	1890000	536000	2	2	2	1		22498	GTP-binding protein Di-Ras2 OS=Mus musculus OX=10090 GN=Diras2 PE=1 SV=1
718	1421	P61161|ARP2_MOUSE	69.05	5	2	5	0	3360000	2	2	1	2	Carbamidomethylation	44761	Actin-related protein 2 OS=Mus musculus OX=10090 GN=Actr2 PE=1 SV=1
694	1157	P63323|RS12_MOUSE	69.04	14	14	8	752000	937000	2	2	2	1	Carbamidomethylation	14525	40S ribosomal protein S12 OS=Mus musculus OX=10090 GN=Rps12 PE=1 SV=2
694	1156	tr|Q6ZWZ6|Q6ZWZ6_MOUSE	69.04	14	14	8	752000	937000	2	2	2	1	Carbamidomethylation	14515	40S ribosomal protein S12 OS=Mus musculus OX=10090 GN=Rps12-ps3 PE=1 SV=1
694	1159	tr|F7AEH4|F7AEH4_MOUSE	69.04	14	14	7	752000	937000	2	2	2	1	Carbamidomethylation	15181	40S ribosomal protein S12 OS=Mus musculus OX=10090 GN=Rps12 PE=1 SV=1
694	1180	tr|A0A1W2P7A1|A0A1W2P7A1_MOUSE	69.04	13	13	7	752000	937000	2	2	2	1	Carbamidomethylation	15979	40S ribosomal protein S12 OS=Mus musculus OX=10090 GN=Rps12 PE=1 SV=1
596	1200	Q8K3J1|NDUS8_MOUSE	68.99	9	9	9	4460000	5010000	2	2	2	2		24038	NADH dehydrogenase [ubiquinone] iron-sulfur protein 8 mitochondrial OS=Mus musculus OX=10090 GN=Ndufs8 PE=1 SV=1
695	1207	tr|D3Z1U9|D3Z1U9_MOUSE	68.31	5	5	2	6490000	4570000	2	2	2	1		41834	NADH dehydrogenase [ubiquinone] flavoprotein 1 mitochondrial OS=Mus musculus OX=10090 GN=Ndufv1 PE=1 SV=1
695	1210	tr|D3YUM1|D3YUM1_MOUSE	68.31	4	4	2	6490000	4570000	2	2	2	1		49913	NADH dehydrogenase [ubiquinone] flavoprotein 1 mitochondrial OS=Mus musculus OX=10090 GN=Ndufv1 PE=1 SV=1
695	1212	Q91YT0|NDUV1_MOUSE	68.31	4	4	2	6490000	4570000	2	2	2	1		50834	NADH dehydrogenase [ubiquinone] flavoprotein 1 mitochondrial OS=Mus musculus OX=10090 GN=Ndufv1 PE=1 SV=1
506	1311	Q9D0K2|SCOT1_MOUSE	68.31	4	2	4	3950000	5930000	2	2	2	3		55989	Succinyl-CoA:3-ketoacid coenzyme A transferase 1 mitochondrial OS=Mus musculus OX=10090 GN=Oxct1 PE=1 SV=1
863	1320	tr|A0A338P702|A0A338P702_MOUSE	68.22	21	8	13	0	1160000	2	2	1	1		13173	Ubiquitin-conjugating enzyme E2 L3 OS=Mus musculus OX=10090 GN=Ube2l3 PE=1 SV=1
863	1321	tr|A0A338P7E5|A0A338P7E5_MOUSE	68.22	20	7	12	0	1160000	2	2	1	1		14121	Ubiquitin-conjugating enzyme E2 L3 OS=Mus musculus OX=10090 GN=Ube2l3 PE=1 SV=1
863	1322	tr|A0A338P786|A0A338P786_MOUSE	68.22	16	6	10	0	1160000	2	2	1	1		16940	Ubiquitin-conjugating enzyme E2 L3 (Fragment) OS=Mus musculus OX=10090 GN=Ube2l3 PE=1 SV=1
863	1323	P68037|UB2L3_MOUSE	68.22	16	6	10	0	1160000	2	2	1	1		17862	Ubiquitin-conjugating enzyme E2 L3 OS=Mus musculus OX=10090 GN=Ube2l3 PE=1 SV=1
595	1191	tr|A0A2I3BR94|A0A2I3BR94_MOUSE	67.74	15	15	15	2680000	3500000	2	2	2	2		15916	Glia maturation factor beta (Fragment) OS=Mus musculus OX=10090 GN=Gmfb PE=1 SV=1
595	1192	Q9CQI3|GMFB_MOUSE	67.74	14	14	14	2680000	3500000	2	2	2	2		16723	Glia maturation factor beta OS=Mus musculus OX=10090 GN=Gmfb PE=1 SV=3
595	1193	tr|A0A2I3BPS1|A0A2I3BPS1_MOUSE	67.74	13	13	13	2680000	3500000	2	2	2	2		18377	Glia maturation factor beta (Fragment) OS=Mus musculus OX=10090 GN=Gmfb PE=1 SV=1
495	977	Q99L43|CDS2_MOUSE	67.18	6	6	6	861000	940000	2	2	2	2		51314	Phosphatidate cytidylyltransferase 2 OS=Mus musculus OX=10090 GN=Cds2 PE=1 SV=1
699	1236	P62264|RS14_MOUSE	66.89	16	16	7	2660000	2080000	2	2	2	1		16273	40S ribosomal protein S14 OS=Mus musculus OX=10090 GN=Rps14 PE=1 SV=3
864	1348	P32921|SYWC_MOUSE	66.88	6	0	6		563000	2	2	0	2	Carbamidomethylation	54358	Tryptophan--tRNA ligase cytoplasmic OS=Mus musculus OX=10090 GN=Wars PE=1 SV=2
728	924	O55234|PSB5_MOUSE	66.68	8	5	8	1300000	1210000	2	2	1	2		28532	Proteasome subunit beta type-5 OS=Mus musculus OX=10090 GN=Psmb5 PE=1 SV=3
717	1419	tr|F8WJK8|F8WJK8_MOUSE	66.6	6	6	2	2050000	1510000	2	2	2	1		40539	Hsc70-interacting protein OS=Mus musculus OX=10090 GN=St13 PE=1 SV=1
717	1420	Q99L47|F10A1_MOUSE	66.6	5	5	2	2050000	1510000	2	2	2	1		41656	Hsc70-interacting protein OS=Mus musculus OX=10090 GN=St13 PE=1 SV=1
574	975	Q62418|DBNL_MOUSE	66.18	5	5	3	662000	376000	2	2	2	1		48700	Drebrin-like protein OS=Mus musculus OX=10090 GN=Dbnl PE=1 SV=2
505	1228	tr|G3UYZ1|G3UYZ1_MOUSE	65.81	3	3	3	1960000	7820000	2	2	2	2		58132	Immunoglobulin superfamily member 8 OS=Mus musculus OX=10090 GN=Igsf8 PE=1 SV=1
505	1231	Q8R366|IGSF8_MOUSE	65.81	3	3	3	1960000	7820000	2	2	2	2		65011	Immunoglobulin superfamily member 8 OS=Mus musculus OX=10090 GN=Igsf8 PE=1 SV=2
505	1230	tr|A0A0R4J117|A0A0R4J117_MOUSE	65.81	3	3	3	1960000	7820000	2	2	2	2		65006	Immunoglobulin superfamily member 8 OS=Mus musculus OX=10090 GN=Igsf8 PE=1 SV=1
597	1226	Q8BLE7|VGLU2_MOUSE	65.75	3	3	3	4390000	4610000	2	2	2	2	Carbamidomethylation	64561	Vesicular glutamate transporter 2 OS=Mus musculus OX=10090 GN=Slc17a6 PE=1 SV=1
597	1225	tr|A0A0R4J0A6|A0A0R4J0A6_MOUSE	65.75	3	3	3	4390000	4610000	2	2	2	2	Carbamidomethylation	64560	Solute carrier family 17 (Sodium-dependent inorganic phosphate cotransporter) member 6 isoform CRA_a OS=Mus musculus OX=10090 GN=Slc17a6 PE=1 SV=1
497	1007	P48771|CX7A2_MOUSE	65.22	22	22	22	7660000	11200000	2	2	2	2		9291	Cytochrome c oxidase subunit 7A2 mitochondrial OS=Mus musculus OX=10090 GN=Cox7a2 PE=1 SV=2
603	1261	Q9ER00|STX12_MOUSE	65.06	7	7	7	518000	965000	2	2	2	2		31195	Syntaxin-12 OS=Mus musculus OX=10090 GN=Stx12 PE=1 SV=1
414	880	tr|F8WIT2|F8WIT2_MOUSE	64.06	5	5	5	1530000	1780000	3	2	3	3		75289	Annexin OS=Mus musculus OX=10090 GN=Anxa6 PE=1 SV=1
414	881	P14824|ANXA6_MOUSE	64.06	5	5	5	1530000	1780000	3	2	3	3		75885	Annexin A6 OS=Mus musculus OX=10090 GN=Anxa6 PE=1 SV=3
600	1237	P42669|PURA_MOUSE	63.97	5	5	5	5250000	5780000	2	2	2	2		34884	Transcriptional activator protein Pur-alpha OS=Mus musculus OX=10090 GN=Pura PE=1 SV=1
709	1305	O35136|NCAM2_MOUSE	63.81	2	1	2	96800	1860000	2	2	1	2	Carbamidomethylation	93204	Neural cell adhesion molecule 2 OS=Mus musculus OX=10090 GN=Ncam2 PE=1 SV=1
698	1235	tr|A2A6U5|A2A6U5_MOUSE	62.47	8	4	8	1140000	1990000	2	2	1	2		27598	Septin-9 (Fragment) OS=Mus musculus OX=10090 GN=Sept9 PE=1 SV=1
698	1241	tr|A2A6U3|A2A6U3_MOUSE	62.47	3	2	3	1140000	1990000	2	2	1	2		63773	Septin-9 OS=Mus musculus OX=10090 GN=Sept9 PE=1 SV=1
698	1242	Q80UG5|SEPT9_MOUSE	62.47	3	2	3	1140000	1990000	2	2	1	2		65575	Septin-9 OS=Mus musculus OX=10090 GN=Sept9 PE=1 SV=1
569	942	P46471|PRS7_MOUSE	61.8	5	5	3	959000	1120000	2	2	2	1		48648	26S proteasome regulatory subunit 7 OS=Mus musculus OX=10090 GN=Psmc2 PE=1 SV=5
569	943	tr|Q8BVQ9|Q8BVQ9_MOUSE	61.8	5	5	3	959000	1120000	2	2	2	1		52867	26S proteasome regulatory subunit 7 OS=Mus musculus OX=10090 GN=Psmc2 PE=1 SV=1
563	858	Q9Z2I0|LETM1_MOUSE	61.65	4	3	2	713000	864000	3	2	2	2		82989	Mitochondrial proton/calcium exchanger protein OS=Mus musculus OX=10090 GN=Letm1 PE=1 SV=1
580	1017	Q9D023|MPC2_MOUSE	61.44	12	6	12	15500000	1560000	2	2	1	2		14286	Mitochondrial pyruvate carrier 2 OS=Mus musculus OX=10090 GN=Mpc2 PE=1 SV=1
490	925	Q9CQ54|NDUC2_MOUSE	61.4	16	16	16	4470000	6490000	2	2	2	2		14164	NADH dehydrogenase [ubiquinone] 1 subunit C2 OS=Mus musculus OX=10090 GN=Ndufc2 PE=1 SV=1
602	1258	Q8K212|PACS1_MOUSE	61.14	2	2	2	825000	886000	2	2	2	2		104829	Phosphofurin acidic cluster sorting protein 1 OS=Mus musculus OX=10090 GN=Pacs1 PE=1 SV=2
860	1238	tr|A2A4X6|A2A4X6_MOUSE	61.12	16	9	7	281000	11500000	2	2	1	1	Deamidation N	19130	MCG21910 OS=Mus musculus OX=10090 GN=Gm12355 PE=4 SV=1
860	1239	P84104|SRSF3_MOUSE	61.12	16	9	7	281000	11500000	2	2	1	1	Deamidation N	19330	Serine/arginine-rich splicing factor 3 OS=Mus musculus OX=10090 GN=Srsf3 PE=1 SV=1
601	1245	tr|A0A0R4J2B2|A0A0R4J2B2_MOUSE	61.02	7	7	7	401000	730000	2	2	2	2		35888	BTB/POZ domain-containing protein KCTD12 OS=Mus musculus OX=10090 GN=Kctd12 PE=1 SV=1
601	1244	Q6WVG3|KCD12_MOUSE	61.02	7	7	7	401000	730000	2	2	2	2		35892	BTB/POZ domain-containing protein KCTD12 OS=Mus musculus OX=10090 GN=Kctd12 PE=1 SV=1
510	1398	tr|A0A0N4SVT3|A0A0N4SVT3_MOUSE	60.76	28	28	17	3160000	2170000	2	2	3	2	Deamidation N	7197	Guanine nucleotide-binding protein subunit gamma (Fragment) OS=Mus musculus OX=10090 GN=Gng12 PE=1 SV=1
510	1399	Q9DAS9|GBG12_MOUSE	60.76	25	25	15	3160000	2170000	2	2	3	2	Deamidation N	7997	Guanine nucleotide-binding protein G(I)/G(S)/G(O) subunit gamma-12 OS=Mus musculus OX=10090 GN=Gng12 PE=1 SV=3
510	1400	tr|A0A0N4SW28|A0A0N4SW28_MOUSE	60.76	22	22	13	3160000	2170000	2	2	3	2	Deamidation N	9182	Guanine nucleotide-binding protein subunit gamma OS=Mus musculus OX=10090 GN=Gng12 PE=1 SV=1
573	974	P09103|PDIA1_MOUSE	60.19	4	4	2	765000	632000	2	2	2	1		57059	Protein disulfide-isomerase OS=Mus musculus OX=10090 GN=P4hb PE=1 SV=2
606	1294	Q8BGH2|SAM50_MOUSE	59.93	4	4	4	1300000	1980000	2	2	2	2		51864	Sorting and assembly machinery component 50 homolog OS=Mus musculus OX=10090 GN=Samm50 PE=1 SV=1
701	1246	P08226|APOE_MOUSE	59.9	7	7	3	2540000	1030000	2	2	2	1		35867	Apolipoprotein E OS=Mus musculus OX=10090 GN=Apoe PE=1 SV=2
608	1316	Q62048|PEA15_MOUSE	58.88	16	16	16	2260000	3150000	2	2	2	2	Carbamidomethylation	15054	Astrocytic phosphoprotein PEA-15 OS=Mus musculus OX=10090 GN=Pea15 PE=1 SV=1
705	1264	Q9Z2U0|PSA7_MOUSE	57.73	8	8	4	4270000	1960000	2	2	2	1		27855	Proteasome subunit alpha type-7 OS=Mus musculus OX=10090 GN=Psma7 PE=1 SV=1
716	1391	Q9D394|RUFY3_MOUSE	57.72	5	5	2	587000	529000	2	2	2	1		53007	Protein RUFY3 OS=Mus musculus OX=10090 GN=Rufy3 PE=1 SV=1
716	1393	tr|A0A0G2JFT8|A0A0G2JFT8_MOUSE	57.72	4	4	2	587000	529000	2	2	2	1		74770	Protein RUFY3 OS=Mus musculus OX=10090 GN=Rufy3 PE=1 SV=1
871	1414	tr|A0A0N4SVB8|A0A0N4SVB8_MOUSE	57.05	17	0	17		1230000	2	2	0	2	Carbamidomethylation	15986	ADP-ribosylation factor-like protein 8B OS=Mus musculus OX=10090 GN=Arl8b PE=1 SV=1
871	1415	tr|F6QKK2|F6QKK2_MOUSE	57.05	15	0	15		1230000	2	2	0	2	Carbamidomethylation	18875	ADP-ribosylation factor-like protein 8A (Fragment) OS=Mus musculus OX=10090 GN=Arl8a PE=1 SV=1
871	1417	Q9CQW2|ARL8B_MOUSE	57.05	13	0	13		1230000	2	2	0	2	Carbamidomethylation	21539	ADP-ribosylation factor-like protein 8B OS=Mus musculus OX=10090 GN=Arl8b PE=1 SV=1
871	1416	Q8VEH3|ARL8A_MOUSE	57.05	13	0	13		1230000	2	2	0	2	Carbamidomethylation	21390	ADP-ribosylation factor-like protein 8A OS=Mus musculus OX=10090 GN=Arl8a PE=1 SV=1
711	1354	Q61361|PGCB_MOUSE	56.69	3	1	3	0	1620000	2	2	1	2	Carbamidomethylation; Deamidation N	95815	Brevican core protein OS=Mus musculus OX=10090 GN=Bcan PE=1 SV=2
712	1356	tr|B1ARA3|B1ARA3_MOUSE	56.56	17	17	8	2420000	1960000	2	2	2	1		12217	60S ribosomal protein L26 (Fragment) OS=Mus musculus OX=10090 GN=Rpl26 PE=1 SV=1
712	1357	P61255|RL26_MOUSE	56.56	12	12	6	2420000	1960000	2	2	2	1		17258	60S ribosomal protein L26 OS=Mus musculus OX=10090 GN=Rpl26 PE=1 SV=1
371	1011	O88643|PAK1_MOUSE	55.38	4	4	2	2990000	1430000	2	2	2	1		60737	Serine/threonine-protein kinase PAK 1 OS=Mus musculus OX=10090 GN=Pak1 PE=1 SV=1
576	982	tr|D3Z5I7|D3Z5I7_MOUSE	54.93	2	1	2	0	658000	2	2	1	2		89991	Inactive dipeptidyl peptidase 10 OS=Mus musculus OX=10090 GN=Dpp10 PE=1 SV=2
576	983	Q6NXK7|DPP10_MOUSE	54.93	2	1	2	0	658000	2	2	1	2		90827	Inactive dipeptidyl peptidase 10 OS=Mus musculus OX=10090 GN=Dpp10 PE=1 SV=1
576	984	tr|E9QN98|E9QN98_MOUSE	54.93	2	1	2	0	658000	2	2	1	2		91130	Inactive dipeptidyl peptidase 10 OS=Mus musculus OX=10090 GN=Dpp10 PE=1 SV=1
708	1297	P55066|NCAN_MOUSE	54.01	2	2	1	468000	2000000	2	2	2	1	Carbamidomethylation	137200	Neurocan core protein OS=Mus musculus OX=10090 GN=Ncan PE=1 SV=1
708	1296	tr|A0A0R4IZX5|A0A0R4IZX5_MOUSE	54.01	2	2	1	468000	2000000	2	2	2	1	Carbamidomethylation	137175	Neurocan core protein OS=Mus musculus OX=10090 GN=Ncan PE=1 SV=1
713	1371	P54227|STMN1_MOUSE	53.99	15	7	8	250000	492000	2	2	1	1	Deamidation N	17274	Stathmin OS=Mus musculus OX=10090 GN=Stmn1 PE=1 SV=2
730	1459	tr|A0A1B0GT66|A0A1B0GT66_MOUSE	53.47	7	4	7	1950000	1910000	2	2	1	2		29418	Predicted gene 49369 (Fragment) OS=Mus musculus OX=10090 GN=Gm49369 PE=1 SV=1
730	1460	tr|F6Y6L6|F6Y6L6_MOUSE	53.47	7	4	7	1950000	1910000	2	2	1	2		29961	Predicted gene 49369 (Fragment) OS=Mus musculus OX=10090 GN=Gm49369 PE=1 SV=1
730	1461	tr|F8WIR1|F8WIR1_MOUSE	53.47	5	2	5	1950000	1910000	2	2	1	2		44215	Cathepsin D OS=Mus musculus OX=10090 GN=Ctsd PE=1 SV=2
730	1462	P18242|CATD_MOUSE	53.47	5	2	5	1950000	1910000	2	2	1	2		44954	Cathepsin D OS=Mus musculus OX=10090 GN=Ctsd PE=1 SV=1
614	1386	Q9DC70|NDUS7_MOUSE	53.12	7	7	7	4430000	6510000	2	2	2	2		24683	NADH dehydrogenase [ubiquinone] iron-sulfur protein 7 mitochondrial OS=Mus musculus OX=10090 GN=Ndufs7 PE=1 SV=1
862	1313	Q9D1A2|CNDP2_MOUSE	53.05	6	0	6		1050000	2	2	0	2		52767	Cytosolic non-specific dipeptidase OS=Mus musculus OX=10090 GN=Cndp2 PE=1 SV=1
607	1308	P11404|FABPH_MOUSE	52.92	17	17	17	5410000	4890000	2	2	2	2		14819	Fatty acid-binding protein heart OS=Mus musculus OX=10090 GN=Fabp3 PE=1 SV=5
498	1018	P50247|SAHH_MOUSE	52.16	4	4	4	2160000	2410000	2	2	2	2		47688	Adenosylhomocysteinase OS=Mus musculus OX=10090 GN=Ahcy PE=1 SV=3
612	1345	tr|Q9D9P1|Q9D9P1_MOUSE	52.12	10	5	10	0	54800	2	2	1	2		20376	MICOS complex subunit OS=Mus musculus OX=10090 GN=Chchd3 PE=1 SV=1
612	1347	tr|D3Z0L4|D3Z0L4_MOUSE	52.12	9	4	9	0	54800	2	2	1	2		22452	MICOS complex subunit (Fragment) OS=Mus musculus OX=10090 GN=Chchd3 PE=1 SV=1
612	1350	Q9CRB9|MIC19_MOUSE	52.12	7	4	7	0	54800	2	2	1	2		26335	MICOS complex subunit Mic19 OS=Mus musculus OX=10090 GN=Chchd3 PE=1 SV=1
611	1336	tr|A0A1L1SQA8|A0A1L1SQA8_MOUSE	51.16	20	10	20	2280000	3700000	2	2	1	2		10309	40S ribosomal protein S25 OS=Mus musculus OX=10090 GN=Rps25 PE=1 SV=1
611	1338	P62852|RS25_MOUSE	51.16	15	7	15	2280000	3700000	2	2	1	2		13742	40S ribosomal protein S25 OS=Mus musculus OX=10090 GN=Rps25 PE=1 SV=1
866	1373	Q6IRU5|CLCB_MOUSE	50.56	9	9	0	216000		2	2	2	0		25172	Clathrin light chain B OS=Mus musculus OX=10090 GN=Cltb PE=1 SV=1
610	1334	tr|A0A0U1RNR3|A0A0U1RNR3_MOUSE	50.3	10	10	10	2830000	2900000	2	2	2	2		19202	Electron transfer flavoprotein subunit beta (Fragment) OS=Mus musculus OX=10090 GN=Etfb PE=4 SV=2
610	1337	tr|A0A0U1RNP5|A0A0U1RNP5_MOUSE	50.3	8	8	8	2830000	2900000	2	2	2	2		23481	Electron transfer flavoprotein subunit beta (Fragment) OS=Mus musculus OX=10090 GN=Etfb PE=4 SV=1
610	1339	tr|A0A0N4SVE0|A0A0N4SVE0_MOUSE	50.3	8	8	8	2830000	2900000	2	2	2	2		24125	Electron transferring flavoprotein beta polypeptide-like OS=Mus musculus OX=10090 GN=Etfbl PE=4 SV=1
610	1341	Q9DCW4|ETFB_MOUSE	50.3	7	7	7	2830000	2900000	2	2	2	2		27623	Electron transfer flavoprotein subunit beta OS=Mus musculus OX=10090 GN=Etfb PE=1 SV=3
868	1387	P32067|LA_MOUSE	50.2	6	0	6		0	2	2	0	2		47756	Lupus La protein homolog OS=Mus musculus OX=10090 GN=Ssb PE=1 SV=1
865	1351	P35979|RL12_MOUSE	48.81	15	9	5	186000	2380000	2	2	1	1	Carbamidomethylation	17805	60S ribosomal protein L12 OS=Mus musculus OX=10090 GN=Rpl12 PE=1 SV=2
613	1372	Q9R1P1|PSB3_MOUSE	48.67	8	8	8	1620000	1660000	2	2	2	2	Carbamidomethylation	22965	Proteasome subunit beta type-3 OS=Mus musculus OX=10090 GN=Psmb3 PE=1 SV=1
421	995	Q8CGF6|WDR47_MOUSE	47.74	2	2	1	602000	136000	2	2	2	1		102312	WD repeat-containing protein 47 OS=Mus musculus OX=10090 GN=Wdr47 PE=1 SV=2
869	1390	Q9Z204|HNRPC_MOUSE	44.45	7	4	3	337000	1540000	2	2	1	1		34385	Heterogeneous nuclear ribonucleoproteins C1/C2 OS=Mus musculus OX=10090 GN=Hnrnpc PE=1 SV=1
729	1452	tr|E9Q6A9|E9Q6A9_MOUSE	43.43	2	2	1	1030000	675000	2	2	2	1		66562	Catenin beta-1 OS=Mus musculus OX=10090 GN=Ctnnb1 PE=1 SV=1
729	1457	Q02248|CTNB1_MOUSE	43.43	2	2	1	1030000	675000	2	2	2	1		85471	Catenin beta-1 OS=Mus musculus OX=10090 GN=Ctnnb1 PE=1 SV=1
719	1422	P45376|ALDR_MOUSE	42.98	5	2	5	1620000	2120000	2	2	1	2		35732	Aldo-keto reductase family 1 member B1 OS=Mus musculus OX=10090 GN=Akr1b1 PE=1 SV=3
615	1401	tr|E0CZ27|E0CZ27_MOUSE	41.9	12	12	12	14200000	14000000	2	2	2	2		13322	Histone H3 (Fragment) OS=Mus musculus OX=10090 GN=H3f3a PE=3 SV=1
615	1403	tr|F8WI35|F8WI35_MOUSE	41.9	10	10	10	14200000	14000000	2	2	2	2		15199	Histone H3 OS=Mus musculus OX=10090 GN=H3f3a PE=1 SV=1
615	1408	P84228|H32_MOUSE	41.9	10	10	10	14200000	14000000	2	2	2	2		15388	Histone H3.2 OS=Mus musculus OX=10090 GN=Hist1h3b PE=1 SV=2
615	1407	P02301|H3C_MOUSE	41.9	10	10	10	14200000	14000000	2	2	2	2		15315	Histone H3.3C OS=Mus musculus OX=10090 GN=H3f3c PE=3 SV=3
615	1406	P84244|H33_MOUSE	41.9	10	10	10	14200000	14000000	2	2	2	2		15328	Histone H3.3 OS=Mus musculus OX=10090 GN=H3f3a PE=1 SV=2
615	1405	P68433|H31_MOUSE	41.9	10	10	10	14200000	14000000	2	2	2	2		15404	Histone H3.1 OS=Mus musculus OX=10090 GN=Hist1h3a PE=1 SV=2
615	1409	tr|A0A1W2P768|A0A1W2P768_MOUSE	41.9	8	8	8	14200000	14000000	2	2	2	2		20247	Histone H3.2 OS=Mus musculus OX=10090 GN=Hist2h3c1 PE=1 SV=1
870	1402	P20108|PRDX3_MOUSE	41.43	7	0	7		3840000	2	2	0	2		28127	Thioredoxin-dependent peroxide reductase mitochondrial OS=Mus musculus OX=10090 GN=Prdx3 PE=1 SV=1
579	993	tr|A0A1D5RMH7|A0A1D5RMH7_MOUSE	41.23	1	0	1		2530000	2	2	0	2		142027	PH and SEC7 domain-containing protein 3 OS=Mus musculus OX=10090 GN=Psd3 PE=1 SV=1
721	1427	P49722|PSA2_MOUSE	40.03	8	8	3	842000	1440000	2	2	2	1		25927	Proteasome subunit alpha type-2 OS=Mus musculus OX=10090 GN=Psma2 PE=1 SV=3
725	1439	P0DN34|NDUB1_MOUSE	36.27	32	12	32	1330000	2920000	2	2	1	2		6954	NADH dehydrogenase [ubiquinone] 1 beta subcomplex subunit 1 OS=Mus musculus OX=10090 GN=Ndufb1 PE=1 SV=1
726	1445	Q3UNH4|GRIN1_MOUSE	35.43	2	1	2	930000	702000	2	2	1	2		95496	G protein-regulated inducer of neurite outgrowth 1 OS=Mus musculus OX=10090 GN=Gprin1 PE=1 SV=2
727	1446	P31938|MP2K1_MOUSE	35.33	5	2	5	2260000	5520000	2	2	1	2		43474	Dual specificity mitogen-activated protein kinase kinase 1 OS=Mus musculus OX=10090 GN=Map2k1 PE=1 SV=2
727	1447	tr|Q91YS7|Q91YS7_MOUSE	35.33	4	2	4	2260000	5520000	2	2	1	2		44303	Dual-specificity mitogen-activated protein kinase kinase 2 OS=Mus musculus OX=10090 GN=Map2k2 PE=1 SV=1
727	1448	Q63932|MP2K2_MOUSE	35.33	4	2	4	2260000	5520000	2	2	1	2		44402	Dual specificity mitogen-activated protein kinase kinase 2 OS=Mus musculus OX=10090 GN=Map2k2 PE=1 SV=2
724	1433	Q9JME5|AP3B2_MOUSE	33.79	2	0	2		269000	2	2	0	2		119192	AP-3 complex subunit beta-2 OS=Mus musculus OX=10090 GN=Ap3b2 PE=1 SV=2
873	1476	P26638|SYSC_MOUSE	33.73	3	1	2	1710000	444000	2	2	1	1		58389	Serine--tRNA ligase cytoplasmic OS=Mus musculus OX=10090 GN=Sars PE=1 SV=3
873	1477	tr|Q8C483|Q8C483_MOUSE	33.73	3	1	1	1710000	444000	2	2	1	1		61167	Serine--tRNA ligase cytoplasmic OS=Mus musculus OX=10090 GN=Sars PE=1 SV=1
752	1577	tr|A0A1L1SVK0|A0A1L1SVK0_MOUSE	32.44	14	5	14	1070000	1680000	2	2	1	2	Deamidation N	22056	Platelet-activating factor acetylhydrolase IB subunit beta (Fragment) OS=Mus musculus OX=10090 GN=Pafah1b2 PE=1 SV=1
752	1578	Q61206|PA1B2_MOUSE	32.44	12	4	12	1070000	1680000	2	2	1	2	Deamidation N	25581	Platelet-activating factor acetylhydrolase IB subunit beta OS=Mus musculus OX=10090 GN=Pafah1b2 PE=1 SV=2
731	1471	tr|E9Q1X8|E9Q1X8_MOUSE	31.21	2	2	0	1140000		2	2	2	0		123206	Voltage-dependent calcium channel subunit alpha-2/delta-1 OS=Mus musculus OX=10090 GN=Cacna2d1 PE=1 SV=2
731	1472	O08532|CA2D1_MOUSE	31.21	2	2	0	1140000		2	2	2	0		124630	Voltage-dependent calcium channel subunit alpha-2/delta-1 OS=Mus musculus OX=10090 GN=Cacna2d1 PE=1 SV=1
4	14	Q7TMM9|TBB2A_MOUSE	283.17	53	45	53	58900000	65400000	25	1	54	57	Carbamidomethylation; Deamidation N; Oxidation (M); HexNac	49907	Tubulin beta-2A chain OS=Mus musculus OX=10090 GN=Tubb2a PE=1 SV=1
5	10	P68372|TBB4B_MOUSE	282.83	55	51	55	29300000	30400000	27	1	53	56	Carbamidomethylation; Deamidation N; Oxidation (M); HexNac	49831	Tubulin beta-4B chain OS=Mus musculus OX=10090 GN=Tubb4b PE=1 SV=1
8	15	Q9CWF2|TBB2B_MOUSE	282.75	53	45	53	10500000	9320000	25	1	52	55	Carbamidomethylation; Deamidation N; Oxidation (M); HexNac	49953	Tubulin beta-2B chain OS=Mus musculus OX=10090 GN=Tubb2b PE=1 SV=1
3	16	P68369|TBA1A_MOUSE	266.69	51	48	49	421000	417000	24	1	54	57	Carbamidomethylation; Deamidation N	50136	Tubulin alpha-1A chain OS=Mus musculus OX=10090 GN=Tuba1a PE=1 SV=1
84	59	tr|A0A0A6YY91|A0A0A6YY91_MOUSE	187.57	14	12	12	1250000	819000	12	1	11	12	Carbamidomethylation; Phosphoserine (pS)	116375	Neural cell adhesion molecule 1 (Fragment) OS=Mus musculus OX=10090 GN=Ncam1 PE=1 SV=1
37	161	P68134|ACTS_MOUSE	178.66	29	25	28		0	13	1	27	26	Oxidation (M); HLys-Hex; Nitrotyrosine	42051	Actin alpha skeletal muscle OS=Mus musculus OX=10090 GN=Acta1 PE=1 SV=1
37	160	P68033|ACTC_MOUSE	178.66	29	25	28		0	13	1	27	26	Oxidation (M); HLys-Hex; Nitrotyrosine	42019	Actin alpha cardiac muscle 1 OS=Mus musculus OX=10090 GN=Actc1 PE=1 SV=1
156	135	G5E829|AT2B1_MOUSE	167.42	8	5	6	8880000		9	1	7	7	Carbamidomethylation	134747	Plasma membrane calcium-transporting ATPase 1 OS=Mus musculus OX=10090 GN=Atp2b1 PE=1 SV=1
201	308	tr|Q8C048|Q8C048_MOUSE	135.19	6	4	5	1140000		7	1	6	6	Carbamidomethylation	125714	Calcium-transporting ATPase OS=Mus musculus OX=10090 GN=Atp2b3 PE=1 SV=1
201	309	tr|A2ALL9|A2ALL9_MOUSE	135.19	6	4	4	1140000		7	1	6	6	Carbamidomethylation	128739	Calcium-transporting ATPase OS=Mus musculus OX=10090 GN=Atp2b3 PE=1 SV=1
201	311	tr|Q0VF55|Q0VF55_MOUSE	135.19	6	4	4	1140000		7	1	6	6	Carbamidomethylation	134360	Calcium-transporting ATPase OS=Mus musculus OX=10090 GN=Atp2b3 PE=1 SV=1
169	354	P63011|RAB3A_MOUSE	133.33	24	17	24	27900000	31800000	5	1	6	8	Carbamidomethylation; Deamidation N	24970	Ras-related protein Rab-3A OS=Mus musculus OX=10090 GN=Rab3a PE=1 SV=1
445	507	tr|F7AAP4|F7AAP4_MOUSE	129.91	5	1	5		0	4	1	1	4	Carbamidomethylation	128562	Calcium-transporting ATPase OS=Mus musculus OX=10090 GN=Atp2b4 PE=1 SV=1
445	508	tr|E9Q828|E9Q828_MOUSE	129.91	5	1	5		0	4	1	1	4	Carbamidomethylation	129256	Calcium-transporting ATPase OS=Mus musculus OX=10090 GN=Atp2b4 PE=1 SV=1
445	509	Q6Q477|AT2B4_MOUSE	129.91	5	1	5		0	4	1	1	4	Carbamidomethylation	133068	Plasma membrane calcium-transporting ATPase 4 OS=Mus musculus OX=10090 GN=Atp2b4 PE=1 SV=1
242	355	Q9D1G1|RAB1B_MOUSE	123.83	27	19	19	376000		5	1	4	6		22187	Ras-related protein Rab-1B OS=Mus musculus OX=10090 GN=Rab1b PE=1 SV=1
244	468	P08752|GNAI2_MOUSE	123.46	13	10	13	958000	1380000	4	1	4	6	Carbamidomethylation	40489	Guanine nucleotide-binding protein G(i) subunit alpha-2 OS=Mus musculus OX=10090 GN=Gnai2 PE=1 SV=5
274	482	B2RSH2|GNAI1_MOUSE	118.53	14	11	10	716000		4	1	4	5	Carbamidomethylation	40361	Guanine nucleotide-binding protein G(i) subunit alpha-1 OS=Mus musculus OX=10090 GN=Gnai1 PE=1 SV=1
171	404	Q8BFZ3|ACTBL_MOUSE	117.1	13	13	13	722000	931000	5	1	7	7	Deamidation N	42004	Beta-actin-like protein 2 OS=Mus musculus OX=10090 GN=Actbl2 PE=1 SV=1
277	556	tr|Q8CCM0|Q8CCM0_MOUSE	110.36	13	11	8		0	4	1	4	5		40678	Calcium/calmodulin-dependent protein kinase type II subunit delta OS=Mus musculus OX=10090 GN=Camk2d PE=1 SV=1
277	558	tr|E9Q1V9|E9Q1V9_MOUSE	110.36	10	8	6		0	4	1	4	5		55293	Calcium/calmodulin-dependent protein kinase type II subunit delta OS=Mus musculus OX=10090 GN=Camk2d PE=1 SV=2
277	559	Q6PHZ2|KCC2D_MOUSE	110.36	10	8	6		0	4	1	4	5		56369	Calcium/calmodulin-dependent protein kinase type II subunit delta OS=Mus musculus OX=10090 GN=Camk2d PE=1 SV=1
277	560	tr|E9Q1W0|E9Q1W0_MOUSE	110.36	9	7	6		0	4	1	4	5		57749	Calcium/calmodulin-dependent protein kinase type II subunit delta OS=Mus musculus OX=10090 GN=Camk2d PE=1 SV=2
277	562	tr|E9Q1T1|E9Q1T1_MOUSE	110.36	9	7	5		0	4	1	4	5		60005	Calcium/calmodulin-dependent protein kinase type II subunit delta OS=Mus musculus OX=10090 GN=Camk2d PE=1 SV=1
277	561	tr|A0A0G2JGS4|A0A0G2JGS4_MOUSE	110.36	9	7	5		0	4	1	4	5		60004	Calcium/calmodulin-dependent protein kinase type II subunit delta OS=Mus musculus OX=10090 GN=Camk2d PE=1 SV=1
499	1031	Q8K0T0|RTN1_MOUSE	108.83	3	3	3	1200000	1220000	2	1	2	3		83572	Reticulon-1 OS=Mus musculus OX=10090 GN=Rtn1 PE=1 SV=1
155	1044	tr|V9GXQ2|V9GXQ2_MOUSE	107.36	8	8	8	686000		3	1	8	7		17596	Predicted gene 17087 OS=Mus musculus OX=10090 GN=Gm17087 PE=1 SV=1
359	639	P43274|H14_MOUSE	107.16	15	15	15	12100000	11800000	3	1	3	3		21977	Histone H1.4 OS=Mus musculus OX=10090 GN=Hist1h1e PE=1 SV=2
209	589	Q8BZ98|DYN3_MOUSE	105.77	4	4	4	779000	564000	4	1	6	6		97190	Dynamin-3 OS=Mus musculus OX=10090 GN=Dnm3 PE=1 SV=1
209	588	tr|E9QLL2|E9QLL2_MOUSE	105.77	4	4	4	779000	564000	4	1	6	6		97274	Dynamin-3 OS=Mus musculus OX=10090 GN=Dnm3 PE=1 SV=1
374	1034	tr|Q7M6W1|Q7M6W1_MOUSE	105.17	11	11	11	4340000	6350000	2	1	3	4		23558	Reticulon OS=Mus musculus OX=10090 GN=Rtn1 PE=1 SV=1
374	1038	tr|A3QM89|A3QM89_MOUSE	105.17	9	9	9	4340000	6350000	2	1	3	4		28299	Reticulon (Fragment) OS=Mus musculus OX=10090 GN=Rtn1 PE=1 SV=1
243	413	Q8VED5|K2C79_MOUSE	100.22	7	7	5	202000	246000	6	1	6	4		57552	Keratin type II cytoskeletal 79 OS=Mus musculus OX=10090 GN=Krt79 PE=1 SV=2
363	708	P15864|H12_MOUSE	98.42	15	15	15	6470000	6370000	3	1	3	3		21267	Histone H1.2 OS=Mus musculus OX=10090 GN=Hist1h1c PE=1 SV=2
363	710	P43277|H13_MOUSE	98.42	14	14	14	6470000	6370000	3	1	3	3		22100	Histone H1.3 OS=Mus musculus OX=10090 GN=Hist1h1d PE=1 SV=2
392	571	P05132|KAPCA_MOUSE	96.62	11	9	7	292000		4	1	3	3		40571	cAMP-dependent protein kinase catalytic subunit alpha OS=Mus musculus OX=10090 GN=Prkaca PE=1 SV=3
347	544	P62137|PP1A_MOUSE	96.04	11	8	11	0	0	4	1	3	4	Carbamidomethylation	37540	Serine/threonine-protein phosphatase PP1-alpha catalytic subunit OS=Mus musculus OX=10090 GN=Ppp1ca PE=1 SV=1
503	1079	O55042|SYUA_MOUSE	95.44	18	18	18	2660000	2820000	2	1	2	3		14485	Alpha-synuclein OS=Mus musculus OX=10090 GN=Snca PE=1 SV=2
348	572	P68181|KAPCB_MOUSE	94.41	11	9	11	363000	437000	4	1	3	4		40708	cAMP-dependent protein kinase catalytic subunit beta OS=Mus musculus OX=10090 GN=Prkacb PE=1 SV=2
247	552	P61028|RAB8B_MOUSE	91.96	21	14	21		70900	4	1	4	6		23603	Ras-related protein Rab-8B OS=Mus musculus OX=10090 GN=Rab8b PE=1 SV=1
352	598	tr|E9PVM7|E9PVM7_MOUSE	90.16	16	16	13	668000		4	1	4	3	Carbamidomethylation	25504	Glutathione S-transferase (Fragment) OS=Mus musculus OX=10090 GN=Gstm5 PE=1 SV=1
352	599	P48774|GSTM5_MOUSE	90.16	16	16	12	668000		4	1	4	3	Carbamidomethylation	26635	Glutathione S-transferase Mu 5 OS=Mus musculus OX=10090 GN=Gstm5 PE=1 SV=1
92	1740	P02104|HBE_MOUSE	89.04	7	7	7	98700	113000	4	1	10	14		16137	Hemoglobin subunit epsilon-Y2 OS=Mus musculus OX=10090 GN=Hbb-y PE=1 SV=2
355	614	P84084|ARF5_MOUSE	88.02	17	17	11	1460000	2250000	3	1	4	2		20530	ADP-ribosylation factor 5 OS=Mus musculus OX=10090 GN=Arf5 PE=1 SV=2
351	596	Q3UV17|K22O_MOUSE	87.94	5	5	4	3720000	5040000	4	1	4	3	Carbamidomethylation	62845	Keratin type II cytoskeletal 2 oral OS=Mus musculus OX=10090 GN=Krt76 PE=1 SV=1
889	1579	O35295|PURB_MOUSE	87.02	6	6	6	554000	916000	1	1	1	1		33901	Transcriptional activator protein Pur-beta OS=Mus musculus OX=10090 GN=Purb PE=1 SV=3
609	1326	P63024|VAMP3_MOUSE	85.71	23	23	23	7030000	6770000	2	1	2	2		11480	Vesicle-associated membrane protein 3 OS=Mus musculus OX=10090 GN=Vamp3 PE=1 SV=1
609	1328	P63044|VAMP2_MOUSE	85.71	21	21	21	7030000	6770000	2	1	2	2		12691	Vesicle-associated membrane protein 2 OS=Mus musculus OX=10090 GN=Vamp2 PE=1 SV=2
609	1331	tr|B0QZN5|B0QZN5_MOUSE	85.71	15	15	15	7030000	6770000	2	1	2	2		17862	Vesicle-associated membrane protein 2 OS=Mus musculus OX=10090 GN=Vamp2 PE=1 SV=1
455	709	P61021|RAB5B_MOUSE	84	16	11	16	547000	951000	3	1	2	3		23707	Ras-related protein Rab-5B OS=Mus musculus OX=10090 GN=Rab5b PE=1 SV=1
507	1384	tr|E9Q0F0|E9Q0F0_MOUSE	83.63	2	2	2	3610000	5220000	3	1	3	2		112265	Keratin 78 OS=Mus musculus OX=10090 GN=Krt78 PE=1 SV=1
570	951	tr|A0A2R8VHN3|A0A2R8VHN3_MOUSE	83.29	15	8	15	2860000	2830000	2	1	1	2	Carbamidomethylation	17781	Poly(rC)-binding protein 2 (Fragment) OS=Mus musculus OX=10090 GN=Pcbp2 PE=1 SV=1
570	952	tr|A0A2R8W6L5|A0A2R8W6L5_MOUSE	83.29	11	6	11	2860000	2830000	2	1	1	2	Carbamidomethylation	23635	Poly(rC)-binding protein 2 (Fragment) OS=Mus musculus OX=10090 GN=Pcbp2 PE=1 SV=1
570	953	tr|E9Q7D8|E9Q7D8_MOUSE	83.29	11	6	11	2860000	2830000	2	1	1	2	Carbamidomethylation	24117	Poly(rC)-binding protein 3 OS=Mus musculus OX=10090 GN=Pcbp3 PE=1 SV=1
570	954	tr|A0A2R8VI71|A0A2R8VI71_MOUSE	83.29	10	6	10	2860000	2830000	2	1	1	2	Carbamidomethylation	25496	Poly(rC)-binding protein 2 (Fragment) OS=Mus musculus OX=10090 GN=Pcbp2 PE=1 SV=1
570	955	tr|A0A2R8VHY9|A0A2R8VHY9_MOUSE	83.29	10	6	10	2860000	2830000	2	1	1	2	Carbamidomethylation	26423	Poly(rC)-binding protein 2 (Fragment) OS=Mus musculus OX=10090 GN=Pcbp2 PE=1 SV=1
570	956	tr|A0A2R8VI12|A0A2R8VI12_MOUSE	83.29	9	5	9	2860000	2830000	2	1	1	2	Carbamidomethylation	29783	Poly(rC)-binding protein 2 (Fragment) OS=Mus musculus OX=10090 GN=Pcbp2 PE=1 SV=1
570	957	tr|A0A2R8VI25|A0A2R8VI25_MOUSE	83.29	8	4	8	2860000	2830000	2	1	1	2	Carbamidomethylation	33299	Poly(RC) binding protein 2 isoform CRA_d OS=Mus musculus OX=10090 GN=Pcbp2 PE=1 SV=1
570	958	tr|Q3TT81|Q3TT81_MOUSE	83.29	8	4	8	2860000	2830000	2	1	1	2	Carbamidomethylation	33926	Poly(rC)-binding protein 2 OS=Mus musculus OX=10090 GN=Pcbp2 PE=1 SV=1
570	959	tr|A0A2R8VHP9|A0A2R8VHP9_MOUSE	83.29	7	4	7	2860000	2830000	2	1	1	2	Carbamidomethylation	35347	Poly(rC)-binding protein 2 OS=Mus musculus OX=10090 GN=Pcbp2 PE=1 SV=1
570	960	tr|B2M1R7|B2M1R7_MOUSE	83.29	7	4	7	2860000	2830000	2	1	1	2	Carbamidomethylation	38151	Poly(rC)-binding protein 2 OS=Mus musculus OX=10090 GN=Pcbp2 PE=1 SV=1
570	961	Q61990|PCBP2_MOUSE	83.29	7	4	7	2860000	2830000	2	1	1	2	Carbamidomethylation	38222	Poly(rC)-binding protein 2 OS=Mus musculus OX=10090 GN=Pcbp2 PE=1 SV=1
570	962	P57722|PCBP3_MOUSE	83.29	7	4	7	2860000	2830000	2	1	1	2	Carbamidomethylation	39294	Poly(rC)-binding protein 3 OS=Mus musculus OX=10090 GN=Pcbp3 PE=1 SV=3
312	597	Q8R5C5|ACTY_MOUSE	82.92	13	13	11	0	0	4	1	4	3	Carbamidomethylation; Deamidation N	42281	Beta-centractin OS=Mus musculus OX=10090 GN=Actr1b PE=1 SV=1
681	1072	tr|D3Z396|D3Z396_MOUSE	82.4	7	4	7	3870000	4030000	2	1	1	2		34955	Neurotrimin OS=Mus musculus OX=10090 GN=Ntm PE=1 SV=1
681	1076	tr|Q8BG33|Q8BG33_MOUSE	82.4	7	4	7	3870000	4030000	2	1	1	2		37941	Neurotrimin OS=Mus musculus OX=10090 GN=Ntm PE=1 SV=1
681	1075	Q99PJ0|NTRI_MOUSE	82.4	7	4	7	3870000	4030000	2	1	1	2		37984	Neurotrimin OS=Mus musculus OX=10090 GN=Ntm PE=1 SV=2
1421	1590	tr|M0QWK5|M0QWK5_MOUSE	82.06	35	35	0	758000		1	1	1	0		4628	Eukaryotic translation elongation factor 1 beta 2 OS=Mus musculus OX=10090 GN=Eef1b2 PE=1 SV=1
1421	1591	tr|M0QWH8|M0QWH8_MOUSE	82.06	31	31	0	758000		1	1	1	0		5365	Eukaryotic translation elongation factor 1 beta 2 OS=Mus musculus OX=10090 GN=Eef1b2 PE=1 SV=1
1421	1592	tr|G3UX43|G3UX43_MOUSE	82.06	22	22	0	758000		1	1	1	0		7543	Eukaryotic translation elongation factor 1 beta 2 OS=Mus musculus OX=10090 GN=Eef1b2 PE=1 SV=1
1421	1594	tr|G3UZ47|G3UZ47_MOUSE	82.06	16	16	0	758000		1	1	1	0		10181	Eukaryotic translation elongation factor 1 beta 2 (Fragment) OS=Mus musculus OX=10090 GN=Eef1b2 PE=1 SV=1
1421	1595	tr|A0A087WS46|A0A087WS46_MOUSE	82.06	8	8	0	758000		1	1	1	0		20137	Eukaryotic translation elongation factor 1 beta 2 OS=Mus musculus OX=10090 GN=Eef1b2 PE=1 SV=1
1421	1596	O70251|EF1B_MOUSE	82.06	7	7	0	758000		1	1	1	0		24694	Elongation factor 1-beta OS=Mus musculus OX=10090 GN=Eef1b PE=1 SV=5
859	1220	tr|Q3TMU8|Q3TMU8_MOUSE	81.78	6	0	6		821000	2	1	0	2	Deamidation N	61928	Dihydropyrimidinase-like 4 OS=Mus musculus OX=10090 GN=Dpysl4 PE=1 SV=1
859	1219	O35098|DPYL4_MOUSE	81.78	6	0	6		821000	2	1	0	2	Deamidation N	61962	Dihydropyrimidinase-related protein 4 OS=Mus musculus OX=10090 GN=Dpysl4 PE=1 SV=1
859	1221	tr|A0A0R4J1N0|A0A0R4J1N0_MOUSE	81.78	5	0	5		821000	2	1	0	2	Deamidation N	64303	Dihydropyrimidinase-related protein 4 OS=Mus musculus OX=10090 GN=Dpysl4 PE=1 SV=1
284	805	Q6PHN9|RAB35_MOUSE	81.7	15	15	15	1360000	1760000	3	1	4	5		23025	Ras-related protein Rab-35 OS=Mus musculus OX=10090 GN=Rab35 PE=1 SV=1
186	1629	tr|Q9Z1R9|Q9Z1R9_MOUSE	79.19	8	8	8	0	0	2	1	4	5	Deamidation N	26135	MCG124046 OS=Mus musculus OX=10090 GN=Prss1 PE=1 SV=1
468	822	tr|D3Z6I8|D3Z6I8_MOUSE	78.32	12	9	12	1620000	2090000	3	1	2	3		28723	Tropomyosin alpha-3 chain OS=Mus musculus OX=10090 GN=Tpm3 PE=1 SV=1
468	823	tr|E9Q7Q3|E9Q7Q3_MOUSE	78.32	12	9	12	1620000	2090000	3	1	2	3		28734	Tropomyosin alpha-3 chain OS=Mus musculus OX=10090 GN=Tpm3 PE=1 SV=1
685	1094	P11983|TCPA_MOUSE	78.19	5	2	5	1420000	1680000	2	1	1	2		60449	T-complex protein 1 subunit alpha OS=Mus musculus OX=10090 GN=Tcp1 PE=1 SV=3
469	824	tr|D3Z2H9|D3Z2H9_MOUSE	74.64	11	8	11	4000000	3860000	3	1	2	3		28992	Tropomyosin 3 related sequence 7 OS=Mus musculus OX=10090 GN=Tpm3-rs7 PE=3 SV=1
469	825	tr|E9Q5J9|E9Q5J9_MOUSE	74.64	9	7	9	4000000	3860000	3	1	2	3		33281	Tropomyosin alpha-3 chain OS=Mus musculus OX=10090 GN=Tpm3 PE=1 SV=1
451	651	Q99JI6|RAP1B_MOUSE	74.22	15	10	11	8430000	7310000	3	1	2	2	Carbamidomethylation	20825	Ras-related protein Rap-1b OS=Mus musculus OX=10090 GN=Rap1b PE=1 SV=2
890	1600	Q61016|GBG7_MOUSE	74.04	24	24	24	923000	1770000	1	1	1	1		7480	Guanine nucleotide-binding protein G(I)/G(S)/G(O) subunit gamma-7 OS=Mus musculus OX=10090 GN=Gng7 PE=1 SV=2
890	1601	tr|G3X9Q2|G3X9Q2_MOUSE	74.04	23	23	23	923000	1770000	1	1	1	1		7611	Guanine nucleotide-binding protein subunit gamma OS=Mus musculus OX=10090 GN=Gng7 PE=1 SV=1
1422	1598	tr|D3YVV1|D3YVV1_MOUSE	73.74	5	5	0	0		1	1	1	0		37179	Cell cycle control protein OS=Mus musculus OX=10090 GN=Tmem30a PE=1 SV=1
1422	1599	Q8VEK0|CC50A_MOUSE	73.74	4	4	0	0		1	1	1	0		41061	Cell cycle control protein 50A OS=Mus musculus OX=10090 GN=Tmem30a PE=1 SV=1
629	1602	Q60771|CLD11_MOUSE	73.62	7	7	7	10900000	12400000	1	1	2	2		22114	Claudin-11 OS=Mus musculus OX=10090 GN=Cldn11 PE=1 SV=1
496	978	tr|Q2NKI4|Q2NKI4_MOUSE	73.05	3	3	3	1930000	3250000	2	1	2	2	Carbamidomethylation	72964	Protein kinase C OS=Mus musculus OX=10090 GN=Prkcg PE=1 SV=1
496	979	P63318|KPCG_MOUSE	73.05	3	3	3	1930000	3250000	2	1	2	2	Carbamidomethylation	78358	Protein kinase C gamma type OS=Mus musculus OX=10090 GN=Prkcg PE=1 SV=1
675	966	tr|S4R1I6|S4R1I6_MOUSE	70.91	5	5	0	1170000		2	1	2	0	Carbamidomethylation	46073	MCG2872 isoform CRA_b OS=Mus musculus OX=10090 GN=Ddx5 PE=1 SV=1
675	967	Q61656|DDX5_MOUSE	70.91	3	3	0	1170000		2	1	2	0	Carbamidomethylation	69290	Probable ATP-dependent RNA helicase DDX5 OS=Mus musculus OX=10090 GN=Ddx5 PE=1 SV=2
675	968	tr|Q8BTS0|Q8BTS0_MOUSE	70.91	3	3	0	1170000		2	1	2	0	Carbamidomethylation	69266	DEAD (Asp-Glu-Ala-Asp) box polypeptide 5 OS=Mus musculus OX=10090 GN=Ddx5 PE=1 SV=1
375	1377	Q9D0M5|DYL2_MOUSE	70.54	20	20	20	13000000	10200000	2	1	3	4		10350	Dynein light chain 2 cytoplasmic OS=Mus musculus OX=10090 GN=Dynll2 PE=1 SV=1
370	969	P27601|GNA13_MOUSE	69.44	6	6	6	246000	277000	2	1	2	3		44055	Guanine nucleotide-binding protein subunit alpha-13 OS=Mus musculus OX=10090 GN=Gna13 PE=1 SV=1
512	1413	P63168|DYL1_MOUSE	68.82	20	20	20	1650000	3280000	2	1	2	3		10366	Dynein light chain 1 cytoplasmic OS=Mus musculus OX=10090 GN=Dynll1 PE=1 SV=1
251	1206	tr|A0A0J9YVA6|A0A0J9YVA6_MOUSE	68.7	9	9	9	2110000	3080000	2	1	5	5		23155	Septin-11 (Fragment) OS=Mus musculus OX=10090 GN=Sept11 PE=1 SV=1
251	1214	tr|A0A0J9YTY0|A0A0J9YTY0_MOUSE	68.7	4	4	4	2110000	3080000	2	1	5	5		48979	Septin-11 OS=Mus musculus OX=10090 GN=Sept11 PE=1 SV=1
251	1215	Q8C1B7|SEP11_MOUSE	68.7	4	4	4	2110000	3080000	2	1	5	5		49695	Septin-11 OS=Mus musculus OX=10090 GN=Sept11 PE=1 SV=4
251	1216	tr|A0A0J9YUL3|A0A0J9YUL3_MOUSE	68.7	4	4	4	2110000	3080000	2	1	5	5		49782	Septin 11 isoform CRA_b OS=Mus musculus OX=10090 GN=Sept11 PE=1 SV=1
494	976	Q8JZQ2|AFG32_MOUSE	66.7	3	3	3	204000	164000	2	1	2	2		89519	AFG3-like protein 2 OS=Mus musculus OX=10090 GN=Afg3l2 PE=1 SV=1
622	1474	P60879|SNP25_MOUSE	66.28	8	8	8	3110000	10100000	1	1	1	2		23315	Synaptosomal-associated protein 25 OS=Mus musculus OX=10090 GN=Snap25 PE=1 SV=1
492	949	tr|Q5NC80|Q5NC80_MOUSE	66.26	16	16	16	218000	555000	2	1	2	2		14092	Nucleoside diphosphate kinase (Fragment) OS=Mus musculus OX=10090 GN=Nme1 PE=1 SV=1
492	950	P15532|NDKA_MOUSE	66.26	13	13	13	218000	555000	2	1	2	2		17208	Nucleoside diphosphate kinase A OS=Mus musculus OX=10090 GN=Nme1 PE=1 SV=1
892	1614	P80314|TCPB_MOUSE	65.67	3	3	3	372000	492000	1	1	1	1	Carbamidomethylation	57477	T-complex protein 1 subunit beta OS=Mus musculus OX=10090 GN=Cct2 PE=1 SV=4
891	1613	O89053|COR1A_MOUSE	65.65	3	3	3	1240000	1310000	1	1	1	1		50989	Coronin-1A OS=Mus musculus OX=10090 GN=Coro1a PE=1 SV=5
1423	1615	P63028|TCTP_MOUSE	65.27	8	0	8		1630000	1	1	0	1		19462	Translationally-controlled tumor protein OS=Mus musculus OX=10090 GN=Tpt1 PE=1 SV=1
894	1621	Q3UHJ0|AAK1_MOUSE	63.72	2	2	2	165000	0	1	1	1	1		103346	AP2-associated protein kinase 1 OS=Mus musculus OX=10090 GN=Aak1 PE=1 SV=2
706	1271	tr|D3Z568|D3Z568_MOUSE	63.55	16	9	16		396000	2	1	1	2		14038	NADH dehydrogenase (Ubiquinone) 1 beta subcomplex 5 isoform CRA_e OS=Mus musculus OX=10090 GN=Ndufb5 PE=1 SV=1
706	1275	Q9CQH3|NDUB5_MOUSE	63.55	10	6	10		396000	2	1	1	2		21710	NADH dehydrogenase [ubiquinone] 1 beta subcomplex subunit 5 mitochondrial OS=Mus musculus OX=10090 GN=Ndufb5 PE=1 SV=1
893	1619	tr|A0A286YDW8|A0A286YDW8_MOUSE	63.46	8	8	8	241000	324000	1	1	1	1		22824	26S proteasome non-ATPase regulatory subunit 6 (Fragment) OS=Mus musculus OX=10090 GN=Psmd6 PE=1 SV=1
893	1620	Q99JI4|PSMD6_MOUSE	63.46	4	4	4	241000	324000	1	1	1	1		45536	26S proteasome non-ATPase regulatory subunit 6 OS=Mus musculus OX=10090 GN=Psmd6 PE=1 SV=1
896	1633	tr|D3YYM6|D3YYM6_MOUSE	62.64	7	7	7	232000	477000	1	1	1	1	Carbamidomethylation	20414	40S ribosomal protein S5 (Fragment) OS=Mus musculus OX=10090 GN=Rps5 PE=1 SV=1
896	1634	tr|D3Z1S8|D3Z1S8_MOUSE	62.64	7	7	7	232000	477000	1	1	1	1	Carbamidomethylation	21080	40S ribosomal protein S5 (Fragment) OS=Mus musculus OX=10090 GN=Rps5 PE=1 SV=1
896	1636	P97461|RS5_MOUSE	62.64	6	6	6	232000	477000	1	1	1	1	Carbamidomethylation	22889	40S ribosomal protein S5 OS=Mus musculus OX=10090 GN=Rps5 PE=1 SV=3
896	1635	tr|Q91V55|Q91V55_MOUSE	62.64	6	6	6	232000	477000	1	1	1	1	Carbamidomethylation	22876	40S ribosomal protein S5 OS=Mus musculus OX=10090 GN=Rps5 PE=1 SV=1
895	1630	P62900|RL31_MOUSE	62.63	11	11	11	193000	190000	1	1	1	1		14463	60S ribosomal protein L31 OS=Mus musculus OX=10090 GN=Rpl31 PE=1 SV=1
895	1631	tr|A0A0A6YX26|A0A0A6YX26_MOUSE	62.63	11	11	11	193000	190000	1	1	1	1		14997	60S ribosomal protein L31 OS=Mus musculus OX=10090 GN=Rpl31 PE=1 SV=1
1426	1649	Q05920|PYC_MOUSE	62.18	1	1	0	313000		1	1	1	0	Carbamidomethylation	129684	Pyruvate carboxylase mitochondrial OS=Mus musculus OX=10090 GN=Pc PE=1 SV=1
1426	1648	tr|G5E8R3|G5E8R3_MOUSE	62.18	1	1	0	313000		1	1	1	0	Carbamidomethylation	129701	Pyruvate carboxylase OS=Mus musculus OX=10090 GN=Pcx PE=1 SV=1
1426	1650	tr|E9QPD7|E9QPD7_MOUSE	62.18	1	1	0	313000		1	1	1	0	Carbamidomethylation	129832	Pyruvate carboxylase OS=Mus musculus OX=10090 GN=Pcx PE=1 SV=1
1427	1653	tr|D3YTP4|D3YTP4_MOUSE	62.03	9	9	0	103000		1	1	1	0		13716	Secretory carrier-associated membrane protein (Fragment) OS=Mus musculus OX=10090 GN=Scamp1 PE=1 SV=1
1427	1666	tr|Q3TSA8|Q3TSA8_MOUSE	62.03	4	4	0	103000		1	1	1	0		32338	Secretory carrier-associated membrane protein OS=Mus musculus OX=10090 GN=Scamp1 PE=1 SV=1
1427	1668	Q8K021|SCAM1_MOUSE	62.03	3	3	0	103000		1	1	1	0		38029	Secretory carrier-associated membrane protein 1 OS=Mus musculus OX=10090 GN=Scamp1 PE=1 SV=1
888	1646	P12382|PFKAL_MOUSE	61.96	2	0	2		0	1	1	0	1	Deamidation N	85360	ATP-dependent 6-phosphofructokinase liver type OS=Mus musculus OX=10090 GN=Pfkl PE=1 SV=4
1425	1647	P84086|CPLX2_MOUSE	61.85	11	0	11		4740000	1	1	0	1	Carbamidomethylation	15394	Complexin-2 OS=Mus musculus OX=10090 GN=Cplx2 PE=1 SV=1
886	1637	tr|A0A0A6YW90|A0A0A6YW90_MOUSE	60.81	2	2	0	348000		1	1	1	0		87152	Glutamate receptor 2 OS=Mus musculus OX=10090 GN=Gria2 PE=1 SV=1
886	1640	P23819|GRIA2_MOUSE	60.81	2	2	0	348000		1	1	1	0		98662	Glutamate receptor 2 OS=Mus musculus OX=10090 GN=Gria2 PE=1 SV=3
886	1639	tr|G5E8H1|G5E8H1_MOUSE	60.81	2	2	0	348000		1	1	1	0		98761	Glutamate receptor 2 OS=Mus musculus OX=10090 GN=Gria2 PE=1 SV=1
886	1638	tr|E9QKC0|E9QKC0_MOUSE	60.81	2	2	0	348000		1	1	1	0		98818	Glutamate receptor 2 OS=Mus musculus OX=10090 GN=Gria2 PE=1 SV=1
898	1654	Q6W8Q3|PC4L1_MOUSE	60.78	21	21	21	360000	340000	1	1	1	1		7502	Purkinje cell protein 4-like protein 1 OS=Mus musculus OX=10090 GN=Pcp4l1 PE=1 SV=1
482	870	tr|E9Q5B5|E9Q5B5_MOUSE	60.73	3	2	3		2250000	3	1	2	3		99214	Hexokinase-2 OS=Mus musculus OX=10090 GN=Hk2 PE=1 SV=1
482	871	O08528|HXK2_MOUSE	60.73	3	2	3		2250000	3	1	2	3		102535	Hexokinase-2 OS=Mus musculus OX=10090 GN=Hk2 PE=1 SV=1
897	1641	O35658|C1QBP_MOUSE	60.52	5	5	5	1580000	2150000	1	1	1	1		31013	Complement component 1 Q subcomponent-binding protein mitochondrial OS=Mus musculus OX=10090 GN=C1qbp PE=1 SV=1
897	1642	tr|Q8R5L1|Q8R5L1_MOUSE	60.52	5	5	5	1580000	2150000	1	1	1	1		31025	Complement component 1 Q subcomponent-binding protein mitochondrial OS=Mus musculus OX=10090 GN=C1qbp PE=1 SV=1
604	1268	P58389|PTPA_MOUSE	60.25	7	7	7	1390000	1240000	2	1	2	2		36710	Serine/threonine-protein phosphatase 2A activator OS=Mus musculus OX=10090 GN=Ptpa PE=1 SV=1
1424	1645	P28271|ACOC_MOUSE	60.24	2	2	0	158000		1	1	1	0		98126	Cytoplasmic aconitate hydratase OS=Mus musculus OX=10090 GN=Aco1 PE=1 SV=3
516	1956	tr|Q792Z1|Q792Z1_MOUSE	60.04	11	11	11	0	0	2	1	3	2	Deamidation N	26221	MCG140784 OS=Mus musculus OX=10090 GN=Try10 PE=1 SV=1
578	987	tr|A2AUK7|A2AUK7_MOUSE	60.01	2	1	2	1370000	1570000	2	1	1	2	Carbamidomethylation	81891	Band 4.1-like protein 1 OS=Mus musculus OX=10090 GN=Epb41l1 PE=1 SV=1
578	988	tr|A2AUK8|A2AUK8_MOUSE	60.01	2	1	2	1370000	1570000	2	1	1	2	Carbamidomethylation	96853	Band 4.1-like protein 1 OS=Mus musculus OX=10090 GN=Epb41l1 PE=1 SV=1
578	990	tr|A2AUK5|A2AUK5_MOUSE	60.01	2	1	2	1370000	1570000	2	1	1	2	Carbamidomethylation	98315	Band 4.1-like protein 1 OS=Mus musculus OX=10090 GN=Epb41l1 PE=1 SV=1
578	989	Q9Z2H5|E41L1_MOUSE	60.01	2	1	2	1370000	1570000	2	1	1	2	Carbamidomethylation	98315	Band 4.1-like protein 1 OS=Mus musculus OX=10090 GN=Epb41l1 PE=1 SV=2
861	1292	tr|A2A513|A2A513_MOUSE	59.9	3	3	0	1130000		2	1	2	0		57041	Keratin type I cytoskeletal 10 OS=Mus musculus OX=10090 GN=Krt10 PE=1 SV=1
861	1293	P02535|K1C10_MOUSE	59.9	3	3	0	1130000		2	1	2	0		57770	Keratin type I cytoskeletal 10 OS=Mus musculus OX=10090 GN=Krt10 PE=1 SV=3
899	1655	tr|D3Z563|D3Z563_MOUSE	59.44	29	29	0	4880000		1	1	2	0		7237	Acyl-CoA-binding protein OS=Mus musculus OX=10090 GN=Dbi PE=1 SV=1
899	1656	P31786|ACBP_MOUSE	59.44	21	21	0	4880000		1	1	2	0		10000	Acyl-CoA-binding protein OS=Mus musculus OX=10090 GN=Dbi PE=1 SV=2
899	1657	tr|Q4VWZ5|Q4VWZ5_MOUSE	59.44	13	13	0	4880000		1	1	2	0		15229	Acyl-CoA-binding protein OS=Mus musculus OX=10090 GN=Dbi PE=1 SV=1
703	1249	tr|F6QD74|F6QD74_MOUSE	59.09	2	2	1	166000	147000	2	1	2	1		109899	Cytoplasmic FMR1-interacting protein 2 (Fragment) OS=Mus musculus OX=10090 GN=Cyfip2 PE=1 SV=1
703	1253	Q5SQX6|CYFP2_MOUSE	59.09	2	2	1	166000	147000	2	1	2	1		145659	Cytoplasmic FMR1-interacting protein 2 OS=Mus musculus OX=10090 GN=Cyfip2 PE=1 SV=2
909	1713	tr|F7BX26|F7BX26_MOUSE	58.76	2	2	2	398000	440000	1	1	1	1		54324	Serine/threonine-protein phosphatase (Fragment) OS=Mus musculus OX=10090 GN=Ppp5c PE=1 SV=1
909	1714	Q60676|PPP5_MOUSE	58.76	2	2	2	398000	440000	1	1	1	1		56877	Serine/threonine-protein phosphatase 5 OS=Mus musculus OX=10090 GN=Ppp5c PE=1 SV=3
571	970	Q9R1T4|SEPT6_MOUSE	58.67	7	7	2	2630000		2	1	2	1		49620	Septin-6 OS=Mus musculus OX=10090 GN=Sept6 PE=1 SV=4
900	1665	Q9CZD3|GARS_MOUSE	58.56	2	2	2	95900	126000	1	1	1	1		81878	Glycine--tRNA ligase OS=Mus musculus OX=10090 GN=Gars PE=1 SV=1
1428	1670	tr|A0A0R4J083|A0A0R4J083_MOUSE	58.28	3	0	3		1250000	1	1	0	1		47897	Long-chain-specific acyl-CoA dehydrogenase mitochondrial OS=Mus musculus OX=10090 GN=Acadl PE=1 SV=1
1428	1669	P51174|ACADL_MOUSE	58.28	3	0	3		1250000	1	1	0	1		47908	Long-chain specific acyl-CoA dehydrogenase mitochondrial OS=Mus musculus OX=10090 GN=Acadl PE=1 SV=2
1432	1710	Q8K2C9|HACD3_MOUSE	57.97	3	0	3		1750000	1	1	0	1		43131	Very-long-chain (3R)-3-hydroxyacyl-CoA dehydratase 3 OS=Mus musculus OX=10090 GN=Hacd3 PE=1 SV=2
910	1716	P54823|DDX6_MOUSE	57.45	2	2	2	171000	347000	1	1	1	1		54192	Probable ATP-dependent RNA helicase DDX6 OS=Mus musculus OX=10090 GN=Ddx6 PE=1 SV=1
901	1667	Q9QYJ0|DNJA2_MOUSE	57.41	3	3	3	232000	211000	1	1	1	1	Carbamidomethylation	45746	DnaJ homolog subfamily A member 2 OS=Mus musculus OX=10090 GN=Dnaja2 PE=1 SV=1
902	1675	tr|F6U6Z2|F6U6Z2_MOUSE	57.23	6	6	6	0	0	1	1	1	1		24380	Phytanoyl-CoA hydroxylase-interacting protein-like (Fragment) OS=Mus musculus OX=10090 GN=Phyhipl PE=1 SV=1
902	1676	tr|F7D3N3|F7D3N3_MOUSE	57.23	4	4	4	0	0	1	1	1	1		37475	Phytanoyl-CoA hydroxylase-interacting protein-like OS=Mus musculus OX=10090 GN=Phyhipl PE=1 SV=1
902	1677	Q8BGT8|PHIPL_MOUSE	57.23	3	3	3	0	0	1	1	1	1		42341	Phytanoyl-CoA hydroxylase-interacting protein-like OS=Mus musculus OX=10090 GN=Phyhipl PE=1 SV=1
908	1707	tr|Q921L6|Q921L6_MOUSE	56.98	2	2	2	1740000	2000000	1	1	1	1		57086	Cortactin isoform CRA_a OS=Mus musculus OX=10090 GN=Cttn PE=1 SV=1
908	1708	Q60598|SRC8_MOUSE	56.98	2	2	2	1740000	2000000	1	1	1	1		61250	Src substrate cortactin OS=Mus musculus OX=10090 GN=Cttn PE=1 SV=2
733	1485	tr|A0A140T8I9|A0A140T8I9_MOUSE	56.96	1	1	1	0	83600	1	1	1	1		231353	Phosphatidylinositol 4-kinase alpha OS=Mus musculus OX=10090 GN=Pi4ka PE=1 SV=1
733	1486	E9Q3L2|PI4KA_MOUSE	56.96	1	1	1	0	83600	1	1	1	1		237040	Phosphatidylinositol 4-kinase alpha OS=Mus musculus OX=10090 GN=Pi4ka PE=1 SV=2
483	882	P49615|CDK5_MOUSE	56.68	8	8	5	0	0	3	1	3	2		33288	Cyclin-dependent-like kinase 5 OS=Mus musculus OX=10090 GN=Cdk5 PE=1 SV=1
905	1692	P97370|AT1B3_MOUSE	56.45	5	5	5	419000	1170000	1	1	1	1		31776	Sodium/potassium-transporting ATPase subunit beta-3 OS=Mus musculus OX=10090 GN=Atp1b3 PE=1 SV=1
744	1531	P50114|S100B_MOUSE	56.41	16	16	16	0	0	1	1	1	1		10728	Protein S100-B OS=Mus musculus OX=10090 GN=S100b PE=1 SV=2
903	1680	P10639|THIO_MOUSE	56.38	12	12	12	3370000	2760000	1	1	1	1		11675	Thioredoxin OS=Mus musculus OX=10090 GN=Txn PE=1 SV=3
707	1290	tr|D3YWU0|D3YWU0_MOUSE	56.32	5	5	3	153000	159000	2	1	2	1		54744	Disks large homolog 2 OS=Mus musculus OX=10090 GN=Dlg2 PE=1 SV=1
707	1295	tr|D3YUZ8|D3YUZ8_MOUSE	56.32	3	3	2	153000	159000	2	1	2	1		83951	Disks large homolog 2 OS=Mus musculus OX=10090 GN=Dlg2 PE=1 SV=1
707	1298	Q91XM9|DLG2_MOUSE	56.32	3	3	2	153000	159000	2	1	2	1		94880	Disks large homolog 2 OS=Mus musculus OX=10090 GN=Dlg2 PE=1 SV=2
707	1299	tr|E9Q2L2|E9Q2L2_MOUSE	56.32	3	3	2	153000	159000	2	1	2	1		97432	Disks large homolog 2 OS=Mus musculus OX=10090 GN=Dlg2 PE=1 SV=1
707	1300	tr|A0A338P6J0|A0A338P6J0_MOUSE	56.32	3	3	2	153000	159000	2	1	2	1		106769	Disks large homolog 2 OS=Mus musculus OX=10090 GN=Dlg2 PE=1 SV=1
939	1935	Q5EBJ4|ERMIN_MOUSE	56.05	3	3	3	439000	332000	1	1	1	1		32148	Ermin OS=Mus musculus OX=10090 GN=Ermn PE=1 SV=1
912	1726	O55100|SNG1_MOUSE	55.85	5	5	5	4140000	5490000	1	1	1	1		25653	Synaptogyrin-1 OS=Mus musculus OX=10090 GN=Syngr1 PE=1 SV=2
630	1686	P00416|COX3_MOUSE	55.84	5	5	5	15400000	14700000	1	1	2	2		29923	Cytochrome c oxidase subunit 3 OS=Mus musculus OX=10090 GN=mt-Co3 PE=1 SV=2
1429	1683	Q8VIJ6|SFPQ_MOUSE	55.83	2	2	0	959000		1	1	1	0		75442	Splicing factor proline- and glutamine-rich OS=Mus musculus OX=10090 GN=Sfpq PE=1 SV=1
1430	1690	Q8CG76|ARK72_MOUSE	55.7	4	4	0	187000		1	1	1	0		40612	Aflatoxin B1 aldehyde reductase member 2 OS=Mus musculus OX=10090 GN=Akr7a2 PE=1 SV=3
904	1687	tr|A0A3Q4EC00|A0A3Q4EC00_MOUSE	55.69	6	6	6	142000	142000	1	1	1	1		27842	Enoyl-CoA delta isomerase 1 mitochondrial OS=Mus musculus OX=10090 GN=Eci1 PE=1 SV=1
904	1688	tr|A0A452J8A5|A0A452J8A5_MOUSE	55.69	5	5	5	142000	142000	1	1	1	1		32023	Enoyl-CoA delta isomerase 1 mitochondrial OS=Mus musculus OX=10090 GN=Eci1 PE=4 SV=1
904	1689	P42125|ECI1_MOUSE	55.69	5	5	5	142000	142000	1	1	1	1		32250	Enoyl-CoA delta isomerase 1 mitochondrial OS=Mus musculus OX=10090 GN=Eci1 PE=1 SV=2
1434	1749	Q78IK2|ATPMD_MOUSE	55.4	17	0	17		5060000	1	1	0	1		6382	ATP synthase membrane subunit DAPIT mitochondrial OS=Mus musculus OX=10090 GN=Atp5md PE=1 SV=1
906	1696	tr|B7ZCD3|B7ZCD3_MOUSE	55.14	14	14	14	493000	564000	1	1	1	1		9696	Neural cell adhesion molecule L1 (Fragment) OS=Mus musculus OX=10090 GN=L1cam PE=1 SV=8
906	1723	tr|A2AFG7|A2AFG7_MOUSE	55.14	1	1	1	493000	564000	1	1	1	1		139822	Neural cell adhesion molecule L1 OS=Mus musculus OX=10090 GN=L1cam PE=1 SV=1
906	1724	tr|A2AFG8|A2AFG8_MOUSE	55.14	1	1	1	493000	564000	1	1	1	1		140431	Neural cell adhesion molecule L1 OS=Mus musculus OX=10090 GN=L1cam PE=1 SV=1
906	1725	tr|Q6PGJ3|Q6PGJ3_MOUSE	55.14	1	1	1	493000	564000	1	1	1	1		140916	L1 cell adhesion molecule OS=Mus musculus OX=10090 GN=L1cam PE=1 SV=1
906	1727	P11627|L1CAM_MOUSE	55.14	1	1	1	493000	564000	1	1	1	1		140968	Neural cell adhesion molecule L1 OS=Mus musculus OX=10090 GN=L1cam PE=1 SV=1
907	1702	tr|A0A2R8VHE5|A0A2R8VHE5_MOUSE	55.06	24	24	24	168000	174000	1	1	1	1		6316	3-mercaptopyruvate sulfurtransferase (Fragment) OS=Mus musculus OX=10090 GN=Mpst PE=1 SV=1
907	1704	tr|A0A2R8VHT1|A0A2R8VHT1_MOUSE	55.06	8	8	8	168000	174000	1	1	1	1		18977	3-mercaptopyruvate sulfurtransferase (Fragment) OS=Mus musculus OX=10090 GN=Mpst PE=1 SV=1
907	1706	Q99J99|THTM_MOUSE	55.06	4	4	4	168000	174000	1	1	1	1		33097	3-mercaptopyruvate sulfurtransferase OS=Mus musculus OX=10090 GN=Mpst PE=1 SV=4
1431	1699	Q9WV55|VAPA_MOUSE	54.7	6	6	0	2530000		1	1	1	0		27855	Vesicle-associated membrane protein-associated protein A OS=Mus musculus OX=10090 GN=Vapa PE=1 SV=2
616	1440	tr|A0A0J9YVF0|A0A0J9YVF0_MOUSE	54.54	3	0	3		404000	1	1	0	1		65786	Metabotropic glutamate receptor 2 OS=Mus musculus OX=10090 GN=Grm2 PE=1 SV=1
616	1441	Q14BI2|GRM2_MOUSE	54.54	2	0	2		404000	1	1	0	1		95887	Metabotropic glutamate receptor 2 OS=Mus musculus OX=10090 GN=Grm2 PE=1 SV=2
914	1739	P02802|MT1_MOUSE	54.33	20	20	20	278000	319000	1	1	1	1	Carbamidomethylation	6018	Metallothionein-1 OS=Mus musculus OX=10090 GN=Mt1 PE=1 SV=1
1433	1741	tr|Q8K1K2|Q8K1K2_MOUSE	54.08	4	0	4		386000	1	1	0	1		38752	26S proteasome regulatory subunit 8 OS=Mus musculus OX=10090 GN=Psmc5 PE=1 SV=1
1433	1742	P62196|PRS8_MOUSE	54.08	3	0	3		386000	1	1	0	1		45626	26S proteasome regulatory subunit 8 OS=Mus musculus OX=10090 GN=Psmc5 PE=1 SV=1
915	1752	tr|Q91V35|Q91V35_MOUSE	53.91	2	2	2	95900	171000	1	1	1	1		89842	Receptor-type tyrosine-protein phosphatase alpha OS=Mus musculus OX=10090 GN=Ptpra PE=1 SV=1
915	1753	P18052|PTPRA_MOUSE	53.91	1	1	1	95900	171000	1	1	1	1		93698	Receptor-type tyrosine-protein phosphatase alpha OS=Mus musculus OX=10090 GN=Ptpra PE=1 SV=3
618	1449	tr|E9QMK2|E9QMK2_MOUSE	53.89	1	0	1		1210000	1	1	0	1		178498	Versican core protein OS=Mus musculus OX=10090 GN=Vcan PE=1 SV=1
618	1450	tr|E9PYH0|E9PYH0_MOUSE	53.89	0	0	0		1210000	1	1	0	1		366895	Versican core protein OS=Mus musculus OX=10090 GN=Vcan PE=1 SV=1
618	1451	Q62059|CSPG2_MOUSE	53.89	0	0	0		1210000	1	1	0	1		366788	Versican core protein OS=Mus musculus OX=10090 GN=Vcan PE=1 SV=2
911	1718	tr|D3Z629|D3Z629_MOUSE	53.47	7	7	7	970000	880000	1	1	1	1	Carbamidomethylation	19091	60S ribosomal protein L9 OS=Mus musculus OX=10090 GN=Rpl9 PE=1 SV=1
911	1720	tr|S4R1R7|S4R1R7_MOUSE	53.47	6	6	6	970000	880000	1	1	1	1	Carbamidomethylation	21992	MCG50795 OS=Mus musculus OX=10090 GN=Rpl9-ps1 PE=4 SV=1
911	1719	tr|A0A0G2JES3|A0A0G2JES3_MOUSE	53.47	6	6	6	970000	880000	1	1	1	1	Carbamidomethylation	21741	60S ribosomal protein L9 (Fragment) OS=Mus musculus OX=10090 GN=Rpl9 PE=1 SV=1
911	1722	tr|A0A140T8T4|A0A140T8T4_MOUSE	53.47	6	6	6	970000	880000	1	1	1	1	Carbamidomethylation	21853	Ribosomal protein L9 pseudogene 6 OS=Mus musculus OX=10090 GN=Rpl9-ps6 PE=4 SV=1
911	1721	P51410|RL9_MOUSE	53.47	6	6	6	970000	880000	1	1	1	1	Carbamidomethylation	21881	60S ribosomal protein L9 OS=Mus musculus OX=10090 GN=Rpl9 PE=2 SV=2
917	1777	Q9ES97|RTN3_MOUSE	53.45	1	1	1	14200000	14400000	1	1	1	1		103879	Reticulon-3 OS=Mus musculus OX=10090 GN=Rtn3 PE=1 SV=2
913	1728	tr|A0A0A6YXS5|A0A0A6YXS5_MOUSE	53.19	4	4	4	142000	152000	1	1	1	1		34222	Type I inositol 3 4-bisphosphate 4-phosphatase OS=Mus musculus OX=10090 GN=Inpp4a PE=1 SV=1
913	1730	tr|A0A0R4J0Q2|A0A0R4J0Q2_MOUSE	53.19	2	2	2	142000	152000	1	1	1	1		76510	Type I inositol 3 4-bisphosphate 4-phosphatase OS=Mus musculus OX=10090 GN=Inpp4a PE=1 SV=1
913	1729	tr|F6R4N2|F6R4N2_MOUSE	53.19	2	2	2	142000	152000	1	1	1	1		76494	Type I inositol 3 4-bisphosphate 4-phosphatase OS=Mus musculus OX=10090 GN=Inpp4a PE=1 SV=1
913	1731	tr|E9QAD0|E9QAD0_MOUSE	53.19	2	2	2	142000	152000	1	1	1	1		77636	Type I inositol 3 4-bisphosphate 4-phosphatase OS=Mus musculus OX=10090 GN=Inpp4a PE=1 SV=1
913	1733	tr|Q3UEQ1|Q3UEQ1_MOUSE	53.19	1	1	1	142000	152000	1	1	1	1		99972	Type I inositol 3 4-bisphosphate 4-phosphatase OS=Mus musculus OX=10090 GN=Inpp4a PE=1 SV=1
913	1734	tr|E9Q9A0|E9Q9A0_MOUSE	53.19	1	1	1	142000	152000	1	1	1	1		105487	Type I inositol 3 4-bisphosphate 4-phosphatase OS=Mus musculus OX=10090 GN=Inpp4a PE=1 SV=2
913	1735	tr|F6V2U0|F6V2U0_MOUSE	53.19	1	1	1	142000	152000	1	1	1	1		105574	Type I inositol 3 4-bisphosphate 4-phosphatase OS=Mus musculus OX=10090 GN=Inpp4a PE=1 SV=1
913	1736	tr|D3YUD3|D3YUD3_MOUSE	53.19	1	1	1	142000	152000	1	1	1	1		107085	Type I inositol 3 4-bisphosphate 4-phosphatase OS=Mus musculus OX=10090 GN=Inpp4a PE=1 SV=2
913	1737	tr|D3YUL8|D3YUL8_MOUSE	53.19	1	1	1	142000	152000	1	1	1	1		109053	Type I inositol 3 4-bisphosphate 4-phosphatase OS=Mus musculus OX=10090 GN=Inpp4a PE=1 SV=1
913	1738	tr|D3Z230|D3Z230_MOUSE	53.19	1	1	1	142000	152000	1	1	1	1		109665	Type I inositol 3 4-bisphosphate 4-phosphatase OS=Mus musculus OX=10090 GN=Inpp4a PE=1 SV=1
285	1359	Q8CHH9|SEPT8_MOUSE	52.25	5	5	2	0		2	1	5	4	Carbamidomethylation	49812	Septin-8 OS=Mus musculus OX=10090 GN=Sept8 PE=1 SV=4
285	1360	tr|B7ZC46|B7ZC46_MOUSE	52.25	5	5	2	0		2	1	5	4	Carbamidomethylation	50896	Septin-8 OS=Mus musculus OX=10090 GN=Sept8 PE=1 SV=1
285	1361	tr|B1AQY9|B1AQY9_MOUSE	52.25	5	5	2	0		2	1	5	4	Carbamidomethylation	51146	Septin-8 OS=Mus musculus OX=10090 GN=Sept8 PE=1 SV=1
285	1362	tr|B1AQZ0|B1AQZ0_MOUSE	52.25	4	4	2	0		2	1	5	4	Carbamidomethylation	55874	Septin-8 OS=Mus musculus OX=10090 GN=Sept8 PE=1 SV=1
916	1764	O08756|HCD2_MOUSE	52.08	8	8	8	106000	130000	1	1	1	1		27419	3-hydroxyacyl-CoA dehydrogenase type-2 OS=Mus musculus OX=10090 GN=Hsd17b10 PE=1 SV=4
916	1763	tr|Q99N15|Q99N15_MOUSE	52.08	8	8	8	106000	130000	1	1	1	1		27274	17beta-hydroxysteroid dehydrogenase type 10/short chain L-3-hydroxyacyl-CoA dehydrogenase OS=Mus musculus OX=10090 GN=Hsd17b10 PE=1 SV=1
916	1765	tr|A2AFQ2|A2AFQ2_MOUSE	52.08	7	7	7	106000	130000	1	1	1	1		28374	3-hydroxyacyl-CoA dehydrogenase type-2 OS=Mus musculus OX=10090 GN=Hsd17b10 PE=1 SV=1
918	1779	Q8K4Z3|NNRE_MOUSE	51.4	4	4	4	1190000	1890000	1	1	1	1		30973	NAD(P)H-hydrate epimerase OS=Mus musculus OX=10090 GN=Naxe PE=1 SV=1
919	1781	Q8K0S0|PHYIP_MOUSE	51.16	4	4	4	1170000	1390000	1	1	1	1	Carbamidomethylation	37555	Phytanoyl-CoA hydroxylase-interacting protein OS=Mus musculus OX=10090 GN=Phyhip PE=1 SV=1
922	1792	Q9D8B4|NDUAB_MOUSE	51.14	8	8	8	1460000	1950000	1	1	1	1		14982	NADH dehydrogenase [ubiquinone] 1 alpha subcomplex subunit 11 OS=Mus musculus OX=10090 GN=Ndufa11 PE=1 SV=2
922	1793	tr|G5E814|G5E814_MOUSE	51.14	8	8	8	1460000	1950000	1	1	1	1		15115	MCG5603 OS=Mus musculus OX=10090 GN=Ndufa11 PE=1 SV=1
1435	1782	tr|A0A2I3BPH9|A0A2I3BPH9_MOUSE	50.83	10	10	0	0		1	1	1	0		12733	Protein FAM49B (Fragment) OS=Mus musculus OX=10090 GN=Fam49b PE=1 SV=1
1435	1794	tr|A0A2I3BRN5|A0A2I3BRN5_MOUSE	50.83	6	6	0	0		1	1	1	0		21733	Protein FAM49B (Fragment) OS=Mus musculus OX=10090 GN=Fam49b PE=1 SV=1
1435	1817	Q921M7|FA49B_MOUSE	50.83	3	3	0	0		1	1	1	0		36776	Protein FAM49B OS=Mus musculus OX=10090 GN=Fam49b PE=1 SV=1
923	1798	P14115|RL27A_MOUSE	50.53	7	7	7	1170000	1100000	1	1	1	1		16605	60S ribosomal protein L27a OS=Mus musculus OX=10090 GN=Rpl27a PE=1 SV=5
887	1783	tr|D3Z1H8|D3Z1H8_MOUSE	50.46	7	0	7		351000	1	1	0	1	Carbamidomethylation	20275	Glycolipid transfer protein OS=Mus musculus OX=10090 GN=Gltp PE=1 SV=1
887	1785	tr|D3Z1H9|D3Z1H9_MOUSE	50.46	6	0	6		351000	1	1	0	1	Carbamidomethylation	21535	Glycolipid transfer protein OS=Mus musculus OX=10090 GN=Gltp PE=1 SV=1
887	1786	Q9JL62|GLTP_MOUSE	50.46	6	0	6		351000	1	1	0	1	Carbamidomethylation	23690	Glycolipid transfer protein OS=Mus musculus OX=10090 GN=Gltp PE=1 SV=3
876	1526	O54774|AP3D1_MOUSE	50.46	1	0	1		108000	1	1	0	1		135081	AP-3 complex subunit delta-1 OS=Mus musculus OX=10090 GN=Ap3d1 PE=1 SV=1
921	1790	tr|D3Z2J6|D3Z2J6_MOUSE	50.38	5	5	5	234000	320000	1	1	1	1		29591	Thioredoxin-related transmembrane protein 2 OS=Mus musculus OX=10090 GN=Tmx2 PE=1 SV=1
921	1791	Q9D710|TMX2_MOUSE	50.38	4	4	4	234000	320000	1	1	1	1		33943	Thioredoxin-related transmembrane protein 2 OS=Mus musculus OX=10090 GN=Tmx2 PE=1 SV=1
927	1864	Q9Z2W0|DNPEP_MOUSE	50.17	2	2	2	85800	138000	1	1	1	1		52207	Aspartyl aminopeptidase OS=Mus musculus OX=10090 GN=Dnpep PE=1 SV=2
927	1865	tr|Q3TVK3|Q3TVK3_MOUSE	50.17	2	2	2	85800	138000	1	1	1	1		52466	Aspartyl aminopeptidase OS=Mus musculus OX=10090 GN=Dnpep PE=1 SV=1
1437	1839	P62627|DLRB1_MOUSE	50.17	12	12	0	554000		1	1	1	0		10990	Dynein light chain roadblock-type 1 OS=Mus musculus OX=10090 GN=Dynlrb1 PE=1 SV=3
1437	1840	tr|A2AVR9|A2AVR9_MOUSE	50.17	12	12	0	554000		1	1	1	0		11928	Dynein light chain roadblock OS=Mus musculus OX=10090 GN=Dynlrb1 PE=1 SV=1
924	1799	tr|A0A0G2JE32|A0A0G2JE32_MOUSE	50.01	8	8	8	1870000	1990000	1	1	1	1		14731	Ubiquitin-conjugating enzyme E2 D3 (Fragment) OS=Mus musculus OX=10090 GN=Ube2d3 PE=1 SV=1
924	1804	P62838|UB2D2_MOUSE	50.01	7	7	7	1870000	1990000	1	1	1	1		16735	Ubiquitin-conjugating enzyme E2 D2 OS=Mus musculus OX=10090 GN=Ube2d2 PE=1 SV=1
924	1803	Q6ZWY6|U2D2B_MOUSE	50.01	7	7	7	1870000	1990000	1	1	1	1		16659	Ubiquitin-conjugating enzyme E2 D2B OS=Mus musculus OX=10090 GN=Ube2d2b PE=1 SV=1
924	1802	P61079|UB2D3_MOUSE	50.01	7	7	7	1870000	1990000	1	1	1	1		16687	Ubiquitin-conjugating enzyme E2 D3 OS=Mus musculus OX=10090 GN=Ube2d3 PE=1 SV=1
924	1805	tr|A0A0G2JGL0|A0A0G2JGL0_MOUSE	50.01	7	7	7	1870000	1990000	1	1	1	1		16785	Ubiquitin-conjugating enzyme E2 D3 OS=Mus musculus OX=10090 GN=Ube2d3 PE=1 SV=1
920	1787	tr|F8WHP8|F8WHP8_MOUSE	49.96	16	16	16	7320000	9130000	1	1	1	1		9006	ATP synthase H+-transporting mitochondrial F0 complex subunit F2 OS=Mus musculus OX=10090 GN=Atp5j2 PE=1 SV=1
920	1789	P56135|ATPK_MOUSE	49.96	14	14	14	7320000	9130000	1	1	1	1		10344	ATP synthase subunit f mitochondrial OS=Mus musculus OX=10090 GN=Atp5mf PE=1 SV=3
1439	1850	tr|F7CDT0|F7CDT0_MOUSE	49.94	6	6	0	988000		1	1	1	0	Carbamidomethylation	19824	NEDD8-conjugating enzyme Ubc12 (Fragment) OS=Mus musculus OX=10090 GN=Ube2m PE=1 SV=1
1439	1851	tr|F6WMC0|F6WMC0_MOUSE	49.94	6	6	0	988000		1	1	1	0	Carbamidomethylation	19973	NEDD8-conjugating enzyme Ubc12 (Fragment) OS=Mus musculus OX=10090 GN=Ube2m PE=1 SV=1
1439	1853	P61082|UBC12_MOUSE	49.94	6	6	0	988000		1	1	1	0	Carbamidomethylation	20900	NEDD8-conjugating enzyme Ubc12 OS=Mus musculus OX=10090 GN=Ube2m PE=1 SV=1
1436	1784	P56375|ACYP2_MOUSE	49.87	12	0	12		673000	1	1	0	1		11878	Acylphosphatase-2 OS=Mus musculus OX=10090 GN=Acyp2 PE=1 SV=2
925	1842	Q9JKD3|SCAM5_MOUSE	49.55	5	5	5	3710000	4180000	1	1	1	1		26068	Secretory carrier-associated membrane protein 5 OS=Mus musculus OX=10090 GN=Scamp5 PE=1 SV=1
[truncated: 467 more rows]

## Sheet: Syndecan-batch 01
Protein Group	Protein ID	Accession	-10lgP	Coverage (%)	Coverage (%) Synd-01	Coverage (%) Synd-02	Area Synd-01	Area Synd-02	#Peptides	#Unique	#Spec Synd-01	#Spec Synd-02	PTM	Avg. Mass	Description
[truncated: 30 more rows]

[truncated: 7 more sheets: Syndecan-batch02, Neurocan-batch01, AGP_batch01, AGP-batch02, Aggrecan-batch01, Aggrecan-batch02, Aggrecan-noCSremoved]
