# Supplementary material for: Serial in-solution digestion protocol for mass spectrometry-based glycomics and proteomics analysis
Source: Royal Society of Chemistry journal article supplement (doi:10.1039/d0mo00019a), 2020-04-06
Supplement: d0mo00019a3.xlsx [file d0mo00019a3.xlsx]

## Sheet: human brain tissue lysate
Protein Group	Protein ID	Accession	-10lgP	Coverage (%)	Coverage (%) Sample 1	Area Sample 1	#Peptides	#Unique	#Spec Sample 1	PTM	Avg. Mass	Description
1	12	tr|A0A0D9SGF6|A0A0D9SGF6_HUMAN	416.35	48	48	1350000000	107	105	174	Carbamidomethylation; Deamidation N; HydroxylProline; Ubiquitination-K	287604	Spectrin alpha chain non-erythrocytic 1 OS=Homo sapiens OX=9606 GN=SPTAN1 PE=1 SV=1
10	14	Q01082|SPTB2_HUMAN	397.42	33	33	521000000	65	60	99	Carbamidomethylation; Oxidation (M); Deamidation N; HexNac; Ubiquitination-K	274608	Spectrin beta chain non-erythrocytic 1 OS=Homo sapiens OX=9606 GN=SPTBN1 PE=1 SV=2
2	120	P80723|BASP1_HUMAN	385.03	93	93	2980000000	53	53	140	Deamidation N; HydroxylProline; HexNac; HexNacHex; Ubiquitination-K; 2 more	22693	Brain acid soluble protein 1 OS=Homo sapiens OX=9606 GN=BASP1 PE=1 SV=2
14	23	P11137|MTAP2_HUMAN	321.67	26	26	225000000	48	48	68	Carbamidomethylation; Deamidation N; HexNac; Phosphoserine (pS)	199525	Microtubule-associated protein 2 OS=Homo sapiens OX=9606 GN=MAP2 PE=1 SV=4
5	4	P02768|ALBU_HUMAN	407.46	72	72	2860000000	47	47	133	Carbamidomethylation; Oxidation (M); Deamidation N	69367	Serum albumin OS=Homo sapiens OX=9606 GN=ALB PE=1 SV=2
22	55	P07197|NFM_HUMAN	286.7	35	35	328000000	36	33	66	Deamidation N; HydroxylProline; Ubiquitination-K; Phosphoserine (pS)	102472	Neurofilament medium polypeptide OS=Homo sapiens OX=9606 GN=NEFM PE=1 SV=3
27	231	P17677|NEUM_HUMAN	345.39	81	81	448000000	30	30	60	Deamidation N; HydroxylProline; Ubiquitination-K; Phosphoserine (pS)	24803	Neuromodulin OS=Homo sapiens OX=9606 GN=GAP43 PE=1 SV=1
37	28	P17600|SYN1_HUMAN	301.75	56	56	201000000	28	27	45	Deamidation N	74111	Synapsin-1 OS=Homo sapiens OX=9606 GN=SYN1 PE=1 SV=3
39	29	Q12860|CNTN1_HUMAN	299	31	31	214000000	25	25	45	Carbamidomethylation; Deamidation N	113320	Contactin-1 OS=Homo sapiens OX=9606 GN=CNTN1 PE=1 SV=1
18	74	P13611|CSPG2_HUMAN	306.41	7	7	1720000000	23	23	66	Carbamidomethylation; Deamidation N	372821	Versican core protein OS=Homo sapiens OX=9606 GN=VCAN PE=1 SV=3
47	61	P25705|ATPA_HUMAN	269.15	36	36	291000000	22	22	35	Deamidation N	59751	ATP synthase subunit alpha mitochondrial OS=Homo sapiens OX=9606 GN=ATP5A1 PE=1 SV=1
64	60	P32004|L1CAM_HUMAN	253.38	21	21	106000000	22	22	34	Carbamidomethylation; Deamidation N; HydroxylProline; HexNac	140003	Neural cell adhesion molecule L1 OS=Homo sapiens OX=9606 GN=L1CAM PE=1 SV=2
20	37	P06576|ATPB_HUMAN	297.1	45	45	869000000	21	21	55	Deamidation N	56560	ATP synthase subunit beta mitochondrial OS=Homo sapiens OX=9606 GN=ATP5B PE=1 SV=3
23	377	P0DP23|CALM1_HUMAN	291.23	57	57	1850000000	20	20	61	Oxidation (M); Deamidation N	16838	Calmodulin-1 OS=Homo sapiens OX=9606 GN=CALM1 PE=1 SV=1
23	376	P0DP25|CALM3_HUMAN	291.23	57	57	1850000000	20	20	61	Oxidation (M); Deamidation N	16838	Calmodulin-3 OS=Homo sapiens OX=9606 GN=CALM3 PE=1 SV=1
23	375	P0DP24|CALM2_HUMAN	291.23	57	57	1850000000	20	20	61	Oxidation (M); Deamidation N	16838	Calmodulin-2 OS=Homo sapiens OX=9606 GN=CALM2 PE=1 SV=1
23	378	tr|E7ETZ0|E7ETZ0_HUMAN	291.23	57	57	1850000000	20	20	61	Oxidation (M); Deamidation N	16966	Calmodulin-1 OS=Homo sapiens OX=9606 GN=CALM1 PE=1 SV=1
23	379	tr|H0Y7A7|H0Y7A7_HUMAN	291.23	45	45	1850000000	20	20	61	Oxidation (M); Deamidation N	20762	Calmodulin-2 (Fragment) OS=Homo sapiens OX=9606 GN=CALM2 PE=1 SV=1
23	380	tr|E7EMB3|E7EMB3_HUMAN	291.23	43	43	1850000000	20	20	61	Oxidation (M); Deamidation N	21689	Calmodulin-2 OS=Homo sapiens OX=9606 GN=CALM2 PE=1 SV=1
84	42	P08133|ANXA6_HUMAN	256.96	33	33	64600000	19	19	21	Deamidation N	75873	Annexin A6 OS=Homo sapiens OX=9606 GN=ANXA6 PE=1 SV=3
78	97	P10809|CH60_HUMAN	230.58	37	37	101000000	19	19	28	Carbamidomethylation; Deamidation N	61055	60 kDa heat shock protein mitochondrial OS=Homo sapiens OX=9606 GN=HSPD1 PE=1 SV=2
34	24	P46821|MAP1B_HUMAN	275.71	11	11	56200000	20	18	24	Carbamidomethylation; Deamidation N	270632	Microtubule-associated protein 1B OS=Homo sapiens OX=9606 GN=MAP1B PE=1 SV=2
57	71	P17174|AATC_HUMAN	273.77	53	53	251000000	18	18	33	Carbamidomethylation; Deamidation N; HydroxylProline; Methoxy-K; HexNac	46248	Aspartate aminotransferase cytoplasmic OS=Homo sapiens OX=9606 GN=GOT1 PE=1 SV=3
51	224	P29966|MARCS_HUMAN	266.94	59	59	156000000	18	18	30	Deamidation N; HydroxylProline; Ubiquitination-K; Phosphoserine (pS)	31555	Myristoylated alanine-rich C-kinase substrate OS=Homo sapiens OX=9606 GN=MARCKS PE=1 SV=4
59	70	P07196|NFL_HUMAN	228.74	35	35	172000000	21	18	35	Carbamidomethylation; Deamidation N; HexNacHex; HLys-Hex; Phosphoserine (pS)	61517	Neurofilament light polypeptide OS=Homo sapiens OX=9606 GN=NEFL PE=1 SV=3
50	156	P07602|SAP_HUMAN	224.07	21	21	978000000	18	18	39	Carbamidomethylation; Deamidation N; HexNacHex	58113	Prosaposin OS=Homo sapiens OX=9606 GN=PSAP PE=1 SV=2
50	157	tr|C9JIZ6|C9JIZ6_HUMAN	224.07	21	21	978000000	18	18	39	Carbamidomethylation; Deamidation N; HexNacHex	58441	Prosaposin OS=Homo sapiens OX=9606 GN=PSAP PE=1 SV=2
41	26	tr|I6L894|I6L894_HUMAN	269.38	6	6	31100000	18	17	19	Carbamidomethylation	430259	Ankyrin-2 OS=Homo sapiens OX=9606 GN=ANK2 PE=1 SV=1
41	27	Q01484|ANK2_HUMAN	269.38	6	6	31100000	18	17	19	Carbamidomethylation	433719	Ankyrin-2 OS=Homo sapiens OX=9606 GN=ANK2 PE=1 SV=4
55	104	P62760|VISL1_HUMAN	258.2	86	86	305000000	19	17	37	Carbamidomethylation; Deamidation N; HexNac; HexNacHex	22142	Visinin-like protein 1 OS=Homo sapiens OX=9606 GN=VSNL1 PE=1 SV=2
88	76	tr|A0A0D9SG72|A0A0D9SG72_HUMAN	257.4	41	41	73900000	18	17	25	Carbamidomethylation; Deamidation N	66161	Syntaxin-binding protein 1 OS=Homo sapiens OX=9606 GN=STXBP1 PE=1 SV=2
88	77	P61764|STXB1_HUMAN	257.4	40	40	73900000	18	17	25	Carbamidomethylation; Deamidation N	67569	Syntaxin-binding protein 1 OS=Homo sapiens OX=9606 GN=STXBP1 PE=1 SV=1
54	40	P11142|HSP7C_HUMAN	253.23	34	34	121000000	21	17	28	Carbamidomethylation; Deamidation N	70898	Heat shock cognate 71 kDa protein OS=Homo sapiens OX=9606 GN=HSPA8 PE=1 SV=1
33	118	P12277|KCRB_HUMAN	288.7	61	61	528000000	18	16	51	Carbamidomethylation; Deamidation N; HydroxylProline; HexNac	42644	Creatine kinase B-type OS=Homo sapiens OX=9606 GN=CKB PE=1 SV=1
45	62	P78559|MAP1A_HUMAN	245.92	8	8	29300000	18	16	23	Carbamidomethylation; Deamidation N	305484	Microtubule-associated protein 1A OS=Homo sapiens OX=9606 GN=MAP1A PE=1 SV=6
45	63	tr|E9PGC8|E9PGC8_HUMAN	245.92	7	7	29300000	18	16	23	Carbamidomethylation; Deamidation N	331259	Microtubule-associated protein 1A OS=Homo sapiens OX=9606 GN=MAP1A PE=1 SV=1
99	94	tr|C9JYY6|C9JYY6_HUMAN	241.9	19	19	63600000	16	16	20	Carbamidomethylation; Deamidation N	133813	Neuronal cell adhesion molecule OS=Homo sapiens OX=9606 GN=NRCAM PE=1 SV=3
99	96	Q92823|NRCAM_HUMAN	241.9	18	18	63600000	16	16	20	Carbamidomethylation; Deamidation N	143889	Neuronal cell adhesion molecule OS=Homo sapiens OX=9606 GN=NRCAM PE=1 SV=3
65	124	Q96GW7|PGCB_HUMAN	238.56	15	15	220000000	16	16	32	Carbamidomethylation; Deamidation N	99118	Brevican core protein OS=Homo sapiens OX=9606 GN=BCAN PE=1 SV=2
36	123	P62258|1433E_HUMAN	284.71	55	55	436000000	18	15	48	Carbamidomethylation; Deamidation N	29174	14-3-3 protein epsilon OS=Homo sapiens OX=9606 GN=YWHAE PE=1 SV=1
52	38	P04264|K2C1_HUMAN	281.74	38	38	97400000	23	15	34	Carbamidomethylation; Oxidation (M); Deamidation N; HexNacHex	66039	Keratin type II cytoskeletal 1 OS=Homo sapiens OX=9606 GN=KRT1 PE=1 SV=6
60	112	P09471|GNAO_HUMAN	243.44	42	42	251000000	16	15	34	Carbamidomethylation; Deamidation N; HexNac	40051	Guanine nucleotide-binding protein G(o) subunit alpha OS=Homo sapiens OX=9606 GN=GNAO1 PE=1 SV=4
75	52	P08670|VIME_HUMAN	238.59	40	40	86400000	19	15	27	Carbamidomethylation; Deamidation N	53652	Vimentin OS=Homo sapiens OX=9606 GN=VIM PE=1 SV=4
130	113	P54289|CA2D1_HUMAN	218.32	16	16	33400000	16	15	16	Carbamidomethylation; Deamidation N	124568	Voltage-dependent calcium channel subunit alpha-2/delta-1 OS=Homo sapiens OX=9606 GN=CACNA2D1 PE=1 SV=3
114	228	P00505|AATM_HUMAN	211.97	32	32	85400000	15	15	19	Carbamidomethylation; Deamidation N	47518	Aspartate aminotransferase mitochondrial OS=Homo sapiens OX=9606 GN=GOT2 PE=1 SV=3
30	181	P04179|SODM_HUMAN	284.09	68	68	616000000	14	14	49	Deamidation N	24750	Superoxide dismutase [Mn] mitochondrial OS=Homo sapiens OX=9606 GN=SOD2 PE=1 SV=3
56	50	tr|A0A1C7CYX9|A0A1C7CYX9_HUMAN	281.3	39	39	215000000	19	14	33	Carbamidomethylation; Deamidation N	73503	Dihydropyrimidinase-related protein 2 OS=Homo sapiens OX=9606 GN=DPYSL2 PE=1 SV=1
44	31	P07900|HS90A_HUMAN	270.36	34	34	94000000	25	14	40	Carbamidomethylation; Deamidation N	84660	Heat shock protein HSP 90-alpha OS=Homo sapiens OX=9606 GN=HSP90AA1 PE=1 SV=5
66	233	tr|A0A0D9SF30|A0A0D9SF30_HUMAN	266.73	48	48	117000000	19	14	32	Deamidation N; Phosphoserine (pS)	47136	Neural cell adhesion molecule 1 (Fragment) OS=Homo sapiens OX=9606 GN=NCAM1 PE=1 SV=1
69	172	P06744|G6PI_HUMAN	258.4	28	28	140000000	14	14	28	Deamidation N	63147	Glucose-6-phosphate isomerase OS=Homo sapiens OX=9606 GN=GPI PE=1 SV=4
69	173	tr|A0A0A0MTS2|A0A0A0MTS2_HUMAN	258.4	27	27	140000000	14	14	28	Deamidation N	64825	Glucose-6-phosphate isomerase (Fragment) OS=Homo sapiens OX=9606 GN=GPI PE=1 SV=1
38	109	P40925|MDHC_HUMAN	249.04	49	49	738000000	14	14	47	Carbamidomethylation; Deamidation N	36426	Malate dehydrogenase cytoplasmic OS=Homo sapiens OX=9606 GN=MDH1 PE=1 SV=4
101	128	Q92752|TENR_HUMAN	222.26	12	12	112000000	14	14	21	Deamidation N	149561	Tenascin-R OS=Homo sapiens OX=9606 GN=TNR PE=1 SV=3
104	186	Q15149|PLEC_HUMAN	160.36	3	3	17800000	15	14	15		531796	Plectin OS=Homo sapiens OX=9606 GN=PLEC PE=1 SV=3
49	121	P40926|MDHM_HUMAN	247.91	49	49	740000000	13	13	39	Carbamidomethylation; Deamidation N	35503	Malate dehydrogenase mitochondrial OS=Homo sapiens OX=9606 GN=MDH2 PE=1 SV=3
139	136	Q13228|SBP1_HUMAN	247.01	38	38	43100000	13	13	15	Carbamidomethylation; Deamidation N	52391	Selenium-binding protein 1 OS=Homo sapiens OX=9606 GN=SELENBP1 PE=1 SV=2
140	229	O14594|NCAN_HUMAN	231.94	15	15	58600000	13	13	15	Carbamidomethylation; Deamidation N	143093	Neurocan core protein OS=Homo sapiens OX=9606 GN=NCAN PE=1 SV=3
138	91	tr|I3L0N3|I3L0N3_HUMAN	231.65	22	22	89800000	14	13	14	Carbamidomethylation; Deamidation N	82092	Vesicle-fusing ATPase OS=Homo sapiens OX=9606 GN=NSF PE=1 SV=1
138	92	P46459|NSF_HUMAN	231.65	22	22	89800000	14	13	14	Carbamidomethylation; Deamidation N	82594	Vesicle-fusing ATPase OS=Homo sapiens OX=9606 GN=NSF PE=1 SV=3
100	142	P11021|BIP_HUMAN	229.39	26	26	67200000	14	13	20	Deamidation N	72333	Endoplasmic reticulum chaperone BiP OS=Homo sapiens OX=9606 GN=HSPA5 PE=1 SV=2
107	137	P21579|SYT1_HUMAN	214.12	33	33	92300000	13	13	21	Carbamidomethylation; Deamidation N	47573	Synaptotagmin-1 OS=Homo sapiens OX=9606 GN=SYT1 PE=1 SV=1
68	153	P04406|G3P_HUMAN	240.22	41	41	245000000	13	12	31	Carbamidomethylation; Deamidation N; HydroxylProline	36053	Glyceraldehyde-3-phosphate dehydrogenase OS=Homo sapiens OX=9606 GN=GAPDH PE=1 SV=3
118	163	P35527|K1C9_HUMAN	239.31	32	32	23200000	13	12	18	Oxidation (M); Deamidation N	62064	Keratin type I cytoskeletal 9 OS=Homo sapiens OX=9606 GN=KRT9 PE=1 SV=3
96	148	P09622|DLDH_HUMAN	238.86	29	29	152000000	12	12	24	Carbamidomethylation; Deamidation N	54177	Dihydrolipoyl dehydrogenase mitochondrial OS=Homo sapiens OX=9606 GN=DLD PE=1 SV=2
106	108	P06733|ENOA_HUMAN	229.33	47	47	55600000	15	12	20	Carbamidomethylation; Deamidation N	47169	Alpha-enolase OS=Homo sapiens OX=9606 GN=ENO1 PE=1 SV=2
120	146	O94760|DDAH1_HUMAN	216.03	54	54	79400000	13	12	19	Carbamidomethylation; Deamidation N	31122	N(G) N(G)-dimethylarginine dimethylaminohydrolase 1 OS=Homo sapiens OX=9606 GN=DDAH1 PE=1 SV=3
159	110	tr|H9KV31|H9KV31_HUMAN	192.88	16	16	32300000	12	12	12	Carbamidomethylation	91123	Neural cell adhesion molecule 2 OS=Homo sapiens OX=9606 GN=NCAM2 PE=1 SV=2
159	111	O15394|NCAM2_HUMAN	192.88	16	16	32300000	12	12	12	Carbamidomethylation	93046	Neural cell adhesion molecule 2 OS=Homo sapiens OX=9606 GN=NCAM2 PE=1 SV=2
90	244	P61266|STX1B_HUMAN	244.16	33	33	157000000	12	11	26	Deamidation N	33245	Syntaxin-1B OS=Homo sapiens OX=9606 GN=STX1B PE=1 SV=1
89	278	P02794|FRIH_HUMAN	240.17	64	64	224000000	11	11	25	Carbamidomethylation; Deamidation N	21226	Ferritin heavy chain OS=Homo sapiens OX=9606 GN=FTH1 PE=1 SV=2
79	199	tr|F5H5G1|F5H5G1_HUMAN	230.37	44	44	152000000	11	11	29	Carbamidomethylation; Deamidation N	31742	Limbic system-associated membrane protein OS=Homo sapiens OX=9606 GN=LSAMP PE=1 SV=2
79	200	Q13449|LSAMP_HUMAN	230.37	37	37	152000000	11	11	29	Carbamidomethylation; Deamidation N	37394	Limbic system-associated membrane protein OS=Homo sapiens OX=9606 GN=LSAMP PE=1 SV=2
79	201	tr|H3BLU2|H3BLU2_HUMAN	230.37	37	37	152000000	11	11	29	Carbamidomethylation; Deamidation N	38014	Limbic system-associated membrane protein (Fragment) OS=Homo sapiens OX=9606 GN=LSAMP PE=1 SV=1
98	221	P05026|AT1B1_HUMAN	226.86	41	41	372000000	11	11	24	Carbamidomethylation; Deamidation N	35061	Sodium/potassium-transporting ATPase subunit beta-1 OS=Homo sapiens OX=9606 GN=ATP1B1 PE=1 SV=1
121	193	P09936|UCHL1_HUMAN	225.71	66	66	195000000	11	11	18	Carbamidomethylation; Deamidation N	24824	Ubiquitin carboxyl-terminal hydrolase isozyme L1 OS=Homo sapiens OX=9606 GN=UCHL1 PE=1 SV=2
133	323	P62937|PPIA_HUMAN	222.56	67	67	122000000	11	11	18	Carbamidomethylation; Deamidation N	18012	Peptidyl-prolyl cis-trans isomerase A OS=Homo sapiens OX=9606 GN=PPIA PE=1 SV=2
141	164	tr|A0A0B4J1R6|A0A0B4J1R6_HUMAN	219.97	32	32	78300000	11	11	14	Deamidation N	49910	Transketolase OS=Homo sapiens OX=9606 GN=TKT PE=1 SV=1
141	167	P29401|TKT_HUMAN	219.97	23	23	78300000	11	11	14	Deamidation N	67878	Transketolase OS=Homo sapiens OX=9606 GN=TKT PE=1 SV=3
111	159	P13645|K1C10_HUMAN	215.34	24	24	60600000	14	11	20	Oxidation (M); Deamidation N	58827	Keratin type I cytoskeletal 10 OS=Homo sapiens OX=9606 GN=KRT10 PE=1 SV=6
112	188	P49418|AMPH_HUMAN	206.13	24	24	89500000	11	11	16	Deamidation N; Methoxy-K; HexNac	76257	Amphiphysin OS=Homo sapiens OX=9606 GN=AMPH PE=1 SV=1
160	212	Q96KP4|CNDP2_HUMAN	200.05	35	35	24300000	11	11	14	Deamidation N	52879	Cytosolic non-specific dipeptidase OS=Homo sapiens OX=9606 GN=CNDP2 PE=1 SV=2
109	177	P60880|SNP25_HUMAN	234.45	54	54	76800000	10	10	18	Deamidation N	23315	Synaptosomal-associated protein 25 OS=Homo sapiens OX=9606 GN=SNAP25 PE=1 SV=1
113	145	P60174|TPIS_HUMAN	224.5	45	45	93300000	10	10	18	Carbamidomethylation; Deamidation N	30791	Triosephosphate isomerase OS=Homo sapiens OX=9606 GN=TPI1 PE=1 SV=3
124	364	P20674|COX5A_HUMAN	221.81	64	64	244000000	10	10	19	Deamidation N	16762	Cytochrome c oxidase subunit 5A mitochondrial OS=Homo sapiens OX=9606 GN=COX5A PE=1 SV=2
123	241	Q8N3J6|CADM2_HUMAN	214.08	30	30	215000000	10	10	19	Carbamidomethylation; Deamidation N	47554	Cell adhesion molecule 2 OS=Homo sapiens OX=9606 GN=CADM2 PE=2 SV=1
149	151	Q9UMF0|ICAM5_HUMAN	212.23	14	14	43100000	10	10	15	Carbamidomethylation	97116	Intercellular adhesion molecule 5 OS=Homo sapiens OX=9606 GN=ICAM5 PE=1 SV=3
82	310	P02686|MBP_HUMAN	192.53	24	24	310000000	10	10	26		33117	Myelin basic protein OS=Homo sapiens OX=9606 GN=MBP PE=1 SV=3
150	183	Q9Y617|SERC_HUMAN	191.78	32	32	59400000	10	10	15	Carbamidomethylation; Deamidation N	40423	Phosphoserine aminotransferase OS=Homo sapiens OX=9606 GN=PSAT1 PE=1 SV=2
63	650	P00441|SODC_HUMAN	259.86	60	60	928000000	9	9	35	Carbamidomethylation; Deamidation N; Methoxy-K; HexNac	15936	Superoxide dismutase [Cu-Zn] OS=Homo sapiens OX=9606 GN=SOD1 PE=1 SV=2
35	122	P68871|HBB_HUMAN	248.62	95	95	373000000	16	9	51	Carbamidomethylation; Oxidation (M); Deamidation N	15998	Hemoglobin subunit beta OS=Homo sapiens OX=9606 GN=HBB PE=1 SV=2
134	330	tr|A0A0C4DFZ1|A0A0C4DFZ1_HUMAN	223.49	35	35	139000000	10	9	17	Deamidation N	29573	Syntaxin-1A OS=Homo sapiens OX=9606 GN=STX1A PE=1 SV=1
134	332	tr|A8MZ54|A8MZ54_HUMAN	223.49	32	32	139000000	10	9	17	Deamidation N	31608	Syntaxin-1A OS=Homo sapiens OX=9606 GN=STX1A PE=1 SV=1
134	333	Q16623|STX1A_HUMAN	223.49	32	32	139000000	10	9	17	Deamidation N	33023	Syntaxin-1A OS=Homo sapiens OX=9606 GN=STX1A PE=1 SV=1
122	249	P23471|PTPRZ_HUMAN	205.59	5	5	133000000	9	9	15	Deamidation N	254585	Receptor-type tyrosine-protein phosphatase zeta OS=Homo sapiens OX=9606 GN=PTPRZ1 PE=1 SV=4
143	272	P27824|CALX_HUMAN	183.85	18	18	27900000	9	9	14	Deamidation N; HydroxylProline; Ubiquitination-K	67568	Calnexin OS=Homo sapiens OX=9606 GN=CANX PE=1 SV=2
163	293	tr|C9J406|C9J406_HUMAN	167.09	14	14	26900000	9	9	12	HydroxylProline; Ubiquitination-K	73254	MICOS complex subunit MIC60 OS=Homo sapiens OX=9606 GN=IMMT PE=1 SV=1
194	226	P00738|HPT_HUMAN	159.87	21	21	19600000	9	9	10	Carbamidomethylation	45205	Haptoglobin OS=Homo sapiens OX=9606 GN=HP PE=1 SV=1
232	291	P26232|CTNA2_HUMAN	151.69	11	11	6830000	9	9	9	Carbamidomethylation; Deamidation N	105313	Catenin alpha-2 OS=Homo sapiens OX=9606 GN=CTNNA2 PE=1 SV=5
85	34	P05023|AT1A1_HUMAN	247.62	25	25	20400000	21	8	26	Carbamidomethylation; Deamidation N	112896	Sodium/potassium-transporting ATPase subunit alpha-1 OS=Homo sapiens OX=9606 GN=ATP1A1 PE=1 SV=1
117	79	tr|A0A0D9SFB1|A0A0D9SFB1_HUMAN	216.63	17	17	17100000	14	8	16		94017	Dynamin-1 OS=Homo sapiens OX=9606 GN=DNM1 PE=1 SV=1
117	81	Q05193|DYN1_HUMAN	216.63	17	17	17100000	14	8	16		97408	Dynamin-1 OS=Homo sapiens OX=9606 GN=DNM1 PE=1 SV=2
117	80	tr|A0A0D9SFE4|A0A0D9SFE4_HUMAN	216.63	17	17	17100000	14	8	16		97238	Dynamin-1 OS=Homo sapiens OX=9606 GN=DNM1 PE=1 SV=1
152	251	tr|E9PR44|E9PR44_HUMAN	213.31	57	57	92900000	8	8	13	Deamidation N	20031	Alpha-crystallin B chain (Fragment) OS=Homo sapiens OX=9606 GN=CRYAB PE=1 SV=1
152	252	P02511|CRYAB_HUMAN	213.31	57	57	92900000	8	8	13	Deamidation N	20159	Alpha-crystallin B chain OS=Homo sapiens OX=9606 GN=CRYAB PE=1 SV=2
148	208	P09104|ENOG_HUMAN	210.92	37	37	48100000	10	8	15	Carbamidomethylation; Deamidation N	47269	Gamma-enolase OS=Homo sapiens OX=9606 GN=ENO2 PE=1 SV=3
166	429	P43004|EAA2_HUMAN	205.92	15	15	75800000	8	8	14	Carbamidomethylation; Deamidation N	62104	Excitatory amino acid transporter 2 OS=Homo sapiens OX=9606 GN=SLC1A2 PE=1 SV=2
151	311	Q9BY11|PACN1_HUMAN	202.98	23	23	36300000	8	8	13	Carbamidomethylation; Deamidation N	50966	Protein kinase C and casein kinase substrate in neurons protein 1 OS=Homo sapiens OX=9606 GN=PACSIN1 PE=1 SV=1
147	161	P0DMV9|HS71B_HUMAN	199.22	22	22	13600000	13	8	15	Carbamidomethylation; Deamidation N	70052	Heat shock 70 kDa protein 1B OS=Homo sapiens OX=9606 GN=HSPA1B PE=1 SV=1
147	160	P0DMV8|HS71A_HUMAN	199.22	22	22	13600000	13	8	15	Carbamidomethylation; Deamidation N	70052	Heat shock 70 kDa protein 1A OS=Homo sapiens OX=9606 GN=HSPA1A PE=1 SV=1
147	162	tr|A0A0G2JIW1|A0A0G2JIW1_HUMAN	199.22	22	22	13600000	13	8	15	Carbamidomethylation; Deamidation N	70109	Heat shock 70 kDa protein 1B OS=Homo sapiens OX=9606 GN=HSPA1B PE=1 SV=1
173	217	tr|A8MVZ9|A8MVZ9_HUMAN	195.65	30	30	15500000	9	8	13	Deamidation N	36295	Fructose-bisphosphate aldolase OS=Homo sapiens OX=9606 GN=ALDOC PE=1 SV=1
173	218	P09972|ALDOC_HUMAN	195.65	28	28	15500000	9	8	13	Deamidation N	39456	Fructose-bisphosphate aldolase C OS=Homo sapiens OX=9606 GN=ALDOC PE=1 SV=2
165	470	Q8N126|CADM3_HUMAN	189.4	28	28	31300000	8	8	12	Carbamidomethylation; Deamidation N	43300	Cell adhesion molecule 3 OS=Homo sapiens OX=9606 GN=CADM3 PE=1 SV=1
184	219	Q9H115|SNAB_HUMAN	184.88	30	30	33800000	8	8	11	Carbamidomethylation	33557	Beta-soluble NSF attachment protein OS=Homo sapiens OX=9606 GN=NAPB PE=1 SV=2
184	220	tr|A0A087WZQ7|A0A087WZQ7_HUMAN	184.88	29	29	33800000	8	8	11	Carbamidomethylation	33917	Beta-soluble NSF attachment protein OS=Homo sapiens OX=9606 GN=NAPB PE=1 SV=1
183	195	P07195|LDHB_HUMAN	183.77	26	26	15900000	9	8	10	Carbamidomethylation	36639	L-lactate dehydrogenase B chain OS=Homo sapiens OX=9606 GN=LDHB PE=1 SV=2
142	170	Q16352|AINX_HUMAN	179.85	18	18	48100000	11	8	16		55391	Alpha-internexin OS=Homo sapiens OX=9606 GN=INA PE=1 SV=2
235	568	P22695|QCR2_HUMAN	179.52	29	29	9490000	8	8	9	Carbamidomethylation; Deamidation N	48443	Cytochrome b-c1 complex subunit 2 mitochondrial OS=Homo sapiens OX=9606 GN=UQCRC2 PE=1 SV=3
153	370	Q9UHG2|PCSK1_HUMAN	178.13	38	38	117000000	8	8	15	Deamidation N	27372	ProSAAS OS=Homo sapiens OX=9606 GN=PCSK1N PE=1 SV=1
234	214	P14314|GLU2B_HUMAN	176.86	19	19	13400000	8	8	9	Carbamidomethylation	59426	Glucosidase 2 subunit beta OS=Homo sapiens OX=9606 GN=PRKCSH PE=1 SV=2
234	215	tr|K7ELL7|K7ELL7_HUMAN	176.86	19	19	13400000	8	8	9	Carbamidomethylation	60192	Glucosidase 2 subunit beta OS=Homo sapiens OX=9606 GN=PRKCSH PE=1 SV=1
233	198	Q96JE9|MAP6_HUMAN	162.52	13	13	14000000	8	8	8		86505	Microtubule-associated protein 6 OS=Homo sapiens OX=9606 GN=MAP6 PE=1 SV=2
193	197	Q02952|AKA12_HUMAN	161.04	6	6	12400000	8	8	8		191480	A-kinase anchor protein 12 OS=Homo sapiens OX=9606 GN=AKAP12 PE=1 SV=4
238	745	P27797|CALR_HUMAN	146.51	28	28	18100000	8	8	9	Carbamidomethylation; Deamidation N	48142	Calreticulin OS=Homo sapiens OX=9606 GN=CALR PE=1 SV=1
32	106	P63261|ACTG_HUMAN	282.77	61	61	230000000	24	7	51	Carbamidomethylation; Oxidation (M); Deamidation N; HexNac	41793	Actin cytoplasmic 2 OS=Homo sapiens OX=9606 GN=ACTG1 PE=1 SV=1
71	46	tr|M0R116|M0R116_HUMAN	253.78	28	28	31400000	21	7	31	Carbamidomethylation; Deamidation N	108279	Sodium/potassium-transporting ATPase subunit alpha OS=Homo sapiens OX=9606 GN=ATP1A3 PE=1 SV=1
71	48	P13637|AT1A3_HUMAN	253.78	27	27	31400000	21	7	31	Carbamidomethylation; Deamidation N	111748	Sodium/potassium-transporting ATPase subunit alpha-3 OS=Homo sapiens OX=9606 GN=ATP1A3 PE=1 SV=3
71	49	tr|A0A0A0MT26|A0A0A0MT26_HUMAN	253.78	22	22	31400000	21	7	31	Carbamidomethylation; Deamidation N	133317	Sodium/potassium-transporting ATPase subunit alpha-3 OS=Homo sapiens OX=9606 GN=ATP1A3 PE=1 SV=1
182	247	Q00610|CLH1_HUMAN	230.12	11	11	6310000	11	7	12	Carbamidomethylation; Deamidation N	191613	Clathrin heavy chain 1 OS=Homo sapiens OX=9606 GN=CLTC PE=1 SV=5
182	248	tr|A0A087WVQ6|A0A087WVQ6_HUMAN	230.12	11	11	6310000	11	7	12	Carbamidomethylation; Deamidation N	192057	Clathrin heavy chain OS=Homo sapiens OX=9606 GN=CLTC PE=1 SV=1
115	347	tr|A0A087WWU8|A0A087WWU8_HUMAN	211.84	32	32	50700000	11	7	19		26421	Tropomyosin alpha-3 chain OS=Homo sapiens OX=9606 GN=TPM3 PE=1 SV=1
162	242	P21796|VDAC1_HUMAN	204.78	39	39	48800000	8	7	12	Carbamidomethylation; Deamidation N	30773	Voltage-dependent anion-selective channel protein 1 OS=Homo sapiens OX=9606 GN=VDAC1 PE=1 SV=2
119	98	Q9UQM7|KCC2A_HUMAN	203.78	30	30	31400000	14	7	18	Carbamidomethylation; Deamidation N	54088	Calcium/calmodulin-dependent protein kinase type II subunit alpha OS=Homo sapiens OX=9606 GN=CAMK2A PE=1 SV=2
197	336	P30086|PEBP1_HUMAN	188.63	48	48	70100000	7	7	11	Carbamidomethylation; Deamidation N	21057	Phosphatidylethanolamine-binding protein 1 OS=Homo sapiens OX=9606 GN=PEBP1 PE=1 SV=3
280	418	P23515|OMGP_HUMAN	183.54	16	16	53300000	7	7	8	Carbamidomethylation	49608	Oligodendrocyte-myelin glycoprotein OS=Homo sapiens OX=9606 GN=OMG PE=1 SV=2
195	292	Q9NQC3|RTN4_HUMAN	181.44	9	9	28600000	8	7	10	Carbamidomethylation; Deamidation N	129931	Reticulon-4 OS=Homo sapiens OX=9606 GN=RTN4 PE=1 SV=2
268	273	P36957|ODO2_HUMAN	178.97	16	16	47400000	7	7	8		48755	Dihydrolipoyllysine-residue succinyltransferase component of 2-oxoglutarate dehydrogenase complex mitochondrial OS=Homo sapiens OX=9606 GN=DLST PE=1 SV=4
236	255	tr|A0A1B0GVP3|A0A1B0GVP3_HUMAN	176.83	20	20	37700000	7	7	9	Carbamidomethylation; Deamidation N	43687	Cathepsin D OS=Homo sapiens OX=9606 GN=CTSD PE=1 SV=1
236	254	tr|A0A1B0GW44|A0A1B0GW44_HUMAN	176.83	20	20	37700000	7	7	9	Carbamidomethylation; Deamidation N	43688	Cathepsin D OS=Homo sapiens OX=9606 GN=CTSD PE=1 SV=1
236	256	tr|A0A1B0GV23|A0A1B0GV23_HUMAN	176.83	20	20	37700000	7	7	9	Carbamidomethylation; Deamidation N	43831	Cathepsin D OS=Homo sapiens OX=9606 GN=CTSD PE=1 SV=1
236	257	tr|A0A1B0GVD5|A0A1B0GVD5_HUMAN	176.83	20	20	37700000	7	7	9	Carbamidomethylation; Deamidation N	44238	Cathepsin D OS=Homo sapiens OX=9606 GN=CTSD PE=1 SV=1
236	258	tr|A0A1B0GWE8|A0A1B0GWE8_HUMAN	176.83	20	20	37700000	7	7	9	Carbamidomethylation; Deamidation N	44353	Cathepsin D OS=Homo sapiens OX=9606 GN=CTSD PE=1 SV=1
236	259	P07339|CATD_HUMAN	176.83	19	19	37700000	7	7	9	Carbamidomethylation; Deamidation N	44552	Cathepsin D OS=Homo sapiens OX=9606 GN=CTSD PE=1 SV=1
172	268	Q06830|PRDX1_HUMAN	173.86	49	49	37900000	8	7	12	Carbamidomethylation; Deamidation N	22110	Peroxiredoxin-1 OS=Homo sapiens OX=9606 GN=PRDX1 PE=1 SV=1
266	477	Q9GZP4|PITH1_HUMAN	169.06	45	45	16000000	7	7	8	Carbamidomethylation; Deamidation N	24178	PITH domain-containing protein 1 OS=Homo sapiens OX=9606 GN=PITHD1 PE=1 SV=1
264	269	P48735|IDHP_HUMAN	162.64	18	18	16300000	7	7	8	Carbamidomethylation	50909	Isocitrate dehydrogenase [NADP] mitochondrial OS=Homo sapiens OX=9606 GN=IDH2 PE=1 SV=2
187	359	P09543|CN37_HUMAN	160.24	16	16	21100000	7	7	8		47579	2' 3'-cyclic-nucleotide 3'-phosphodiesterase OS=Homo sapiens OX=9606 GN=CNP PE=1 SV=2
175	302	P10909|CLUS_HUMAN	157.02	18	18	23800000	7	7	9	Carbamidomethylation; Deamidation N	52495	Clusterin OS=Homo sapiens OX=9606 GN=CLU PE=1 SV=1
265	475	P30153|2AAA_HUMAN	156.57	15	15	12600000	7	7	8	Carbamidomethylation; Deamidation N	65309	Serine/threonine-protein phosphatase 2A 65 kDa regulatory subunit A alpha isoform OS=Homo sapiens OX=9606 GN=PPP2R1A PE=1 SV=4
155	483	P05090|APOD_HUMAN	153.36	35	35	39200000	7	7	14	Carbamidomethylation; Deamidation N	21276	Apolipoprotein D OS=Homo sapiens OX=9606 GN=APOD PE=1 SV=1
155	484	tr|C9JF17|C9JF17_HUMAN	153.36	31	31	39200000	7	7	14	Carbamidomethylation; Deamidation N	24158	Apolipoprotein D (Fragment) OS=Homo sapiens OX=9606 GN=APOD PE=1 SV=1
218	382	P05091|ALDH2_HUMAN	150.8	15	15	17800000	7	7	9	Carbamidomethylation; Deamidation N	56381	Aldehyde dehydrogenase mitochondrial OS=Homo sapiens OX=9606 GN=ALDH2 PE=1 SV=2
246	501	P10606|COX5B_HUMAN	150.79	44	44	48200000	7	7	9		13696	Cytochrome c oxidase subunit 5B mitochondrial OS=Homo sapiens OX=9606 GN=COX5B PE=1 SV=2
267	274	O43301|HS12A_HUMAN	149.88	12	12	13100000	7	7	8		74978	Heat shock 70 kDa protein 12A OS=Homo sapiens OX=9606 GN=HSPA12A PE=1 SV=2
267	275	tr|A0A1B0GTF3|A0A1B0GTF3_HUMAN	149.88	12	12	13100000	7	7	8		77019	Heat shock 70 kDa protein 12A OS=Homo sapiens OX=9606 GN=HSPA12A PE=1 SV=1
205	907	P16949|STMN1_HUMAN	149.28	40	40	57200000	7	7	11	Deamidation N; Phosphoserine (pS)	17302	Stathmin OS=Homo sapiens OX=9606 GN=STMN1 PE=1 SV=3
245	749	P30048|PRDX3_HUMAN	143.6	32	32	694000000	7	7	8	Deamidation N; HexNac; HexNacHex	27693	Thioredoxin-dependent peroxide reductase mitochondrial OS=Homo sapiens OX=9606 GN=PRDX3 PE=1 SV=3
269	383	tr|H3BTN5|H3BTN5_HUMAN	138.75	16	16	10200000	7	7	8	Carbamidomethylation; Deamidation N	53045	Pyruvate kinase (Fragment) OS=Homo sapiens OX=9606 GN=PKM PE=1 SV=1
189	386	P51970|NDUA8_HUMAN	137.59	32	32	38400000	7	7	11	Carbamidomethylation; Deamidation N	20105	NADH dehydrogenase [ubiquinone] 1 alpha subcomplex subunit 8 OS=Homo sapiens OX=9606 GN=NDUFA8 PE=1 SV=3
76	64	P08238|HS90B_HUMAN	258.18	27	27	19100000	19	6	29	Deamidation N; HLys; Phosphoserine (pS)	83264	Heat shock protein HSP 90-beta OS=Homo sapiens OX=9606 GN=HSP90AB1 PE=1 SV=4
77	150	P01857|IGHG1_HUMAN	253.61	45	45	238000000	12	6	28	Carbamidomethylation; Deamidation N; HexNac	36106	Immunoglobulin heavy constant gamma 1 OS=Homo sapiens OX=9606 GN=IGHG1 PE=1 SV=1
77	152	tr|A0A0A0MS08|A0A0A0MS08_HUMAN	253.61	38	38	238000000	12	6	28	Carbamidomethylation; Deamidation N; HexNac	43912	Immunoglobulin heavy constant gamma 1 (Fragment) OS=Homo sapiens OX=9606 GN=IGHG1 PE=1 SV=1
43	185	P31946|1433B_HUMAN	223.02	50	50	77000000	16	6	40	Oxidation (M); Deamidation N	28082	14-3-3 protein beta/alpha OS=Homo sapiens OX=9606 GN=YWHAB PE=1 SV=3
198	327	tr|A0A0A0MTJ8|A0A0A0MTJ8_HUMAN	216.93	29	29	33600000	8	6	11	Carbamidomethylation; Deamidation N; HexNac	45540	Cell adhesion molecule 1 (Fragment) OS=Homo sapiens OX=9606 GN=CADM1 PE=1 SV=1
219	462	Q14982|OPCM_HUMAN	212.64	25	25	46400000	7	6	10	Carbamidomethylation; Deamidation N	38008	Opioid-binding protein/cell adhesion molecule OS=Homo sapiens OX=9606 GN=OPCML PE=1 SV=1
67	189	P61981|1433G_HUMAN	206.43	49	49	55000000	13	6	31	Carbamidomethylation; Deamidation N	28303	14-3-3 protein gamma OS=Homo sapiens OX=9606 GN=YWHAG PE=1 SV=2
53	143	P63104|1433Z_HUMAN	205.97	41	41	247000000	11	6	38	Carbamidomethylation; Oxidation (M); Deamidation N	27745	14-3-3 protein zeta/delta OS=Homo sapiens OX=9606 GN=YWHAZ PE=1 SV=1
53	144	tr|E7EX29|E7EX29_HUMAN	205.97	41	41	247000000	11	6	38	Carbamidomethylation; Oxidation (M); Deamidation N	28037	14-3-3 protein zeta/delta (Fragment) OS=Homo sapiens OX=9606 GN=YWHAZ PE=1 SV=1
97	129	Q04917|1433F_HUMAN	193.49	45	45	20800000	11	6	22	Carbamidomethylation; Deamidation N	28219	14-3-3 protein eta OS=Homo sapiens OX=9606 GN=YWHAH PE=1 SV=4
208	818	tr|A0A087X0U3|A0A087X0U3_HUMAN	191.44	17	17	48500000	6	6	11	Deamidation N	47100	Amino acid transporter OS=Homo sapiens OX=9606 GN=SLC1A3 PE=1 SV=1
208	819	tr|A0A087WT87|A0A087WT87_HUMAN	191.44	14	14	48500000	6	6	11	Deamidation N	54208	Amino acid transporter OS=Homo sapiens OX=9606 GN=SLC1A3 PE=1 SV=1
208	820	P43003|EAA1_HUMAN	191.44	13	13	48500000	6	6	11	Deamidation N	59572	Excitatory amino acid transporter 1 OS=Homo sapiens OX=9606 GN=SLC1A3 PE=1 SV=1
273	405	P00558|PGK1_HUMAN	186.5	19	19	13500000	6	6	6	Carbamidomethylation; Deamidation N	44615	Phosphoglycerate kinase 1 OS=Homo sapiens OX=9606 GN=PGK1 PE=1 SV=3
222	724	P55290|CAD13_HUMAN	180.65	16	16	26400000	6	6	10	Oxidation (M); Deamidation N; Ubiquitination-K	78287	Cadherin-13 OS=Homo sapiens OX=9606 GN=CDH13 PE=1 SV=1
274	337	P09382|LEG1_HUMAN	180.18	51	51	37400000	6	6	8	Carbamidomethylation; Deamidation N	14716	Galectin-1 OS=Homo sapiens OX=9606 GN=LGALS1 PE=1 SV=2
322	493	P02792|FRIL_HUMAN	177.58	31	31	52500000	6	6	7		20020	Ferritin light chain OS=Homo sapiens OX=9606 GN=FTL PE=1 SV=2
271	306	Q969P0|IGSF8_HUMAN	177.12	13	13	20500000	6	6	7	Carbamidomethylation	65034	Immunoglobulin superfamily member 8 OS=Homo sapiens OX=9606 GN=IGSF8 PE=1 SV=1
168	942	P62328|TYB4_HUMAN	172.48	57	57	92600000	6	6	13	Deamidation N	5053	Thymosin beta-4 OS=Homo sapiens OX=9606 GN=TMSB4X PE=1 SV=2
275	469	Q99962|SH3G2_HUMAN	171.88	23	23	18100000	6	6	6	Carbamidomethylation; Deamidation N	39962	Endophilin-A1 OS=Homo sapiens OX=9606 GN=SH3GL2 PE=1 SV=1
239	342	P28838|AMPL_HUMAN	171.69	14	14	11500000	6	6	7		56166	Cytosol aminopeptidase OS=Homo sapiens OX=9606 GN=LAP3 PE=1 SV=3
223	410	tr|I3L1P8|I3L1P8_HUMAN	169.37	24	24	519000000	6	6	9	HLys	32182	Mitochondrial 2-oxoglutarate/malate carrier protein (Fragment) OS=Homo sapiens OX=9606 GN=SLC25A11 PE=1 SV=1
223	411	Q02978|M2OM_HUMAN	169.37	23	23	519000000	6	6	9	HLys	34062	Mitochondrial 2-oxoglutarate/malate carrier protein OS=Homo sapiens OX=9606 GN=SLC25A11 PE=1 SV=3
201	297	Q9UNZ2|NSF1C_HUMAN	167.05	22	22	5930000	6	6	8	Deamidation N	40573	NSFL1 cofactor p47 OS=Homo sapiens OX=9606 GN=NSFL1C PE=1 SV=2
144	243	P11177|ODPB_HUMAN	164.96	23	23	13900000	7	6	7		39233	Pyruvate dehydrogenase E1 component subunit beta mitochondrial OS=Homo sapiens OX=9606 GN=PDHB PE=1 SV=3
247	570	O75368|SH3L1_HUMAN	164.59	61	61	14600000	6	6	8	Deamidation N	12774	SH3 domain-binding glutamic acid-rich-like protein OS=Homo sapiens OX=9606 GN=SH3BGRL PE=1 SV=1
204	443	P62805|H4_HUMAN	164.23	51	51	137000000	6	6	11		11367	Histone H4 OS=Homo sapiens OX=9606 GN=HIST1H4A PE=1 SV=2
226	491	tr|S4R371|S4R371_HUMAN	160.61	39	39	36700000	6	6	10	Carbamidomethylation	14787	Fatty acid-binding protein heart (Fragment) OS=Homo sapiens OX=9606 GN=FABP3 PE=1 SV=1
226	492	P05413|FABPH_HUMAN	160.61	39	39	36700000	6	6	10	Carbamidomethylation	14858	Fatty acid-binding protein heart OS=Homo sapiens OX=9606 GN=FABP3 PE=1 SV=4
158	446	P10599|THIO_HUMAN	158.89	51	51	120000000	6	6	15	Carbamidomethylation	11737	Thioredoxin OS=Homo sapiens OX=9606 GN=TXN PE=1 SV=3
203	427	P13073|COX41_HUMAN	156.39	33	33	77200000	6	6	10		19577	Cytochrome c oxidase subunit 4 isoform 1 mitochondrial OS=Homo sapiens OX=9606 GN=COX4I1 PE=1 SV=1
244	450	P61604|CH10_HUMAN	156	54	54	60500000	6	6	9		10932	10 kDa heat shock protein mitochondrial OS=Homo sapiens OX=9606 GN=HSPE1 PE=1 SV=2
241	886	P19022|CADH2_HUMAN	154.35	12	12	10800000	6	6	9	Deamidation N	99809	Cadherin-2 OS=Homo sapiens OX=9606 GN=CDH2 PE=1 SV=4
320	457	P24539|AT5F1_HUMAN	151.46	23	23	12900000	6	6	7		28909	ATP synthase F(0) complex subunit B1 mitochondrial OS=Homo sapiens OX=9606 GN=ATP5F1 PE=1 SV=2
359	996	P38606|VATA_HUMAN	144.58	13	13	9610000	6	6	6	Deamidation N	68304	V-type proton ATPase catalytic subunit A OS=Homo sapiens OX=9606 GN=ATP6V1A PE=1 SV=2
237	277	P07237|PDIA1_HUMAN	141.3	13	13	16800000	8	6	9		57116	Protein disulfide-isomerase OS=Homo sapiens OX=9606 GN=P4HB PE=1 SV=3
362	472	P02649|APOE_HUMAN	140.71	22	22	5550000	6	6	6	Deamidation N	36154	Apolipoprotein E OS=Homo sapiens OX=9606 GN=APOE PE=1 SV=1
317	360	tr|C9J0K6|C9J0K6_HUMAN	139.91	36	36	21600000	6	6	7	Carbamidomethylation	17605	Sorcin OS=Homo sapiens OX=9606 GN=SRI PE=1 SV=1
317	361	P30626|SORCN_HUMAN	139.91	28	28	21600000	6	6	7	Carbamidomethylation	21676	Sorcin OS=Homo sapiens OX=9606 GN=SRI PE=1 SV=1
316	356	tr|F5GZS6|F5GZS6_HUMAN	139.41	12	12	7330000	6	6	7	Carbamidomethylation	64873	4F2 cell-surface antigen heavy chain OS=Homo sapiens OX=9606 GN=SLC3A2 PE=1 SV=1
316	357	P08195|4F2_HUMAN	139.41	11	11	7330000	6	6	7	Carbamidomethylation	67994	4F2 cell-surface antigen heavy chain OS=Homo sapiens OX=9606 GN=SLC3A2 PE=1 SV=3
316	358	tr|J3KPF3|J3KPF3_HUMAN	139.41	11	11	7330000	6	6	7	Carbamidomethylation	68101	4F2 cell-surface antigen heavy chain OS=Homo sapiens OX=9606 GN=SLC3A2 PE=1 SV=1
284	721	Q99584|S10AD_HUMAN	137.16	55	55	44600000	6	6	8	Deamidation N	11471	Protein S100-A13 OS=Homo sapiens OX=9606 GN=S100A13 PE=1 SV=1
358	919	P00915|CAH1_HUMAN	132.62	36	36	10100000	6	6	6	Deamidation N	28870	Carbonic anhydrase 1 OS=Homo sapiens OX=9606 GN=CA1 PE=1 SV=2
333	1003	tr|G3V1A4|G3V1A4_HUMAN	130.46	44	44	14800000	6	6	6	Carbamidomethylation; Deamidation N	16812	Cofilin 1 (Non-muscle) isoform CRA_a OS=Homo sapiens OX=9606 GN=CFL1 PE=1 SV=1
333	1004	tr|E9PP50|E9PP50_HUMAN	130.46	41	41	14800000	6	6	6	Carbamidomethylation; Deamidation N	17778	Cofilin-1 (Fragment) OS=Homo sapiens OX=9606 GN=CFL1 PE=1 SV=8
333	1005	P23528|COF1_HUMAN	130.46	39	39	14800000	6	6	6	Carbamidomethylation; Deamidation N	18502	Cofilin-1 OS=Homo sapiens OX=9606 GN=CFL1 PE=1 SV=3
333	1006	tr|E9PK25|E9PK25_HUMAN	130.46	32	32	14800000	6	6	6	Carbamidomethylation; Deamidation N	22728	Cofilin-1 OS=Homo sapiens OX=9606 GN=CFL1 PE=1 SV=1
361	518	Q07960|RHG01_HUMAN	127.51	16	16	6590000	6	6	6	Carbamidomethylation; Deamidation N	50436	Rho GTPase-activating protein 1 OS=Homo sapiens OX=9606 GN=ARHGAP1 PE=1 SV=1
80	57	P50993|AT1A2_HUMAN	241.78	21	21	10500000	18	5	25	Carbamidomethylation; Deamidation N	112265	Sodium/potassium-transporting ATPase subunit alpha-2 OS=Homo sapiens OX=9606 GN=ATP1A2 PE=1 SV=1
95	101	tr|A0A0G2JPD5|A0A0G2JPD5_HUMAN	236.55	22	22	16500000	16	5	22	Phosphoserine (pS)	78902	Microtubule-associated protein OS=Homo sapiens OX=9606 GN=MAPT PE=1 SV=1
95	100	tr|A0A0G2JQJ7|A0A0G2JQJ7_HUMAN	236.55	22	22	16500000	16	5	22	Phosphoserine (pS)	78955	Microtubule-associated protein OS=Homo sapiens OX=9606 GN=MAPT PE=1 SV=1
95	99	P10636|TAU_HUMAN	236.55	22	22	16500000	16	5	22	Phosphoserine (pS)	78928	Microtubule-associated protein tau OS=Homo sapiens OX=9606 GN=MAPT PE=1 SV=5
102	567	P01834|IGKC_HUMAN	199.13	64	64	108000000	5	5	21	Carbamidomethylation; Deamidation N	11765	Immunoglobulin kappa constant OS=Homo sapiens OX=9606 GN=IGKC PE=1 SV=2
161	184	P35908|K22E_HUMAN	184.37	16	16	7430000	10	5	14		65433	Keratin type II cytoskeletal 2 epidermal OS=Homo sapiens OX=9606 GN=KRT2 PE=1 SV=2
81	131	P27348|1433T_HUMAN	182.03	47	47	8210000	11	5	26	Carbamidomethylation; Oxidation (M); Deamidation N	27764	14-3-3 protein theta OS=Homo sapiens OX=9606 GN=YWHAQ PE=1 SV=1
365	569	tr|A0A087X2B5|A0A087X2B5_HUMAN	173.34	33	33	19300000	5	5	6	Carbamidomethylation; Deamidation N	23896	Basigin (Fragment) OS=Homo sapiens OX=9606 GN=BSG PE=1 SV=1
365	574	P35613|BASI_HUMAN	173.34	19	19	19300000	5	5	6	Carbamidomethylation; Deamidation N	42200	Basigin OS=Homo sapiens OX=9606 GN=BSG PE=1 SV=2
243	595	O15540|FABP7_HUMAN	172.83	55	55	63900000	5	5	9	Deamidation N	14889	Fatty acid-binding protein brain OS=Homo sapiens OX=9606 GN=FABP7 PE=1 SV=3
179	586	P07108|ACBP_HUMAN	168.46	64	64	169000000	5	5	11	Oxidation (M); Deamidation N	10044	Acyl-CoA-binding protein OS=Homo sapiens OX=9606 GN=DBI PE=1 SV=2
179	587	tr|B8ZWD1|B8ZWD1_HUMAN	168.46	58	58	169000000	5	5	11	Oxidation (M); Deamidation N	11150	Acyl-CoA-binding protein OS=Homo sapiens OX=9606 GN=DBI PE=1 SV=1
179	593	tr|A0A0A0MTI5|A0A0A0MTI5_HUMAN	168.46	39	39	169000000	5	5	11	Oxidation (M); Deamidation N	15959	Acyl-CoA-binding protein OS=Homo sapiens OX=9606 GN=DBI PE=1 SV=1
285	825	Q15121|PEA15_HUMAN	163.53	53	53	29200000	5	5	7	Carbamidomethylation; Deamidation N	15040	Astrocytic phosphoprotein PEA-15 OS=Homo sapiens OX=9606 GN=PEA15 PE=1 SV=2
136	609	O14561|ACPM_HUMAN	162.72	30	30	171000000	5	5	17	Carbamidomethylation; Deamidation N	17417	Acyl carrier protein mitochondrial OS=Homo sapiens OX=9606 GN=NDUFAB1 PE=1 SV=3
364	562	P48047|ATPO_HUMAN	162.06	31	31	27000000	5	5	5	Deamidation N	23277	ATP synthase subunit O mitochondrial OS=Homo sapiens OX=9606 GN=ATP5O PE=1 SV=1
221	543	Q16799|RTN1_HUMAN	160.19	12	12	24800000	6	5	8	Deamidation N	83618	Reticulon-1 OS=Homo sapiens OX=9606 GN=RTN1 PE=1 SV=1
209	615	P51674|GPM6A_HUMAN	159.87	16	16	91500000	6	5	11	Carbamidomethylation	31210	Neuronal membrane glycoprotein M6-a OS=Homo sapiens OX=9606 GN=GPM6A PE=1 SV=2
249	800	tr|E9PR17|E9PR17_HUMAN	158.91	35	35	61900000	5	5	8	Carbamidomethylation; Deamidation N	14529	CD59 glycoprotein OS=Homo sapiens OX=9606 GN=CD59 PE=1 SV=1
366	425	P30041|PRDX6_HUMAN	156.44	30	30	16700000	5	5	6	Carbamidomethylation	25035	Peroxiredoxin-6 OS=Homo sapiens OX=9606 GN=PRDX6 PE=1 SV=3
157	445	P60201|MYPR_HUMAN	155.78	20	20	206000000	5	5	15	Carbamidomethylation; Deamidation N	30077	Myelin proteolipid protein OS=Homo sapiens OX=9606 GN=PLP1 PE=1 SV=2
135	598	tr|J3QS39|J3QS39_HUMAN	155.63	51	51	244000000	5	5	16		10469	Polyubiquitin-B (Fragment) OS=Homo sapiens OX=9606 GN=UBB PE=1 SV=1
135	600	tr|J3QTR3|J3QTR3_HUMAN	155.63	44	44	244000000	5	5	16		12237	Ubiquitin-40S ribosomal protein S27a (Fragment) OS=Homo sapiens OX=9606 GN=RPS27A PE=1 SV=1
135	603	tr|F5H6Q2|F5H6Q2_HUMAN	155.63	39	39	244000000	5	5	16		13732	Polyubiquitin-C (Fragment) OS=Homo sapiens OX=9606 GN=UBC PE=1 SV=8
135	605	P62987|RL40_HUMAN	155.63	37	37	244000000	5	5	16		14728	Ubiquitin-60S ribosomal protein L40 OS=Homo sapiens OX=9606 GN=UBA52 PE=1 SV=2
135	606	tr|F5GYU3|F5GYU3_HUMAN	155.63	35	35	244000000	5	5	16		15032	Polyubiquitin-C (Fragment) OS=Homo sapiens OX=9606 GN=UBC PE=1 SV=1
135	607	tr|F5H2Z3|F5H2Z3_HUMAN	155.63	35	35	244000000	5	5	16		15310	Polyubiquitin-C (Fragment) OS=Homo sapiens OX=9606 GN=UBC PE=1 SV=1
135	610	tr|F5H265|F5H265_HUMAN	155.63	32	32	244000000	5	5	16		16841	Polyubiquitin-C (Fragment) OS=Homo sapiens OX=9606 GN=UBC PE=1 SV=1
135	611	tr|B4DV12|B4DV12_HUMAN	155.63	31	31	244000000	5	5	16		17215	Polyubiquitin-B OS=Homo sapiens OX=9606 GN=UBB PE=1 SV=1
135	612	tr|F5H388|F5H388_HUMAN	155.63	30	30	244000000	5	5	16		17484	Polyubiquitin-C (Fragment) OS=Homo sapiens OX=9606 GN=UBC PE=1 SV=1
135	613	P62979|RS27A_HUMAN	155.63	30	30	244000000	5	5	16		17965	Ubiquitin-40S ribosomal protein S27a OS=Homo sapiens OX=9606 GN=RPS27A PE=1 SV=2
135	614	tr|F5H747|F5H747_HUMAN	155.63	29	29	244000000	5	5	16		18073	Polyubiquitin-C (Fragment) OS=Homo sapiens OX=9606 GN=UBC PE=1 SV=8
135	616	tr|F5GXK7|F5GXK7_HUMAN	155.63	28	28	244000000	5	5	16		19016	Polyubiquitin-C (Fragment) OS=Homo sapiens OX=9606 GN=UBC PE=1 SV=2
135	623	tr|J3QKN0|J3QKN0_HUMAN	155.63	23	23	244000000	5	5	16		23163	Polyubiquitin-B (Fragment) OS=Homo sapiens OX=9606 GN=UBB PE=1 SV=1
135	625	tr|Q5PY61|Q5PY61_HUMAN	155.63	21	21	244000000	5	5	16		25758	Polyubiquitin-C OS=Homo sapiens OX=9606 GN=UBC PE=1 SV=1
135	624	P0CG47|UBB_HUMAN	155.63	21	21	244000000	5	5	16		25762	Polyubiquitin-B OS=Homo sapiens OX=9606 GN=UBB PE=1 SV=1
135	628	tr|Q96C32|Q96C32_HUMAN	155.63	15	15	244000000	5	5	16		34304	Polyubiquitin-C OS=Homo sapiens OX=9606 GN=UBC PE=1 SV=1
299	851	Q9H3Z4|DNJC5_HUMAN	155.26	25	25	36400000	5	5	8	Deamidation N; Phosphoserine (pS)	22149	DnaJ homolog subfamily C member 5 OS=Homo sapiens OX=9606 GN=DNAJC5 PE=1 SV=1
277	394	P38646|GRP75_HUMAN	153.92	9	9	12900000	5	5	5		73681	Stress-70 protein mitochondrial OS=Homo sapiens OX=9606 GN=HSPA9 PE=1 SV=2
367	437	tr|F5GY37|F5GY37_HUMAN	153.35	22	22	30700000	5	5	6	Deamidation N	29723	Prohibitin-2 OS=Homo sapiens OX=9606 GN=PHB2 PE=1 SV=1
367	440	tr|J3KPX7|J3KPX7_HUMAN	153.35	20	20	30700000	5	5	6	Deamidation N	33239	Prohibitin-2 OS=Homo sapiens OX=9606 GN=PHB2 PE=1 SV=2
367	441	Q99623|PHB2_HUMAN	153.35	20	20	30700000	5	5	6	Deamidation N	33296	Prohibitin-2 OS=Homo sapiens OX=9606 GN=PHB2 PE=1 SV=2
248	762	tr|C9JTE0|C9JTE0_HUMAN	151.7	23	23	27100000	5	5	7	Carbamidomethylation; Deamidation N	23869	Myelin-oligodendrocyte glycoprotein OS=Homo sapiens OX=9606 GN=MOG PE=1 SV=1
248	763	Q16653|MOG_HUMAN	151.7	20	20	27100000	5	5	7	Carbamidomethylation; Deamidation N	28193	Myelin-oligodendrocyte glycoprotein OS=Homo sapiens OX=9606 GN=MOG PE=1 SV=2
281	478	P04075|ALDOA_HUMAN	147.62	16	16	29700000	6	5	7	Carbamidomethylation	39420	Fructose-bisphosphate aldolase A OS=Homo sapiens OX=9606 GN=ALDOA PE=1 SV=2
281	479	tr|J3KPS3|J3KPS3_HUMAN	147.62	15	15	29700000	6	5	7	Carbamidomethylation	39818	Fructose-bisphosphate aldolase OS=Homo sapiens OX=9606 GN=ALDOA PE=1 SV=1
321	471	Q12765|SCRN1_HUMAN	146.54	12	12	16800000	5	5	7	Carbamidomethylation	46382	Secernin-1 OS=Homo sapiens OX=9606 GN=SCRN1 PE=1 SV=2
242	541	tr|A0A024R6I7|A0A024R6I7_HUMAN	145.49	14	14	16600000	5	5	7	Deamidation N	46709	Alpha-1-antitrypsin OS=Homo sapiens OX=9606 GN=SERPINA1 PE=1 SV=1
242	540	P01009|A1AT_HUMAN	145.49	14	14	16600000	5	5	7	Deamidation N	46737	Alpha-1-antitrypsin OS=Homo sapiens OX=9606 GN=SERPINA1 PE=1 SV=3
326	1059	P06748|NPM_HUMAN	145.47	25	25	12200000	6	5	7	Deamidation N; HydroxylProline; HexNac	32575	Nucleophosmin OS=Homo sapiens OX=9606 GN=NPM1 PE=1 SV=2
421	715	tr|A0A0C4DFV9|A0A0C4DFV9_HUMAN	145.09	21	21	10400000	5	5	5	Deamidation N	31124	Protein SET OS=Homo sapiens OX=9606 GN=SET PE=1 SV=1
421	716	Q01105|SET_HUMAN	145.09	19	19	10400000	5	5	5	Deamidation N	33489	Protein SET OS=Homo sapiens OX=9606 GN=SET PE=1 SV=3
196	230	P34932|HSP74_HUMAN	144.31	10	10	45100000	8	5	8	Carbamidomethylation	94331	Heat shock 70 kDa protein 4 OS=Homo sapiens OX=9606 GN=HSPA4 PE=1 SV=4
228	968	P63208|SKP1_HUMAN	144.14	38	38	37300000	5	5	7	Deamidation N	18658	S-phase kinase-associated protein 1 OS=Homo sapiens OX=9606 GN=SKP1 PE=1 SV=2
228	967	tr|E5RJR5|E5RJR5_HUMAN	144.14	38	38	37300000	5	5	7	Deamidation N	18720	S-phase kinase-associated protein 1 OS=Homo sapiens OX=9606 GN=SKP1 PE=1 SV=1
211	1296	P18669|PGAM1_HUMAN	143.07	21	21	29200000	5	5	10	Deamidation N; HexNac	28804	Phosphoglycerate mutase 1 OS=Homo sapiens OX=9606 GN=PGAM1 PE=1 SV=2
418	449	O94925|GLSK_HUMAN	141.75	9	9	6780000	5	5	5	Carbamidomethylation	73461	Glutaminase kidney isoform mitochondrial OS=Homo sapiens OX=9606 GN=GLS PE=1 SV=1
420	486	tr|H0Y6E7|H0Y6E7_HUMAN	141.7	19	19	10700000	5	5	5		31865	RNA-binding motif protein X chromosome (Fragment) OS=Homo sapiens OX=9606 GN=RBMX PE=1 SV=2
420	487	tr|H3BT71|H3BT71_HUMAN	141.7	19	19	10700000	5	5	5		32197	RNA-binding motif protein X chromosome OS=Homo sapiens OX=9606 GN=RBMX PE=1 SV=1
420	488	P38159|RBMX_HUMAN	141.7	14	14	10700000	5	5	5		42332	RNA-binding motif protein X chromosome OS=Homo sapiens OX=9606 GN=RBMX PE=1 SV=3
323	533	P05067|A4_HUMAN	136.64	9	9	8570000	5	5	5	Carbamidomethylation; Deamidation N	86943	Amyloid-beta A4 protein OS=Homo sapiens OX=9606 GN=APP PE=1 SV=3
220	503	O75781|PALM_HUMAN	135.61	17	17	20900000	7	5	9	Deamidation N	42076	Paralemmin-1 OS=Homo sapiens OX=9606 GN=PALM PE=1 SV=2
206	777	O00499|BIN1_HUMAN	135.61	9	9	38200000	5	5	9	Deamidation N	64699	Myc box-dependent-interacting protein 1 OS=Homo sapiens OX=9606 GN=BIN1 PE=1 SV=1
282	688	O94811|TPPP_HUMAN	133.71	26	26	36300000	5	5	8	Carbamidomethylation; Deamidation N; Phosphoserine (pS)	23694	Tubulin polymerization-promoting protein OS=Homo sapiens OX=9606 GN=TPPP PE=1 SV=1
225	535	P31930|QCR1_HUMAN	129.21	15	15	11700000	5	5	6	Carbamidomethylation; Deamidation N	52646	Cytochrome b-c1 complex subunit 1 mitochondrial OS=Homo sapiens OX=9606 GN=UQCRC1 PE=1 SV=3
424	742	Q9H2X9|S12A5_HUMAN	126.22	5	5	3350000	5	5	5	Carbamidomethylation; Deamidation N	126183	Solute carrier family 12 member 5 OS=Homo sapiens OX=9606 GN=SLC12A5 PE=1 SV=3
177	527	tr|Q3BDU5|Q3BDU5_HUMAN	124.29	11	11	7290000	5	5	5	Deamidation N	55638	Prelamin-A/C OS=Homo sapiens OX=9606 GN=LMNA PE=1 SV=1
177	528	tr|Q5TCI8|Q5TCI8_HUMAN	124.29	11	11	7290000	5	5	5	Deamidation N	55762	Prelamin-A/C OS=Homo sapiens OX=9606 GN=LMNA PE=1 SV=1
177	529	P02545|LMNA_HUMAN	124.29	8	8	7290000	5	5	5	Deamidation N	74140	Prelamin-A/C OS=Homo sapiens OX=9606 GN=LMNA PE=1 SV=1
363	770	Q14515|SPRL1_HUMAN	123.01	13	13	10100000	5	5	5	Deamidation N	75208	SPARC-like protein 1 OS=Homo sapiens OX=9606 GN=SPARCL1 PE=1 SV=2
370	695	P50502|F10A1_HUMAN	122.64	14	14	11300000	5	5	5	Deamidation N	41332	Hsc70-interacting protein OS=Homo sapiens OX=9606 GN=ST13 PE=1 SV=2
178	489	P09497|CLCB_HUMAN	120.62	20	20	50000000	5	5	10	Carbamidomethylation	25190	Clathrin light chain B OS=Homo sapiens OX=9606 GN=CLTB PE=1 SV=1
330	549	tr|D6RBL5|D6RBL5_HUMAN	117.32	17	17	20300000	5	5	5		29337	Annexin OS=Homo sapiens OX=9606 GN=ANXA5 PE=1 SV=1
330	550	P08758|ANXA5_HUMAN	117.32	13	13	20300000	5	5	5		35937	Annexin A5 OS=Homo sapiens OX=9606 GN=ANXA5 PE=1 SV=2
368	495	O60313|OPA1_HUMAN	114.2	6	6	3500000	5	5	5		111630	Dynamin-like 120 kDa protein mitochondrial OS=Homo sapiens OX=9606 GN=OPA1 PE=1 SV=3
368	496	tr|E5KLJ9|E5KLJ9_HUMAN	114.2	6	6	3500000	5	5	5		113681	Dynamin-like 120 kDa protein mitochondrial OS=Homo sapiens OX=9606 GN=OPA1 PE=1 SV=1
371	519	Q03252|LMNB2_HUMAN	110.43	7	7	6630000	5	5	5		69948	Lamin-B2 OS=Homo sapiens OX=9606 GN=LMNB2 PE=1 SV=4
286	734	P62807|H2B1C_HUMAN	105.15	41	41	98000000	5	5	7	Deamidation N	13906	Histone H2B type 1-C/E/F/G/I OS=Homo sapiens OX=9606 GN=HIST1H2BC PE=1 SV=4
286	732	Q99877|H2B1N_HUMAN	105.15	41	41	98000000	5	5	7	Deamidation N	13922	Histone H2B type 1-N OS=Homo sapiens OX=9606 GN=HIST1H2BN PE=1 SV=3
286	731	Q5QNW6|H2B2F_HUMAN	105.15	41	41	98000000	5	5	7	Deamidation N	13920	Histone H2B type 2-F OS=Homo sapiens OX=9606 GN=HIST2H2BF PE=1 SV=3
286	730	Q93079|H2B1H_HUMAN	105.15	41	41	98000000	5	5	7	Deamidation N	13892	Histone H2B type 1-H OS=Homo sapiens OX=9606 GN=HIST1H2BH PE=1 SV=3
286	729	P58876|H2B1D_HUMAN	105.15	41	41	98000000	5	5	7	Deamidation N	13936	Histone H2B type 1-D OS=Homo sapiens OX=9606 GN=HIST1H2BD PE=1 SV=2
286	728	Q99879|H2B1M_HUMAN	105.15	41	41	98000000	5	5	7	Deamidation N	13989	Histone H2B type 1-M OS=Homo sapiens OX=9606 GN=HIST1H2BM PE=1 SV=3
286	727	O60814|H2B1K_HUMAN	105.15	41	41	98000000	5	5	7	Deamidation N	13890	Histone H2B type 1-K OS=Homo sapiens OX=9606 GN=HIST1H2BK PE=1 SV=3
286	726	Q99880|H2B1L_HUMAN	105.15	41	41	98000000	5	5	7	Deamidation N	13952	Histone H2B type 1-L OS=Homo sapiens OX=9606 GN=HIST1H2BL PE=1 SV=3
286	735	tr|U3KQK0|U3KQK0_HUMAN	105.15	31	31	98000000	5	5	7	Deamidation N	18804	Histone H2B OS=Homo sapiens OX=9606 GN=HIST1H2BN PE=1 SV=1
423	514	O94826|TOM70_HUMAN	97.43	9	9	5930000	5	5	5		67455	Mitochondrial import receptor subunit TOM70 OS=Homo sapiens OX=9606 GN=TOMM70 PE=1 SV=1
40	84	P78324|SHPS1_HUMAN	276.96	41	41	21700000	17	4	39	Carbamidomethylation; Deamidation N	54967	Tyrosine-protein phosphatase non-receptor type substrate 1 OS=Homo sapiens OX=9606 GN=SIRPA PE=1 SV=2
278	536	tr|A0A087X2E3|A0A087X2E3_HUMAN	161.78	15	15	16800000	5	4	7	Deamidation N	52311	Synapsin-2 OS=Homo sapiens OX=9606 GN=SYN2 PE=1 SV=1
278	537	tr|A0A087WW96|A0A087WW96_HUMAN	161.78	13	13	16800000	5	4	7	Deamidation N	62996	Synapsin-2 OS=Homo sapiens OX=9606 GN=SYN2 PE=1 SV=1
291	1183	tr|G5EA42|G5EA42_HUMAN	159.62	20	20	5740000	4	4	8	Deamidation N	34492	Tropomodulin 2 (Neuronal) isoform CRA_a OS=Homo sapiens OX=9606 GN=TMOD2 PE=1 SV=1
291	1184	Q9NZR1|TMOD2_HUMAN	159.62	17	17	5740000	4	4	8	Deamidation N	39595	Tropomodulin-2 OS=Homo sapiens OX=9606 GN=TMOD2 PE=1 SV=1
398	1243	P07919|QCR6_HUMAN	148.74	30	30	53800000	4	4	6	Carbamidomethylation	10739	Cytochrome b-c1 complex subunit 6 mitochondrial OS=Homo sapiens OX=9606 GN=UQCRH PE=1 SV=2
492	584	P30101|PDIA3_HUMAN	147.43	13	13	6510000	4	4	4		56782	Protein disulfide-isomerase A3 OS=Homo sapiens OX=9606 GN=PDIA3 PE=1 SV=4
496	655	P78357|CNTP1_HUMAN	144.44	3	3	2790000	4	4	4	Carbamidomethylation	156266	Contactin-associated protein 1 OS=Homo sapiens OX=9606 GN=CNTNAP1 PE=1 SV=1
504	1205	tr|A0A286YF37|A0A286YF37_HUMAN	144.17	18	18	5700000	4	4	4	Carbamidomethylation; Deamidation N	30419	F-box only protein 2 (Fragment) OS=Homo sapiens OX=9606 GN=FBXO2 PE=1 SV=1
504	1207	Q9UK22|FBX2_HUMAN	144.17	16	16	5700000	4	4	4	Carbamidomethylation; Deamidation N	33328	F-box only protein 2 OS=Homo sapiens OX=9606 GN=FBXO2 PE=1 SV=2
425	837	P61019|RAB2A_HUMAN	140.31	25	25	10400000	4	4	4	Carbamidomethylation; Deamidation N	23546	Ras-related protein Rab-2A OS=Homo sapiens OX=9606 GN=RAB2A PE=1 SV=1
372	522	tr|B4DKF8|B4DKF8_HUMAN	139.92	14	14	5420000	4	4	4		42465	PH and SEC7 domain-containing protein 3 OS=Homo sapiens OX=9606 GN=PSD3 PE=1 SV=1
372	524	tr|E5RJ29|E5RJ29_HUMAN	139.92	5	5	5420000	4	4	4		108991	PH and SEC7 domain-containing protein 3 OS=Homo sapiens OX=9606 GN=PSD3 PE=1 SV=1
372	525	Q9NYI0|PSD3_HUMAN	139.92	5	5	5420000	4	4	4		116033	PH and SEC7 domain-containing protein 3 OS=Homo sapiens OX=9606 GN=PSD3 PE=1 SV=2
290	617	P30044|PRDX5_HUMAN	138.56	23	23	16900000	4	4	7	Carbamidomethylation	22086	Peroxiredoxin-5 mitochondrial OS=Homo sapiens OX=9606 GN=PRDX5 PE=1 SV=4
296	1685	tr|A0A1B0GTP1|A0A1B0GTP1_HUMAN	134.46	27	27	41100000	4	4	7	Carbamidomethylation; Deamidation N; Phosphoserine (pS)	29210	Proline-rich transmembrane protein 2 OS=Homo sapiens OX=9606 GN=PRRT2 PE=4 SV=1
296	1686	tr|A0A1B0GTE9|A0A1B0GTE9_HUMAN	134.46	26	26	41100000	4	4	7	Carbamidomethylation; Deamidation N; Phosphoserine (pS)	29281	Proline-rich transmembrane protein 2 OS=Homo sapiens OX=9606 GN=PRRT2 PE=4 SV=1
296	1687	Q7Z6L0|PRRT2_HUMAN	134.46	22	22	41100000	4	4	7	Carbamidomethylation; Deamidation N; Phosphoserine (pS)	34945	Proline-rich transmembrane protein 2 OS=Homo sapiens OX=9606 GN=PRRT2 PE=1 SV=1
296	1688	tr|A0A0G2JLL6|A0A0G2JLL6_HUMAN	134.46	21	21	41100000	4	4	7	Carbamidomethylation; Deamidation N; Phosphoserine (pS)	36833	Uncharacterized protein OS=Homo sapiens OX=9606 PE=4 SV=1
328	754	Q04760|LGUL_HUMAN	134.28	27	27	124000000	4	4	6	Carbamidomethylation; Deamidation N	20778	Lactoylglutathione lyase OS=Homo sapiens OX=9606 GN=GLO1 PE=1 SV=4
374	785	P16112|PGCA_HUMAN	133.82	2	2	14800000	4	4	5	Carbamidomethylation; Deamidation N	250190	Aggrecan core protein OS=Homo sapiens OX=9606 GN=ACAN PE=1 SV=2
374	786	tr|E7ENV9|E7ENV9_HUMAN	133.82	2	2	14800000	4	4	5	Carbamidomethylation; Deamidation N	250369	Aggrecan core protein OS=Homo sapiens OX=9606 GN=ACAN PE=1 SV=2
374	787	tr|A0A087X1T7|A0A087X1T7_HUMAN	133.82	2	2	14800000	4	4	5	Carbamidomethylation; Deamidation N	255585	Aggrecan core protein OS=Homo sapiens OX=9606 GN=ACAN PE=1 SV=1
374	788	tr|H0YM81|H0YM81_HUMAN	133.82	2	2	14800000	4	4	5	Carbamidomethylation; Deamidation N	257438	Aggrecan core protein OS=Homo sapiens OX=9606 GN=ACAN PE=1 SV=1
374	789	tr|E7EX88|E7EX88_HUMAN	133.82	2	2	14800000	4	4	5	Carbamidomethylation; Deamidation N	261325	Aggrecan core protein OS=Homo sapiens OX=9606 GN=ACAN PE=1 SV=2
435	697	Q15293|RCN1_HUMAN	131.98	14	14	6910000	4	4	5		38890	Reticulocalbin-1 OS=Homo sapiens OX=9606 GN=RCN1 PE=1 SV=1
319	395	P05937|CALB1_HUMAN	131.43	23	23	7940000	5	4	5		30025	Calbindin OS=Homo sapiens OX=9606 GN=CALB1 PE=1 SV=2
437	765	tr|H0YDD4|H0YDD4_HUMAN	130.95	13	13	9420000	4	4	4	Deamidation N	51201	Acetyltransferase component of pyruvate dehydrogenase complex (Fragment) OS=Homo sapiens OX=9606 GN=DLAT PE=1 SV=1
437	766	tr|E9PEJ4|E9PEJ4_HUMAN	130.95	11	11	9420000	4	4	4	Deamidation N	57587	Acetyltransferase component of pyruvate dehydrogenase complex OS=Homo sapiens OX=9606 GN=DLAT PE=1 SV=1
437	768	P10515|ODP2_HUMAN	130.95	10	10	9420000	4	4	4	Deamidation N	68997	Dihydrolipoyllysine-residue acetyltransferase component of pyruvate dehydrogenase complex mitochondrial OS=Homo sapiens OX=9606 GN=DLAT PE=1 SV=3
250	828	Q13740|CD166_HUMAN	130.79	13	13	5810000	4	4	4	Carbamidomethylation; Deamidation N	65102	CD166 antigen OS=Homo sapiens OX=9606 GN=ALCAM PE=1 SV=2
494	620	tr|J3QL14|J3QL14_HUMAN	130.6	19	19	15100000	4	4	4	Carbamidomethylation	26824	V-type proton ATPase subunit d 1 (Fragment) OS=Homo sapiens OX=9606 GN=ATP6V0D1 PE=1 SV=1
494	626	tr|R4GN72|R4GN72_HUMAN	130.6	16	16	15100000	4	4	4	Carbamidomethylation	31676	V-type proton ATPase subunit d 1 OS=Homo sapiens OX=9606 GN=ATP6V0D1 PE=1 SV=1
494	627	P61421|VA0D1_HUMAN	130.6	13	13	15100000	4	4	4	Carbamidomethylation	40329	V-type proton ATPase subunit d 1 OS=Homo sapiens OX=9606 GN=ATP6V0D1 PE=1 SV=1
494	629	tr|F5GYQ1|F5GYQ1_HUMAN	130.6	11	11	15100000	4	4	4	Carbamidomethylation	44660	V-type proton ATPase subunit OS=Homo sapiens OX=9606 GN=ATP6V0D1 PE=1 SV=1
373	530	P31948|STIP1_HUMAN	130.2	8	8	3800000	4	4	4	Carbamidomethylation	62639	Stress-induced-phosphoprotein 1 OS=Homo sapiens OX=9606 GN=STIP1 PE=1 SV=1
495	905	P61978|HNRPK_HUMAN	129.65	13	13	8700000	4	4	4	Deamidation N	50976	Heterogeneous nuclear ribonucleoprotein K OS=Homo sapiens OX=9606 GN=HNRNPK PE=1 SV=1
430	608	Q16795|NDUA9_HUMAN	129.37	14	14	9350000	4	4	4		42510	NADH dehydrogenase [ubiquinone] 1 alpha subcomplex subunit 9 mitochondrial OS=Homo sapiens OX=9606 GN=NDUFA9 PE=1 SV=2
431	934	P35612|ADDB_HUMAN	128.26	8	8	12400000	4	4	5	Deamidation N	80854	Beta-adducin OS=Homo sapiens OX=9606 GN=ADD2 PE=1 SV=3
427	566	O14773|TPP1_HUMAN	127.76	9	9	11300000	4	4	4		61248	Tripeptidyl-peptidase 1 OS=Homo sapiens OX=9606 GN=TPP1 PE=1 SV=2
254	1040	tr|G3V2N0|G3V2N0_HUMAN	126.82	39	39	29700000	4	4	7	Deamidation N; HydroxylProline; Ubiquitination-K	12387	Guanine nucleotide-binding protein subunit gamma OS=Homo sapiens OX=9606 GN=GNG2 PE=1 SV=1
272	308	P19367|HXK1_HUMAN	124.52	7	7	5950000	7	4	7		102486	Hexokinase-1 OS=Homo sapiens OX=9606 GN=HK1 PE=1 SV=3
493	761	P78352|DLG4_HUMAN	122.69	8	8	6790000	4	4	4	Deamidation N	80495	Disks large homolog 4 OS=Homo sapiens OX=9606 GN=DLG4 PE=1 SV=3
376	555	P22626|ROA2_HUMAN	122.55	15	15	7720000	4	4	5	Deamidation N	37430	Heterogeneous nuclear ribonucleoproteins A2/B1 OS=Homo sapiens OX=9606 GN=HNRNPA2B1 PE=1 SV=2
428	672	P35237|SPB6_HUMAN	121.06	15	15	9960000	4	4	4	Carbamidomethylation	42622	Serpin B6 OS=Homo sapiens OX=9606 GN=SERPINB6 PE=1 SV=3
428	673	tr|A0A024QZX5|A0A024QZX5_HUMAN	121.06	14	14	9960000	4	4	4	Carbamidomethylation	43024	Serpin B6 OS=Homo sapiens OX=9606 GN=SERPINB6 PE=1 SV=1
428	674	tr|A0A087X1N8|A0A087X1N8_HUMAN	121.06	14	14	9960000	4	4	4	Carbamidomethylation	44822	Serpin B6 OS=Homo sapiens OX=9606 GN=SERPINB6 PE=1 SV=1
433	658	Q15907|RB11B_HUMAN	120.37	19	19	6370000	4	4	5		24488	Ras-related protein Rab-11B OS=Homo sapiens OX=9606 GN=RAB11B PE=1 SV=4
287	531	Q9Y639|NPTN_HUMAN	119.74	12	12	50400000	4	4	7	Carbamidomethylation	44387	Neuroplastin OS=Homo sapiens OX=9606 GN=NPTN PE=1 SV=2
380	868	P37837|TALDO_HUMAN	119.5	12	12	11000000	4	4	5	Deamidation N	37540	Transaldolase OS=Homo sapiens OX=9606 GN=TALDO1 PE=1 SV=2
439	1050	O14745|NHRF1_HUMAN	118.1	12	12	4850000	4	4	5	Carbamidomethylation; Deamidation N	38868	Na(+)/H(+) exchange regulatory cofactor NHE-RF1 OS=Homo sapiens OX=9606 GN=SLC9A3R1 PE=1 SV=4
432	653	tr|A0A0A0MR02|A0A0A0MR02_HUMAN	117.68	16	16	18100000	4	4	5		30348	Voltage-dependent anion-selective channel protein 2 (Fragment) OS=Homo sapiens OX=9606 GN=VDAC2 PE=1 SV=1
432	654	P45880|VDAC2_HUMAN	117.68	15	15	18100000	4	4	5		31567	Voltage-dependent anion-selective channel protein 2 OS=Homo sapiens OX=9606 GN=VDAC2 PE=1 SV=2
383	685	tr|C9JZ20|C9JZ20_HUMAN	117.63	19	19	12900000	4	4	5		22271	Prohibitin (Fragment) OS=Homo sapiens OX=9606 GN=PHB PE=1 SV=1
383	686	tr|E7ESE2|E7ESE2_HUMAN	117.63	19	19	12900000	4	4	5		22399	Prohibitin (Fragment) OS=Homo sapiens OX=9606 GN=PHB PE=1 SV=2
383	687	tr|E9PCW0|E9PCW0_HUMAN	117.63	18	18	12900000	4	4	5		23824	Prohibitin (Fragment) OS=Homo sapiens OX=9606 GN=PHB PE=1 SV=2
383	689	tr|C9JW96|C9JW96_HUMAN	117.63	16	16	12900000	4	4	5		26892	Prohibitin (Fragment) OS=Homo sapiens OX=9606 GN=PHB PE=1 SV=2
383	691	P35232|PHB_HUMAN	117.63	14	14	12900000	4	4	5		29804	Prohibitin OS=Homo sapiens OX=9606 GN=PHB PE=1 SV=1
451	1467	P09669|COX6C_HUMAN	115.63	37	37	20700000	4	4	5	Deamidation N	8781	Cytochrome c oxidase subunit 6C OS=Homo sapiens OX=9606 GN=COX6C PE=1 SV=2
384	709	Q01469|FABP5_HUMAN	115.37	36	36	8550000	4	4	5	Carbamidomethylation	15164	Fatty acid-binding protein epidermal OS=Homo sapiens OX=9606 GN=FABP5 PE=1 SV=3
498	561	P06756|ITAV_HUMAN	107.74	4	4	4790000	4	4	4	Carbamidomethylation	116038	Integrin alpha-V OS=Homo sapiens OX=9606 GN=ITGAV PE=1 SV=2
327	1070	tr|E9PDG8|E9PDG8_HUMAN	107.33	6	6	2180000	4	4	4	Deamidation N	91971	Clathrin coat assembly protein AP180 OS=Homo sapiens OX=9606 GN=SNAP91 PE=1 SV=1
327	1071	O60641|AP180_HUMAN	107.33	6	6	2180000	4	4	4	Deamidation N	92502	Clathrin coat assembly protein AP180 OS=Homo sapiens OX=9606 GN=SNAP91 PE=1 SV=2
252	712	P21912|SDHB_HUMAN	104.37	12	12	5420000	4	4	4		31630	Succinate dehydrogenase [ubiquinone] iron-sulfur subunit mitochondrial OS=Homo sapiens OX=9606 GN=SDHB PE=1 SV=3
500	747	P12955|PEPD_HUMAN	103.86	8	8	7710000	4	4	4	Carbamidomethylation	54548	Xaa-Pro dipeptidase OS=Homo sapiens OX=9606 GN=PEPD PE=1 SV=3
382	666	O75947|ATP5H_HUMAN	103.32	25	25	14600000	4	4	5		18491	ATP synthase subunit d mitochondrial OS=Homo sapiens OX=9606 GN=ATP5H PE=1 SV=3
452	1438	P11233|RALA_HUMAN	102.82	18	18	11400000	4	4	5	Deamidation N	23567	Ras-related protein Ral-A OS=Homo sapiens OX=9606 GN=RALA PE=1 SV=1
438	737	Q9UI15|TAGL3_HUMAN	101.75	19	19	1860000	5	4	5	HexNac	22473	Transgelin-3 OS=Homo sapiens OX=9606 GN=TAGLN3 PE=1 SV=2
436	713	tr|F8VVM2|F8VVM2_HUMAN	96.72	11	11	21500000	4	4	5		36161	Phosphate carrier protein mitochondrial OS=Homo sapiens OX=9606 GN=SLC25A3 PE=1 SV=1
436	714	Q00325|MPCP_HUMAN	96.72	10	10	21500000	4	4	5		40095	Phosphate carrier protein mitochondrial OS=Homo sapiens OX=9606 GN=SLC25A3 PE=1 SV=2
324	512	tr|E9PHY5|E9PHY5_HUMAN	94.85	5	5	2270000	4	4	4		104360	Band 4.1-like protein 2 OS=Homo sapiens OX=9606 GN=EPB41L2 PE=1 SV=1
324	513	O43491|E41L2_HUMAN	94.85	4	4	2270000	4	4	4		112588	Band 4.1-like protein 2 OS=Homo sapiens OX=9606 GN=EPB41L2 PE=1 SV=1
440	965	tr|A0A087X054|A0A087X054_HUMAN	92.6	6	6	3960000	4	4	4	Carbamidomethylation; Deamidation N	104779	Hypoxia up-regulated protein 1 OS=Homo sapiens OX=9606 GN=HYOU1 PE=1 SV=1
440	966	Q9Y4L1|HYOU1_HUMAN	92.6	6	6	3960000	4	4	4	Carbamidomethylation; Deamidation N	111335	Hypoxia up-regulated protein 1 OS=Homo sapiens OX=9606 GN=HYOU1 PE=1 SV=1
4	1	P04350|TBB4A_HUMAN	373.79	78	78	52300000	39	3	145	Carbamidomethylation; Oxidation (M); Deamidation N; HydroxylProline; HexNac; HexNacHex	49586	Tubulin beta-4A chain OS=Homo sapiens OX=9606 GN=TUBB4A PE=1 SV=2
7	6	P07437|TBB5_HUMAN	373.59	71	71	53100000	38	3	134	Carbamidomethylation; Oxidation (M); Deamidation N; HexNac	49671	Tubulin beta chain OS=Homo sapiens OX=9606 GN=TUBB PE=1 SV=2
25	72	P68366|TBA4A_HUMAN	328.67	50	50	33200000	28	3	67	Carbamidomethylation; Deamidation N	49924	Tubulin alpha-4A chain OS=Homo sapiens OX=9606 GN=TUBA4A PE=1 SV=1
62	301	P69905|HBA_HUMAN	230.28	64	64	101000000	9	3	35	Oxidation (M); Deamidation N	15258	Hemoglobin subunit alpha OS=Homo sapiens OX=9606 GN=HBA1 PE=1 SV=2
387	844	Q8N111|CEND_HUMAN	172.21	28	28	49000000	3	3	6		14954	Cell cycle exit and neuronal differentiation protein 1 OS=Homo sapiens OX=9606 GN=CEND1 PE=1 SV=1
176	350	tr|H0YK48|H0YK48_HUMAN	167.82	24	24	14500000	7	3	12	Carbamidomethylation	28580	Tropomyosin alpha-1 chain OS=Homo sapiens OX=9606 GN=TPM1 PE=1 SV=1
217	202	tr|H9KV75|H9KV75_HUMAN	167.81	13	13	1580000	9	3	10	Deamidation N; Methoxy-K; Ubiquitination-K	94826	Alpha-actinin-1 OS=Homo sapiens OX=9606 GN=ACTN1 PE=1 SV=1
217	206	P12814|ACTN1_HUMAN	167.81	12	12	1580000	9	3	10	Deamidation N; Methoxy-K; Ubiquitination-K	103058	Alpha-actinin-1 OS=Homo sapiens OX=9606 GN=ACTN1 PE=1 SV=2
164	385	P37235|HPCL1_HUMAN	162.33	36	36	11800000	7	3	11	Carbamidomethylation; Deamidation N	22313	Hippocalcin-like protein 1 OS=Homo sapiens OX=9606 GN=HPCAL1 PE=1 SV=3
174	223	O43707|ACTN4_HUMAN	162.04	9	9	1330000	8	3	9		104854	Alpha-actinin-4 OS=Homo sapiens OX=9606 GN=ACTN4 PE=1 SV=2
419	461	Q9UHD9|UBQL2_HUMAN	161.44	11	11	4310000	5	3	5		65696	Ubiquilin-2 OS=Homo sapiens OX=9606 GN=UBQLN2 PE=1 SV=2
318	452	P62820|RAB1A_HUMAN	154.93	37	37	0	6	3	7	Deamidation N	22678	Ras-related protein Rab-1A OS=Homo sapiens OX=9606 GN=RAB1A PE=1 SV=3
329	548	P02763|A1AG1_HUMAN	148.2	23	23	33600000	4	3	6	Carbamidomethylation	23512	Alpha-1-acid glycoprotein 1 OS=Homo sapiens OX=9606 GN=ORM1 PE=1 SV=1
447	1194	P04271|S100B_HUMAN	145.1	57	57	42100000	3	3	5	Carbamidomethylation; Deamidation N	10713	Protein S100-B OS=Homo sapiens OX=9606 GN=S100B PE=1 SV=2
377	803	P62873|GBB1_HUMAN	145.02	16	16	15300000	4	3	5	Carbamidomethylation; Deamidation N	37377	Guanine nucleotide-binding protein G(I)/G(S)/G(T) subunit beta-1 OS=Homo sapiens OX=9606 GN=GNB1 PE=1 SV=3
336	1111	P10915|HPLN1_HUMAN	143.78	13	13	12600000	3	3	5	Carbamidomethylation; Deamidation N	40166	Hyaluronan and proteoglycan link protein 1 OS=Homo sapiens OX=9606 GN=HAPLN1 PE=2 SV=2
601	1188	Q9NP97|DLRB1_HUMAN	137.82	51	51	7960000	3	3	3	Deamidation N	10922	Dynein light chain roadblock-type 1 OS=Homo sapiens OX=9606 GN=DYNLRB1 PE=1 SV=3
601	1193	tr|B1AKR6|B1AKR6_HUMAN	137.82	33	33	7960000	3	3	3	Deamidation N	16253	Dynein light chain roadblock-type 1 OS=Homo sapiens OX=9606 GN=DYNLRB1 PE=1 SV=1
511	986	Q9NZ45|CISD1_HUMAN	136.02	35	35	32800000	3	3	4	Carbamidomethylation	12199	CDGSH iron-sulfur domain-containing protein 1 OS=Homo sapiens OX=9606 GN=CISD1 PE=1 SV=1
270	516	Q5VTE0|EF1A3_HUMAN	134.65	22	22	1110000	7	3	7	Carbamidomethylation; Deamidation N	50185	Putative elongation factor 1-alpha-like 3 OS=Homo sapiens OX=9606 GN=EEF1A1P5 PE=5 SV=1
270	515	P68104|EF1A1_HUMAN	134.65	22	22	1110000	7	3	7	Carbamidomethylation; Deamidation N	50141	Elongation factor 1-alpha 1 OS=Homo sapiens OX=9606 GN=EEF1A1 PE=1 SV=1
388	889	tr|A2A2V1|A2A2V1_HUMAN	133.3	13	13	29500000	3	3	6	Carbamidomethylation	27279	Major prion protein (Fragment) OS=Homo sapiens OX=9606 GN=PRNP PE=1 SV=1
388	890	P04156|PRIO_HUMAN	133.3	13	13	29500000	3	3	6	Carbamidomethylation	27661	Major prion protein OS=Homo sapiens OX=9606 GN=PRNP PE=1 SV=1
381	663	P20336|RAB3A_HUMAN	129.67	21	21	23000000	4	3	6	Carbamidomethylation	24984	Ras-related protein Rab-3A OS=Homo sapiens OX=9606 GN=RAB3A PE=1 SV=1
497	921	tr|B7Z613|B7Z613_HUMAN	129.25	14	14	2580000	4	3	4	Carbamidomethylation; Deamidation N	33273	Neuronal membrane glycoprotein M6-b OS=Homo sapiens OX=9606 GN=GPM6B PE=1 SV=1
298	790	tr|C9JFR7|C9JFR7_HUMAN	125.37	37	37	58500000	3	3	6		11333	Cytochrome c (Fragment) OS=Homo sapiens OX=9606 GN=CYCS PE=1 SV=1
298	791	P99999|CYC_HUMAN	125.37	35	35	58500000	3	3	6		11749	Cytochrome c OS=Homo sapiens OX=9606 GN=CYCS PE=1 SV=2
444	1080	P09211|GSTP1_HUMAN	125.26	24	24	9830000	3	3	3	Deamidation N	23356	Glutathione S-transferase P OS=Homo sapiens OX=9606 GN=GSTP1 PE=1 SV=2
603	852	tr|B7Z641|B7Z641_HUMAN	125.21	5	5	6480000	3	3	3		90500	V-type proton ATPase subunit a OS=Homo sapiens OX=9606 GN=ATP6V0A1 PE=1 SV=1
603	853	tr|B7Z2A9|B7Z2A9_HUMAN	125.21	5	5	6480000	3	3	3		91157	V-type proton ATPase subunit a OS=Homo sapiens OX=9606 GN=ATP6V0A1 PE=1 SV=1
603	854	Q93050|VPP1_HUMAN	125.21	5	5	6480000	3	3	3		96413	V-type proton ATPase 116 kDa subunit a isoform 1 OS=Homo sapiens OX=9606 GN=ATP6V0A1 PE=1 SV=3
513	1190	P02766|TTHY_HUMAN	125.2	33	33	11700000	3	3	3	Deamidation N	15887	Transthyretin OS=Homo sapiens OX=9606 GN=TTR PE=1 SV=1
519	1860	Q7Z3B1|NEGR1_HUMAN	124.2	16	16	14100000	3	3	4	Carbamidomethylation; Deamidation N	38719	Neuronal growth regulator 1 OS=Homo sapiens OX=9606 GN=NEGR1 PE=1 SV=3
442	760	Q6PUV4|CPLX2_HUMAN	123.79	30	30	16600000	3	3	3	Carbamidomethylation	15394	Complexin-2 OS=Homo sapiens OX=9606 GN=CPLX2 PE=2 SV=2
331	639	P13521|SCG2_HUMAN	122.5	7	7	1950000	4	3	4		70941	Secretogranin-2 OS=Homo sapiens OX=9606 GN=SCG2 PE=1 SV=2
527	1715	Q99497|PARK7_HUMAN	120.58	22	22	10200000	3	3	3	Carbamidomethylation; Deamidation N	19891	Protein/nucleic acid deglycase DJ-1 OS=Homo sapiens OX=9606 GN=PARK7 PE=1 SV=2
315	296	P12235|ADT1_HUMAN	119.57	21	21	10000000	7	3	7	Carbamidomethylation	33065	ADP/ATP translocase 1 OS=Homo sapiens OX=9606 GN=SLC25A4 PE=1 SV=4
338	795	tr|F8W1R7|F8W1R7_HUMAN	119.2	22	22	11100000	3	3	4	Carbamidomethylation	16290	Myosin light polypeptide 6 OS=Homo sapiens OX=9606 GN=MYL6 PE=1 SV=1
338	796	P60660|MYL6_HUMAN	119.2	21	21	11100000	3	3	4	Carbamidomethylation	16930	Myosin light polypeptide 6 OS=Homo sapiens OX=9606 GN=MYL6 PE=1 SV=2
338	798	tr|G8JLA2|G8JLA2_HUMAN	119.2	21	21	11100000	3	3	4	Carbamidomethylation	17089	Myosin light polypeptide 6 OS=Homo sapiens OX=9606 GN=MYL6 PE=1 SV=1
338	797	tr|J3KND3|J3KND3_HUMAN	119.2	21	21	11100000	3	3	4	Carbamidomethylation	17058	Myosin light polypeptide 6 OS=Homo sapiens OX=9606 GN=MYL6 PE=1 SV=1
338	799	tr|G3V1V0|G3V1V0_HUMAN	119.2	20	20	11100000	3	3	4	Carbamidomethylation	18037	Myosin light polypeptide 6 OS=Homo sapiens OX=9606 GN=MYL6 PE=1 SV=1
338	801	tr|B7Z6Z4|B7Z6Z4_HUMAN	119.2	13	13	11100000	3	3	4	Carbamidomethylation	26707	Myosin light polypeptide 6 OS=Homo sapiens OX=9606 GN=MYL6 PE=1 SV=1
385	981	P14625|ENPL_HUMAN	118.37	6	6	974000	5	3	5	Deamidation N	92469	Endoplasmin OS=Homo sapiens OX=9606 GN=HSP90B1 PE=1 SV=1
505	829	tr|F6U1T9|F6U1T9_HUMAN	116.94	26	26	7840000	3	3	4	Carbamidomethylation	18208	Calcineurin subunit B type 1 OS=Homo sapiens OX=9606 GN=PPP3R1 PE=1 SV=1
505	830	P63098|CANB1_HUMAN	116.94	24	24	7840000	3	3	4	Carbamidomethylation	19300	Calcineurin subunit B type 1 OS=Homo sapiens OX=9606 GN=PPP3R1 PE=1 SV=2
505	831	tr|D3YTA9|D3YTA9_HUMAN	116.94	22	22	7840000	3	3	4	Carbamidomethylation	21445	Calcineurin subunit B type 1 OS=Homo sapiens OX=9606 GN=PPP3R1 PE=1 SV=1
506	859	tr|C9J8H1|C9J8H1_HUMAN	116.85	17	17	13900000	3	3	4		23539	V-type proton ATPase subunit E 1 (Fragment) OS=Homo sapiens OX=9606 GN=ATP6V1E1 PE=1 SV=1
506	860	P36543|VATE1_HUMAN	116.85	15	15	13900000	3	3	4		26145	V-type proton ATPase subunit E 1 OS=Homo sapiens OX=9606 GN=ATP6V1E1 PE=1 SV=1
300	856	P04792|HSPB1_HUMAN	114.32	18	18	61500000	3	3	8	Deamidation N	22783	Heat shock protein beta-1 OS=Homo sapiens OX=9606 GN=HSPB1 PE=1 SV=2
532	1212	P14415|AT1B2_HUMAN	113.87	10	10	21600000	3	3	4		33367	Sodium/potassium-transporting ATPase subunit beta-2 OS=Homo sapiens OX=9606 GN=ATP1B2 PE=1 SV=3
609	1359	tr|U3KQG5|U3KQG5_HUMAN	113.76	23	23	7870000	3	3	3	Carbamidomethylation; Deamidation N	22522	OX-2 membrane glycoprotein (Fragment) OS=Homo sapiens OX=9606 GN=CD200 PE=1 SV=1
609	1370	P41217|OX2G_HUMAN	113.76	17	17	7870000	3	3	3	Carbamidomethylation; Deamidation N	31264	OX-2 membrane glycoprotein OS=Homo sapiens OX=9606 GN=CD200 PE=1 SV=4
649	1254	P23297|S10A1_HUMAN	112.17	27	27	16500000	3	3	3		10546	Protein S100-A1 OS=Homo sapiens OX=9606 GN=S100A1 PE=1 SV=2
649	1256	tr|Q5T7Y6|Q5T7Y6_HUMAN	112.17	17	17	16500000	3	3	3		15895	Protein S100 OS=Homo sapiens OX=9606 GN=S100A1 PE=1 SV=1
613	792	P02647|APOA1_HUMAN	111.93	14	14	2580000	3	3	3		30778	Apolipoprotein A-I OS=Homo sapiens OX=9606 GN=APOA1 PE=1 SV=1
503	808	Q9UQB8|BAIP2_HUMAN	111.12	6	6	1340000	3	3	3		60868	Brain-specific angiogenesis inhibitor 1-associated protein 2 OS=Homo sapiens OX=9606 GN=BAIAP2 PE=1 SV=1
503	809	tr|I3L4C2|I3L4C2_HUMAN	111.12	6	6	1340000	3	3	3		61381	Brain-specific angiogenesis inhibitor 1-associated protein 2 OS=Homo sapiens OX=9606 GN=BAIAP2 PE=1 SV=1
509	955	P63000|RAC1_HUMAN	110.64	17	17	8350000	3	3	3	Carbamidomethylation	21450	Ras-related C3 botulinum toxin substrate 1 OS=Homo sapiens OX=9606 GN=RAC1 PE=1 SV=1
457	1110	P36542|ATPG_HUMAN	110.63	8	8	3950000	3	3	3		32996	ATP synthase subunit gamma mitochondrial OS=Homo sapiens OX=9606 GN=ATP5C1 PE=1 SV=1
449	895	Q7L0J3|SV2A_HUMAN	107.78	6	6	7950000	3	3	5		82695	Synaptic vesicle glycoprotein 2A OS=Homo sapiens OX=9606 GN=SV2A PE=1 SV=1
453	1525	Q08174|PCDH1_HUMAN	107.47	4	4	3160000	3	3	4	Deamidation N	114743	Protocadherin-1 OS=Homo sapiens OX=9606 GN=PCDH1 PE=1 SV=2
393	1030	tr|A0A0A0MS51|A0A0A0MS51_HUMAN	105.82	5	5	4930000	3	3	3		82526	Gelsolin OS=Homo sapiens OX=9606 GN=GSN PE=1 SV=1
393	1031	tr|A0A0A0MT01|A0A0A0MT01_HUMAN	105.82	4	4	4930000	3	3	3		84745	Gelsolin OS=Homo sapiens OX=9606 GN=GSN PE=1 SV=1
393	1032	P06396|GELS_HUMAN	105.82	4	4	4930000	3	3	3		85697	Gelsolin OS=Homo sapiens OX=9606 GN=GSN PE=1 SV=1
605	863	P00492|HPRT_HUMAN	105.55	15	15	4080000	3	3	3		24579	Hypoxanthine-guanine phosphoribosyltransferase OS=Homo sapiens OX=9606 GN=HPRT1 PE=1 SV=2
517	1339	O94772|LY6H_HUMAN	105.51	26	26	14600000	3	3	4	Carbamidomethylation; HydroxylProline; Methoxy-K	14669	Lymphocyte antigen 6H OS=Homo sapiens OX=9606 GN=LY6H PE=1 SV=1
620	977	tr|F2Z2Y8|F2Z2Y8_HUMAN	104.64	16	16	4280000	3	3	3		23280	Toll-interacting protein OS=Homo sapiens OX=9606 GN=TOLLIP PE=1 SV=1
620	982	Q9H0E2|TOLIP_HUMAN	104.64	12	12	4280000	3	3	3		30282	Toll-interacting protein OS=Homo sapiens OX=9606 GN=TOLLIP PE=1 SV=1
454	1014	Q9Y6R1|S4A4_HUMAN	104.33	3	3	1690000	3	3	3	Carbamidomethylation	121460	Electrogenic sodium bicarbonate cotransporter 1 OS=Homo sapiens OX=9606 GN=SLC4A4 PE=1 SV=1
375	552	tr|B4DJV2|B4DJV2_HUMAN	103.92	9	9	8890000	4	3	5		50432	Citrate synthase OS=Homo sapiens OX=9606 GN=CS PE=1 SV=1
375	554	O75390|CISY_HUMAN	103.92	8	8	8890000	4	3	5		51712	Citrate synthase mitochondrial OS=Homo sapiens OX=9606 GN=CS PE=1 SV=2
443	769	Q7L099|RUFY3_HUMAN	102.65	6	6	2410000	3	3	3		52965	Protein RUFY3 OS=Homo sapiens OX=9606 GN=RUFY3 PE=1 SV=1
611	894	P61586|RHOA_HUMAN	102.09	16	16	5590000	3	3	3	Carbamidomethylation	21768	Transforming protein RhoA OS=Homo sapiens OX=9606 GN=RHOA PE=1 SV=1
621	1257	tr|A0A1W2PRF6|A0A1W2PRF6_HUMAN	101.51	16	16	3330000	3	3	3	Deamidation N	36289	Lysosome membrane protein 2 OS=Homo sapiens OX=9606 GN=SCARB2 PE=1 SV=1
621	1264	tr|A0A1W2PPX5|A0A1W2PPX5_HUMAN	101.51	12	12	3330000	3	3	3	Deamidation N	49204	Lysosome membrane protein 2 OS=Homo sapiens OX=9606 GN=SCARB2 PE=1 SV=1
621	1265	tr|A0A1W2PQR6|A0A1W2PQR6_HUMAN	101.51	12	12	3330000	3	3	3	Deamidation N	51049	Lysosome membrane protein 2 OS=Homo sapiens OX=9606 GN=SCARB2 PE=1 SV=1
621	1266	tr|A0A1W2PQB7|A0A1W2PQB7_HUMAN	101.51	11	11	3330000	3	3	3	Deamidation N	53422	Lysosome membrane protein 2 OS=Homo sapiens OX=9606 GN=SCARB2 PE=1 SV=1
621	1268	tr|A0A1W2PS43|A0A1W2PS43_HUMAN	101.51	11	11	3330000	3	3	3	Deamidation N	53892	Lysosome membrane protein 2 OS=Homo sapiens OX=9606 GN=SCARB2 PE=1 SV=1
621	1269	Q14108|SCRB2_HUMAN	101.51	11	11	3330000	3	3	3	Deamidation N	54290	Lysosome membrane protein 2 OS=Homo sapiens OX=9606 GN=SCARB2 PE=1 SV=2
621	1271	tr|A0A1W2PRS1|A0A1W2PRS1_HUMAN	101.51	10	10	3330000	3	3	3	Deamidation N	58167	Lysosome membrane protein 2 (Fragment) OS=Homo sapiens OX=9606 GN=SCARB2 PE=1 SV=1
518	1135	P02787|TRFE_HUMAN	99.89	6	6	892000	3	3	3	Carbamidomethylation; Deamidation N	77064	Serotransferrin OS=Homo sapiens OX=9606 GN=TF PE=1 SV=3
616	1274	P22392|NDKB_HUMAN	98.47	26	26	5190000	3	3	3	Deamidation N	17298	Nucleoside diphosphate kinase B OS=Homo sapiens OX=9606 GN=NME2 PE=1 SV=1
616	1277	tr|J3KPD9|J3KPD9_HUMAN	98.47	20	20	5190000	3	3	3	Deamidation N	22422	NME1-NME2 readthrough OS=Homo sapiens OX=9606 GN=NME1-NME2 PE=1 SV=1
616	1284	tr|Q32Q12|Q32Q12_HUMAN	98.47	13	13	5190000	3	3	3	Deamidation N	32642	Nucleoside diphosphate kinase OS=Homo sapiens OX=9606 GN=NME1-NME2 PE=1 SV=1
612	899	O00483|NDUA4_HUMAN	97.76	35	35	8560000	3	3	3	Carbamidomethylation	9370	Cytochrome c oxidase subunit NDUFA4 OS=Homo sapiens OX=9606 GN=NDUFA4 PE=1 SV=1
337	1102	O43181|NDUS4_HUMAN	97.53	19	19	11700000	3	3	4	Deamidation N	20108	NADH dehydrogenase [ubiquinone] iron-sulfur protein 4 mitochondrial OS=Homo sapiens OX=9606 GN=NDUFS4 PE=1 SV=1
607	875	Q02252|MMSA_HUMAN	97.28	6	6	4820000	3	3	3	Carbamidomethylation	57840	Methylmalonate-semialdehyde dehydrogenase [acylating] mitochondrial OS=Homo sapiens OX=9606 GN=ALDH6A1 PE=1 SV=2
341	1307	P25713|MT3_HUMAN	96.89	35	35	11000000	3	3	7	Carbamidomethylation	6927	Metallothionein-3 OS=Homo sapiens OX=9606 GN=MT3 PE=1 SV=1
341	1308	tr|H3BQX6|H3BQX6_HUMAN	96.89	30	30	11000000	3	3	7	Carbamidomethylation	8412	Metallothionein OS=Homo sapiens OX=9606 GN=MT3 PE=1 SV=1
341	1317	tr|H3BPK2|H3BPK2_HUMAN	96.89	21	21	11000000	3	3	7	Carbamidomethylation	11725	Metallothionein-3 OS=Homo sapiens OX=9606 GN=MT3 PE=1 SV=1
379	810	tr|G3V1Q4|G3V1Q4_HUMAN	96.3	10	10	4850000	4	3	5	Deamidation N	46566	Septin-7 OS=Homo sapiens OX=9606 GN=SEPT7 PE=1 SV=2
379	811	tr|E7ES33|E7ES33_HUMAN	96.3	9	9	4850000	4	3	5	Deamidation N	48716	Septin-7 OS=Homo sapiens OX=9606 GN=SEPT7 PE=1 SV=3
379	813	tr|E7EPK1|E7EPK1_HUMAN	96.3	9	9	4850000	4	3	5	Deamidation N	50695	Septin-7 OS=Homo sapiens OX=9606 GN=SEPT7 PE=1 SV=2
379	812	Q16181|SEPT7_HUMAN	96.3	9	9	4850000	4	3	5	Deamidation N	50680	Septin-7 OS=Homo sapiens OX=9606 GN=SEPT7 PE=1 SV=2
448	870	tr|G3V3A0|G3V3A0_HUMAN	96.22	15	15	8940000	3	3	4		23406	Alpha-1-antichymotrypsin OS=Homo sapiens OX=9606 GN=SERPINA3 PE=1 SV=1
448	874	P01011|AACT_HUMAN	96.22	7	7	8940000	3	3	4		47651	Alpha-1-antichymotrypsin OS=Homo sapiens OX=9606 GN=SERPINA3 PE=1 SV=2
610	893	tr|E5RIW3|E5RIW3_HUMAN	91.7	42	42	3240000	3	3	3	Carbamidomethylation	10080	Tubulin-specific chaperone A OS=Homo sapiens OX=9606 GN=TBCA PE=1 SV=1
610	896	O75347|TBCA_HUMAN	91.7	32	32	3240000	3	3	3	Carbamidomethylation	12855	Tubulin-specific chaperone A OS=Homo sapiens OX=9606 GN=TBCA PE=1 SV=3
610	897	tr|E5RJD8|E5RJD8_HUMAN	91.7	29	29	3240000	3	3	3	Carbamidomethylation	14306	Tubulin-specific chaperone A OS=Homo sapiens OX=9606 GN=TBCA PE=1 SV=1
534	1349	P14174|MIF_HUMAN	91.45	17	17	15900000	3	3	4	Carbamidomethylation	12476	Macrophage migration inhibitory factor OS=Homo sapiens OX=9606 GN=MIF PE=1 SV=4
390	1447	O14556|G3PT_HUMAN	90.83	11	11	59700000	4	3	6	Carbamidomethylation; Deamidation N; HexNac	44501	Glyceraldehyde-3-phosphate dehydrogenase testis-specific OS=Homo sapiens OX=9606 GN=GAPDHS PE=1 SV=2
617	969	P00403|COX2_HUMAN	90.67	11	11	48700000	3	3	3		25565	Cytochrome c oxidase subunit 2 OS=Homo sapiens OX=9606 GN=MT-CO2 PE=1 SV=1
614	920	P19338|NUCL_HUMAN	90.66	4	4	3600000	3	3	3		76615	Nucleolin OS=Homo sapiens OX=9606 GN=NCL PE=1 SV=3
512	1501	Q08722|CD47_HUMAN	89.94	9	9	33800000	3	3	4	Deamidation N	35214	Leukocyte surface antigen CD47 OS=Homo sapiens OX=9606 GN=CD47 PE=1 SV=1
619	975	P61088|UBE2N_HUMAN	89.45	18	18	14200000	3	3	3	Carbamidomethylation	17138	Ubiquitin-conjugating enzyme E2 N OS=Homo sapiens OX=9606 GN=UBE2N PE=1 SV=1
389	1151	O95202|LETM1_HUMAN	88.94	6	6	6630000	3	3	3	Ubiquitination-K; HLys	83354	Mitochondrial proton/calcium exchanger protein OS=Homo sapiens OX=9606 GN=LETM1 PE=1 SV=1
615	932	P49448|DHE4_HUMAN	88.7	6	6	6270000	3	3	3	Carbamidomethylation	61434	Glutamate dehydrogenase 2 mitochondrial OS=Homo sapiens OX=9606 GN=GLUD2 PE=1 SV=2
615	931	P00367|DHE3_HUMAN	88.7	6	6	6270000	3	3	3	Carbamidomethylation	61398	Glutamate dehydrogenase 1 mitochondrial OS=Homo sapiens OX=9606 GN=GLUD1 PE=1 SV=2
625	1026	P50990|TCPQ_HUMAN	88.54	6	6	1930000	3	3	3		59621	T-complex protein 1 subunit theta OS=Homo sapiens OX=9606 GN=CCT8 PE=1 SV=4
450	936	O43852|CALU_HUMAN	87.37	9	9	7570000	3	3	4		37107	Calumenin OS=Homo sapiens OX=9606 GN=CALU PE=1 SV=2
628	1061	O95782|AP2A1_HUMAN	85.3	3	3	2500000	3	3	3	Carbamidomethylation	107546	AP-2 complex subunit alpha-1 OS=Homo sapiens OX=9606 GN=AP2A1 PE=1 SV=3
301	1069	P09496|CLCA_HUMAN	85.28	7	7	19600000	3	3	6		27077	Clathrin light chain A OS=Homo sapiens OX=9606 GN=CLTA PE=1 SV=1
514	1048	P27338|AOFB_HUMAN	83.79	5	5	5320000	3	3	3		58763	Amine oxidase [flavin-containing] B OS=Homo sapiens OX=9606 GN=MAOB PE=1 SV=3
520	1561	O75915|PRAF3_HUMAN	79.06	20	20	7530000	3	3	3	Deamidation N	21615	PRA1 family protein 3 OS=Homo sapiens OX=9606 GN=ARL6IP5 PE=1 SV=1
630	1386	tr|H0YN26|H0YN26_HUMAN	78.89	25	25	2880000	3	3	3	Carbamidomethylation; Deamidation N	19997	Acidic leucine-rich nuclear phosphoprotein 32 family member A OS=Homo sapiens OX=9606 GN=ANP32A PE=1 SV=1
630	1387	P39687|AN32A_HUMAN	78.89	18	18	2880000	3	3	3	Carbamidomethylation; Deamidation N	28585	Acidic leucine-rich nuclear phosphoprotein 32 family member A OS=Homo sapiens OX=9606 GN=ANP32A PE=1 SV=1
502	782	tr|E7EV59|E7EV59_HUMAN	78.72	8	8	4280000	3	3	3	Carbamidomethylation	35708	V-type proton ATPase subunit C OS=Homo sapiens OX=9606 GN=ATP6V1C1 PE=1 SV=1
502	783	P21283|VATC1_HUMAN	78.72	7	7	4280000	3	3	3	Carbamidomethylation	43942	V-type proton ATPase subunit C 1 OS=Homo sapiens OX=9606 GN=ATP6V1C1 PE=1 SV=4
626	1545	Q9NVJ2|ARL8B_HUMAN	74.77	26	26	3330000	3	3	3	Deamidation N	21539	ADP-ribosylation factor-like protein 8B OS=Homo sapiens OX=9606 GN=ARL8B PE=1 SV=1
626	1544	Q96BM9|ARL8A_HUMAN	74.77	26	26	3330000	3	3	3	Deamidation N	21416	ADP-ribosylation factor-like protein 8A OS=Homo sapiens OX=9606 GN=ARL8A PE=1 SV=1
622	1000	Q7L1I2|SV2B_HUMAN	73.84	4	4	16000000	3	3	3		77444	Synaptic vesicle glycoprotein 2B OS=Homo sapiens OX=9606 GN=SV2B PE=1 SV=1
624	1017	tr|B4DJ81|B4DJ81_HUMAN	73.83	6	6	810000	3	3	3	Carbamidomethylation	66922	NADH-ubiquinone oxidoreductase 75 kDa subunit mitochondrial OS=Homo sapiens OX=9606 GN=NDUFS1 PE=1 SV=1
624	1018	P28331|NDUS1_HUMAN	73.83	5	5	810000	3	3	3	Carbamidomethylation	79468	NADH-ubiquinone oxidoreductase 75 kDa subunit mitochondrial OS=Homo sapiens OX=9606 GN=NDUFS1 PE=1 SV=3
515	1045	tr|E9PDL2|E9PDL2_HUMAN	71.25	4	4	3060000	3	3	3		86327	Dipeptidyl aminopeptidase-like protein 6 OS=Homo sapiens OX=9606 GN=DPP6 PE=1 SV=1
515	1046	tr|E9PF59|E9PF59_HUMAN	71.25	4	4	3060000	3	3	3		91246	Dipeptidyl aminopeptidase-like protein 6 OS=Homo sapiens OX=9606 GN=DPP6 PE=1 SV=1
515	1047	P42658|DPP6_HUMAN	71.25	3	3	3060000	3	3	3		97588	Dipeptidyl aminopeptidase-like protein 6 OS=Homo sapiens OX=9606 GN=DPP6 PE=1 SV=2
623	1012	tr|E9PPC8|E9PPC8_HUMAN	66.81	23	23	4490000	3	3	3		15365	Serine/threonine-protein phosphatase (Fragment) OS=Homo sapiens OX=9606 GN=PPP3CA PE=1 SV=1
623	1013	tr|E9PK68|E9PK68_HUMAN	66.81	20	20	4490000	3	3	3		17027	Serine/threonine-protein phosphatase (Fragment) OS=Homo sapiens OX=9606 GN=PPP3CA PE=1 SV=1
623	1015	Q08209|PP2BA_HUMAN	66.81	6	6	4490000	3	3	3		58688	Serine/threonine-protein phosphatase 2B catalytic subunit alpha isoform OS=Homo sapiens OX=9606 GN=PPP3CA PE=1 SV=1
6	7	Q13885|TBB2A_HUMAN	369.37	67	67	116000000	35	2	133	Carbamidomethylation; Oxidation (M); Deamidation N	49907	Tubulin beta-2A chain OS=Homo sapiens OX=9606 GN=TUBB2A PE=1 SV=1
19	33	P13591|NCAM1_HUMAN	298.63	32	32	6720000	27	2	73	Carbamidomethylation; Oxidation (M); Deamidation N	94574	Neural cell adhesion molecule 1 OS=Homo sapiens OX=9606 GN=NCAM1 PE=1 SV=3
19	32	tr|A0A087WX77|A0A087WX77_HUMAN	298.63	32	32	6720000	27	2	73	Carbamidomethylation; Oxidation (M); Deamidation N	94543	Neural cell adhesion molecule 1 OS=Homo sapiens OX=9606 GN=NCAM1 PE=1 SV=1
17	65	tr|F5H5D3|F5H5D3_HUMAN	295.01	41	41	0	31	2	75	Carbamidomethylation; Deamidation N; HydroxylProline; Methoxy-K; HexNacHex; 2 more	57730	Tubulin alpha chain OS=Homo sapiens OX=9606 GN=TUBA1C PE=1 SV=1
131	174	tr|I3L170|I3L170_HUMAN	232.61	34	34	5110000	13	2	18	Phosphoserine (pS)	35671	Microtubule-associated protein OS=Homo sapiens OX=9606 GN=MAPT PE=1 SV=1
83	391	P02042|HBD_HUMAN	195.94	54	54	1110000	9	2	27	Carbamidomethylation; Deamidation N; HLys	16055	Hemoglobin subunit delta OS=Homo sapiens OX=9606 GN=HBD PE=1 SV=2
202	392	O15020|SPTN2_HUMAN	158.16	3	3	2360000	5	2	6	Carbamidomethylation	271323	Spectrin beta chain non-erythrocytic 2 OS=Homo sapiens OX=9606 GN=SPTBN2 PE=1 SV=3
240	707	Q13554|KCC2B_HUMAN	153.03	13	13	0	6	2	8	Deamidation N	72678	Calcium/calmodulin-dependent protein kinase type II subunit beta OS=Homo sapiens OX=9606 GN=CAMK2B PE=1 SV=3
224	387	tr|Q5SWX3|Q5SWX3_HUMAN	145.21	23	23	835000	6	2	8	Carbamidomethylation	57797	Calcium/calmodulin-dependent protein kinase (CaM kinase) II gamma isoform CRA_n OS=Homo sapiens OX=9606 GN=CAMK2G PE=1 SV=1
224	388	tr|A0A0A0MS52|A0A0A0MS52_HUMAN	145.21	22	22	835000	6	2	8	Carbamidomethylation	60201	Calcium/calmodulin-dependent protein kinase (CaM kinase) II gamma isoform CRA_a OS=Homo sapiens OX=9606 GN=CAMK2G PE=1 SV=1
224	390	tr|A0A0A0MT11|A0A0A0MT11_HUMAN	145.21	22	22	835000	6	2	8	Carbamidomethylation	62607	Calcium/calmodulin-dependent protein kinase type II subunit gamma OS=Homo sapiens OX=9606 GN=CAMK2G PE=1 SV=1
224	389	Q13555|KCC2G_HUMAN	145.21	22	22	835000	6	2	8	Carbamidomethylation	62609	Calcium/calmodulin-dependent protein kinase type II subunit gamma OS=Homo sapiens OX=9606 GN=CAMK2G PE=1 SV=3
167	632	Q96KK5|H2A1H_HUMAN	139.53	37	37	41600000	5	2	12	Deamidation N	13906	Histone H2A type 1-H OS=Homo sapiens OX=9606 GN=HIST1H2AH PE=1 SV=3
167	631	Q99878|H2A1J_HUMAN	139.53	37	37	41600000	5	2	12	Deamidation N	13936	Histone H2A type 1-J OS=Homo sapiens OX=9606 GN=HIST1H2AJ PE=1 SV=3
167	635	Q16777|H2A2C_HUMAN	139.53	36	36	41600000	5	2	12	Deamidation N	13988	Histone H2A type 2-C OS=Homo sapiens OX=9606 GN=HIST2H2AC PE=1 SV=4
167	634	Q9BTM1|H2AJ_HUMAN	139.53	36	36	41600000	5	2	12	Deamidation N	14019	Histone H2A.J OS=Homo sapiens OX=9606 GN=H2AFJ PE=1 SV=1
167	638	P20671|H2A1D_HUMAN	139.53	36	36	41600000	5	2	12	Deamidation N	14107	Histone H2A type 1-D OS=Homo sapiens OX=9606 GN=HIST1H2AD PE=1 SV=2
167	637	P0C0S8|H2A1_HUMAN	139.53	36	36	41600000	5	2	12	Deamidation N	14091	Histone H2A type 1 OS=Homo sapiens OX=9606 GN=HIST1H2AG PE=1 SV=2
167	636	Q6FI13|H2A2A_HUMAN	139.53	36	36	41600000	5	2	12	Deamidation N	14095	Histone H2A type 2-A OS=Homo sapiens OX=9606 GN=HIST2H2AA3 PE=1 SV=3
167	642	tr|A0A0U1RR32|A0A0U1RR32_HUMAN	139.53	28	28	41600000	5	2	12	Deamidation N	18482	Histone H2A OS=Homo sapiens OX=9606 GN=hCG_2039566 PE=3 SV=1
167	643	tr|A0A0U1RRH7|A0A0U1RRH7_HUMAN	139.53	28	28	41600000	5	2	12	Deamidation N	18553	Histone H2A OS=Homo sapiens OX=9606 PE=3 SV=1
295	1081	P12532|KCRU_HUMAN	138	12	12	2130000	4	2	5	Carbamidomethylation; HexNac	47037	Creatine kinase U-type mitochondrial OS=Homo sapiens OX=9606 GN=CKMT1A PE=1 SV=1
292	563	tr|K7ERG3|K7ERG3_HUMAN	134.88	25	25	5230000	5	2	8		19307	Tropomyosin alpha-4 chain (Fragment) OS=Homo sapiens OX=9606 GN=TPM4 PE=1 SV=1
292	564	tr|K7ENT6|K7ENT6_HUMAN	134.88	23	23	5230000	5	2	8		20621	Tropomyosin alpha-4 chain (Fragment) OS=Homo sapiens OX=9606 GN=TPM4 PE=1 SV=1
292	565	P67936|TPM4_HUMAN	134.88	17	17	5230000	5	2	8		28522	Tropomyosin alpha-4 chain OS=Homo sapiens OX=9606 GN=TPM4 PE=1 SV=3
332	1352	Q9UM19|HPCL4_HUMAN	127.36	28	28	2130000	4	2	6	Deamidation N	22202	Hippocalcin-like protein 4 OS=Homo sapiens OX=9606 GN=HPCAL4 PE=1 SV=3
531	1178	tr|J3QRU4|J3QRU4_HUMAN	124.96	29	29	47400000	2	2	4		12251	Vesicle-associated membrane protein 2 OS=Homo sapiens OX=9606 GN=VAMP2 PE=4 SV=2
531	1179	P63027|VAMP2_HUMAN	124.96	28	28	47400000	2	2	4		12663	Vesicle-associated membrane protein 2 OS=Homo sapiens OX=9606 GN=VAMP2 PE=1 SV=3
531	1180	tr|F8WCA0|F8WCA0_HUMAN	124.96	28	28	47400000	2	2	4		12934	Vesicle-associated membrane protein 2 OS=Homo sapiens OX=9606 GN=VAMP2 PE=4 SV=1
531	1181	tr|L7N2F9|L7N2F9_HUMAN	124.96	27	27	47400000	2	2	4		13068	Uncharacterized protein (Fragment) OS=Homo sapiens OX=9606 PE=4 SV=1
325	557	Q9NZN3|EHD3_HUMAN	123.39	12	12	702000	6	2	6	Deamidation N	60887	EH domain-containing protein 3 OS=Homo sapiens OX=9606 GN=EHD3 PE=1 SV=2
360	384	P12236|ADT3_HUMAN	123.27	18	18	11200000	6	2	6		32866	ADP/ATP translocase 3 OS=Homo sapiens OX=9606 GN=SLC25A6 PE=1 SV=4
422	511	P15311|EZRI_HUMAN	121.95	8	8	4000000	5	2	5		69413	Ezrin OS=Homo sapiens OX=9606 GN=EZR PE=1 SV=4
422	510	tr|E7EQR4|E7EQR4_HUMAN	121.95	8	8	4000000	5	2	5		69372	Ezrin OS=Homo sapiens OX=9606 GN=EZR PE=1 SV=3
648	1217	tr|A0A1W2PQV2|A0A1W2PQV2_HUMAN	120.79	30	30	20300000	2	2	3	Carbamidomethylation; Deamidation N	11118	Glycine cleavage system H protein mitochondrial (Fragment) OS=Homo sapiens OX=9606 GN=GCSH PE=1 SV=1
648	1218	tr|H3BUH9|H3BUH9_HUMAN	120.79	25	25	20300000	2	2	3	Carbamidomethylation; Deamidation N	12782	Glycine cleavage system H protein mitochondrial (Fragment) OS=Homo sapiens OX=9606 GN=GCSH PE=1 SV=2
648	1232	P23434|GCSH_HUMAN	120.79	17	17	20300000	2	2	3	Carbamidomethylation; Deamidation N	18885	Glycine cleavage system H protein mitochondrial OS=Homo sapiens OX=9606 GN=GCSH PE=1 SV=2
87	1159	tr|A0A0A0MSM0|A0A0A0MSM0_HUMAN	116.21	4	4	4250000000	4	2	25	Carbamidomethylation; Deamidation N	88842	Heat shock protein 105 kDa OS=Homo sapiens OX=9606 GN=HSPH1 PE=1 SV=1
87	1160	Q92598|HS105_HUMAN	116.21	4	4	4250000000	4	2	25	Carbamidomethylation; Deamidation N	96865	Heat shock protein 105 kDa OS=Homo sapiens OX=9606 GN=HSPH1 PE=1 SV=1
461	1235	P08247|SYPH_HUMAN	113.76	7	7	85500000	2	2	5	Carbamidomethylation	33845	Synaptophysin OS=Homo sapiens OX=9606 GN=SYP PE=1 SV=3
827	1305	Q00577|PURA_HUMAN	112.76	10	10	4340000	2	2	2		34911	Transcriptional activator protein Pur-alpha OS=Homo sapiens OX=9606 GN=PURA PE=1 SV=2
604	1306	Q9H9B4|SFXN1_HUMAN	111.28	11	11	2990000	3	2	3	Deamidation N	35619	Sideroflexin-1 OS=Homo sapiens OX=9606 GN=SFXN1 PE=1 SV=4
627	1060	P16152|CBR1_HUMAN	107.87	12	12	2280000	3	2	3	Carbamidomethylation	30375	Carbonyl reductase [NADPH] 1 OS=Homo sapiens OX=9606 GN=CBR1 PE=1 SV=3
647	1195	tr|B5MCD7|B5MCD7_HUMAN	107.26	14	14	15000000	2	2	3		18465	Synaptogyrin-1 OS=Homo sapiens OX=9606 GN=SYNGR1 PE=1 SV=1
647	1198	O43759|SNG1_HUMAN	107.26	10	10	15000000	2	2	3		25456	Synaptogyrin-1 OS=Homo sapiens OX=9606 GN=SYNGR1 PE=1 SV=2
340	1230	tr|E9PIM6|E9PIM6_HUMAN	106.2	16	16	66800000	2	2	7	Carbamidomethylation	16928	Thy-1 membrane glycoprotein (Fragment) OS=Homo sapiens OX=9606 GN=THY1 PE=1 SV=8
340	1231	P04216|THY1_HUMAN	106.2	15	15	66800000	2	2	7	Carbamidomethylation	17935	Thy-1 membrane glycoprotein OS=Homo sapiens OX=9606 GN=THY1 PE=1 SV=2
340	1233	tr|E9PNQ8|E9PNQ8_HUMAN	106.2	15	15	66800000	2	2	7	Carbamidomethylation	18165	Thy-1 membrane glycoprotein (Fragment) OS=Homo sapiens OX=9606 GN=THY1 PE=1 SV=1
825	1246	P01877|IGHA2_HUMAN	105.35	7	7	6980000	2	2	2		36591	Immunoglobulin heavy constant alpha 2 OS=Homo sapiens OX=9606 GN=IGHA2 PE=1 SV=4
825	1245	tr|A0A0G2JMB2|A0A0G2JMB2_HUMAN	105.35	7	7	6980000	2	2	2		36508	Immunoglobulin heavy constant alpha 2 (Fragment) OS=Homo sapiens OX=9606 GN=IGHA2 PE=1 SV=1
825	1247	tr|A0A286YEY5|A0A286YEY5_HUMAN	105.35	6	6	6980000	2	2	2		42334	Immunoglobulin heavy constant alpha 2 (Fragment) OS=Homo sapiens OX=9606 GN=IGHA2 PE=1 SV=1
533	1251	O76070|SYUG_HUMAN	105.15	26	26	7150000	2	2	3		13331	Gamma-synuclein OS=Homo sapiens OX=9606 GN=SNCG PE=1 SV=2
821	1214	tr|E7EWP0|E7EWP0_HUMAN	104.81	20	20	3770000	2	2	2		20038	NADH dehydrogenase [ubiquinone] 1 beta subcomplex subunit 5 mitochondrial OS=Homo sapiens OX=9606 GN=NDUFB5 PE=1 SV=1
821	1215	O43674|NDUB5_HUMAN	104.81	19	19	3770000	2	2	2		21750	NADH dehydrogenase [ubiquinone] 1 beta subcomplex subunit 5 mitochondrial OS=Homo sapiens OX=9606 GN=NDUFB5 PE=1 SV=1
821	1216	tr|H0Y886|H0Y886_HUMAN	104.81	17	17	3770000	2	2	2		23553	NADH dehydrogenase [ubiquinone] 1 beta subcomplex subunit 5 mitochondrial (Fragment) OS=Homo sapiens OX=9606 GN=NDUFB5 PE=1 SV=1
824	1241	P24534|EF1B_HUMAN	102.92	12	12	1840000	2	2	2		24764	Elongation factor 1-beta OS=Homo sapiens OX=9606 GN=EEF1B2 PE=1 SV=3
386	755	tr|A0A0C4DH22|A0A0C4DH22_HUMAN	102.7	4	4	1100000	3	2	3		98375	Band 4.1-like protein 1 OS=Homo sapiens OX=9606 GN=EPB41L1 PE=1 SV=1
386	756	Q9H4G0|E41L1_HUMAN	102.7	4	4	1100000	3	2	3		98503	Band 4.1-like protein 1 OS=Homo sapiens OX=9606 GN=EPB41L1 PE=1 SV=2
834	1342	Q04837|SSBP_HUMAN	102.64	18	18	2160000	2	2	2		17260	Single-stranded DNA-binding protein mitochondrial OS=Homo sapiens OX=9606 GN=SSBP1 PE=1 SV=1
863	1523	Q15185|TEBP_HUMAN	101.02	15	15	8380000	2	2	2	Carbamidomethylation	18697	Prostaglandin E synthase 3 OS=Homo sapiens OX=9606 GN=PTGES3 PE=1 SV=1
863	1524	tr|A0A087WYT3|A0A087WYT3_HUMAN	101.02	15	15	8380000	2	2	2	Carbamidomethylation	19155	Prostaglandin E synthase 3 OS=Homo sapiens OX=9606 GN=PTGES3 PE=1 SV=1
303	1133	P14854|CX6B1_HUMAN	100.61	23	23	11000000	2	2	6	Carbamidomethylation	10192	Cytochrome c oxidase subunit 6B1 OS=Homo sapiens OX=9606 GN=COX6B1 PE=1 SV=2
499	722	P31150|GDIA_HUMAN	100.54	9	9	4430000	4	2	4	Carbamidomethylation	50583	Rab GDP dissociation inhibitor alpha OS=Homo sapiens OX=9606 GN=GDI1 PE=1 SV=2
606	864	tr|B1AHR1|B1AHR1_HUMAN	99.85	11	11	3940000	3	2	3		33601	Neuronal-specific septin-3 OS=Homo sapiens OX=9606 GN=SEPT3 PE=1 SV=1
606	865	Q9UH03|SEPT3_HUMAN	99.85	9	9	3940000	3	2	3		40704	Neuronal-specific septin-3 OS=Homo sapiens OX=9606 GN=SEPT3 PE=1 SV=3
507	888	P32119|PRDX2_HUMAN	99.7	15	15	8110000	3	2	4		21892	Peroxiredoxin-2 OS=Homo sapiens OX=9606 GN=PRDX2 PE=1 SV=5
823	1238	P81605|DCD_HUMAN	99.42	31	31	3710000	2	2	2	Carbamidomethylation	11284	Dermcidin OS=Homo sapiens OX=9606 GN=DCD PE=1 SV=2
633	1125	Q9UMS0|NFU1_HUMAN	98.66	10	10	3060000	2	2	2		28463	NFU1 iron-sulfur cluster scaffold homolog mitochondrial OS=Homo sapiens OX=9606 GN=NFU1 PE=1 SV=2
526	1112	tr|G3V325|G3V325_HUMAN	97.94	3	3	8740000	2	2	3		84110	ATP5MF-PTCD1 readthrough OS=Homo sapiens OX=9606 GN=ATP5MF-PTCD1 PE=4 SV=1
844	1415	O75061|AUXI_HUMAN	97.76	3	3	7240000	2	2	2		99997	Putative tyrosine-protein phosphatase auxilin OS=Homo sapiens OX=9606 GN=DNAJC6 PE=1 SV=3
462	1275	Q9Y277|VDAC3_HUMAN	97.41	8	8	1510000	3	2	5	Deamidation N	30659	Voltage-dependent anion-selective channel protein 3 OS=Homo sapiens OX=9606 GN=VDAC3 PE=1 SV=1
460	1213	P49006|MRP_HUMAN	97.4	14	14	4530000	2	2	4		19529	MARCKS-related protein OS=Homo sapiens OX=9606 GN=MARCKSL1 PE=1 SV=2
644	1166	O95169|NDUB8_HUMAN	96.82	13	13	4560000	2	2	2		21766	NADH dehydrogenase [ubiquinone] 1 beta subcomplex subunit 8 mitochondrial OS=Homo sapiens OX=9606 GN=NDUFB8 PE=1 SV=1
822	1236	P04080|CYTB_HUMAN	96.46	24	24	7280000	2	2	2		11140	Cystatin-B OS=Homo sapiens OX=9606 GN=CSTB PE=1 SV=2
645	1468	P63215|GBG3_HUMAN	96.2	29	29	8210000	2	2	2	Carbamidomethylation	8305	Guanine nucleotide-binding protein G(I)/G(S)/G(O) subunit gamma-3 OS=Homo sapiens OX=9606 GN=GNG3 PE=1 SV=1
530	1411	Q01813|PFKAP_HUMAN	95.58	3	3	2910000	2	2	2		85596	ATP-dependent 6-phosphofructokinase platelet type OS=Homo sapiens OX=9606 GN=PFKP PE=1 SV=2
525	1642	tr|F6SYF8|F6SYF8_HUMAN	95.31	13	13	16500000	2	2	2	Carbamidomethylation; HexNac; Nitrotyrosine; Phosphoserine (pS)	39950	Dickkopf-related protein 3 OS=Homo sapiens OX=9606 GN=DKK3 PE=1 SV=1
523	1099	P23526|SAHH_HUMAN	95.09	6	6	2490000	2	2	2		47716	Adenosylhomocysteinase OS=Homo sapiens OX=9606 GN=AHCY PE=1 SV=4
849	1843	tr|H0YL43|H0YL43_HUMAN	94.9	22	22	974000	2	2	2	Deamidation N	17728	Reticulocalbin-2 (Fragment) OS=Homo sapiens OX=9606 GN=RCN2 PE=1 SV=1
849	1845	Q14257|RCN2_HUMAN	94.9	11	11	974000	2	2	2	Deamidation N	36876	Reticulocalbin-2 OS=Homo sapiens OX=9606 GN=RCN2 PE=1 SV=1
836	1888	P61204|ARF3_HUMAN	93.79	19	19	2210000	2	2	2	Deamidation N	20601	ADP-ribosylation factor 3 OS=Homo sapiens OX=9606 GN=ARF3 PE=1 SV=2
836	1887	P84077|ARF1_HUMAN	93.79	19	19	2210000	2	2	2	Deamidation N	20697	ADP-ribosylation factor 1 OS=Homo sapiens OX=9606 GN=ARF1 PE=1 SV=2
455	1051	O95197|RTN3_HUMAN	93.78	3	3	19900000	3	2	5		112611	Reticulon-3 OS=Homo sapiens OX=9606 GN=RTN3 PE=1 SV=2
835	1363	tr|B1AJQ6|B1AJQ6_HUMAN	93.45	12	12	6110000	2	2	2		24576	Syntaxin-12 (Fragment) OS=Homo sapiens OX=9606 GN=STX12 PE=1 SV=2
835	1366	Q86Y82|STX12_HUMAN	93.45	9	9	6110000	2	2	2		31642	Syntaxin-12 OS=Homo sapiens OX=9606 GN=STX12 PE=1 SV=1
837	1371	Q07021|C1QBP_HUMAN	93.07	9	9	12600000	2	2	2		31362	Complement component 1 Q subcomponent-binding protein mitochondrial OS=Homo sapiens OX=9606 GN=C1QBP PE=1 SV=1
868	1833	tr|E9PJK1|E9PJK1_HUMAN	92.29	22	22	2130000	2	2	2	Carbamidomethylation; Deamidation N	17963	Tetraspanin OS=Homo sapiens OX=9606 GN=CD81 PE=1 SV=1
868	1834	tr|E9PRJ8|E9PRJ8_HUMAN	92.29	17	17	2130000	2	2	2	Carbamidomethylation; Deamidation N	22516	Tetraspanin (Fragment) OS=Homo sapiens OX=9606 GN=CD81 PE=1 SV=1
868	1835	tr|H0YDL9|H0YDL9_HUMAN	92.29	16	16	2130000	2	2	2	Carbamidomethylation; Deamidation N	23803	Tetraspanin (Fragment) OS=Homo sapiens OX=9606 GN=CD81 PE=1 SV=1
868	1836	tr|H0YDJ9|H0YDJ9_HUMAN	92.29	16	16	2130000	2	2	2	Carbamidomethylation; Deamidation N	24440	Tetraspanin (Fragment) OS=Homo sapiens OX=9606 GN=CD81 PE=1 SV=1
868	1837	P60033|CD81_HUMAN	92.29	15	15	2130000	2	2	2	Carbamidomethylation; Deamidation N	25809	CD81 antigen OS=Homo sapiens OX=9606 GN=CD81 PE=1 SV=1
868	1838	tr|E9PIF1|E9PIF1_HUMAN	92.29	15	15	2130000	2	2	2	Carbamidomethylation; Deamidation N	25903	Tetraspanin OS=Homo sapiens OX=9606 GN=CD81 PE=1 SV=1
868	1839	tr|A6NMH8|A6NMH8_HUMAN	92.29	13	13	2130000	2	2	2	Carbamidomethylation; Deamidation N	29806	Tetraspanin OS=Homo sapiens OX=9606 GN=CD81 PE=1 SV=1
545	1912	Q7Z4Y8|AT5L2_HUMAN	91.83	35	35	13700000	2	2	4	HexNac	11037	ATP synthase subunit g 2 mitochondrial OS=Homo sapiens OX=9606 GN=ATP5L2 PE=5 SV=1
639	1719	Q8NFZ8|CADM4_HUMAN	91.31	10	10	1250000	2	2	2	Deamidation N	42785	Cell adhesion molecule 4 OS=Homo sapiens OX=9606 GN=CADM4 PE=1 SV=1
878	1749	O15400|STX7_HUMAN	91.15	11	11	686000	2	2	2	Deamidation N	29816	Syntaxin-7 OS=Homo sapiens OX=9606 GN=STX7 PE=1 SV=4
629	1066	tr|D6RAF8|D6RAF8_HUMAN	90.23	10	10	2780000	2	2	2		23076	Heterogeneous nuclear ribonucleoprotein D0 (Fragment) OS=Homo sapiens OX=9606 GN=HNRNPD PE=1 SV=1
629	1067	Q14103|HNRPD_HUMAN	90.23	6	6	2780000	2	2	2		38434	Heterogeneous nuclear ribonucleoprotein D0 OS=Homo sapiens OX=9606 GN=HNRNPD PE=1 SV=1
650	1278	P19404|NDUV2_HUMAN	89.58	8	8	3520000	2	2	3		27392	NADH dehydrogenase [ubiquinone] flavoprotein 2 mitochondrial OS=Homo sapiens OX=9606 GN=NDUFV2 PE=1 SV=2
650	1280	tr|E7EPT4|E7EPT4_HUMAN	89.58	8	8	3520000	2	2	3		27907	NADH dehydrogenase [ubiquinone] flavoprotein 2 mitochondrial OS=Homo sapiens OX=9606 GN=NDUFV2 PE=1 SV=1
637	1139	Q9H1V8|S6A17_HUMAN	89.49	3	3	2460000	2	2	2		81001	Sodium-dependent neutral amino acid transporter SLC6A17 OS=Homo sapiens OX=9606 GN=SLC6A17 PE=1 SV=3
657	1918	Q9NQP4|PFD4_HUMAN	89.43	20	20	305000	2	2	3	Deamidation N	15314	Prefoldin subunit 4 OS=Homo sapiens OX=9606 GN=PFDN4 PE=1 SV=1
657	1919	tr|E9PQY2|E9PQY2_HUMAN	89.43	20	20	305000	2	2	3	Deamidation N	15599	Prefoldin subunit 4 OS=Homo sapiens OX=9606 GN=PFDN4 PE=1 SV=1
653	1297	P60953|CDC42_HUMAN	88.42	11	11	7110000	2	2	3	Carbamidomethylation	21259	Cell division control protein 42 homolog OS=Homo sapiens OX=9606 GN=CDC42 PE=1 SV=2
535	1393	P13473|LAMP2_HUMAN	87.53	5	5	8640000	2	2	3		44961	Lysosome-associated membrane glycoprotein 2 OS=Homo sapiens OX=9606 GN=LAMP2 PE=1 SV=2
392	1118	P35580|MYH10_HUMAN	87.07	2	2	0	3	2	3	Deamidation N	228997	Myosin-10 OS=Homo sapiens OX=9606 GN=MYH10 PE=1 SV=3
654	1304	O75489|NDUS3_HUMAN	86.7	9	9	3240000	2	2	3		30242	NADH dehydrogenase [ubiquinone] iron-sulfur protein 3 mitochondrial OS=Homo sapiens OX=9606 GN=NDUFS3 PE=1 SV=1
640	1146	tr|A0A087X1I3|A0A087X1I3_HUMAN	85.97	5	5	6010000	2	2	2		56663	Succinate dehydrogenase [ubiquinone] flavoprotein subunit mitochondrial OS=Homo sapiens OX=9606 GN=SDHA PE=1 SV=1
640	1147	tr|D6RFM5|D6RFM5_HUMAN	85.97	4	4	6010000	2	2	2		63567	Succinate dehydrogenase [ubiquinone] flavoprotein subunit mitochondrial OS=Homo sapiens OX=9606 GN=SDHA PE=1 SV=1
640	1149	P31040|SDHA_HUMAN	85.97	4	4	6010000	2	2	2		72692	Succinate dehydrogenase [ubiquinone] flavoprotein subunit mitochondrial OS=Homo sapiens OX=9606 GN=SDHA PE=1 SV=2
832	1334	O43920|NDUS5_HUMAN	85.75	22	22	1400000	2	2	2	Carbamidomethylation	12517	NADH dehydrogenase [ubiquinone] iron-sulfur protein 5 OS=Homo sapiens OX=9606 GN=NDUFS5 PE=1 SV=3
826	1292	Q9UBQ0|VPS29_HUMAN	85.64	13	13	1930000	2	2	2	Carbamidomethylation	20506	Vacuolar protein sorting-associated protein 29 OS=Homo sapiens OX=9606 GN=VPS29 PE=1 SV=1
826	1298	tr|F8VXU5|F8VXU5_HUMAN	85.64	11	11	1930000	2	2	2	Carbamidomethylation	23980	Vacuolar protein sorting-associated protein 29 OS=Homo sapiens OX=9606 GN=VPS29 PE=1 SV=1
658	1439	tr|R4GN43|R4GN43_HUMAN	84.8	27	27	8330000	2	2	3		8510	NADH dehydrogenase [ubiquinone] 1 alpha subcomplex subunit 6 OS=Homo sapiens OX=9606 GN=NDUFA6 PE=1 SV=1
658	1441	tr|A0A0C4DGS0|A0A0C4DGS0_HUMAN	84.8	15	15	8330000	2	2	3		15137	NADH dehydrogenase [ubiquinone] 1 alpha subcomplex subunit 6 OS=Homo sapiens OX=9606 GN=NDUFA6 PE=1 SV=1
658	1442	P56556|NDUA6_HUMAN	84.8	12	12	8330000	2	2	3		17871	NADH dehydrogenase [ubiquinone] 1 alpha subcomplex subunit 6 OS=Homo sapiens OX=9606 GN=NDUFA6 PE=1 SV=3
635	1136	P30533|AMRP_HUMAN	84.44	8	8	1270000	2	2	2		41466	Alpha-2-macroglobulin receptor-associated protein OS=Homo sapiens OX=9606 GN=LRPAP1 PE=1 SV=1
676	1890	tr|B8ZZQ6|B8ZZQ6_HUMAN	83.37	13	13	866000	2	2	2		11759	Prothymosin alpha OS=Homo sapiens OX=9606 GN=PTMA PE=1 SV=1
676	1891	P06454|PTMA_HUMAN	83.37	13	13	866000	2	2	2		12203	Prothymosin alpha OS=Homo sapiens OX=9606 GN=PTMA PE=1 SV=2
676	1892	tr|B8ZZA1|B8ZZA1_HUMAN	83.37	11	11	866000	2	2	2		14252	Prothymosin alpha OS=Homo sapiens OX=9606 GN=PTMA PE=1 SV=1
676	1893	tr|B8ZZW7|B8ZZW7_HUMAN	83.37	10	10	866000	2	2	2		14719	Prothymosin alpha OS=Homo sapiens OX=9606 GN=PTMA PE=1 SV=1
676	1894	tr|H7C2N1|H7C2N1_HUMAN	83.37	9	9	866000	2	2	2		15866	Prothymosin alpha (Fragment) OS=Homo sapiens OX=9606 GN=PTMA PE=1 SV=1
642	1283	P20916|MAG_HUMAN	83.26	4	4	8300000	2	2	2		69069	Myelin-associated glycoprotein OS=Homo sapiens OX=9606 GN=MAG PE=1 SV=1
829	1330	P62942|FKB1A_HUMAN	83	29	29	3260000	2	2	2	Carbamidomethylation	11951	Peptidyl-prolyl cis-trans isomerase FKBP1A OS=Homo sapiens OX=9606 GN=FKBP1A PE=1 SV=2
829	1331	tr|A0A087WZM5|A0A087WZM5_HUMAN	83	24	24	3260000	2	2	2	Carbamidomethylation	14927	Peptidylprolyl isomerase OS=Homo sapiens OX=9606 GN=FKBP1A PE=1 SV=1
656	1410	P41222|PTGDS_HUMAN	82.66	11	11	7080000	2	2	2		21029	Prostaglandin-H2 D-isomerase OS=Homo sapiens OX=9606 GN=PTGDS PE=1 SV=1
656	1412	tr|Q5SQ11|Q5SQ11_HUMAN	82.66	10	10	7080000	2	2	2		21080	Prostaglandin-H2 D-isomerase (Fragment) OS=Homo sapiens OX=9606 GN=PTGDS PE=1 SV=1
528	1757	P05060|SCG1_HUMAN	82.55	6	6	283000	2	2	2	Deamidation N	78276	Secretogranin-1 OS=Homo sapiens OX=9606 GN=CHGB PE=1 SV=2
847	1989	P21281|VATB2_HUMAN	82.17	7	7	2440000	2	2	2	Carbamidomethylation; Deamidation N	56501	V-type proton ATPase subunit B brain isoform OS=Homo sapiens OX=9606 GN=ATP6V1B2 PE=1 SV=3
643	1165	Q9UPY8|MARE3_HUMAN	81.06	7	7	5670000	2	2	2	Carbamidomethylation	31982	Microtubule-associated protein RP/EB family member 3 OS=Homo sapiens OX=9606 GN=MAPRE3 PE=1 SV=1
830	1332	Q9UM22|EPDR1_HUMAN	80.91	10	10	1720000	2	2	2	Carbamidomethylation	25437	Mammalian ependymin-related protein 1 OS=Homo sapiens OX=9606 GN=EPDR1 PE=1 SV=2
522	1096	tr|E7EV99|E7EV99_HUMAN	80.01	3	3	4160000	2	2	2		70056	Alpha-adducin OS=Homo sapiens OX=9606 GN=ADD1 PE=1 SV=1
522	1097	tr|E7ENY0|E7ENY0_HUMAN	80.01	3	3	4160000	2	2	2		73404	Alpha-adducin OS=Homo sapiens OX=9606 GN=ADD1 PE=1 SV=1
522	1098	P35611|ADDA_HUMAN	80.01	3	3	4160000	2	2	2		80955	Alpha-adducin OS=Homo sapiens OX=9606 GN=ADD1 PE=1 SV=2
833	1336	Q15773|MLF2_HUMAN	79.22	8	8	927000	2	2	2		28147	Myeloid leukemia factor 2 OS=Homo sapiens OX=9606 GN=MLF2 PE=1 SV=1
655	2255	P54727|RD23B_HUMAN	78.3	9	9	4120000	2	2	2	HydroxylProline; Ubiquitination-K	43171	UV excision repair protein RAD23 homolog B OS=Homo sapiens OX=9606 GN=RAD23B PE=1 SV=1
874	1578	Q9UPV7|PHF24_HUMAN	76.74	6	6	3400000	2	2	2		45192	PHD finger protein 24 OS=Homo sapiens OX=9606 GN=PHF24 PE=1 SV=2
843	1413	tr|Q5TA02|Q5TA02_HUMAN	76.62	9	9	2470000	2	2	2		23341	Glutathione S-transferase omega-1 (Fragment) OS=Homo sapiens OX=9606 GN=GSTO1 PE=1 SV=1
843	1414	P78417|GSTO1_HUMAN	76.62	7	7	2470000	2	2	2		27566	Glutathione S-transferase omega-1 OS=Homo sapiens OX=9606 GN=GSTO1 PE=1 SV=2
864	1529	tr|F8VQ14|F8VQ14_HUMAN	76.52	7	7	1230000	2	2	2		44813	T-complex protein 1 subunit beta OS=Homo sapiens OX=9606 GN=CCT2 PE=1 SV=1
864	1530	tr|F5GWF6|F5GWF6_HUMAN	76.52	5	5	1230000	2	2	2		56807	T-complex protein 1 subunit beta OS=Homo sapiens OX=9606 GN=CCT2 PE=1 SV=2
864	1531	P78371|TCPB_HUMAN	76.52	5	5	1230000	2	2	2		57488	T-complex protein 1 subunit beta OS=Homo sapiens OX=9606 GN=CCT2 PE=1 SV=4
867	1559	P23588|IF4B_HUMAN	76.31	3	3	788000	2	2	2		69151	Eukaryotic translation initiation factor 4B OS=Homo sapiens OX=9606 GN=EIF4B PE=1 SV=2
867	1560	tr|E7EX17|E7EX17_HUMAN	76.31	3	3	788000	2	2	2		69698	Eukaryotic translation initiation factor 4B OS=Homo sapiens OX=9606 GN=EIF4B PE=1 SV=1
839	1374	tr|G3V5L7|G3V5L7_HUMAN	76.11	9	9	4890000	2	2	2		24139	Protein NDRG2 (Fragment) OS=Homo sapiens OX=9606 GN=NDRG2 PE=1 SV=1
839	1381	tr|G3V5H8|G3V5H8_HUMAN	76.11	7	7	4890000	2	2	2		30496	Protein NDRG2 (Fragment) OS=Homo sapiens OX=9606 GN=NDRG2 PE=1 SV=1
839	1382	tr|G3V578|G3V578_HUMAN	76.11	7	7	4890000	2	2	2		31093	Protein NDRG2 OS=Homo sapiens OX=9606 GN=NDRG2 PE=1 SV=1
839	1383	tr|H0YJT9|H0YJT9_HUMAN	76.11	7	7	4890000	2	2	2		31352	Protein NDRG2 (Fragment) OS=Homo sapiens OX=9606 GN=NDRG2 PE=1 SV=1
839	1384	tr|G3V4S9|G3V4S9_HUMAN	76.11	6	6	4890000	2	2	2		33422	Protein NDRG2 (Fragment) OS=Homo sapiens OX=9606 GN=NDRG2 PE=1 SV=8
839	1389	tr|A0A0A0MS87|A0A0A0MS87_HUMAN	76.11	5	5	4890000	2	2	2		39545	Protein NDRG2 OS=Homo sapiens OX=9606 GN=NDRG2 PE=1 SV=1
839	1391	Q9UN36|NDRG2_HUMAN	76.11	5	5	4890000	2	2	2		40798	Protein NDRG2 OS=Homo sapiens OX=9606 GN=NDRG2 PE=1 SV=2
871	1572	P08559|ODPA_HUMAN	75.97	5	5	42800000	2	2	2		43296	Pyruvate dehydrogenase E1 component subunit alpha somatic form mitochondrial OS=Homo sapiens OX=9606 GN=PDHA1 PE=1 SV=3
842	1403	P22061|PIMT_HUMAN	75.67	10	10	1200000	2	2	2		24636	Protein-L-isoaspartate(D-aspartate) O-methyltransferase OS=Homo sapiens OX=9606 GN=PCMT1 PE=1 SV=4
842	1404	tr|F6S8N6|F6S8N6_HUMAN	75.67	9	9	1200000	2	2	2		26627	Protein-L-isoaspartate(D-aspartate) O-methyltransferase OS=Homo sapiens OX=9606 GN=PCMT1 PE=1 SV=1
842	1405	tr|A0A0A0MRJ6|A0A0A0MRJ6_HUMAN	75.67	8	8	1200000	2	2	2		30315	Protein-L-isoaspartate O-methyltransferase OS=Homo sapiens OX=9606 GN=PCMT1 PE=1 SV=1
842	1406	tr|H7BY58|H7BY58_HUMAN	75.67	8	8	1200000	2	2	2		30358	Protein-L-isoaspartate O-methyltransferase OS=Homo sapiens OX=9606 GN=PCMT1 PE=1 SV=1
870	1568	tr|S4R3U6|S4R3U6_HUMAN	75.34	10	10	3950000	2	2	2		32414	Amyloid-like protein 1 (Fragment) OS=Homo sapiens OX=9606 GN=APLP1 PE=1 SV=1
870	1569	tr|F5GZ08|F5GZ08_HUMAN	75.34	5	5	3950000	2	2	2		68491	Amyloid-like protein 1 OS=Homo sapiens OX=9606 GN=APLP1 PE=1 SV=1
870	1570	tr|B7Z4G8|B7Z4G8_HUMAN	75.34	4	4	3950000	2	2	2		71702	Amyloid-like protein 1 OS=Homo sapiens OX=9606 GN=APLP1 PE=1 SV=1
870	1571	P51693|APLP1_HUMAN	75.34	4	4	3950000	2	2	2		72176	Amyloid-like protein 1 OS=Homo sapiens OX=9606 GN=APLP1 PE=1 SV=3
846	1421	tr|H0Y512|H0Y512_HUMAN	75.02	5	5	3210000	2	2	2		45414	Adipocyte plasma membrane-associated protein (Fragment) OS=Homo sapiens OX=9606 GN=APMAP PE=1 SV=1
846	1422	Q9HDC9|APMAP_HUMAN	75.02	5	5	3210000	2	2	2		46480	Adipocyte plasma membrane-associated protein OS=Homo sapiens OX=9606 GN=APMAP PE=1 SV=2
848	1445	tr|I3L159|I3L159_HUMAN	74.66	7	7	1740000	2	2	2		26578	Heme oxygenase 2 (Fragment) OS=Homo sapiens OX=9606 GN=HMOX2 PE=1 SV=1
848	1446	tr|I3L1F5|I3L1F5_HUMAN	74.66	7	7	1740000	2	2	2		27683	Heme oxygenase 2 (Fragment) OS=Homo sapiens OX=9606 GN=HMOX2 PE=1 SV=1
848	1449	P30519|HMOX2_HUMAN	74.66	5	5	1740000	2	2	2		36033	Heme oxygenase 2 OS=Homo sapiens OX=9606 GN=HMOX2 PE=1 SV=2
848	1453	tr|A0A087WT44|A0A087WT44_HUMAN	74.66	5	5	1740000	2	2	2		41669	Heme oxygenase 2 OS=Homo sapiens OX=9606 GN=HMOX2 PE=1 SV=1
860	1514	P60981|DEST_HUMAN	74.35	15	15	2220000	2	2	2	Carbamidomethylation	18506	Destrin OS=Homo sapiens OX=9606 GN=DSTN PE=1 SV=3
841	1402	P62269|RS18_HUMAN	73.96	11	11	2720000	2	2	2		17719	40S ribosomal protein S18 OS=Homo sapiens OX=9606 GN=RPS18 PE=1 SV=3
634	1129	tr|Q5VT82|Q5VT82_HUMAN	71.75	2	2	2210000	2	2	2	Carbamidomethylation	113711	Protocadherin-9 OS=Homo sapiens OX=9606 GN=PCDH9 PE=1 SV=1
634	1131	tr|B7ZM79|B7ZM79_HUMAN	71.75	2	2	2210000	2	2	2	Carbamidomethylation	131640	PCDH9 protein OS=Homo sapiens OX=9606 GN=PCDH9 PE=1 SV=1
634	1132	Q9HC56|PCDH9_HUMAN	71.75	2	2	2210000	2	2	2	Carbamidomethylation	136064	Protocadherin-9 OS=Homo sapiens OX=9606 GN=PCDH9 PE=1 SV=2
840	1385	P30049|ATPD_HUMAN	70.7	14	14	13300000	2	2	2		17490	ATP synthase subunit delta mitochondrial OS=Homo sapiens OX=9606 GN=ATP5D PE=1 SV=2
876	2209	P61769|B2MG_HUMAN	69.03	27	27	4330000	2	2	2	Carbamidomethylation; Deamidation N	13715	Beta-2-microglobulin OS=Homo sapiens OX=9606 GN=B2M PE=1 SV=1
855	1486	Q15056|IF4H_HUMAN	68.02	8	8	4950000	2	2	2		27385	Eukaryotic translation initiation factor 4H OS=Homo sapiens OX=9606 GN=EIF4H PE=1 SV=5
660	1502	tr|V9PBN7|V9PBN7_HUMAN	68.01	12	12	3450000	2	2	2		31826	Aquaporin 4 isoform delta4 OS=Homo sapiens OX=9606 GN=AQP4 PE=1 SV=1
660	1503	P55087|AQP4_HUMAN	68.01	11	11	3450000	2	2	2		34830	Aquaporin-4 OS=Homo sapiens OX=9606 GN=AQP4 PE=1 SV=2
850	1459	O75438|NDUB1_HUMAN	67.39	33	33	3680000	2	2	2		6961	NADH dehydrogenase [ubiquinone] 1 beta subcomplex subunit 1 OS=Homo sapiens OX=9606 GN=NDUFB1 PE=1 SV=1
845	1416	Q9Y5Z4|HEBP2_HUMAN	67.12	10	10	1910000	2	2	2		22875	Heme-binding protein 2 OS=Homo sapiens OX=9606 GN=HEBP2 PE=1 SV=1
646	1517	tr|C9JFZ1|C9JFZ1_HUMAN	67.11	3	3	480000	2	2	2	Carbamidomethylation	149305	Synaptojanin-1 OS=Homo sapiens OX=9606 GN=SYNJ1 PE=1 SV=1
646	1518	O43426|SYNJ1_HUMAN	67.11	2	2	480000	2	2	2	Carbamidomethylation	173102	Synaptojanin-1 OS=Homo sapiens OX=9606 GN=SYNJ1 PE=1 SV=2
646	1519	tr|J3KQV8|J3KQV8_HUMAN	67.11	2	2	480000	2	2	2	Carbamidomethylation	177548	Synaptojanin-1 OS=Homo sapiens OX=9606 GN=SYNJ1 PE=1 SV=1
852	1470	tr|F5GYN4|F5GYN4_HUMAN	66.37	10	10	2460000	2	2	2		28051	Ubiquitin thioesterase OTUB1 OS=Homo sapiens OX=9606 GN=OTUB1 PE=1 SV=1
852	1471	Q96FW1|OTUB1_HUMAN	66.37	8	8	2460000	2	2	2		31284	Ubiquitin thioesterase OTUB1 OS=Homo sapiens OX=9606 GN=OTUB1 PE=1 SV=2
852	1472	tr|J3KR44|J3KR44_HUMAN	66.37	8	8	2460000	2	2	2		31440	Ubiquitin thioesterase OS=Homo sapiens OX=9606 GN=OTUB1 PE=1 SV=2
852	1473	tr|F5H6Q1|F5H6Q1_HUMAN	66.37	8	8	2460000	2	2	2		32301	Ubiquitin thioesterase OS=Homo sapiens OX=9606 GN=OTUB1 PE=1 SV=1
521	1075	Q8WXD2|SCG3_HUMAN	64.73	4	4	7530000	2	2	3		53005	Secretogranin-3 OS=Homo sapiens OX=9606 GN=SCG3 PE=1 SV=3
854	1483	tr|F5GZQ3|F5GZQ3_HUMAN	63.72	4	4	1730000	2	2	2		49597	Trifunctional enzyme subunit beta mitochondrial OS=Homo sapiens OX=9606 GN=HADHB PE=1 SV=1
854	1484	P55084|ECHB_HUMAN	63.72	4	4	1730000	2	2	2		51294	Trifunctional enzyme subunit beta mitochondrial OS=Homo sapiens OX=9606 GN=HADHB PE=1 SV=3
861	1520	P55809|SCOT1_HUMAN	63.55	4	4	2880000	2	2	2	Carbamidomethylation	56158	Succinyl-CoA:3-ketoacid coenzyme A transferase 1 mitochondrial OS=Homo sapiens OX=9606 GN=OXCT1 PE=1 SV=1
869	1562	Q15818|NPTX1_HUMAN	63.48	4	4	3620000	2	2	2		47122	Neuronal pentraxin-1 OS=Homo sapiens OX=9606 GN=NPTX1 PE=2 SV=2
851	1464	P62993|GRB2_HUMAN	62.64	8	8	1020000	2	2	2		25206	Growth factor receptor-bound protein 2 OS=Homo sapiens OX=9606 GN=GRB2 PE=1 SV=1
857	1500	P41208|CETN2_HUMAN	60.02	12	12	4010000	2	2	2		19738	Centrin-2 OS=Homo sapiens OX=9606 GN=CETN2 PE=1 SV=1
659	1495	tr|A0A0C4DGX8|A0A0C4DGX8_HUMAN	57.69	7	7	3940000	2	2	2		31610	ATPase H+ transporting lysosomal accessory protein 1 isoform CRA_c OS=Homo sapiens OX=9606 GN=ATP6AP1 PE=1 SV=1
659	1497	Q15904|VAS1_HUMAN	57.69	4	4	3940000	2	2	2		52026	V-type proton ATPase subunit S1 OS=Homo sapiens OX=9606 GN=ATP6AP1 PE=1 SV=2
856	1491	tr|K7ESA3|K7ESA3_HUMAN	57.55	21	21	1100000	2	2	2		13576	Synaptic vesicle membrane protein VAT-1 homolog (Fragment) OS=Homo sapiens OX=9606 GN=VAT1 PE=1 SV=1
856	1492	tr|K7ENX2|K7ENX2_HUMAN	57.55	17	17	1100000	2	2	2		16349	Synaptic vesicle membrane protein VAT-1 homolog (Fragment) OS=Homo sapiens OX=9606 GN=VAT1 PE=1 SV=1
856	1493	tr|K7EM19|K7EM19_HUMAN	57.55	17	17	1100000	2	2	2		16648	Synaptic vesicle membrane protein VAT-1 homolog (Fragment) OS=Homo sapiens OX=9606 GN=VAT1 PE=1 SV=1
856	1494	Q99536|VAT1_HUMAN	57.55	7	7	1100000	2	2	2		41920	Synaptic vesicle membrane protein VAT-1 homolog OS=Homo sapiens OX=9606 GN=VAT1 PE=1 SV=2
859	1512	O75746|CMC1_HUMAN	55.74	4	4	2520000	2	2	2	Carbamidomethylation	74762	Calcium-binding mitochondrial carrier protein Aralar1 OS=Homo sapiens OX=9606 GN=SLC25A12 PE=1 SV=2
875	1584	tr|F5H3S6|F5H3S6_HUMAN	52.01	4	4	5000000	2	2	2		42728	TOM1-like protein 2 OS=Homo sapiens OX=9606 GN=TOM1L2 PE=1 SV=1
875	1585	tr|B7Z2U2|B7Z2U2_HUMAN	52.01	4	4	5000000	2	2	2		42878	TOM1-like protein 2 OS=Homo sapiens OX=9606 GN=TOM1L2 PE=1 SV=1
875	1586	Q6ZVM7|TM1L2_HUMAN	52.01	3	3	5000000	2	2	2		55556	TOM1-like protein 2 OS=Homo sapiens OX=9606 GN=TOM1L2 PE=1 SV=1
343	2647	tr|B1AN99|B1AN99_HUMAN	49.95	14	14	0	2	2	3	Carbamidomethylation	19288	Trypsin-3 (Fragment) OS=Homo sapiens OX=9606 GN=PRSS3 PE=1 SV=8
343	2648	P35030|TRY3_HUMAN	49.95	8	8	0	2	2	3	Carbamidomethylation	32529	Trypsin-3 OS=Homo sapiens OX=9606 GN=PRSS3 PE=1 SV=2
873	1577	P07954|FUMH_HUMAN	48.99	3	3	3100000	2	2	2		54637	Fumarate hydratase mitochondrial OS=Homo sapiens OX=9606 GN=FH PE=1 SV=3
877	1587	tr|Q5T9Q8|Q5T9Q8_HUMAN	46.06	11	11	482000	2	2	2		17088	Succinate--CoA ligase [ADP-forming] subunit beta mitochondrial (Fragment) OS=Homo sapiens OX=9606 GN=SUCLA2 PE=1 SV=1
877	1588	tr|Q5T9Q5|Q5T9Q5_HUMAN	46.06	6	6	482000	2	2	2		32040	Succinate--CoA ligase [ADP-forming] subunit beta mitochondrial (Fragment) OS=Homo sapiens OX=9606 GN=SUCLA2 PE=1 SV=1
877	1589	Q9P2R7|SUCB1_HUMAN	46.06	4	4	482000	2	2	2		50317	Succinate--CoA ligase [ADP-forming] subunit beta mitochondrial OS=Homo sapiens OX=9606 GN=SUCLA2 PE=1 SV=3
662	1599	tr|Q5TEC6|Q5TEC6_HUMAN	42.95	13	13	21000000	2	2	3		15430	Histone H3 OS=Homo sapiens OX=9606 GN=HIST2H3PS2 PE=1 SV=1
3	2	P68371|TBB4B_HUMAN	378.25	77	77	13200000	40	1	149	Carbamidomethylation; Oxidation (M); Deamidation N; HydroxylProline; HexNac; HexNacHex	49831	Tubulin beta-4B chain OS=Homo sapiens OX=9606 GN=TUBB4B PE=1 SV=1
13	82	tr|A0A0B4J269|A0A0B4J269_HUMAN	323.01	34	34	0	30	1	90	Carbamidomethylation; Oxidation (M); Deamidation N; HexNac; Phosphoserine (pS)	88382	Uncharacterized protein OS=Homo sapiens OX=9606 PE=1 SV=1
26	117	Q6PEY2|TBA3E_HUMAN	316.25	44	44	0	22	1	64	Carbamidomethylation; Deamidation N; Methoxy-K; Ubiquitination-K	49859	Tubulin alpha-3E chain OS=Homo sapiens OX=9606 GN=TUBA3E PE=1 SV=2
42	126	P68032|ACTC_HUMAN	255.28	39	39	0	17	1	42	Carbamidomethylation; Oxidation (M); Deamidation N	42019	Actin alpha cardiac muscle 1 OS=Homo sapiens OX=9606 GN=ACTC1 PE=1 SV=1
42	125	P68133|ACTS_HUMAN	255.28	39	39	0	17	1	42	Carbamidomethylation; Oxidation (M); Deamidation N	42051	Actin alpha skeletal muscle OS=Homo sapiens OX=9606 GN=ACTA1 PE=1 SV=1
86	90	tr|H7BY57|H7BY57_HUMAN	247.04	15	15	0	17	1	22	Carbamidomethylation; Deamidation N	116706	Neurofascin (Fragment) OS=Homo sapiens OX=9606 GN=NFASC PE=1 SV=1
28	178	Q3ZCM7|TBB8_HUMAN	245.36	31	31	94300	17	1	63	Carbamidomethylation; Oxidation (M); Deamidation N; HexNac; HexNacHex	49776	Tubulin beta-8 chain OS=Homo sapiens OX=9606 GN=TUBB8 PE=1 SV=2
73	88	O94856|NFASC_HUMAN	244.36	12	12	3520000	17	1	22	Carbamidomethylation; Deamidation N	150026	Neurofascin OS=Homo sapiens OX=9606 GN=NFASC PE=1 SV=4
31	179	A6NNZ2|TBB8L_HUMAN	236.49	33	33	0	16	1	58	Carbamidomethylation; Oxidation (M); Deamidation N; HydroxylProline; HexNac; HLys	49573	Tubulin beta-8 chain-like protein LOC260334 OS=Homo sapiens OX=9606 PE=1 SV=1
74	523	tr|G3V1N2|G3V1N2_HUMAN	207.51	58	58	0	7	1	30	Oxidation (M); Deamidation N; HydroxylProline; HexNac; HLys; Phosphoserine (pS)	11948	HCG1745306 isoform CRA_a OS=Homo sapiens OX=9606 GN=HBA2 PE=1 SV=1
185	353	P01861|IGHG4_HUMAN	200.72	32	32	0	7	1	13	Carbamidomethylation; Deamidation N	35941	Immunoglobulin heavy constant gamma 4 OS=Homo sapiens OX=9606 GN=IGHG4 PE=1 SV=1
185	354	tr|A0A286YFJ8|A0A286YFJ8_HUMAN	200.72	27	27	0	7	1	13	Carbamidomethylation; Deamidation N	43832	Immunoglobulin heavy constant gamma 4 (Fragment) OS=Homo sapiens OX=9606 GN=IGHG4 PE=1 SV=1
186	299	tr|E9PD68|E9PD68_HUMAN	161.98	11	11	1570000	6	1	9		62030	Dihydropyrimidinase-related protein 1 OS=Homo sapiens OX=9606 GN=CRMP1 PE=1 SV=1
186	300	Q14194|DPYL1_HUMAN	161.98	11	11	1570000	6	1	9		62184	Dihydropyrimidinase-related protein 1 OS=Homo sapiens OX=9606 GN=CRMP1 PE=1 SV=1
199	286	tr|D6R938|D6R938_HUMAN	159.18	15	15	280000	7	1	10	Carbamidomethylation	56298	Calcium/calmodulin-dependent protein kinase (CaM kinase) II delta isoform CRA_e OS=Homo sapiens OX=9606 GN=CAMK2D PE=1 SV=1
199	287	Q13557|KCC2D_HUMAN	159.18	15	15	280000	7	1	10	Carbamidomethylation	56369	Calcium/calmodulin-dependent protein kinase type II subunit delta OS=Homo sapiens OX=9606 GN=CAMK2D PE=1 SV=3
199	288	tr|E9PBG7|E9PBG7_HUMAN	159.18	15	15	280000	7	1	10	Carbamidomethylation	57763	Calcium/calmodulin-dependent protein kinase type II subunit delta OS=Homo sapiens OX=9606 GN=CAMK2D PE=1 SV=1
199	289	tr|E9PF82|E9PF82_HUMAN	159.18	14	14	280000	7	1	10	Carbamidomethylation	60005	Calcium/calmodulin-dependent protein kinase type II subunit delta OS=Homo sapiens OX=9606 GN=CAMK2D PE=1 SV=1
156	526	P0CG39|POTEJ_HUMAN	154.3	7	7	0	7	1	10	Carbamidomethylation; Deamidation N	117390	POTE ankyrin domain family member J OS=Homo sapiens OX=9606 GN=POTEJ PE=3 SV=1
251	667	O00241|SIRB1_HUMAN	147.62	12	12	0	5	1	8	Carbamidomethylation	43211	Signal-regulatory protein beta-1 OS=Homo sapiens OX=9606 GN=SIRPB1 PE=1 SV=5
429	597	Q9H0U4|RAB1B_HUMAN	146.96	26	26	3140000	4	1	5		22171	Ras-related protein Rab-1B OS=Homo sapiens OX=9606 GN=RAB1B PE=1 SV=1
429	596	Q92928|RAB1C_HUMAN	146.96	26	26	3140000	4	1	5		22017	Putative Ras-related protein Rab-1C OS=Homo sapiens OX=9606 GN=RAB1C PE=5 SV=2
602	841	Q9UMX0|UBQL1_HUMAN	137.93	7	7	2840000	3	1	3		62519	Ubiquilin-1 OS=Homo sapiens OX=9606 GN=UBQLN1 PE=1 SV=2
334	746	P61601|NCALD_HUMAN	125.44	17	17	0	4	1	5	Carbamidomethylation	22245	Neurocalcin-delta OS=Homo sapiens OX=9606 GN=NCALD PE=1 SV=2
279	402	P35609|ACTN2_HUMAN	124.74	5	5	618000	5	1	5		103854	Alpha-actinin-2 OS=Homo sapiens OX=9606 GN=ACTN2 PE=1 SV=1
434	694	Q9P121|NTRI_HUMAN	123.79	12	12	6490000	4	1	5		37971	Neurotrimin OS=Homo sapiens OX=9606 GN=NTM PE=1 SV=1
369	717	Q05639|EF1A2_HUMAN	109.43	13	13	0	5	1	5	Deamidation N	50470	Elongation factor 1-alpha 2 OS=Homo sapiens OX=9606 GN=EEF1A2 PE=1 SV=1
293	741	P13647|K2C5_HUMAN	108.89	7	7	526000	5	1	8		62378	Keratin type II cytoskeletal 5 OS=Homo sapiens OX=9606 GN=KRT5 PE=1 SV=3
631	1104	P11216|PYGB_HUMAN	106.67	4	4	892000	2	1	2		96696	Glycogen phosphorylase brain form OS=Homo sapiens OX=9606 GN=PYGB PE=1 SV=5
652	1293	P19652|A1AG2_HUMAN	102.82	9	9	3390000	2	1	2		23603	Alpha-1-acid glycoprotein 2 OS=Homo sapiens OX=9606 GN=ORM2 PE=1 SV=2
441	946	Q58FG0|HS905_HUMAN	98.87	17	17	0	4	1	4	Carbamidomethylation; Ubiquitination-K	38738	Putative heat shock protein HSP 90-alpha A5 OS=Homo sapiens OX=9606 GN=HSP90AA5P PE=2 SV=1
608	887	Q9P0J0|NDUAD_HUMAN	97.63	24	24	3920000	3	1	3		16698	NADH dehydrogenase [ubiquinone] 1 alpha subcomplex subunit 13 OS=Homo sapiens OX=9606 GN=NDUFA13 PE=1 SV=3
828	1328	tr|C9JRD2|C9JRD2_HUMAN	94.94	11	11	1110000	2	1	2		25411	DnaJ homolog subfamily B member 2 (Fragment) OS=Homo sapiens OX=9606 GN=DNAJB2 PE=1 SV=1
828	1329	tr|C9JXB9|C9JXB9_HUMAN	94.94	10	10	1110000	2	1	2		26884	DnaJ homolog subfamily B member 2 (Fragment) OS=Homo sapiens OX=9606 GN=DNAJB2 PE=1 SV=1
828	1335	P25686|DNJB2_HUMAN	94.94	8	8	1110000	2	1	2		35580	DnaJ homolog subfamily B member 2 OS=Homo sapiens OX=9606 GN=DNAJB2 PE=1 SV=3
446	805	tr|D6RGI3|D6RGI3_HUMAN	91.16	6	6	316000	3	1	4		49006	Septin 11 isoform CRA_b OS=Homo sapiens OX=9606 GN=SEPT11 PE=1 SV=1
446	806	Q9NVA2|SEP11_HUMAN	91.16	6	6	316000	3	1	4		49398	Septin-11 OS=Homo sapiens OX=9606 GN=SEPT11 PE=1 SV=3
446	807	tr|D6RER5|D6RER5_HUMAN	91.16	6	6	316000	3	1	4		49809	Septin-11 OS=Homo sapiens OX=9606 GN=SEPT11 PE=1 SV=1
524	1103	P00338|LDHA_HUMAN	90.62	6	6	1390000	2	1	3	Carbamidomethylation	36689	L-lactate dehydrogenase A chain OS=Homo sapiens OX=9606 GN=LDHA PE=1 SV=2
1357	1792	Q9UI09|NDUAC_HUMAN	90.05	12	12	4360000	1	1	1		17114	NADH dehydrogenase [ubiquinone] 1 alpha subcomplex subunit 12 OS=Homo sapiens OX=9606 GN=NDUFA12 PE=1 SV=1
456	1055	Q9H492|MLP3A_HUMAN	88.63	23	23	4370000	3	1	5		14272	Microtubule-associated proteins 1A/1B light chain 3A OS=Homo sapiens OX=9606 GN=MAP1LC3A PE=1 SV=2
394	1035	tr|C9J0D1|C9J0D1_HUMAN	87.41	22	22	1040000	4	1	6		13163	Histone H2A OS=Homo sapiens OX=9606 GN=H2AFV PE=1 SV=1
394	1037	Q71UI9|H2AV_HUMAN	87.41	21	21	1040000	4	1	6		13509	Histone H2A.V OS=Homo sapiens OX=9606 GN=H2AFV PE=1 SV=3
394	1036	P0C0S5|H2AZ_HUMAN	87.41	21	21	1040000	4	1	6		13553	Histone H2A.Z OS=Homo sapiens OX=9606 GN=H2AFZ PE=1 SV=2
459	1358	P12036|NFH_HUMAN	86.31	2	2	652000	2	1	3		112479	Neurofilament heavy polypeptide OS=Homo sapiens OX=9606 GN=NEFH PE=1 SV=4
831	1333	P61956|SUMO2_HUMAN	85.75	23	23	1390000	2	1	2		10871	Small ubiquitin-related modifier 2 OS=Homo sapiens OX=9606 GN=SUMO2 PE=1 SV=3
618	972	P26038|MOES_HUMAN	85.56	5	5	2530000	3	1	3		67820	Moesin OS=Homo sapiens OX=9606 GN=MSN PE=1 SV=3
918	1803	O43761|SNG3_HUMAN	84.51	7	7	4030000	1	1	2		24555	Synaptogyrin-3 OS=Homo sapiens OX=9606 GN=SYNGR3 PE=1 SV=2
536	1915	P63167|DYL1_HUMAN	84.33	37	37	0	2	1	4	Carbamidomethylation; Deamidation N	10366	Dynein light chain 1 cytoplasmic OS=Homo sapiens OX=9606 GN=DYNLL1 PE=1 SV=1
537	1914	Q96FJ2|DYL2_HUMAN	83.97	37	37	0	2	1	4	Carbamidomethylation; Deamidation N	10350	Dynein light chain 2 cytoplasmic OS=Homo sapiens OX=9606 GN=DYNLL2 PE=1 SV=1
501	776	Q9UHD8|SEPT9_HUMAN	80.79	5	5	0	3	1	3		65402	Septin-9 OS=Homo sapiens OX=9606 GN=SEPT9 PE=1 SV=2
395	1054	tr|H3BTL1|H3BTL1_HUMAN	80.44	37	37	18600000	3	1	6	Deamidation N	9012	Microtubule-associated protein 1 light chain 3 beta isoform CRA_f OS=Homo sapiens OX=9606 GN=MAP1LC3B PE=3 SV=1
395	1057	A6NCE7|MP3B2_HUMAN	80.44	22	22	18600000	3	1	6	Deamidation N	14628	Microtubule-associated proteins 1A/1B light chain 3 beta 2 OS=Homo sapiens OX=9606 GN=MAP1LC3B2 PE=2 SV=1
395	1056	Q9GZQ8|MLP3B_HUMAN	80.44	22	22	18600000	3	1	6	Deamidation N	14688	Microtubule-associated proteins 1A/1B light chain 3B OS=Homo sapiens OX=9606 GN=MAP1LC3B PE=1 SV=3
888	1681	Q16620|NTRK2_HUMAN	76.85	2	2	1840000	1	1	1	Carbamidomethylation	91999	BDNF/NT-3 growth factors receptor OS=Homo sapiens OX=9606 GN=NTRK2 PE=1 SV=1
510	978	tr|A0A087X142|A0A087X142_HUMAN	76.16	8	8	446000	3	1	4		49356	Septin-8 OS=Homo sapiens OX=9606 GN=SEPT8 PE=1 SV=1
510	979	tr|A6NMH6|A6NMH6_HUMAN	76.16	7	7	446000	3	1	4		49916	Septin-8 OS=Homo sapiens OX=9606 GN=SEPT8 PE=1 SV=1
510	980	tr|A6NFQ9|A6NFQ9_HUMAN	76.16	7	7	446000	3	1	4		50928	Septin-8 OS=Homo sapiens OX=9606 GN=SEPT8 PE=1 SV=1
510	983	tr|F8W8I8|F8W8I8_HUMAN	76.16	7	7	446000	3	1	4		53163	Septin-8 OS=Homo sapiens OX=9606 GN=SEPT8 PE=1 SV=1
510	985	Q92599|SEPT8_HUMAN	76.16	7	7	446000	3	1	4		55756	Septin-8 OS=Homo sapiens OX=9606 GN=SEPT8 PE=1 SV=4
838	1372	P61106|RAB14_HUMAN	75.92	9	9	806000	2	1	2		23897	Ras-related protein Rab-14 OS=Homo sapiens OX=9606 GN=RAB14 PE=1 SV=4
544	1850	P04732|MT1E_HUMAN	75.34	20	20	7760000	1	1	4	Carbamidomethylation	6014	Metallothionein-1E OS=Homo sapiens OX=9606 GN=MT1E PE=1 SV=1
544	1849	P02795|MT2_HUMAN	75.34	20	20	7760000	1	1	4	Carbamidomethylation	6042	Metallothionein-2 OS=Homo sapiens OX=9606 GN=MT2A PE=1 SV=1
544	1848	P80297|MT1X_HUMAN	75.34	20	20	7760000	1	1	4	Carbamidomethylation	6068	Metallothionein-1X OS=Homo sapiens OX=9606 GN=MT1X PE=1 SV=1
544	1847	Q8N339|MT1M_HUMAN	75.34	20	20	7760000	1	1	4	Carbamidomethylation	6110	Metallothionein-1M OS=Homo sapiens OX=9606 GN=MT1M PE=3 SV=2
544	1851	P13640|MT1G_HUMAN	75.34	19	19	7760000	1	1	4	Carbamidomethylation	6141	Metallothionein-1G OS=Homo sapiens OX=9606 GN=MT1G PE=1 SV=2
1358	1830	tr|H3BV16|H3BV16_HUMAN	74.53	10	10	1880000	1	1	1		17385	NADH dehydrogenase [ubiquinone] 1 beta subcomplex subunit 10 (Fragment) OS=Homo sapiens OX=9606 GN=NDUFB10 PE=1 SV=8
1358	1831	tr|H3BPJ9|H3BPJ9_HUMAN	74.53	9	9	1880000	1	1	1		19258	NADH dehydrogenase [ubiquinone] 1 beta subcomplex subunit 10 OS=Homo sapiens OX=9606 GN=NDUFB10 PE=1 SV=1
1358	1832	O96000|NDUBA_HUMAN	74.53	8	8	1880000	1	1	1		20777	NADH dehydrogenase [ubiquinone] 1 beta subcomplex subunit 10 OS=Homo sapiens OX=9606 GN=NDUFB10 PE=1 SV=3
853	1480	tr|H3BMN5|H3BMN5_HUMAN	72.63	12	12	896000	2	1	2		18475	Calretinin (Fragment) OS=Homo sapiens OX=9606 GN=CALB2 PE=1 SV=2
853	1148	tr|H3BN14|H3BN14_HUMAN	72.63	8	8	896000	2	1	2		27325	Calretinin (Fragment) OS=Homo sapiens OX=9606 GN=CALB2 PE=1 SV=2
853	1150	P22676|CALB2_HUMAN	72.63	7	7	896000	2	1	2		31540	Calretinin OS=Homo sapiens OX=9606 GN=CALB2 PE=2 SV=2
872	1574	tr|H7C5J5|H7C5J5_HUMAN	72.06	14	14	324000	2	1	2	Carbamidomethylation	17986	Guanine nucleotide-binding protein subunit beta-4 (Fragment) OS=Homo sapiens OX=9606 GN=GNB4 PE=1 SV=1
872	1575	Q9HAV0|GBB4_HUMAN	72.06	7	7	324000	2	1	2	Carbamidomethylation	37567	Guanine nucleotide-binding protein subunit beta-4 OS=Homo sapiens OX=9606 GN=GNB4 PE=1 SV=3
1359	1868	tr|F8WCJ1|F8WCJ1_HUMAN	71.11	11	11	2020000	1	1	1		11688	Eukaryotic translation initiation factor 5A OS=Homo sapiens OX=9606 GN=EIF5A2 PE=1 SV=1
1359	1870	tr|C9J7B5|C9J7B5_HUMAN	71.11	11	11	2020000	1	1	1		11945	Eukaryotic translation initiation factor 5A OS=Homo sapiens OX=9606 GN=EIF5A2 PE=1 SV=1
1359	1871	tr|C9J4W5|C9J4W5_HUMAN	71.11	10	10	2020000	1	1	1		12821	Eukaryotic translation initiation factor 5A (Fragment) OS=Homo sapiens OX=9606 GN=EIF5A2 PE=1 SV=1
1359	1873	tr|I3L397|I3L397_HUMAN	71.11	8	8	2020000	1	1	1		16019	Eukaryotic translation initiation factor 5A (Fragment) OS=Homo sapiens OX=9606 GN=EIF5A PE=1 SV=8
1359	1876	Q9GZV4|IF5A2_HUMAN	71.11	8	8	2020000	1	1	1		16793	Eukaryotic translation initiation factor 5A-2 OS=Homo sapiens OX=9606 GN=EIF5A2 PE=1 SV=3
1359	1878	Q6IS14|IF5AL_HUMAN	71.11	8	8	2020000	1	1	1		16773	Eukaryotic translation initiation factor 5A-1-like OS=Homo sapiens OX=9606 GN=EIF5AL1 PE=2 SV=2
1359	1877	P63241|IF5A1_HUMAN	71.11	8	8	2020000	1	1	1		16832	Eukaryotic translation initiation factor 5A-1 OS=Homo sapiens OX=9606 GN=EIF5A PE=1 SV=2
1359	1889	tr|I3L504|I3L504_HUMAN	71.11	6	6	2020000	1	1	1		20504	Eukaryotic translation initiation factor 5A-1 OS=Homo sapiens OX=9606 GN=EIF5A PE=1 SV=1
667	1639	Q9BPW8|NIPS1_HUMAN	69.41	5	5	454000	1	1	1		33310	Protein NipSnap homolog 1 OS=Homo sapiens OX=9606 GN=NIPSNAP1 PE=1 SV=1
865	1535	Q9NRW1|RAB6B_HUMAN	69.39	12	12	698000	2	1	2		23462	Ras-related protein Rab-6B OS=Homo sapiens OX=9606 GN=RAB6B PE=1 SV=1
1369	1950	tr|E5RIF1|E5RIF1_HUMAN	69.17	19	19	1210000	1	1	1		5890	Ubiquitin-conjugating enzyme E2 variant 2 (Fragment) OS=Homo sapiens OX=9606 GN=UBE2V2 PE=4 SV=1
1369	1981	tr|D6RG00|D6RG00_HUMAN	69.17	11	11	1210000	1	1	1		10171	HCG2018358 isoform CRA_d OS=Homo sapiens OX=9606 GN=UBE2V1 PE=4 SV=2
1369	1997	tr|G3V2F7|G3V2F7_HUMAN	69.17	10	10	1210000	1	1	1		12019	Ubiquitin-conjugating enzyme E2 variant 1 OS=Homo sapiens OX=9606 GN=UBE2V1 PE=3 SV=2
1369	1996	tr|G3V113|G3V113_HUMAN	69.17	10	10	1210000	1	1	1		12017	Ubiquitin-conjugating enzyme E2 variant 2 OS=Homo sapiens OX=9606 GN=UBE2V2 PE=1 SV=1
1369	2009	Q15819|UB2V2_HUMAN	69.17	7	7	1210000	1	1	1		16363	Ubiquitin-conjugating enzyme E2 variant 2 OS=Homo sapiens OX=9606 GN=UBE2V2 PE=1 SV=4
1369	2010	Q13404|UB2V1_HUMAN	69.17	7	7	1210000	1	1	1		16495	Ubiquitin-conjugating enzyme E2 variant 1 OS=Homo sapiens OX=9606 GN=UBE2V1 PE=1 SV=2
1369	2015	tr|H0YBX6|H0YBX6_HUMAN	69.17	6	6	1210000	1	1	1		16879	Ubiquitin-conjugating enzyme E2 variant 2 (Fragment) OS=Homo sapiens OX=9606 GN=UBE2V2 PE=1 SV=1
1369	2101	tr|I3L0A0|I3L0A0_HUMAN	69.17	3	3	1210000	1	1	1		42209	HCG2044781 OS=Homo sapiens OX=9606 GN=TMEM189-UBE2V1 PE=3 SV=1
910	1755	tr|C9J592|C9J592_HUMAN	68.47	11	11	1900000	1	1	1		17038	Ras-related protein Rab-7a (Fragment) OS=Homo sapiens OX=9606 GN=RAB7A PE=1 SV=1
910	1756	P51149|RAB7A_HUMAN	68.47	8	8	1900000	1	1	1		23490	Ras-related protein Rab-7a OS=Homo sapiens OX=9606 GN=RAB7A PE=1 SV=1
1360	1880	Q8IWA5|CTL2_HUMAN	67.85	2	2	1180000	1	1	1		80124	Choline transporter-like protein 2 OS=Homo sapiens OX=9606 GN=SLC44A2 PE=1 SV=3
892	1694	B9A064|IGLL5_HUMAN	67.42	7	7	2810000	1	1	1	Carbamidomethylation	23063	Immunoglobulin lambda-like polypeptide 5 OS=Homo sapiens OX=9606 GN=IGLL5 PE=2 SV=2
892	1695	tr|A0A0B4J231|A0A0B4J231_HUMAN	67.42	7	7	2810000	1	1	1	Carbamidomethylation	23150	Immunoglobulin lambda-like polypeptide 5 OS=Homo sapiens OX=9606 GN=IGLL5 PE=1 SV=1
915	1711	P51148|RAB5C_HUMAN	67.08	6	6	1200000	1	1	1		23483	Ras-related protein Rab-5C OS=Homo sapiens OX=9606 GN=RAB5C PE=1 SV=2
1361	1899	tr|H0Y922|H0Y922_HUMAN	66.85	8	8	2800000	1	1	1	Carbamidomethylation	18874	MICOS complex subunit (Fragment) OS=Homo sapiens OX=9606 GN=CHCHD6 PE=1 SV=1
1361	1900	Q9BRQ6|MIC25_HUMAN	66.85	6	6	2800000	1	1	1	Carbamidomethylation	26458	MICOS complex subunit MIC25 OS=Homo sapiens OX=9606 GN=CHCHD6 PE=1 SV=1
1361	1901	tr|J3QTA6|J3QTA6_HUMAN	66.85	5	5	2800000	1	1	1	Carbamidomethylation	28817	MICOS complex subunit OS=Homo sapiens OX=9606 GN=CHCHD6 PE=1 SV=1
1366	1938	Q9UIK5|TEFF2_HUMAN	66.49	3	3	576000	1	1	1	Carbamidomethylation	41428	Tomoregulin-2 OS=Homo sapiens OX=9606 GN=TMEFF2 PE=1 SV=1
1364	1929	tr|H0YDX6|H0YDX6_HUMAN	66.28	7	7	2620000	1	1	1		19579	CD44 antigen (Fragment) OS=Homo sapiens OX=9606 GN=CD44 PE=1 SV=1
1364	1930	tr|H0YD13|H0YD13_HUMAN	66.28	6	6	2620000	1	1	1		22683	CD44 antigen OS=Homo sapiens OX=9606 GN=CD44 PE=1 SV=2
1364	1933	tr|H0YD17|H0YD17_HUMAN	66.28	5	5	2620000	1	1	1		25677	CD44 antigen (Fragment) OS=Homo sapiens OX=9606 GN=CD44 PE=1 SV=8
1364	1934	tr|H0YDW7|H0YDW7_HUMAN	66.28	5	5	2620000	1	1	1		26021	CD44 antigen (Fragment) OS=Homo sapiens OX=9606 GN=CD44 PE=1 SV=1
1364	1937	tr|H0YCV9|H0YCV9_HUMAN	66.28	5	5	2620000	1	1	1		27326	CD44 antigen (Fragment) OS=Homo sapiens OX=9606 GN=CD44 PE=1 SV=1
1364	1939	tr|H0Y2P0|H0Y2P0_HUMAN	66.28	4	4	2620000	1	1	1		30952	CD44 antigen (Fragment) OS=Homo sapiens OX=9606 GN=CD44 PE=1 SV=1
1364	1942	tr|H0Y5E4|H0Y5E4_HUMAN	66.28	4	4	2620000	1	1	1		32062	CD44 antigen (Fragment) OS=Homo sapiens OX=9606 GN=CD44 PE=1 SV=1
1364	1951	P16070|CD44_HUMAN	66.28	2	2	2620000	1	1	1		81538	CD44 antigen OS=Homo sapiens OX=9606 GN=CD44 PE=1 SV=3
1362	1923	P06702|S10A9_HUMAN	65.55	13	13	3690000	1	1	1		13242	Protein S100-A9 OS=Homo sapiens OX=9606 GN=S100A9 PE=1 SV=1
1363	1925	Q9BRX8|F213A_HUMAN	65.48	7	7	270000	1	1	1		25764	Redox-regulatory protein FAM213A OS=Homo sapiens OX=9606 GN=FAM213A PE=1 SV=3
1365	1935	tr|F8VP47|F8VP47_HUMAN	64.49	3	3	299000	1	1	1		71144	Rabphilin-3A OS=Homo sapiens OX=9606 GN=RPH3A PE=1 SV=1
1365	1936	Q9Y2J0|RP3A_HUMAN	64.49	3	3	299000	1	1	1		76872	Rabphilin-3A OS=Homo sapiens OX=9606 GN=RPH3A PE=1 SV=1
1367	1941	Q8TB36|GDAP1_HUMAN	64.05	4	4	475000	1	1	1		41346	Ganglioside-induced differentiation-associated protein 1 OS=Homo sapiens OX=9606 GN=GDAP1 PE=1 SV=3
866	1554	tr|A0A140T971|A0A140T971_HUMAN	62.97	7	7	10400000	2	1	2	Carbamidomethylation	23512	N(G) N(G)-dimethylarginine dimethylaminohydrolase 2 (Fragment) OS=Homo sapiens OX=9606 GN=DDAH2 PE=1 SV=1
866	1555	tr|Q5SSV3|Q5SSV3_HUMAN	62.97	7	7	10400000	2	1	2	Carbamidomethylation	23569	N(G) N(G)-dimethylarginine dimethylaminohydrolase 2 (Fragment) OS=Homo sapiens OX=9606 GN=DDAH2 PE=1 SV=1
866	1556	tr|Q5SRR8|Q5SRR8_HUMAN	62.97	6	6	10400000	2	1	2	Carbamidomethylation	24640	N(G) N(G)-dimethylarginine dimethylaminohydrolase 2 (Fragment) OS=Homo sapiens OX=9606 GN=DDAH2 PE=1 SV=2
866	1557	O95865|DDAH2_HUMAN	62.97	5	5	10400000	2	1	2	Carbamidomethylation	29644	N(G) N(G)-dimethylarginine dimethylaminohydrolase 2 OS=Homo sapiens OX=9606 GN=DDAH2 PE=1 SV=1
1368	1949	Q9H444|CHM4B_HUMAN	62.87	6	6	511000	1	1	1		24950	Charged multivesicular body protein 4b OS=Homo sapiens OX=9606 GN=CHMP4B PE=1 SV=1
1370	1952	tr|F6V107|F6V107_HUMAN	62.8	5	5	150000	1	1	1		25092	PRKCA-binding protein (Fragment) OS=Homo sapiens OX=9606 GN=PICK1 PE=1 SV=1
1370	1971	Q9NRD5|PICK1_HUMAN	62.8	3	3	150000	1	1	1		46600	PRKCA-binding protein OS=Homo sapiens OX=9606 GN=PICK1 PE=1 SV=2
919	2049	tr|A6NNI4|A6NNI4_HUMAN	62.29	6	6	17900000	1	1	2		17764	Tetraspanin OS=Homo sapiens OX=9606 GN=CD9 PE=1 SV=1
919	2076	P21926|CD9_HUMAN	62.29	4	4	17900000	1	1	2		25416	CD9 antigen OS=Homo sapiens OX=9606 GN=CD9 PE=1 SV=4
919	2075	tr|G8JLH6|G8JLH6_HUMAN	62.29	4	4	17900000	1	1	2		25408	Tetraspanin (Fragment) OS=Homo sapiens OX=9606 GN=CD9 PE=1 SV=1
1371	1964	tr|A0A087X215|A0A087X215_HUMAN	61.58	27	27	13000000	1	1	1		5509	Basigin OS=Homo sapiens OX=9606 GN=BSG PE=1 SV=1
862	1522	tr|F8W031|F8W031_HUMAN	60.94	7	7	1480000	2	1	2		29224	Uncharacterized protein (Fragment) OS=Homo sapiens OX=9606 PE=1 SV=1
1377	2003	tr|K7ESE8|K7ESE8_HUMAN	60.64	5	5	1350000	1	1	1		26739	Bleomycin hydrolase (Fragment) OS=Homo sapiens OX=9606 GN=BLMH PE=1 SV=1
1377	2005	tr|J3KSD8|J3KSD8_HUMAN	60.64	4	4	1350000	1	1	1		30264	Bleomycin hydrolase (Fragment) OS=Homo sapiens OX=9606 GN=BLMH PE=1 SV=8
1377	2007	tr|K7ES02|K7ES02_HUMAN	60.64	3	3	1350000	1	1	1		37198	Bleomycin hydrolase (Fragment) OS=Homo sapiens OX=9606 GN=BLMH PE=1 SV=1
1377	2023	Q13867|BLMH_HUMAN	60.64	2	2	1350000	1	1	1		52562	Bleomycin hydrolase OS=Homo sapiens OX=9606 GN=BLMH PE=1 SV=1
1373	1977	tr|A0A087X208|A0A087X208_HUMAN	60.39	1	1	0	1	1	1	Carbamidomethylation	202292	Agrin OS=Homo sapiens OX=9606 GN=AGRN PE=1 SV=1
1373	1978	O00468|AGRIN_HUMAN	60.39	1	1	0	1	1	1	Carbamidomethylation	217231	Agrin OS=Homo sapiens OX=9606 GN=AGRN PE=1 SV=5
1372	1976	P04733|MT1F_HUMAN	60.25	20	20	263000	1	1	1	Carbamidomethylation	6086	Metallothionein-1F OS=Homo sapiens OX=9606 GN=MT1F PE=1 SV=1
1374	1983	tr|Q5R3B4|Q5R3B4_HUMAN	60	11	11	1950000	1	1	1		11681	Mitochondrial pyruvate carrier (Fragment) OS=Homo sapiens OX=9606 GN=MPC2 PE=1 SV=1
1374	1990	O95563|MPC2_HUMAN	60	9	9	1950000	1	1	1		14279	Mitochondrial pyruvate carrier 2 OS=Homo sapiens OX=9606 GN=MPC2 PE=1 SV=1
672	1998	P50991|TCPD_HUMAN	59.41	2	2	478000	1	1	1		57924	T-complex protein 1 subunit delta OS=Homo sapiens OX=9606 GN=CCT4 PE=1 SV=4
1376	2002	O60220|TIM8A_HUMAN	59.41	11	11	2060000	1	1	1	Carbamidomethylation	10998	Mitochondrial import inner membrane translocase subunit Tim8 A OS=Homo sapiens OX=9606 GN=TIMM8A PE=1 SV=1
1375	1991	tr|B4DV51|B4DV51_HUMAN	59.03	10	10	486000	1	1	1	Carbamidomethylation	14731	GTP-binding nuclear protein Ran OS=Homo sapiens OX=9606 GN=RAN PE=1 SV=1
1375	1992	tr|F5H018|F5H018_HUMAN	59.03	7	7	486000	1	1	1	Carbamidomethylation	22436	GTP-binding nuclear protein Ran (Fragment) OS=Homo sapiens OX=9606 GN=RAN PE=1 SV=8
1375	1993	P62826|RAN_HUMAN	59.03	6	6	486000	1	1	1	Carbamidomethylation	24423	GTP-binding nuclear protein Ran OS=Homo sapiens OX=9606 GN=RAN PE=1 SV=3
1375	1994	tr|B5MDF5|B5MDF5_HUMAN	59.03	6	6	486000	1	1	1	Carbamidomethylation	26224	GTP-binding nuclear protein Ran OS=Homo sapiens OX=9606 GN=RAN PE=1 SV=1
1375	1995	tr|J3KQE5|J3KQE5_HUMAN	59.03	6	6	486000	1	1	1	Carbamidomethylation	26816	GTP-binding nuclear protein Ran (Fragment) OS=Homo sapiens OX=9606 GN=RAN PE=1 SV=1
1378	2016	P53999|TCP4_HUMAN	58.61	10	10	480000	1	1	1		14395	Activated RNA polymerase II transcriptional coactivator p15 OS=Homo sapiens OX=9606 GN=SUB1 PE=1 SV=3
1379	2017	tr|H7BY36|H7BY36_HUMAN	58.52	5	5	182000	1	1	1		32190	RNA-binding protein EWS (Fragment) OS=Homo sapiens OX=9606 GN=EWSR1 PE=1 SV=1
1379	2018	tr|A0A0D9SFL3|A0A0D9SFL3_HUMAN	58.52	2	2	182000	1	1	1		61415	RNA-binding protein EWS OS=Homo sapiens OX=9606 GN=EWSR1 PE=1 SV=1
1379	2019	tr|B0QYK0|B0QYK0_HUMAN	58.52	2	2	182000	1	1	1		64929	RNA-binding protein EWS OS=Homo sapiens OX=9606 GN=EWSR1 PE=1 SV=1
1379	2020	tr|C9JGE3|C9JGE3_HUMAN	58.52	2	2	182000	1	1	1		65135	EWS RNA-binding protein variant 6 OS=Homo sapiens OX=9606 GN=EWSR1 PE=1 SV=2
1379	2021	Q01844|EWS_HUMAN	58.52	2	2	182000	1	1	1		68478	RNA-binding protein EWS OS=Homo sapiens OX=9606 GN=EWSR1 PE=1 SV=1
913	2073	tr|Q5T123|Q5T123_HUMAN	57.72	11	11	9040000	1	1	1		9381	SH3 domain-binding glutamic acid-rich-like protein 3 OS=Homo sapiens OX=9606 GN=SH3BGRL3 PE=1 SV=1
913	2074	Q9H299|SH3L3_HUMAN	57.72	11	11	9040000	1	1	1		10438	SH3 domain-binding glutamic acid-rich-like protein 3 OS=Homo sapiens OX=9606 GN=SH3BGRL3 PE=1 SV=1
908	1752	P22314|UBA1_HUMAN	57.58	1	1	2210000	1	1	1		117849	Ubiquitin-like modifier-activating enzyme 1 OS=Homo sapiens OX=9606 GN=UBA1 PE=1 SV=3
920	2185	Q16864|VATF_HUMAN	57.27	8	8	3700000	1	1	2		13370	V-type proton ATPase subunit F OS=Homo sapiens OX=9606 GN=ATP6V1F PE=1 SV=2
1380	2028	Q9UJC5|SH3L2_HUMAN	56.99	13	13	1090000	1	1	1		12326	SH3 domain-binding glutamic acid-rich-like protein 2 OS=Homo sapiens OX=9606 GN=SH3BGRL2 PE=1 SV=2
879	1601	tr|Q5T0R1|Q5T0R1_HUMAN	56.97	6	6	2080000	1	1	1		23930	Adenylyl cyclase-associated protein 1 (Fragment) OS=Homo sapiens OX=9606 GN=CAP1 PE=1 SV=1
879	1602	tr|Q5T0R9|Q5T0R9_HUMAN	56.97	5	5	2080000	1	1	1		28635	Adenylyl cyclase-associated protein 1 (Fragment) OS=Homo sapiens OX=9606 GN=CAP1 PE=1 SV=8
879	1603	Q01518|CAP1_HUMAN	56.97	3	3	2080000	1	1	1		51902	Adenylyl cyclase-associated protein 1 OS=Homo sapiens OX=9606 GN=CAP1 PE=1 SV=5
1381	2046	tr|A0A087WUT8|A0A087WUT8_HUMAN	56.72	3	3	3040000	1	1	1		50190	Chondroitin sulfate proteoglycan 5 OS=Homo sapiens OX=9606 GN=CSPG5 PE=1 SV=1
1381	2047	O95196|CSPG5_HUMAN	56.72	2	2	3040000	1	1	1		60016	Chondroitin sulfate proteoglycan 5 OS=Homo sapiens OX=9606 GN=CSPG5 PE=1 SV=3
1383	2090	tr|B0QYY6|B0QYY6_HUMAN	56.52	8	8	909000	1	1	1		13995	RNA-binding protein fox-1 homolog 2 (Fragment) OS=Homo sapiens OX=9606 GN=RBFOX2 PE=1 SV=1
1383	1723	tr|A0A0G2JSB3|A0A0G2JSB3_HUMAN	56.52	5	5	909000	1	1	1		20252	RNA-binding protein fox-1 homolog 2 (Fragment) OS=Homo sapiens OX=9606 GN=RBFOX2 PE=1 SV=1
1383	1724	tr|I3L1D4|I3L1D4_HUMAN	56.52	5	5	909000	1	1	1		20661	RNA-binding protein fox-1 homolog 1 (Fragment) OS=Homo sapiens OX=9606 GN=RBFOX1 PE=4 SV=1
1383	1725	tr|B0QYY7|B0QYY7_HUMAN	56.52	5	5	909000	1	1	1		21831	RNA-binding protein fox-1 homolog 2 (Fragment) OS=Homo sapiens OX=9606 GN=RBFOX2 PE=1 SV=1
1383	1726	tr|S4R469|S4R469_HUMAN	56.52	4	4	909000	1	1	1		25265	RNA-binding protein fox-1 homolog 2 (Fragment) OS=Homo sapiens OX=9606 GN=RBFOX2 PE=1 SV=1
1383	1727	tr|F8VR27|F8VR27_HUMAN	56.52	4	4	909000	1	1	1		28437	RNA-binding protein fox-1 homolog 1 (Fragment) OS=Homo sapiens OX=9606 GN=RBFOX1 PE=4 SV=1
1383	1728	tr|F8VZY7|F8VZY7_HUMAN	56.52	4	4	909000	1	1	1		28566	RNA-binding protein fox-1 homolog 1 (Fragment) OS=Homo sapiens OX=9606 GN=RBFOX1 PE=4 SV=1
1383	2148	A6NFN3|RFOX3_HUMAN	56.52	3	3	909000	1	1	1		33873	RNA binding protein fox-1 homolog 3 OS=Homo sapiens OX=9606 GN=RBFOX3 PE=2 SV=4
1383	2153	tr|J3QQZ2|J3QQZ2_HUMAN	56.52	3	3	909000	1	1	1		35443	RNA binding protein fox-1 homolog OS=Homo sapiens OX=9606 GN=RBFOX3 PE=1 SV=1
1383	1729	tr|B0QYV1|B0QYV1_HUMAN	56.52	3	3	909000	1	1	1		37866	RNA binding protein fox-1 homolog OS=Homo sapiens OX=9606 GN=RBFOX2 PE=1 SV=1
1383	2159	tr|J3QRF4|J3QRF4_HUMAN	56.52	3	3	909000	1	1	1		38727	RNA binding protein fox-1 homolog OS=Homo sapiens OX=9606 GN=RBFOX3 PE=1 SV=1
1383	1730	tr|B0QYY4|B0QYY4_HUMAN	56.52	3	3	909000	1	1	1		39940	RNA binding protein fox-1 homolog OS=Homo sapiens OX=9606 GN=RBFOX2 PE=1 SV=1
1383	1731	tr|A0A087X2B1|A0A087X2B1_HUMAN	56.52	3	3	909000	1	1	1		40310	RNA binding protein fox-1 homolog OS=Homo sapiens OX=9606 GN=RBFOX1 PE=1 SV=1
1383	1732	tr|A0A0G2JRA5|A0A0G2JRA5_HUMAN	56.52	3	3	909000	1	1	1		41243	RNA-binding protein fox-1 homolog 2 (Fragment) OS=Homo sapiens OX=9606 GN=RBFOX2 PE=1 SV=1
1383	1733	O43251|RFOX2_HUMAN	56.52	3	3	909000	1	1	1		41374	RNA binding protein fox-1 homolog 2 OS=Homo sapiens OX=9606 GN=RBFOX2 PE=1 SV=3
1383	1734	tr|F8VRS4|F8VRS4_HUMAN	56.52	3	3	909000	1	1	1		42264	RNA binding protein fox-1 homolog OS=Homo sapiens OX=9606 GN=RBFOX1 PE=4 SV=1
1383	1735	Q9NWB1|RFOX1_HUMAN	56.52	3	3	909000	1	1	1		42784	RNA binding protein fox-1 homolog 1 OS=Homo sapiens OX=9606 GN=RBFOX1 PE=1 SV=2
1383	1736	tr|J3KNW3|J3KNW3_HUMAN	56.52	2	2	909000	1	1	1		43089	RNA binding protein fox-1 homolog OS=Homo sapiens OX=9606 GN=RBFOX1 PE=1 SV=1
1383	1737	tr|B7Z1U7|B7Z1U7_HUMAN	56.52	2	2	909000	1	1	1		45950	RNA binding protein fox-1 homolog OS=Homo sapiens OX=9606 GN=RBFOX1 PE=1 SV=1
1383	1738	tr|F8VZG9|F8VZG9_HUMAN	56.52	2	2	909000	1	1	1		50561	RNA-binding protein fox-1 homolog 1 OS=Homo sapiens OX=9606 GN=RBFOX1 PE=4 SV=1
1383	1739	tr|A0A286YEU2|A0A286YEU2_HUMAN	56.52	2	2	909000	1	1	1		62713	RNA-binding protein fox-1 homolog 1 OS=Homo sapiens OX=9606 GN=RBFOX1 PE=4 SV=1
858	1508	tr|J3QLR2|J3QLR2_HUMAN	55.78	16	16	0	2	1	2	Carbamidomethylation	23217	Septin-4 (Fragment) OS=Homo sapiens OX=9606 GN=SEPT4 PE=1 SV=1
858	1509	tr|J3QRT6|J3QRT6_HUMAN	55.78	10	10	0	2	1	2	Carbamidomethylation	38430	Septin-4 OS=Homo sapiens OX=9606 GN=SEPT4 PE=1 SV=1
858	1510	tr|J3KSZ7|J3KSZ7_HUMAN	55.78	9	9	0	2	1	2	Carbamidomethylation	43952	Septin-4 OS=Homo sapiens OX=9606 GN=SEPT4 PE=1 SV=1
858	1511	O43236|SEPT4_HUMAN	55.78	7	7	0	2	1	2	Carbamidomethylation	55098	Septin-4 OS=Homo sapiens OX=9606 GN=SEPT4 PE=1 SV=1
1384	2106	tr|I3L0S5|I3L0S5_HUMAN	55.38	5	5	104000	1	1	1	Carbamidomethylation	22981	Lysosomal alpha-glucosidase (Fragment) OS=Homo sapiens OX=9606 GN=GAA PE=1 SV=1
1384	2150	tr|I3L3L3|I3L3L3_HUMAN	55.38	4	4	104000	1	1	1	Carbamidomethylation	31622	Lysosomal alpha-glucosidase (Fragment) OS=Homo sapiens OX=9606 GN=GAA PE=1 SV=8
1384	2244	P10253|LYAG_HUMAN	55.38	1	1	104000	1	1	1	Carbamidomethylation	105324	Lysosomal alpha-glucosidase OS=Homo sapiens OX=9606 GN=GAA PE=1 SV=4
1382	2070	tr|F8WDS9|F8WDS9_HUMAN	55.29	15	15	914000	1	1	1		9283	LanC-like protein 1 OS=Homo sapiens OX=9606 GN=LANCL1 PE=1 SV=1
1382	2071	tr|E9PHS0|E9PHS0_HUMAN	55.29	6	6	914000	1	1	1		22042	LanC-like protein 1 (Fragment) OS=Homo sapiens OX=9606 GN=LANCL1 PE=1 SV=1
1382	2072	O43813|LANC1_HUMAN	55.29	3	3	914000	1	1	1		45283	LanC-like protein 1 OS=Homo sapiens OX=9606 GN=LANCL1 PE=1 SV=1
674	2200	P14550|AK1A1_HUMAN	54.23	3	3	2060000	1	1	1		36573	Alcohol dehydrogenase [NADP(+)] OS=Homo sapiens OX=9606 GN=AKR1A1 PE=1 SV=3
1387	2129	tr|E7EQL1|E7EQL1_HUMAN	53.91	8	8	2990000	1	1	1		15298	Uncharacterized protein OS=Homo sapiens OX=9606 PE=4 SV=2
1387	2138	Q6P4F2|FDX2_HUMAN	53.91	6	6	2990000	1	1	1		19521	Ferredoxin-2 mitochondrial OS=Homo sapiens OX=9606 GN=FDX2 PE=1 SV=1
1401	2314	tr|F5GYK7|F5GYK7_HUMAN	53.9	2	2	846000	1	1	1		41513	Glycerol-3-phosphate dehydrogenase OS=Homo sapiens OX=9606 GN=GPD2 PE=1 SV=1
1401	2368	P43304|GPDM_HUMAN	53.9	1	1	846000	1	1	1		80853	Glycerol-3-phosphate dehydrogenase mitochondrial OS=Homo sapiens OX=9606 GN=GPD2 PE=1 SV=3
1385	2115	Q8TCZ2|C99L2_HUMAN	53.69	5	5	2460000	1	1	1		27986	CD99 antigen-like protein 2 OS=Homo sapiens OX=9606 GN=CD99L2 PE=1 SV=1
1388	2171	tr|H0YBG7|H0YBG7_HUMAN	53.55	5	5	1980000	1	1	1		19761	Heterogeneous nuclear ribonucleoprotein H (Fragment) OS=Homo sapiens OX=9606 GN=HNRNPH1 PE=1 SV=1
1388	2172	tr|H0YBD7|H0YBD7_HUMAN	53.55	5	5	1980000	1	1	1		21249	Heterogeneous nuclear ribonucleoprotein H (Fragment) OS=Homo sapiens OX=9606 GN=HNRNPH1 PE=1 SV=8
1388	2196	tr|H0YB39|H0YB39_HUMAN	53.55	4	4	1980000	1	1	1		30503	Heterogeneous nuclear ribonucleoprotein H (Fragment) OS=Homo sapiens OX=9606 GN=HNRNPH1 PE=1 SV=1
1388	2214	P52597|HNRPF_HUMAN	53.55	2	2	1980000	1	1	1		45672	Heterogeneous nuclear ribonucleoprotein F OS=Homo sapiens OX=9606 GN=HNRNPF PE=1 SV=3
1388	2216	tr|E9PCY7|E9PCY7_HUMAN	53.55	2	2	1980000	1	1	1		47087	Heterogeneous nuclear ribonucleoprotein H OS=Homo sapiens OX=9606 GN=HNRNPH1 PE=1 SV=1
1388	2218	P31943|HNRH1_HUMAN	53.55	2	2	1980000	1	1	1		49229	Heterogeneous nuclear ribonucleoprotein H OS=Homo sapiens OX=9606 GN=HNRNPH1 PE=1 SV=4
1388	2217	P55795|HNRH2_HUMAN	53.55	2	2	1980000	1	1	1		49264	Heterogeneous nuclear ribonucleoprotein H2 OS=Homo sapiens OX=9606 GN=HNRNPH2 PE=1 SV=1
1388	2220	tr|G8JLB6|G8JLB6_HUMAN	53.55	2	2	1980000	1	1	1		51230	Heterogeneous nuclear ribonucleoprotein H OS=Homo sapiens OX=9606 GN=HNRNPH1 PE=1 SV=1
1386	2122	tr|A0A087WTX8|A0A087WTX8_HUMAN	53.53	26	26	1580000	1	1	1		4767	Secretory carrier-associated membrane protein 1 (Fragment) OS=Homo sapiens OX=9606 GN=SCAMP1 PE=1 SV=1
1386	2140	tr|A0A087WZA6|A0A087WZA6_HUMAN	53.53	9	9	1580000	1	1	1		13322	Secretory carrier-associated membrane protein 1 (Fragment) OS=Homo sapiens OX=9606 GN=SCAMP1 PE=1 SV=1
1386	2151	tr|A0A087WXB0|A0A087WXB0_HUMAN	53.53	4	4	1580000	1	1	1		35046	Secretory carrier-associated membrane protein OS=Homo sapiens OX=9606 GN=SCAMP1 PE=1 SV=1
1386	2154	O15126|SCAM1_HUMAN	53.53	3	3	1580000	1	1	1		37920	Secretory carrier-associated membrane protein 1 OS=Homo sapiens OX=9606 GN=SCAMP1 PE=1 SV=2
1396	2284	Q9H061|T126A_HUMAN	52.16	5	5	365000	1	1	1		21527	Transmembrane protein 126A OS=Homo sapiens OX=9606 GN=TMEM126A PE=1 SV=1
664	1606	tr|Q5T7C4|Q5T7C4_HUMAN	52.13	9	9	1560000	1	1	1		18311	High mobility group protein B1 OS=Homo sapiens OX=9606 GN=HMGB1 PE=1 SV=1
664	1607	B2RPK0|HGB1A_HUMAN	52.13	7	7	1560000	1	1	1		24238	Putative high mobility group protein B1-like 1 OS=Homo sapiens OX=9606 GN=HMGB1P1 PE=5 SV=1
664	1608	P09429|HMGB1_HUMAN	52.13	7	7	1560000	1	1	1		24894	High mobility group protein B1 OS=Homo sapiens OX=9606 GN=HMGB1 PE=1 SV=3
1389	2187	tr|H0YLY7|H0YLY7_HUMAN	52.04	13	13	958000	1	1	1		10751	Calcineurin B homologous protein 1 (Fragment) OS=Homo sapiens OX=9606 GN=CHP1 PE=1 SV=1
1389	2191	tr|H0YKE7|H0YKE7_HUMAN	52.04	10	10	958000	1	1	1		14270	Calcineurin B homologous protein 1 OS=Homo sapiens OX=9606 GN=CHP1 PE=1 SV=1
1389	2192	tr|F5GX29|F5GX29_HUMAN	52.04	9	9	958000	1	1	1		14725	Calcineurin B homologous protein 1 OS=Homo sapiens OX=9606 GN=CHP1 PE=1 SV=1
1389	2193	tr|H0YNG9|H0YNG9_HUMAN	52.04	8	8	958000	1	1	1		17987	Calcineurin B homologous protein 1 OS=Homo sapiens OX=9606 GN=CHP1 PE=1 SV=1
1389	2194	Q99653|CHP1_HUMAN	52.04	6	6	958000	1	1	1		22456	Calcineurin B homologous protein 1 OS=Homo sapiens OX=9606 GN=CHP1 PE=1 SV=3
890	1684	Q96AQ6|PBIP1_HUMAN	52.04	1	1	740000	1	1	1	Carbamidomethylation	80643	Pre-B-cell leukemia transcription factor-interacting protein 1 OS=Homo sapiens OX=9606 GN=PBXIP1 PE=1 SV=1
1390	2221	P48539|PCP4_HUMAN	50.95	16	16	883000	1	1	1		6791	Calmodulin regulator protein PCP4 OS=Homo sapiens OX=9606 GN=PCP4 PE=1 SV=3
1391	2223	P53597|SUCA_HUMAN	50.58	4	4	0	1	1	1		36250	Succinate--CoA ligase [ADP/GDP-forming] subunit alpha mitochondrial OS=Homo sapiens OX=9606 GN=SUCLG1 PE=1 SV=4
1392	2238	tr|G3V1B6|G3V1B6_HUMAN	50.1	10	10	2490000	1	1	1		13101	MICOS complex subunit MIC26 OS=Homo sapiens OX=9606 GN=APOO PE=1 SV=1
1392	2241	tr|H7C1U8|H7C1U8_HUMAN	50.1	6	6	2490000	1	1	1		20080	MICOS complex subunit (Fragment) OS=Homo sapiens OX=9606 GN=APOO PE=1 SV=1
1392	2242	Q9BUR5|MIC26_HUMAN	50.1	6	6	2490000	1	1	1		22285	MICOS complex subunit MIC26 OS=Homo sapiens OX=9606 GN=APOO PE=1 SV=1
906	1747	tr|E7EX90|E7EX90_HUMAN	50.09	1	1	376000	1	1	1		139094	Dynactin subunit 1 OS=Homo sapiens OX=9606 GN=DCTN1 PE=1 SV=1
906	1748	Q14203|DCTN1_HUMAN	50.09	1	1	376000	1	1	1		141694	Dynactin subunit 1 OS=Homo sapiens OX=9606 GN=DCTN1 PE=1 SV=3
1424	2434	tr|B7ZC39|B7ZC39_HUMAN	49.9	2	2	1820000	1	1	1		41668	Endophilin-B2 OS=Homo sapiens OX=9606 GN=SH3GLB2 PE=1 SV=1
1424	2438	Q9NR46|SHLB2_HUMAN	49.9	2	2	1820000	1	1	1		43974	Endophilin-B2 OS=Homo sapiens OX=9606 GN=SH3GLB2 PE=1 SV=1
1424	2439	tr|B7ZC38|B7ZC38_HUMAN	49.9	2	2	1820000	1	1	1		44361	Endophilin-B2 OS=Homo sapiens OX=9606 GN=SH3GLB2 PE=1 SV=1
885	1663	tr|A6NJA2|A6NJA2_HUMAN	49.34	3	3	0	1	1	1		51087	Ubiquitin carboxyl-terminal hydrolase 14 OS=Homo sapiens OX=9606 GN=USP14 PE=1 SV=2
885	1664	P54578|UBP14_HUMAN	49.34	3	3	0	1	1	1		56069	Ubiquitin carboxyl-terminal hydrolase 14 OS=Homo sapiens OX=9606 GN=USP14 PE=1 SV=3
1393	2256	tr|A8MUT9|A8MUT9_HUMAN	49.29	5	5	2020000	1	1	1		25149	Disks large homolog 2 (Fragment) OS=Homo sapiens OX=9606 GN=DLG2 PE=1 SV=1
1393	2259	tr|Q6ZSU2|Q6ZSU2_HUMAN	49.29	2	2	2020000	1	1	1		59318	Disks large homolog 2 OS=Homo sapiens OX=9606 GN=DLG2 PE=1 SV=1
1393	2261	tr|B7Z264|B7Z264_HUMAN	49.29	2	2	2020000	1	1	1		87896	Disks large homolog 2 OS=Homo sapiens OX=9606 GN=DLG2 PE=1 SV=1
1393	2262	tr|E9PIW2|E9PIW2_HUMAN	49.29	1	1	2020000	1	1	1		90703	Disks large homolog 2 OS=Homo sapiens OX=9606 GN=DLG2 PE=1 SV=1
1393	2263	tr|B7Z2T4|B7Z2T4_HUMAN	49.29	1	1	2020000	1	1	1		95000	Disks large homolog 2 OS=Homo sapiens OX=9606 GN=DLG2 PE=1 SV=1
1393	2264	tr|E9PN83|E9PN83_HUMAN	49.29	1	1	2020000	1	1	1		96480	Disks large homolog 2 OS=Homo sapiens OX=9606 GN=DLG2 PE=1 SV=1
1393	2265	Q15700|DLG2_HUMAN	49.29	1	1	2020000	1	1	1		97552	Disks large homolog 2 OS=Homo sapiens OX=9606 GN=DLG2 PE=1 SV=3
538	1609	P40227|TCPZ_HUMAN	49.27	2	2	1230000	1	1	1		58024	T-complex protein 1 subunit zeta OS=Homo sapiens OX=9606 GN=CCT6A PE=1 SV=3
1402	2316	P17568|NDUB7_HUMAN	48.41	7	7	2470000	1	1	1	Carbamidomethylation	16402	NADH dehydrogenase [ubiquinone] 1 beta subcomplex subunit 7 OS=Homo sapiens OX=9606 GN=NDUFB7 PE=1 SV=4
1394	2278	tr|K7ES72|K7ES72_HUMAN	48.37	9	9	670000	1	1	1		14593	Calcyphosin (Fragment) OS=Homo sapiens OX=9606 GN=CAPS PE=1 SV=2
1394	2279	Q13938|CAYP1_HUMAN	48.37	6	6	670000	1	1	1		20967	Calcyphosin OS=Homo sapiens OX=9606 GN=CAPS PE=1 SV=1
1394	2280	tr|A0A0X1KG78|A0A0X1KG78_HUMAN	48.37	5	5	670000	1	1	1		27042	Calcyphosin OS=Homo sapiens OX=9606 GN=CAPS PE=1 SV=1
1394	2281	tr|K7EL21|K7EL21_HUMAN	48.37	4	4	670000	1	1	1		30240	Calcyphosin OS=Homo sapiens OX=9606 GN=CAPS PE=1 SV=1
1399	2294	tr|C9J1Z8|C9J1Z8_HUMAN	48.35	7	7	960000	1	1	1		17107	ADP-ribosylation factor 5 (Fragment) OS=Homo sapiens OX=9606 GN=ARF5 PE=1 SV=1
1399	2297	P84085|ARF5_HUMAN	48.35	6	6	960000	1	1	1		20530	ADP-ribosylation factor 5 OS=Homo sapiens OX=9606 GN=ARF5 PE=1 SV=2
921	2285	Q969L2|MAL2_HUMAN	48.26	6	6	7580000	1	1	2		19125	Protein MAL2 OS=Homo sapiens OX=9606 GN=MAL2 PE=1 SV=1
1400	2296	tr|G8JLD5|G8JLD5_HUMAN	48.23	2	2	471000	1	1	1		79622	Dynamin-1-like protein OS=Homo sapiens OX=9606 GN=DNM1L PE=1 SV=1
1400	2298	O00429|DNM1L_HUMAN	48.23	1	1	471000	1	1	1		81877	Dynamin-1-like protein OS=Homo sapiens OX=9606 GN=DNM1L PE=1 SV=2
1395	2283	Q9BPX5|ARP5L_HUMAN	48.18	8	8	1960000	1	1	1		16941	Actin-related protein 2/3 complex subunit 5-like protein OS=Homo sapiens OX=9606 GN=ARPC5L PE=1 SV=1
1397	2286	P05109|S10A8_HUMAN	48.12	12	12	0	1	1	1	Carbamidomethylation	10835	Protein S100-A8 OS=Homo sapiens OX=9606 GN=S100A8 PE=1 SV=1
1398	2288	tr|C9JKQ2|C9JKQ2_HUMAN	47.88	17	17	4170000	1	1	1		7586	NADH dehydrogenase [ubiquinone] 1 beta subcomplex subunit 3 (Fragment) OS=Homo sapiens OX=9606 GN=NDUFB3 PE=1 SV=1
1398	2289	O43676|NDUB3_HUMAN	47.88	11	11	4170000	1	1	1		11402	NADH dehydrogenase [ubiquinone] 1 beta subcomplex subunit 3 OS=Homo sapiens OX=9606 GN=NDUFB3 PE=1 SV=3
881	1632	O75323|NIPS2_HUMAN	47.83	3	3	4490000	1	1	1		33743	Protein NipSnap homolog 2 OS=Homo sapiens OX=9606 GN=NIPSNAP2 PE=1 SV=1
922	2302	tr|A0A286YEX5|A0A286YEX5_HUMAN	47.75	11	11	5970000	1	1	1		11398	MICOS complex subunit (Fragment) OS=Homo sapiens OX=9606 GN=CHCHD3 PE=1 SV=1
922	2304	Q9NX63|MIC19_HUMAN	47.75	5	5	5970000	1	1	1		26152	MICOS complex subunit MIC19 OS=Homo sapiens OX=9606 GN=CHCHD3 PE=1 SV=1
922	2305	tr|C9JRZ6|C9JRZ6_HUMAN	47.75	5	5	5970000	1	1	1		26753	MICOS complex subunit OS=Homo sapiens OX=9606 GN=CHCHD3 PE=1 SV=2
922	2306	tr|F8WAR4|F8WAR4_HUMAN	47.75	5	5	5970000	1	1	1		27735	MICOS complex subunit OS=Homo sapiens OX=9606 GN=CHCHD3 PE=1 SV=1
1403	2320	tr|U3KQM0|U3KQM0_HUMAN	47.59	10	10	4340000	1	1	1	Carbamidomethylation	10516	Membrane-associated progesterone receptor component 2 OS=Homo sapiens OX=9606 GN=PGRMC2 PE=1 SV=1
1403	2328	O00264|PGRC1_HUMAN	47.59	5	5	4340000	1	1	1	Carbamidomethylation	21671	Membrane-associated progesterone receptor component 1 OS=Homo sapiens OX=9606 GN=PGRMC1 PE=1 SV=3
1403	2330	O15173|PGRC2_HUMAN	47.59	4	4	4340000	1	1	1	Carbamidomethylation	23818	Membrane-associated progesterone receptor component 2 OS=Homo sapiens OX=9606 GN=PGRMC2 PE=1 SV=1
883	1653	tr|A0A087WXS7|A0A087WXS7_HUMAN	47.36	3	3	1810000	1	1	1		37119	ATPase ASNA1 OS=Homo sapiens OX=9606 GN=ASNA1 PE=1 SV=1
883	1654	O43681|ASNA_HUMAN	47.36	3	3	1810000	1	1	1		38793	ATPase ASNA1 OS=Homo sapiens OX=9606 GN=ASNA1 PE=1 SV=2
1406	2344	P30043|BLVRB_HUMAN	46.73	5	5	1500000	1	1	1		22119	Flavin reductase (NADPH) OS=Homo sapiens OX=9606 GN=BLVRB PE=1 SV=3
1416	2395	P11169|GTR3_HUMAN	46.19	2	2	849000	1	1	1		53924	Solute carrier family 2 facilitated glucose transporter member 3 OS=Homo sapiens OX=9606 GN=SLC2A3 PE=1 SV=1
1416	2396	Q8TDB8|GTR14_HUMAN	46.19	2	2	849000	1	1	1		56320	Solute carrier family 2 facilitated glucose transporter member 14 OS=Homo sapiens OX=9606 GN=SLC2A14 PE=2 SV=1
1407	2347	tr|C9JR52|C9JR52_HUMAN	46.1	6	6	890000	1	1	1	Carbamidomethylation	18877	Pleiotrophin OS=Homo sapiens OX=9606 GN=PTN PE=1 SV=1
1407	2348	P21246|PTN_HUMAN	46.1	6	6	890000	1	1	1	Carbamidomethylation	18942	Pleiotrophin OS=Homo sapiens OX=9606 GN=PTN PE=1 SV=1
1404	2334	Q9P0L0|VAPA_HUMAN	45.93	6	6	0	1	1	1		27893	Vesicle-associated membrane protein-associated protein A OS=Homo sapiens OX=9606 GN=VAPA PE=1 SV=3
1405	2336	tr|C9J1E7|C9J1E7_HUMAN	45.8	3	3	0	1	1	1		65315	AP-1 complex subunit beta-1 (Fragment) OS=Homo sapiens OX=9606 GN=AP1B1 PE=1 SV=1
1405	2337	tr|A0A087WYD1|A0A087WYD1_HUMAN	45.8	2	2	0	1	1	1		70917	AP-2 complex subunit beta (Fragment) OS=Homo sapiens OX=9606 GN=AP2B1 PE=1 SV=1
1405	2338	tr|A0A087WU93|A0A087WU93_HUMAN	45.8	2	2	0	1	1	1		74137	AP-2 complex subunit beta (Fragment) OS=Homo sapiens OX=9606 GN=AP2B1 PE=1 SV=1
1405	2339	tr|A0A087WZQ6|A0A087WZQ6_HUMAN	45.8	2	2	0	1	1	1		75276	AP-2 complex subunit beta (Fragment) OS=Homo sapiens OX=9606 GN=AP2B1 PE=1 SV=1
1405	2340	tr|A0A087X253|A0A087X253_HUMAN	45.8	2	2	0	1	1	1		101333	AP complex subunit beta OS=Homo sapiens OX=9606 GN=AP2B1 PE=1 SV=1
1405	2341	P63010|AP2B1_HUMAN	45.8	2	2	0	1	1	1		104553	AP-2 complex subunit beta OS=Homo sapiens OX=9606 GN=AP2B1 PE=1 SV=1
1405	2342	Q10567|AP1B1_HUMAN	45.8	2	2	0	1	1	1		104637	AP-1 complex subunit beta-1 OS=Homo sapiens OX=9606 GN=AP1B1 PE=1 SV=2
882	1634	tr|H0Y8M2|H0Y8M2_HUMAN	45.62	5	5	0	1	1	1		27553	Rap1 GTPase-GDP dissociation stimulator 1 (Fragment) OS=Homo sapiens OX=9606 GN=RAP1GDS1 PE=1 SV=1
882	1635	P52306|GDS1_HUMAN	45.62	2	2	0	1	1	1		66317	Rap1 GTPase-GDP dissociation stimulator 1 OS=Homo sapiens OX=9606 GN=RAP1GDS1 PE=1 SV=3
1408	2361	Q96ID5|IGS21_HUMAN	45.38	2	2	632000	1	1	1		51835	Immunoglobulin superfamily member 21 OS=Homo sapiens OX=9606 GN=IGSF21 PE=2 SV=1
1409	2362	tr|H0Y9X3|H0Y9X3_HUMAN	45.2	11	11	1070000	1	1	1		12171	Programmed cell death protein 6 (Fragment) OS=Homo sapiens OX=9606 GN=PDCD6 PE=1 SV=1
1409	2363	tr|A0A024QZ42|A0A024QZ42_HUMAN	45.2	9	9	1070000	1	1	1		14450	HCG1985580 isoform CRA_c OS=Homo sapiens OX=9606 GN=PDCD6 PE=1 SV=1
1409	2364	tr|A0A087WZ38|A0A087WZ38_HUMAN	45.2	9	9	1070000	1	1	1		13959	Programmed cell death protein 6 OS=Homo sapiens OX=9606 GN=PDCD6 PE=1 SV=1
1409	2365	O75340|PDCD6_HUMAN	45.2	6	6	1070000	1	1	1		21868	Programmed cell death protein 6 OS=Homo sapiens OX=9606 GN=PDCD6 PE=1 SV=1
1410	2375	Q99747|SNAG_HUMAN	44.84	4	4	884000	1	1	1		34746	Gamma-soluble NSF attachment protein OS=Homo sapiens OX=9606 GN=NAPG PE=1 SV=1
880	1621	tr|G3V5V7|G3V5V7_HUMAN	44.62	6	6	2430000	1	1	1		20254	Heterogeneous nuclear ribonucleoproteins C1/C2 (Fragment) OS=Homo sapiens OX=9606 GN=HNRNPC PE=1 SV=1
880	1622	tr|G3V2D6|G3V2D6_HUMAN	44.62	5	5	2430000	1	1	1		23808	Heterogeneous nuclear ribonucleoproteins C1/C2 (Fragment) OS=Homo sapiens OX=9606 GN=HNRNPC PE=1 SV=1
880	1623	tr|G3V576|G3V576_HUMAN	44.62	5	5	2430000	1	1	1		25257	Heterogeneous nuclear ribonucleoproteins C1/C2 OS=Homo sapiens OX=9606 GN=HNRNPC PE=1 SV=1
880	1624	tr|G3V4W0|G3V4W0_HUMAN	44.62	4	4	2430000	1	1	1		28916	Heterogeneous nuclear ribonucleoproteins C1/C2 (Fragment) OS=Homo sapiens OX=9606 GN=HNRNPC PE=1 SV=1
880	1625	tr|B4DY08|B4DY08_HUMAN	44.62	4	4	2430000	1	1	1		31972	Heterogeneous nuclear ribonucleoproteins C1/C2 OS=Homo sapiens OX=9606 GN=HNRNPC PE=1 SV=1
880	1626	tr|B2R5W2|B2R5W2_HUMAN	44.62	4	4	2430000	1	1	1		31948	Heterogeneous nuclear ribonucleoproteins C1/C2 OS=Homo sapiens OX=9606 GN=HNRNPC PE=1 SV=1
880	1627	tr|G3V4C1|G3V4C1_HUMAN	44.62	4	4	2430000	1	1	1		32238	Heterogeneous nuclear ribonucleoproteins C1/C2 OS=Homo sapiens OX=9606 GN=HNRNPC PE=1 SV=1
880	1628	tr|G3V2Q1|G3V2Q1_HUMAN	44.62	4	4	2430000	1	1	1		33571	Heterogeneous nuclear ribonucleoproteins C1/C2 OS=Homo sapiens OX=9606 GN=HNRNPC PE=1 SV=1
880	1629	P07910|HNRPC_HUMAN	44.62	4	4	2430000	1	1	1		33670	Heterogeneous nuclear ribonucleoproteins C1/C2 OS=Homo sapiens OX=9606 GN=HNRNPC PE=1 SV=4
529	1162	Q9Y4W6|AFG32_HUMAN	44.56	2	2	12900000	2	1	2		88584	AFG3-like protein 2 OS=Homo sapiens OX=9606 GN=AFG3L2 PE=1 SV=2
1413	2392	P00846|ATP6_HUMAN	44.35	4	4	3220000	1	1	1		24817	ATP synthase subunit a OS=Homo sapiens OX=9606 GN=MT-ATP6 PE=1 SV=1
1417	2407	P18206|VINC_HUMAN	44.33	1	1	527000	1	1	1		123799	Vinculin OS=Homo sapiens OX=9606 GN=VCL PE=1 SV=4
1411	2385	Q9UPA5|BSN_HUMAN	44.23	0	0	1210000	1	1	1		416475	Protein bassoon OS=Homo sapiens OX=9606 GN=BSN PE=1 SV=4
1412	2386	tr|U3KPX1|U3KPX1_HUMAN	44	20	20	0	1	1	1		7351	Acylphosphatase (Fragment) OS=Homo sapiens OX=9606 GN=ACYP2 PE=1 SV=1
1412	2387	tr|U3KPX8|U3KPX8_HUMAN	44	16	16	0	1	1	1		9318	Acylphosphatase-2 OS=Homo sapiens OX=9606 GN=ACYP2 PE=1 SV=1
1412	2388	tr|E9PF46|E9PF46_HUMAN	44	13	13	0	1	1	1		10298	Acylphosphatase OS=Homo sapiens OX=9606 GN=ACYP2 PE=1 SV=1
1412	2389	tr|F8WA34|F8WA34_HUMAN	44	13	13	0	1	1	1		10296	Acylphosphatase OS=Homo sapiens OX=9606 GN=ACYP2 PE=1 SV=1
1412	2390	P14621|ACYP2_HUMAN	44	13	13	0	1	1	1		11140	Acylphosphatase-2 OS=Homo sapiens OX=9606 GN=ACYP2 PE=1 SV=2
1412	2391	tr|U3KQL2|U3KQL2_HUMAN	44	8	8	0	1	1	1		19578	Acylphosphatase OS=Homo sapiens OX=9606 GN=ACYP2 PE=1 SV=1
1414	1773	Q8N573|OXR1_HUMAN	43.86	1	1	855000	1	1	1		97970	Oxidation resistance protein 1 OS=Homo sapiens OX=9606 GN=OXR1 PE=1 SV=2
1415	2393	tr|A0A075B6E2|A0A075B6E2_HUMAN	43.77	14	14	276000	1	1	1		7831	40S ribosomal protein S19 OS=Homo sapiens OX=9606 GN=RPS19 PE=1 SV=1
1415	2394	P39019|RS19_HUMAN	43.77	7	7	276000	1	1	1		16060	40S ribosomal protein S19 OS=Homo sapiens OX=9606 GN=RPS19 PE=1 SV=2
1420	2420	O95747|OXSR1_HUMAN	43.48	2	2	379000	1	1	1		58022	Serine/threonine-protein kinase OSR1 OS=Homo sapiens OX=9606 GN=OXSR1 PE=1 SV=1
896	1702	O60493|SNX3_HUMAN	43.02	6	6	746000	1	1	1		18762	Sorting nexin-3 OS=Homo sapiens OX=9606 GN=SNX3 PE=1 SV=3
1418	2413	tr|J3QL92|J3QL92_HUMAN	43	2	2	444000	1	1	1		55250	Microtubule cross-linking factor 1 OS=Homo sapiens OX=9606 GN=MTCL1 PE=1 SV=1
1418	2417	tr|E9PJP2|E9PJP2_HUMAN	43	1	1	444000	1	1	1		102885	Protein SOGA3 OS=Homo sapiens OX=9606 GN=SOGA3 PE=1 SV=1
1418	2418	Q5TF21|SOGA3_HUMAN	43	1	1	444000	1	1	1		103199	Protein SOGA3 OS=Homo sapiens OX=9606 GN=SOGA3 PE=3 SV=1
1418	2421	Q9Y4B5|MTCL1_HUMAN	43	1	1	444000	1	1	1		209525	Microtubule cross-linking factor 1 OS=Homo sapiens OX=9606 GN=MTCL1 PE=1 SV=5
1419	2414	tr|E9PS50|E9PS50_HUMAN	42.95	9	9	0	1	1	1		12460	40S ribosomal protein S13 (Fragment) OS=Homo sapiens OX=9606 GN=RPS13 PE=1 SV=1
1419	2415	tr|J3KMX5|J3KMX5_HUMAN	42.95	7	7	0	1	1	1		16733	40S ribosomal protein S13 OS=Homo sapiens OX=9606 GN=RPS13 PE=1 SV=1
1419	2416	P62277|RS13_HUMAN	42.95	7	7	0	1	1	1		17222	40S ribosomal protein S13 OS=Homo sapiens OX=9606 GN=RPS13 PE=1 SV=2
897	1704	P17252|KPCA_HUMAN	42.86	1	1	139000	1	1	1	Carbamidomethylation	76750	Protein kinase C alpha type OS=Homo sapiens OX=9606 GN=PRKCA PE=1 SV=4
1421	2422	tr|C9JTY3|C9JTY3_HUMAN	42.66	8	8	1850000	1	1	1		14759	Protein TFG (Fragment) OS=Homo sapiens OX=9606 GN=TFG PE=1 SV=1
1421	2423	tr|C9JUE0|C9JUE0_HUMAN	42.66	6	6	1850000	1	1	1		17731	Protein TFG (Fragment) OS=Homo sapiens OX=9606 GN=TFG PE=1 SV=1
1421	2424	tr|C9JJP5|C9JJP5_HUMAN	42.66	6	6	1850000	1	1	1		20365	Protein TFG (Fragment) OS=Homo sapiens OX=9606 GN=TFG PE=1 SV=1
1421	2430	Q92734|TFG_HUMAN	42.66	2	2	1850000	1	1	1		43448	Protein TFG OS=Homo sapiens OX=9606 GN=TFG PE=1 SV=2
1433	2466	tr|D6RFW1|D6RFW1_HUMAN	42.51	4	4	962000	1	1	1		21830	Small glutamine-rich tetratricopeptide repeat-containing protein beta (Fragment) OS=Homo sapiens OX=9606 GN=SGTB PE=1 SV=1
1433	2475	Q96EQ0|SGTB_HUMAN	42.51	3	3	962000	1	1	1		33429	Small glutamine-rich tetratricopeptide repeat-containing protein beta OS=Homo sapiens OX=9606 GN=SGTB PE=1 SV=1
1423	2429	tr|C9JPM4|C9JPM4_HUMAN	42.46	8	8	433000	1	1	1		14553	ADP-ribosylation factor 4 (Fragment) OS=Homo sapiens OX=9606 GN=ARF4 PE=1 SV=1
1423	2431	tr|C9JAK5|C9JAK5_HUMAN	42.46	7	7	433000	1	1	1		17699	ADP-ribosylation factor 4 OS=Homo sapiens OX=9606 GN=ARF4 PE=1 SV=1
1423	2432	P18085|ARF4_HUMAN	42.46	6	6	433000	1	1	1		20511	ADP-ribosylation factor 4 OS=Homo sapiens OX=9606 GN=ARF4 PE=1 SV=3
1422	2428	Q7Z2K8|GRIN1_HUMAN	42.44	1	1	205000	1	1	1		102399	G protein-regulated inducer of neurite outgrowth 1 OS=Homo sapiens OX=9606 GN=GPRIN1 PE=1 SV=2
1428	2450	Q969E8|TSR2_HUMAN	41.65	5	5	968000	1	1	1	Carbamidomethylation	20894	Pre-rRNA-processing protein TSR2 homolog OS=Homo sapiens OX=9606 GN=TSR2 PE=1 SV=1
1429	2453	tr|H7BYN3|H7BYN3_HUMAN	41.54	4	4	0	1	1	1	Carbamidomethylation	25686	Transcription factor A mitochondrial (Fragment) OS=Homo sapiens OX=9606 GN=TFAM PE=1 SV=1
1429	2455	Q00059|TFAM_HUMAN	41.54	4	4	0	1	1	1	Carbamidomethylation	29097	Transcription factor A mitochondrial OS=Homo sapiens OX=9606 GN=TFAM PE=1 SV=1
1425	2440	tr|F5H282|F5H282_HUMAN	41.36	4	4	360000	1	1	1		36456	T-complex protein 1 subunit alpha OS=Homo sapiens OX=9606 GN=TCP1 PE=1 SV=1
1425	2441	tr|E7EQR6|E7EQR6_HUMAN	41.36	3	3	360000	1	1	1		43886	T-complex protein 1 subunit alpha OS=Homo sapiens OX=9606 GN=TCP1 PE=1 SV=1
1425	2442	P17987|TCPA_HUMAN	41.36	2	2	360000	1	1	1		60344	T-complex protein 1 subunit alpha OS=Homo sapiens OX=9606 GN=TCP1 PE=1 SV=1
1432	2465	tr|D6R9Q9|D6R9Q9_HUMAN	40.94	2	2	0	1	1	1		41448	Drebrin OS=Homo sapiens OX=9606 GN=DBN1 PE=1 SV=1
1432	2470	Q16643|DREB_HUMAN	40.94	1	1	0	1	1	1		71429	Drebrin OS=Homo sapiens OX=9606 GN=DBN1 PE=1 SV=4
1427	2446	tr|H3BPJ2|H3BPJ2_HUMAN	40.94	10	10	0	1	1	1	Carbamidomethylation	12006	ADP-ribosylation factor-like protein 6-interacting protein 1 (Fragment) OS=Homo sapiens OX=9606 GN=ARL6IP1 PE=4 SV=2
1427	2448	Q15041|AR6P1_HUMAN	40.94	5	5	0	1	1	1	Carbamidomethylation	23363	ADP-ribosylation factor-like protein 6-interacting protein 1 OS=Homo sapiens OX=9606 GN=ARL6IP1 PE=1 SV=2
1427	2449	tr|H3BN98|H3BN98_HUMAN	40.94	4	4	0	1	1	1	Carbamidomethylation	27168	Uncharacterized protein (Fragment) OS=Homo sapiens OX=9606 PE=4 SV=2
1426	2443	tr|H7C4L9|H7C4L9_HUMAN	40.93	41	41	2810000	1	1	1		2789	Sodium/potassium-transporting ATPase subunit beta-3 (Fragment) OS=Homo sapiens OX=9606 GN=ATP1B3 PE=1 SV=1
1426	2444	tr|C9JA36|C9JA36_HUMAN	40.93	8	8	2810000	1	1	1		14968	Sodium/potassium-transporting ATPase subunit beta-3 (Fragment) OS=Homo sapiens OX=9606 GN=ATP1B3 PE=1 SV=1
1426	2445	P54709|AT1B3_HUMAN	40.93	4	4	2810000	1	1	1		31513	Sodium/potassium-transporting ATPase subunit beta-3 OS=Homo sapiens OX=9606 GN=ATP1B3 PE=1 SV=1
1431	2463	tr|K7EKW9|K7EKW9_HUMAN	40.83	4	4	711000	1	1	1		27979	Flotillin-2 (Fragment) OS=Homo sapiens OX=9606 GN=FLOT2 PE=1 SV=1
1431	2468	tr|J3QLD9|J3QLD9_HUMAN	40.83	2	2	711000	1	1	1		47142	Flotillin-2 OS=Homo sapiens OX=9606 GN=FLOT2 PE=1 SV=1
1431	2467	Q14254|FLOT2_HUMAN	40.83	2	2	711000	1	1	1		47064	Flotillin-2 OS=Homo sapiens OX=9606 GN=FLOT2 PE=1 SV=2
1431	2469	tr|E7EMK3|E7EMK3_HUMAN	40.83	2	2	711000	1	1	1		53137	Flotillin-2 OS=Homo sapiens OX=9606 GN=FLOT2 PE=1 SV=1
1430	2458	O43752|STX6_HUMAN	40.72	5	5	0	1	1	1		29176	Syntaxin-6 OS=Homo sapiens OX=9606 GN=STX6 PE=1 SV=1
546	2477	P05556|ITB1_HUMAN	40.4	1	1	728000	1	1	1		88415	Integrin beta-1 OS=Homo sapiens OX=9606 GN=ITGB1 PE=1 SV=2
1439	2502	P07099|HYEP_HUMAN	40.18	2	2	1440000	1	1	1		52949	Epoxide hydrolase 1 OS=Homo sapiens OX=9606 GN=EPHX1 PE=1 SV=1
1434	2479	tr|A6PVN7|A6PVN7_HUMAN	40.1	16	16	2000000	1	1	1		7401	Serine/threonine-protein phosphatase 2A activator (Fragment) OS=Homo sapiens OX=9606 GN=PTPA PE=1 SV=1
1434	2481	tr|A6PVN8|A6PVN8_HUMAN	40.1	8	8	2000000	1	1	1		14430	Serine/threonine-protein phosphatase 2A activator (Fragment) OS=Homo sapiens OX=9606 GN=PTPA PE=1 SV=1
1434	2482	tr|C9IZ76|C9IZ76_HUMAN	40.1	8	8	2000000	1	1	1		14574	Serine/threonine-protein phosphatase 2A activator (Fragment) OS=Homo sapiens OX=9606 GN=PTPA PE=1 SV=1
1434	2485	tr|A6PVN6|A6PVN6_HUMAN	40.1	6	6	2000000	1	1	1		19319	Serine/threonine-protein phosphatase 2A activator (Fragment) OS=Homo sapiens OX=9606 GN=PTPA PE=1 SV=1
1434	2487	tr|Q5T949|Q5T949_HUMAN	40.1	4	4	2000000	1	1	1		28095	Serine/threonine-protein phosphatase 2A activator (Fragment) OS=Homo sapiens OX=9606 GN=PTPA PE=1 SV=1
1434	2488	tr|Q5T948|Q5T948_HUMAN	40.1	4	4	2000000	1	1	1		28483	Serine/threonine-protein phosphatase 2A activator (Fragment) OS=Homo sapiens OX=9606 GN=PTPA PE=1 SV=8
1434	2489	tr|A6PVN9|A6PVN9_HUMAN	40.1	4	4	2000000	1	1	1		30159	Serine/threonine-protein phosphatase 2A activator (Fragment) OS=Homo sapiens OX=9606 GN=PTPA PE=1 SV=1
1434	2490	tr|F6WIT2|F6WIT2_HUMAN	40.1	3	3	2000000	1	1	1		32936	Serine/threonine-protein phosphatase 2A activator OS=Homo sapiens OX=9606 GN=PTPA PE=1 SV=1
1434	2492	tr|A6PVN5|A6PVN5_HUMAN	40.1	3	3	2000000	1	1	1		37376	Serine/threonine-protein phosphatase 2A activator OS=Homo sapiens OX=9606 GN=PTPA PE=1 SV=1
1434	2493	Q15257|PTPA_HUMAN	40.1	3	3	2000000	1	1	1		40668	Serine/threonine-protein phosphatase 2A activator OS=Homo sapiens OX=9606 GN=PTPA PE=1 SV=3
1435	2484	P31151|S10A7_HUMAN	40	11	11	485000	1	1	1		11471	Protein S100-A7 OS=Homo sapiens OX=9606 GN=S100A7 PE=1 SV=4
1435	2483	Q86SG5|S1A7A_HUMAN	40	11	11	485000	1	1	1		11305	Protein S100-A7A OS=Homo sapiens OX=9606 GN=S100A7A PE=1 SV=3
1436	2495	O43678|NDUA2_HUMAN	39.85	9	9	1430000	1	1	1		10922	NADH dehydrogenase [ubiquinone] 1 alpha subcomplex subunit 2 OS=Homo sapiens OX=9606 GN=NDUFA2 PE=1 SV=3
1438	2501	tr|H0YCM0|H0YCM0_HUMAN	39.78	5	5	602000	1	1	1		18640	Serine/threonine-protein kinase PAK 1 (Fragment) OS=Homo sapiens OX=9606 GN=PAK1 PE=1 SV=1
1438	2504	tr|E9PM17|E9PM17_HUMAN	39.78	2	2	602000	1	1	1		50877	Serine/threonine-protein kinase PAK 1 OS=Homo sapiens OX=9606 GN=PAK1 PE=1 SV=1
1438	2505	tr|B3KNX7|B3KNX7_HUMAN	39.78	2	2	602000	1	1	1		58203	Non-specific serine/threonine protein kinase OS=Homo sapiens OX=9606 GN=PAK1 PE=1 SV=1
1438	2506	Q13153|PAK1_HUMAN	39.78	2	2	602000	1	1	1		60647	Serine/threonine-protein kinase PAK 1 OS=Homo sapiens OX=9606 GN=PAK1 PE=1 SV=2
1437	2496	tr|E9PLF1|E9PLF1_HUMAN	39.33	12	12	0	1	1	1		17369	Glutathione S-transferase Mu 2 (Fragment) OS=Homo sapiens OX=9606 GN=GSTM2 PE=1 SV=2
1437	2497	tr|E9PHN7|E9PHN7_HUMAN	39.33	9	9	0	1	1	1		21363	Glutathione S-transferase Mu 2 OS=Homo sapiens OX=9606 GN=GSTM2 PE=1 SV=2
1437	2498	tr|E9PHN6|E9PHN6_HUMAN	39.33	9	9	0	1	1	1		22876	Glutathione S-transferase OS=Homo sapiens OX=9606 GN=GSTM2 PE=1 SV=1
1437	2499	P28161|GSTM2_HUMAN	39.33	8	8	0	1	1	1		25745	Glutathione S-transferase Mu 2 OS=Homo sapiens OX=9606 GN=GSTM2 PE=1 SV=2
1437	2500	tr|F6XZQ7|F6XZQ7_HUMAN	39.33	8	8	0	1	1	1		26098	Glutathione S-transferase OS=Homo sapiens OX=9606 GN=GSTM2 PE=1 SV=1
1442	2519	Q3MIR4|CC50B_HUMAN	39.25	2	2	3970000	1	1	1		38941	Cell cycle control protein 50B OS=Homo sapiens OX=9606 GN=TMEM30B PE=1 SV=1
1442	2524	Q9NV96|CC50A_HUMAN	39.25	2	2	3970000	1	1	1		40684	Cell cycle control protein 50A OS=Homo sapiens OX=9606 GN=TMEM30A PE=1 SV=1
927	2638	Q9P2U7|VGLU1_HUMAN	39.18	1	1	6770000	1	1	2		61613	Vesicular glutamate transporter 1 OS=Homo sapiens OX=9606 GN=SLC17A7 PE=2 SV=1
909	1754	tr|E9PCX7|E9PCX7_HUMAN	39.06	1	1	0	1	1	1		99729	NAD(P) transhydrogenase mitochondrial OS=Homo sapiens OX=9606 GN=NNT PE=1 SV=1
909	1758	Q13423|NNTM_HUMAN	39.06	1	1	0	1	1	1		113895	NAD(P) transhydrogenase mitochondrial OS=Homo sapiens OX=9606 GN=NNT PE=1 SV=3
1440	2513	O94919|ENDD1_HUMAN	38.84	2	2	573000	1	1	1		55017	Endonuclease domain-containing 1 protein OS=Homo sapiens OX=9606 GN=ENDOD1 PE=1 SV=2
1441	2514	P05386|RLA1_HUMAN	38.81	14	14	1080000	1	1	1		11514	60S acidic ribosomal protein P1 OS=Homo sapiens OX=9606 GN=RPLP1 PE=1 SV=1
1443	2520	tr|H0Y8F7|H0Y8F7_HUMAN	38.39	9	9	946000	1	1	1		13748	Dihydropteridine reductase (Fragment) OS=Homo sapiens OX=9606 GN=QDPR PE=1 SV=1
1443	2521	tr|B7Z415|B7Z415_HUMAN	38.39	7	7	946000	1	1	1		16043	Dihydropteridine reductase OS=Homo sapiens OX=9606 GN=QDPR PE=1 SV=1
1443	2522	tr|D6RGG7|D6RGG7_HUMAN	38.39	7	7	946000	1	1	1		17014	Dihydropteridine reductase OS=Homo sapiens OX=9606 GN=QDPR PE=1 SV=1
1443	2523	P09417|DHPR_HUMAN	38.39	5	5	946000	1	1	1		25790	Dihydropteridine reductase OS=Homo sapiens OX=9606 GN=QDPR PE=1 SV=2
907	1750	tr|E7EQG2|E7EQG2_HUMAN	38.16	3	3	0	1	1	1		41290	Eukaryotic initiation factor 4A-II OS=Homo sapiens OX=9606 GN=EIF4A2 PE=1 SV=1
907	1751	Q14240|IF4A2_HUMAN	38.16	3	3	0	1	1	1		46402	Eukaryotic initiation factor 4A-II OS=Homo sapiens OX=9606 GN=EIF4A2 PE=1 SV=2
886	1667	tr|K7EQA9|K7EQA9_HUMAN	38	4	4	498000	1	1	1		27435	Hsp90 co-chaperone Cdc37 (Fragment) OS=Homo sapiens OX=9606 GN=CDC37 PE=1 SV=1
886	1668	tr|K7EKQ2|K7EKQ2_HUMAN	38	3	3	498000	1	1	1		41660	Hsp90 co-chaperone Cdc37 (Fragment) OS=Homo sapiens OX=9606 GN=CDC37 PE=1 SV=1
886	1669	Q16543|CDC37_HUMAN	38	2	2	498000	1	1	1		44468	Hsp90 co-chaperone Cdc37 OS=Homo sapiens OX=9606 GN=CDC37 PE=1 SV=1
1444	2526	tr|F8W0U6|F8W0U6_HUMAN	37.79	20	20	2700000	1	1	1		5091	Dynactin subunit 2 OS=Homo sapiens OX=9606 GN=DCTN2 PE=1 SV=1
1444	2531	tr|F8VRV7|F8VRV7_HUMAN	37.79	6	6	2700000	1	1	1		17036	Dynactin subunit 2 (Fragment) OS=Homo sapiens OX=9606 GN=DCTN2 PE=1 SV=8
1444	2534	tr|F8VW18|F8VW18_HUMAN	37.79	3	3	2700000	1	1	1		30526	Dynactin subunit 2 (Fragment) OS=Homo sapiens OX=9606 GN=DCTN2 PE=1 SV=1
1444	2536	tr|F8W1I6|F8W1I6_HUMAN	37.79	3	3	2700000	1	1	1		34259	Dynactin subunit 2 OS=Homo sapiens OX=9606 GN=DCTN2 PE=1 SV=1
1444	2539	Q13561|DCTN2_HUMAN	37.79	2	2	2700000	1	1	1		44231	Dynactin subunit 2 OS=Homo sapiens OX=9606 GN=DCTN2 PE=1 SV=4
1445	2538	tr|E9PRJ5|E9PRJ5_HUMAN	37.74	11	11	2330000	1	1	1		8266	NADH dehydrogenase [ubiquinone] 1 subunit C2 OS=Homo sapiens OX=9606 GN=NDUFC2 PE=1 SV=1
1445	2541	O95298|NDUC2_HUMAN	37.74	7	7	2330000	1	1	1		14188	NADH dehydrogenase [ubiquinone] 1 subunit C2 OS=Homo sapiens OX=9606 GN=NDUFC2 PE=1 SV=1
894	1700	Q14894|CRYM_HUMAN	37.73	3	3	950000	1	1	1		33776	Ketimine reductase mu-crystallin OS=Homo sapiens OX=9606 GN=CRYM PE=1 SV=1
1456	2614	P08574|CY1_HUMAN	37.66	2	2	3670000	1	1	1	Carbamidomethylation	35422	Cytochrome c1 heme protein mitochondrial OS=Homo sapiens OX=9606 GN=CYC1 PE=1 SV=3
1446	2552	tr|A0A087WZ51|A0A087WZ51_HUMAN	37.41	7	7	1280000	1	1	1		16306	Tumor protein D54 OS=Homo sapiens OX=9606 GN=TPD52L2 PE=1 SV=1
1446	2553	O43399|TPD54_HUMAN	37.41	5	5	1280000	1	1	1		22238	Tumor protein D54 OS=Homo sapiens OX=9606 GN=TPD52L2 PE=1 SV=2
1446	2554	tr|A0A087WYR3|A0A087WYR3_HUMAN	37.41	5	5	1280000	1	1	1		23765	Tumor protein D54 OS=Homo sapiens OX=9606 GN=TPD52L2 PE=1 SV=1
1448	2565	tr|H3BQ50|H3BQ50_HUMAN	37.19	14	14	1520000	1	1	1		6667	Gamma-aminobutyric acid receptor-associated protein-like 2 OS=Homo sapiens OX=9606 GN=GABARAPL2 PE=1 SV=1
1448	2568	tr|H3BSM5|H3BSM5_HUMAN	37.19	9	9	1520000	1	1	1		10401	Gamma-aminobutyric acid receptor-associated protein-like 2 OS=Homo sapiens OX=9606 GN=GABARAPL2 PE=1 SV=1
1448	2571	P60520|GBRL2_HUMAN	37.19	7	7	1520000	1	1	1		13667	Gamma-aminobutyric acid receptor-associated protein-like 2 OS=Homo sapiens OX=9606 GN=GABARAPL2 PE=1 SV=1
899	1708	O15083|ERC2_HUMAN	36.94	1	1	0	1	1	1		110557	ERC protein 2 OS=Homo sapiens OX=9606 GN=ERC2 PE=1 SV=3
339	1170	P02549|SPTA1_HUMAN	36.85	1	1	0	1	1	2		280013	Spectrin alpha chain erythrocytic 1 OS=Homo sapiens OX=9606 GN=SPTA1 PE=1 SV=5
1447	2564	Q9NX14|NDUBB_HUMAN	36.74	7	7	2260000	1	1	1		17317	NADH dehydrogenase [ubiquinone] 1 beta subcomplex subunit 11 mitochondrial OS=Homo sapiens OX=9606 GN=NDUFB11 PE=1 SV=1
665	1610	tr|R4GN98|R4GN98_HUMAN	36.59	9	9	10800000	1	1	2		9681	Protein S100 (Fragment) OS=Homo sapiens OX=9606 GN=S100A6 PE=1 SV=1
665	1611	P06703|S10A6_HUMAN	36.59	9	9	10800000	1	1	2		10180	Protein S100-A6 OS=Homo sapiens OX=9606 GN=S100A6 PE=1 SV=1
1459	2646	tr|M0QZM1|M0QZM1_HUMAN	36.45	2	2	426000	1	1	1		40052	Heterogeneous nuclear ribonucleoprotein M (Fragment) OS=Homo sapiens OX=9606 GN=HNRNPM PE=1 SV=1
1459	2712	P52272|HNRPM_HUMAN	36.45	1	1	426000	1	1	1		77516	Heterogeneous nuclear ribonucleoprotein M OS=Homo sapiens OX=9606 GN=HNRNPM PE=1 SV=3
1459	2711	tr|A0A087X0X3|A0A087X0X3_HUMAN	36.45	1	1	426000	1	1	1		77570	Heterogeneous nuclear ribonucleoprotein M OS=Homo sapiens OX=9606 GN=HNRNPM PE=1 SV=1
926	2570	P10114|RAP2A_HUMAN	36.35	5	5	626000	1	1	1		20615	Ras-related protein Rap-2a OS=Homo sapiens OX=9606 GN=RAP2A PE=1 SV=1
1451	2574	Q08495|DEMA_HUMAN	36.28	2	2	0	1	1	1		45514	Dematin OS=Homo sapiens OX=9606 GN=DMTN PE=1 SV=3
675	1784	P80404|GABT_HUMAN	36.15	2	2	669000	1	1	1		56439	4-aminobutyrate aminotransferase mitochondrial OS=Homo sapiens OX=9606 GN=ABAT PE=1 SV=3
675	1786	tr|H3BRN4|H3BRN4_HUMAN	36.15	2	2	669000	1	1	1		58141	4-aminobutyrate aminotransferase mitochondrial OS=Homo sapiens OX=9606 GN=ABAT PE=1 SV=1
675	1785	tr|H3BNQ7|H3BNQ7_HUMAN	36.15	2	2	669000	1	1	1		57924	4-aminobutyrate aminotransferase mitochondrial OS=Homo sapiens OX=9606 GN=ABAT PE=1 SV=1
1449	2569	P03905|NU4M_HUMAN	36.03	3	3	556000	1	1	1		51581	NADH-ubiquinone oxidoreductase chain 4 OS=Homo sapiens OX=9606 GN=MT-ND4 PE=1 SV=1
1450	2572	Q99798|ACON_HUMAN	36.01	1	1	1500000	1	1	1		85425	Aconitate hydratase mitochondrial OS=Homo sapiens OX=9606 GN=ACO2 PE=1 SV=2
1450	2573	tr|A2A274|A2A274_HUMAN	36.01	1	1	1500000	1	1	1		87820	Aconitate hydratase mitochondrial OS=Homo sapiens OX=9606 GN=ACO2 PE=1 SV=1
1452	2584	P19105|ML12A_HUMAN	35.83	5	5	3470000	1	1	1		19794	Myosin regulatory light chain 12A OS=Homo sapiens OX=9606 GN=MYL12A PE=1 SV=2
1452	2586	O14950|ML12B_HUMAN	35.83	5	5	3470000	1	1	1		19779	Myosin regulatory light chain 12B OS=Homo sapiens OX=9606 GN=MYL12B PE=1 SV=2
1452	2585	P24844|MYL9_HUMAN	35.83	5	5	3470000	1	1	1		19827	Myosin regulatory light polypeptide 9 OS=Homo sapiens OX=9606 GN=MYL9 PE=1 SV=4
1452	2587	tr|J3QRS3|J3QRS3_HUMAN	35.83	5	5	3470000	1	1	1		20457	Myosin regulatory light chain 12A OS=Homo sapiens OX=9606 GN=MYL12A PE=1 SV=1
1453	2589	tr|G3V2Q7|G3V2Q7_HUMAN	35.79	24	24	1350000	1	1	1		3953	Chromogranin-A OS=Homo sapiens OX=9606 GN=CHGA PE=4 SV=1
1453	2591	tr|G5E968|G5E968_HUMAN	35.79	3	3	1350000	1	1	1		34269	Chromogranin A (Parathyroid secretory protein 1) isoform CRA_b OS=Homo sapiens OX=9606 GN=CHGA PE=1 SV=1
1453	2609	P10645|CMGA_HUMAN	35.79	2	2	1350000	1	1	1		50688	Chromogranin-A OS=Homo sapiens OX=9606 GN=CHGA PE=1 SV=7
1455	1781	tr|Q86YM6|Q86YM6_HUMAN	35.79	4	4	3260000	1	1	1		20819	HOMER1F OS=Homo sapiens OX=9606 GN=HOMER1 PE=1 SV=1
1455	1782	Q86YM7|HOME1_HUMAN	35.79	2	2	3260000	1	1	1		40277	Homer protein homolog 1 OS=Homo sapiens OX=9606 GN=HOMER1 PE=1 SV=2
1454	2590	tr|F8WBC0|F8WBC0_HUMAN	35.39	34	34	646000	1	1	1		3504	Ras-related protein Rap-1b (Fragment) OS=Homo sapiens OX=9606 GN=RAP1B PE=4 SV=1
1454	2592	tr|F5H4H0|F5H4H0_HUMAN	35.39	23	23	646000	1	1	1		5351	Ras-related protein Rap-1b (Fragment) OS=Homo sapiens OX=9606 GN=RAP1B PE=4 SV=1
1454	2593	tr|F5GYH7|F5GYH7_HUMAN	35.39	21	21	646000	1	1	1		5955	Ras-related protein Rap-1b (Fragment) OS=Homo sapiens OX=9606 GN=RAP1B PE=1 SV=1
1454	2594	tr|F5H077|F5H077_HUMAN	35.39	13	13	646000	1	1	1		9421	Ras-related protein Rap-1b (Fragment) OS=Homo sapiens OX=9606 GN=RAP1B PE=1 SV=8
1454	2595	tr|F5GWU8|F5GWU8_HUMAN	35.39	13	13	646000	1	1	1		9721	Ras-related protein Rap-1b (Fragment) OS=Homo sapiens OX=9606 GN=RAP1B PE=1 SV=1
1454	2596	tr|F5H491|F5H491_HUMAN	35.39	12	12	646000	1	1	1		10399	Ras-related protein Rap-1b (Fragment) OS=Homo sapiens OX=9606 GN=RAP1B PE=1 SV=1
1454	2597	tr|F5H0B7|F5H0B7_HUMAN	35.39	11	11	646000	1	1	1		11041	Ras-related protein Rap-1b (Fragment) OS=Homo sapiens OX=9606 GN=RAP1B PE=1 SV=1
1454	2598	tr|F5H500|F5H500_HUMAN	35.39	11	11	646000	1	1	1		11395	Ras-related protein Rap-1b (Fragment) OS=Homo sapiens OX=9606 GN=RAP1B PE=1 SV=1
1454	2599	tr|F5H6R7|F5H6R7_HUMAN	35.39	9	9	646000	1	1	1		13753	Ras-related protein Rap-1b (Fragment) OS=Homo sapiens OX=9606 GN=RAP1B PE=1 SV=1
1454	2600	tr|F5H004|F5H004_HUMAN	35.39	9	9	646000	1	1	1		14293	Ras-related protein Rap-1b (Fragment) OS=Homo sapiens OX=9606 GN=RAP1B PE=1 SV=1
1454	2601	tr|A0A075B6Q0|A0A075B6Q0_HUMAN	35.39	9	9	646000	1	1	1		14597	Ras-related protein Rap-1A (Fragment) OS=Homo sapiens OX=9606 GN=RAP1A PE=1 SV=1
1454	2602	tr|F5GYB5|F5GYB5_HUMAN	35.39	8	8	646000	1	1	1		15467	Ras-related protein Rap-1b OS=Homo sapiens OX=9606 GN=RAP1B PE=1 SV=1
1454	2603	tr|F5GX62|F5GX62_HUMAN	35.39	8	8	646000	1	1	1		15747	Ras-related protein Rap-1b (Fragment) OS=Homo sapiens OX=9606 GN=RAP1B PE=1 SV=1
1454	2604	tr|E7ESV4|E7ESV4_HUMAN	35.39	7	7	646000	1	1	1		17682	Ras-related protein Rap-1b (Fragment) OS=Homo sapiens OX=9606 GN=RAP1B PE=1 SV=1
1454	2605	tr|F5H7Y6|F5H7Y6_HUMAN	35.39	6	6	646000	1	1	1		20400	Ras-related protein Rap-1b OS=Homo sapiens OX=9606 GN=RAP1B PE=1 SV=1
1454	2607	P61224|RAP1B_HUMAN	35.39	6	6	646000	1	1	1		20825	Ras-related protein Rap-1b OS=Homo sapiens OX=9606 GN=RAP1B PE=1 SV=1
1454	2606	P62834|RAP1A_HUMAN	35.39	6	6	646000	1	1	1		20987	Ras-related protein Rap-1A OS=Homo sapiens OX=9606 GN=RAP1A PE=1 SV=1
1458	2637	tr|H0Y4Y4|H0Y4Y4_HUMAN	35.25	4	4	604000	1	1	1		19593	EF-hand domain-containing protein D2 (Fragment) OS=Homo sapiens OX=9606 GN=EFHD2 PE=1 SV=1
1458	2649	Q96C19|EFHD2_HUMAN	35.25	3	3	604000	1	1	1		26697	EF-hand domain-containing protein D2 OS=Homo sapiens OX=9606 GN=EFHD2 PE=1 SV=1
1457	2626	Q9UN86|G3BP2_HUMAN	35.04	2	2	0	1	1	1		54121	Ras GTPase-activating protein-binding protein 2 OS=Homo sapiens OX=9606 GN=G3BP2 PE=1 SV=2
663	1604	P23284|PPIB_HUMAN	34.84	4	4	896000	1	1	1		23743	Peptidyl-prolyl cis-trans isomerase B OS=Homo sapiens OX=9606 GN=PPIB PE=1 SV=2
911	1762	P28482|MK01_HUMAN	34.52	2	2	1260000	1	1	1		41390	Mitogen-activated protein kinase 1 OS=Homo sapiens OX=9606 GN=MAPK1 PE=1 SV=3
923	2380	Q15555|MARE2_HUMAN	34.37	2	2	7010000	1	1	1		37031	Microtubule-associated protein RP/EB family member 2 OS=Homo sapiens OX=9606 GN=MAPRE2 PE=1 SV=1
540	1652	Q09666|AHNK_HUMAN	34.11	0	0	0	1	1	1		629114	Neuroblast differentiation-associated protein AHNAK OS=Homo sapiens OX=9606 GN=AHNAK PE=1 SV=2
1461	2654	tr|M0R389|M0R389_HUMAN	33.77	5	5	2340000	1	1	1		18356	Platelet-activating factor acetylhydrolase IB subunit gamma (Fragment) OS=Homo sapiens OX=9606 GN=PAFAH1B3 PE=1 SV=8
1461	2655	Q15102|PA1B3_HUMAN	33.77	4	4	2340000	1	1	1		25734	Platelet-activating factor acetylhydrolase IB subunit gamma OS=Homo sapiens OX=9606 GN=PAFAH1B3 PE=1 SV=1
1460	2650	tr|H3BN27|H3BN27_HUMAN	33.7	19	19	2320000	1	1	1		13105	Plasmolipin OS=Homo sapiens OX=9606 GN=PLLP PE=1 SV=1
1460	2651	tr|A0A087WYE0|A0A087WYE0_HUMAN	33.7	14	14	2320000	1	1	1		18014	Plasmolipin OS=Homo sapiens OX=9606 GN=PLLP PE=1 SV=1
1460	2652	Q9Y342|PLLP_HUMAN	33.7	13	13	2320000	1	1	1		19987	Plasmolipin OS=Homo sapiens OX=9606 GN=PLLP PE=1 SV=1
1463	2657	P11279|LAMP1_HUMAN	33.61	2	2	3380000	1	1	1		44882	Lysosome-associated membrane glycoprotein 1 OS=Homo sapiens OX=9606 GN=LAMP1 PE=1 SV=3
1471	2703	tr|I3L297|I3L297_HUMAN	33.57	3	3	607000	1	1	1		25504	Adapter molecule crk OS=Homo sapiens OX=9606 GN=CRK PE=1 SV=1
1471	2708	P46108|CRK_HUMAN	33.57	2	2	607000	1	1	1		33831	Adapter molecule crk OS=Homo sapiens OX=9606 GN=CRK PE=1 SV=2
1467	2664	P67870|CSK2B_HUMAN	33.5	4	4	0	1	1	1		24942	Casein kinase II subunit beta OS=Homo sapiens OX=9606 GN=CSNK2B PE=1 SV=1
1467	2665	tr|Q5SRQ3|Q5SRQ3_HUMAN	33.5	4	4	0	1	1	1		26673	Casein kinase II subunit beta OS=Homo sapiens OX=9606 GN=CSNK2B PE=1 SV=1
1467	2667	tr|Q5SRQ6|Q5SRQ6_HUMAN	33.5	3	3	0	1	1	1		26926	Casein kinase II subunit beta OS=Homo sapiens OX=9606 GN=CSNK2B PE=1 SV=2
1467	2670	tr|N0E472|N0E472_HUMAN	33.5	3	3	0	1	1	1		34805	Casein kinase II subunit beta OS=Homo sapiens OX=9606 GN=CSNK2B PE=1 SV=1
1467	2669	tr|A0A0G2JM12|A0A0G2JM12_HUMAN	33.5	3	3	0	1	1	1		34752	Casein kinase II subunit beta OS=Homo sapiens OX=9606 GN=CSNK2B PE=1 SV=1
1462	2656	O95881|TXD12_HUMAN	33.47	5	5	1130000	1	1	1		19206	Thioredoxin domain-containing protein 12 OS=Homo sapiens OX=9606 GN=TXNDC12 PE=1 SV=1
1469	2678	Q99963|SH3G3_HUMAN	33.17	2	2	684000	1	1	1		39285	Endophilin-A3 OS=Homo sapiens OX=9606 GN=SH3GL3 PE=1 SV=1
1464	2659	Q96QU6|1A1L1_HUMAN	33.11	2	2	616000	1	1	1		57324	1-aminocyclopropane-1-carboxylate synthase-like protein 1 OS=Homo sapiens OX=9606 GN=ACCS PE=1 SV=1
1470	2700	tr|B4DFI2|B4DFI2_HUMAN	32.98	4	4	0	1	1	1		18046	Claudin OS=Homo sapiens OX=9606 GN=CLDN11 PE=1 SV=1
1470	2704	O75508|CLD11_HUMAN	32.98	3	3	0	1	1	1		21993	Claudin-11 OS=Homo sapiens OX=9606 GN=CLDN11 PE=1 SV=2
901	1740	P02774|VTDB_HUMAN	32.96	2	2	441000	1	1	1	Carbamidomethylation	52964	Vitamin D-binding protein OS=Homo sapiens OX=9606 GN=GC PE=1 SV=1
901	1741	tr|D6RF35|D6RF35_HUMAN	32.96	2	2	441000	1	1	1	Carbamidomethylation	53021	Vitamin D-binding protein OS=Homo sapiens OX=9606 GN=GC PE=1 SV=1
1466	2662	O14548|COX7R_HUMAN	32.91	8	8	1240000	1	1	1		12615	Cytochrome c oxidase subunit 7A-related protein mitochondrial OS=Homo sapiens OX=9606 GN=COX7A2L PE=1 SV=2
1465	2660	tr|F5H6L7|F5H6L7_HUMAN	32.84	3	3	25600	1	1	1		74399	Sodium/calcium exchanger 2 OS=Homo sapiens OX=9606 GN=SLC8A2 PE=1 SV=1
1465	2661	Q9UPR5|NAC2_HUMAN	32.84	2	2	25600	1	1	1		100368	Sodium/calcium exchanger 2 OS=Homo sapiens OX=9606 GN=SLC8A2 PE=2 SV=2
1468	2675	tr|H3BPK3|H3BPK3_HUMAN	32.77	3	3	1220000	1	1	1		26424	Hydroxyacylglutathione hydrolase mitochondrial (Fragment) OS=Homo sapiens OX=9606 GN=HAGH PE=1 SV=1
1468	2677	tr|H3BPQ4|H3BPQ4_HUMAN	32.77	3	3	1220000	1	1	1		27913	Hydroxyacylglutathione hydrolase mitochondrial OS=Homo sapiens OX=9606 GN=HAGH PE=1 SV=1
1468	2680	Q16775|GLO2_HUMAN	32.77	3	3	1220000	1	1	1		33806	Hydroxyacylglutathione hydrolase mitochondrial OS=Homo sapiens OX=9606 GN=HAGH PE=1 SV=2
1474	2730	Q15628|TRADD_HUMAN	32.25	2	2	0	1	1	1		34247	Tumor necrosis factor receptor type 1-associated DEATH domain protein OS=Homo sapiens OX=9606 GN=TRADD PE=1 SV=2
1472	2707	P30679|GNA15_HUMAN	32.21	3	3	962000	1	1	1		43568	Guanine nucleotide-binding protein subunit alpha-15 OS=Homo sapiens OX=9606 GN=GNA15 PE=1 SV=2
1473	2709	P62072|TIM10_HUMAN	32.18	9	9	643000	1	1	1	Carbamidomethylation	10333	Mitochondrial import inner membrane translocase subunit Tim10 OS=Homo sapiens OX=9606 GN=TIMM10 PE=1 SV=1
1475	2737	tr|E9PS78|E9PS78_HUMAN	31.6	9	9	0	1	1	1		10703	Cathepsin B (Fragment) OS=Homo sapiens OX=9606 GN=CTSB PE=1 SV=1
1475	2738	tr|E9PR54|E9PR54_HUMAN	31.6	8	8	0	1	1	1		11375	Cathepsin B (Fragment) OS=Homo sapiens OX=9606 GN=CTSB PE=1 SV=1
1475	2739	tr|E9PJ67|E9PJ67_HUMAN	31.6	8	8	0	1	1	1		11760	Cathepsin B (Fragment) OS=Homo sapiens OX=9606 GN=CTSB PE=1 SV=1
1475	2740	tr|E9PCB3|E9PCB3_HUMAN	31.6	7	7	0	1	1	1		12682	Cathepsin B OS=Homo sapiens OX=9606 GN=CTSB PE=1 SV=2
1475	2741	tr|E9PKQ7|E9PKQ7_HUMAN	31.6	6	6	0	1	1	1		15377	Cathepsin B (Fragment) OS=Homo sapiens OX=9606 GN=CTSB PE=1 SV=1
1475	2742	tr|E9PNL5|E9PNL5_HUMAN	31.6	6	6	0	1	1	1		16082	Cathepsin B (Fragment) OS=Homo sapiens OX=9606 GN=CTSB PE=1 SV=1
1475	2743	tr|E9PHZ5|E9PHZ5_HUMAN	31.6	5	5	0	1	1	1		16576	Cathepsin B (Fragment) OS=Homo sapiens OX=9606 GN=CTSB PE=1 SV=8
1475	2744	tr|E9PLY3|E9PLY3_HUMAN	31.6	5	5	0	1	1	1		18515	Cathepsin B (Fragment) OS=Homo sapiens OX=9606 GN=CTSB PE=1 SV=1
1475	2745	tr|E9PSG5|E9PSG5_HUMAN	31.6	5	5	0	1	1	1		18929	Cathepsin B (Fragment) OS=Homo sapiens OX=9606 GN=CTSB PE=1 SV=1
1475	2747	tr|E9PQM1|E9PQM1_HUMAN	31.6	5	5	0	1	1	1		19478	Cathepsin B (Fragment) OS=Homo sapiens OX=9606 GN=CTSB PE=1 SV=1
1475	2767	P07858|CATB_HUMAN	31.6	2	2	0	1	1	1		37822	Cathepsin B OS=Homo sapiens OX=9606 GN=CTSB PE=1 SV=3
1476	2746	Q9NPD7|NRN1_HUMAN	31.51	6	6	4210000	1	1	1	Carbamidomethylation	15333	Neuritin OS=Homo sapiens OX=9606 GN=NRN1 PE=2 SV=1
1476	2764	tr|A0A087WWT2|A0A087WWT2_HUMAN	31.51	5	5	4210000	1	1	1	Carbamidomethylation	18107	Neuritin OS=Homo sapiens OX=9606 GN=NRN1 PE=1 SV=1
931	2768	P47985|UCRI_HUMAN	31.23	3	3	2760000	1	1	1		29668	Cytochrome b-c1 complex subunit Rieske mitochondrial OS=Homo sapiens OX=9606 GN=UQCRFS1 PE=1 SV=2
931	2769	P0C7P4|UCRIL_HUMAN	31.23	3	3	2760000	1	1	1		30815	Putative cytochrome b-c1 complex subunit Rieske-like protein 1 OS=Homo sapiens OX=9606 GN=UQCRFS1P1 PE=5 SV=1
1477	2749	tr|I3L4T1|I3L4T1_HUMAN	31.06	31	31	337000	1	1	1		3731	Mannose-P-dolichol utilization defect 1 protein (Fragment) OS=Homo sapiens OX=9606 GN=MPDU1 PE=1 SV=2
1477	2750	tr|J3KSI4|J3KSI4_HUMAN	31.06	19	19	337000	1	1	1		5786	Mannose-P-dolichol utilization defect 1 protein OS=Homo sapiens OX=9606 GN=MPDU1 PE=1 SV=1
1477	2751	tr|I3L405|I3L405_HUMAN	31.06	19	19	337000	1	1	1		5855	Mannose-P-dolichol utilization defect 1 protein (Fragment) OS=Homo sapiens OX=9606 GN=MPDU1 PE=1 SV=2
1477	2753	tr|I3L1D2|I3L1D2_HUMAN	31.06	16	16	337000	1	1	1		6479	Mannose-P-dolichol utilization defect 1 protein OS=Homo sapiens OX=9606 GN=MPDU1 PE=1 SV=1
1477	2752	tr|I3L261|I3L261_HUMAN	31.06	16	16	337000	1	1	1		6616	Mannose-P-dolichol utilization defect 1 protein (Fragment) OS=Homo sapiens OX=9606 GN=MPDU1 PE=1 SV=2
1477	2754	tr|I3L4E0|I3L4E0_HUMAN	31.06	13	13	337000	1	1	1		8169	Mannose-P-dolichol utilization defect 1 protein OS=Homo sapiens OX=9606 GN=MPDU1 PE=1 SV=1
1477	2755	tr|J3QS48|J3QS48_HUMAN	31.06	10	10	337000	1	1	1		10978	Mannose-P-dolichol utilization defect 1 protein OS=Homo sapiens OX=9606 GN=MPDU1 PE=1 SV=1
1477	2756	tr|I3L295|I3L295_HUMAN	31.06	9	9	337000	1	1	1		11802	Mannose-P-dolichol utilization defect 1 isoform 2 OS=Homo sapiens OX=9606 GN=MPDU1 PE=1 SV=1
1477	2757	tr|J3KTK8|J3KTK8_HUMAN	31.06	9	9	337000	1	1	1		12674	Mannose-P-dolichol utilization defect 1 protein (Fragment) OS=Homo sapiens OX=9606 GN=MPDU1 PE=1 SV=1
1477	2759	tr|J3QQZ4|J3QQZ4_HUMAN	31.06	7	7	337000	1	1	1		16663	Mannose-P-dolichol utilization defect 1 protein (Fragment) OS=Homo sapiens OX=9606 GN=MPDU1 PE=1 SV=1
1477	2760	tr|J3KT75|J3KT75_HUMAN	31.06	6	6	337000	1	1	1		16506	Mannose-P-dolichol utilization defect 1 protein (Fragment) OS=Homo sapiens OX=9606 GN=MPDU1 PE=1 SV=1
1477	2761	tr|J3QW43|J3QW43_HUMAN	31.06	5	5	337000	1	1	1		20925	Mannose-P-dolichol utilization defect 1 protein OS=Homo sapiens OX=9606 GN=MPDU1 PE=1 SV=1
1477	2762	tr|J3QRD5|J3QRD5_HUMAN	31.06	5	5	337000	1	1	1		20710	Mannose-P-dolichol utilization defect 1 protein (Fragment) OS=Homo sapiens OX=9606 GN=MPDU1 PE=1 SV=8
1477	2763	O75352|MPU1_HUMAN	31.06	4	4	337000	1	1	1		26638	Mannose-P-dolichol utilization defect 1 protein OS=Homo sapiens OX=9606 GN=MPDU1 PE=1 SV=2
680	2772	Q4VX76|SYTL3_HUMAN	31.01	1	1	23500000	1	1	2		68560	Synaptotagmin-like protein 3 OS=Homo sapiens OX=9606 GN=SYTL3 PE=2 SV=3
1479	2774	P43007|SATT_HUMAN	30.28	2	2	727000	1	1	1		55723	Neutral amino acid transporter A OS=Homo sapiens OX=9606 GN=SLC1A4 PE=1 SV=1
1480	2775	tr|E5RJ09|E5RJ09_HUMAN	30.26	6	6	0	1	1	1		22316	Erlin-2 (Fragment) OS=Homo sapiens OX=9606 GN=ERLIN2 PE=1 SV=1
1480	2776	tr|E5RHW4|E5RHW4_HUMAN	30.26	3	3	0	1	1	1		37725	Erlin-2 (Fragment) OS=Homo sapiens OX=9606 GN=ERLIN2 PE=1 SV=1
1480	2777	O94905|ERLN2_HUMAN	30.26	3	3	0	1	1	1		37840	Erlin-2 OS=Homo sapiens OX=9606 GN=ERLIN2 PE=1 SV=1
1481	2784	tr|E9PHG0|E9PHG0_HUMAN	30.08	4	4	0	1	1	1		20697	Kell blood group glycoprotein (Fragment) OS=Homo sapiens OX=9606 GN=KEL PE=1 SV=1
933	2780	tr|J3KNE3|J3KNE3_HUMAN	29.99	5	5	4250000	1	1	2		18357	Platelet-activating factor acetylhydrolase IB subunit beta (Fragment) OS=Homo sapiens OX=9606 GN=PAFAH1B2 PE=1 SV=1
933	2781	P68402|PA1B2_HUMAN	29.99	4	4	4250000	1	1	2		25569	Platelet-activating factor acetylhydrolase IB subunit beta OS=Homo sapiens OX=9606 GN=PAFAH1B2 PE=1 SV=1
1482	2796	tr|D6RC06|D6RC06_HUMAN	29.74	11	11	2520000	1	1	1		7324	Histidine triad nucleotide-binding protein 1 OS=Homo sapiens OX=9606 GN=HINT1 PE=1 SV=1
1482	2798	tr|D6REP8|D6REP8_HUMAN	29.74	9	9	2520000	1	1	1		8708	Histidine triad nucleotide-binding protein 1 OS=Homo sapiens OX=9606 GN=HINT1 PE=1 SV=1
1482	2797	tr|D6RE99|D6RE99_HUMAN	29.74	9	9	2520000	1	1	1		8634	Histidine triad nucleotide-binding protein 1 OS=Homo sapiens OX=9606 GN=HINT1 PE=1 SV=1
1482	2800	tr|D6RD60|D6RD60_HUMAN	29.74	7	7	2520000	1	1	1		11547	Histidine triad nucleotide-binding protein 1 OS=Homo sapiens OX=9606 GN=HINT1 PE=1 SV=1
1482	2803	P49773|HINT1_HUMAN	29.74	6	6	2520000	1	1	1		13802	Histidine triad nucleotide-binding protein 1 OS=Homo sapiens OX=9606 GN=HINT1 PE=1 SV=2
914	1777	Q9BW30|TPPP3_HUMAN	29.68	5	5	2710000	1	1	1		18985	Tubulin polymerization-promoting protein family member 3 OS=Homo sapiens OX=9606 GN=TPPP3 PE=1 SV=1
1483	2801	tr|K7ENI8|K7ENI8_HUMAN	29.36	39	39	0	1	1	1		4206	Carbonic anhydrase 4 (Fragment) OS=Homo sapiens OX=9606 GN=CA4 PE=1 SV=1
1483	2802	P22748|CAH4_HUMAN	29.36	5	5	0	1	1	1		35032	Carbonic anhydrase 4 OS=Homo sapiens OX=9606 GN=CA4 PE=1 SV=2
1485	2813	tr|E9PH05|E9PH05_HUMAN	29.33	5	5	5780000	1	1	1		15959	Protein FAM162A OS=Homo sapiens OX=9606 GN=FAM162A PE=1 SV=1
1485	2815	tr|F8W7Q4|F8W7Q4_HUMAN	29.33	5	5	5780000	1	1	1		16515	Protein FAM162A OS=Homo sapiens OX=9606 GN=FAM162A PE=1 SV=1
1485	2816	Q96A26|F162A_HUMAN	29.33	5	5	5780000	1	1	1		17342	Protein FAM162A OS=Homo sapiens OX=9606 GN=FAM162A PE=1 SV=2
924	2457	tr|A0A0D9SEI9|A0A0D9SEI9_HUMAN	29.3	4	4	2850000	1	1	1		21011	Mitochondrial glutamate carrier 1 (Fragment) OS=Homo sapiens OX=9606 GN=SLC25A22 PE=1 SV=1
924	2464	tr|A0A0D9SFE1|A0A0D9SFE1_HUMAN	29.3	3	3	2850000	1	1	1		26215	Mitochondrial glutamate carrier 1 (Fragment) OS=Homo sapiens OX=9606 GN=SLC25A22 PE=1 SV=1
924	2471	tr|E9PJH7|E9PJH7_HUMAN	29.3	3	3	2850000	1	1	1		33282	Mitochondrial glutamate carrier 1 (Fragment) OS=Homo sapiens OX=9606 GN=SLC25A22 PE=1 SV=5
924	2472	Q9H936|GHC1_HUMAN	29.3	2	2	2850000	1	1	1		34470	Mitochondrial glutamate carrier 1 OS=Homo sapiens OX=9606 GN=SLC25A22 PE=1 SV=1
1484	2806	tr|F8VSL7|F8VSL7_HUMAN	29.22	5	5	1510000	1	1	1		18699	Erythrocyte band 7 integral membrane protein OS=Homo sapiens OX=9606 GN=STOM PE=1 SV=1
1484	2808	P27105|STOM_HUMAN	29.22	3	3	1510000	1	1	1		31731	Erythrocyte band 7 integral membrane protein OS=Homo sapiens OX=9606 GN=STOM PE=1 SV=3
1484	2809	Q8TAV4|STML3_HUMAN	29.22	3	3	1510000	1	1	1		32135	Stomatin-like protein 3 OS=Homo sapiens OX=9606 GN=STOML3 PE=1 SV=1
1486	2818	P17858|PFKAL_HUMAN	28.95	1	1	0	1	1	1		85018	ATP-dependent 6-phosphofructokinase liver type OS=Homo sapiens OX=9606 GN=PFKL PE=1 SV=6
1489	2831	tr|A0A140T963|A0A140T963_HUMAN	28.92	3	3	791000	1	1	1		25416	RNF103-CHMP3 readthrough (Fragment) OS=Homo sapiens OX=9606 GN=RNF103-CHMP3 PE=4 SV=1
1489	2832	Q9Y3E7|CHMP3_HUMAN	28.92	3	3	791000	1	1	1		25073	Charged multivesicular body protein 3 OS=Homo sapiens OX=9606 GN=CHMP3 PE=1 SV=3
1487	2824	Q9UDW1|QCR9_HUMAN	28.71	11	11	0	1	1	1		7308	Cytochrome b-c1 complex subunit 9 OS=Homo sapiens OX=9606 GN=UQCR10 PE=1 SV=3
1492	2842	tr|A0A087WY71|A0A087WY71_HUMAN	28.54	2	2	976000	1	1	1		49527	AP-2 complex subunit mu OS=Homo sapiens OX=9606 GN=AP2M1 PE=1 SV=1
1492	2843	Q96CW1|AP2M1_HUMAN	28.54	2	2	976000	1	1	1		49655	AP-2 complex subunit mu OS=Homo sapiens OX=9606 GN=AP2M1 PE=1 SV=2
1492	2847	tr|E9PFW3|E9PFW3_HUMAN	28.54	2	2	976000	1	1	1		52304	AP-2 complex subunit mu OS=Homo sapiens OX=9606 GN=AP2M1 PE=1 SV=1
549	2825	tr|H0YA83|H0YA83_HUMAN	28.49	5	5	2750000000	1	1	2		19531	Beta-hexosaminidase subunit beta (Fragment) OS=Homo sapiens OX=9606 GN=HEXB PE=1 SV=1
549	2827	tr|H0Y9B6|H0Y9B6_HUMAN	28.49	4	4	2750000000	1	1	2		23258	Beta-hexosaminidase subunit beta (Fragment) OS=Homo sapiens OX=9606 GN=HEXB PE=1 SV=1
549	2829	tr|Q5URX0|Q5URX0_HUMAN	28.49	2	2	2750000000	1	1	2		38258	Beta-hexosaminidase subunit beta OS=Homo sapiens OX=9606 GN=HEL-248 PE=1 SV=1
549	2834	P07686|HEXB_HUMAN	28.49	1	1	2750000000	1	1	2		63111	Beta-hexosaminidase subunit beta OS=Homo sapiens OX=9606 GN=HEXB PE=1 SV=3
1488	2828	Q8TD35|LKAM1_HUMAN	28.42	4	4	1960000	1	1	1		21508	Protein LKAAEAR1 OS=Homo sapiens OX=9606 GN=LKAAEAR1 PE=2 SV=3
1488	2830	tr|Q9UG54|Q9UG54_HUMAN	28.42	3	3	1960000	1	1	1		28870	Mitogen-activated protein kinase kinase kinase 7 OS=Homo sapiens OX=9606 GN=MAP3K7 PE=1 SV=1
1488	2835	O43318|M3K7_HUMAN	28.42	1	1	1960000	1	1	1		67196	Mitogen-activated protein kinase kinase kinase 7 OS=Homo sapiens OX=9606 GN=MAP3K7 PE=1 SV=1
1491	2838	P62745|RHOB_HUMAN	28.26	4	4	2350000	1	1	1		22123	Rho-related GTP-binding protein RhoB OS=Homo sapiens OX=9606 GN=RHOB PE=1 SV=1
1493	2854	Q9HCJ6|VAT1L_HUMAN	28.09	2	2	1150000	1	1	1		45899	Synaptic vesicle membrane protein VAT-1 homolog-like OS=Homo sapiens OX=9606 GN=VAT1L PE=1 SV=2
1494	2882	tr|F1T0D7|F1T0D7_HUMAN	27.74	3	3	1410000	1	1	1		42346	LIM/homeobox protein Lhx3 OS=Homo sapiens OX=9606 GN=LHX3 PE=2 SV=1
1494	2883	Q969G2|LHX4_HUMAN	27.74	3	3	1410000	1	1	1		43124	LIM/homeobox protein Lhx4 OS=Homo sapiens OX=9606 GN=LHX4 PE=1 SV=2
1494	2884	Q9UBR4|LHX3_HUMAN	27.74	3	3	1410000	1	1	1		43358	LIM/homeobox protein Lhx3 OS=Homo sapiens OX=9606 GN=LHX3 PE=1 SV=2
1496	2893	tr|K7ER96|K7ER96_HUMAN	27.32	2	2	1160000	1	1	1		31474	Thioredoxin-like protein 1 (Fragment) OS=Homo sapiens OX=9606 GN=TXNL1 PE=1 SV=1
1496	2895	O43396|TXNL1_HUMAN	27.32	2	2	1160000	1	1	1		32251	Thioredoxin-like protein 1 OS=Homo sapiens OX=9606 GN=TXNL1 PE=1 SV=3
1495	2888	tr|C9J3L8|C9J3L8_HUMAN	27.17	3	3	0	1	1	1		29573	Translocon-associated protein subunit alpha OS=Homo sapiens OX=9606 GN=SSR1 PE=1 SV=1
1495	2889	tr|C9J5W0|C9J5W0_HUMAN	27.17	3	3	0	1	1	1		29932	Translocon-associated protein subunit alpha OS=Homo sapiens OX=9606 GN=SSR1 PE=1 SV=1
1495	2890	P43307|SSRA_HUMAN	27.17	3	3	0	1	1	1		32235	Translocon-associated protein subunit alpha OS=Homo sapiens OX=9606 GN=SSR1 PE=1 SV=3
1495	2891	tr|E9PAL7|E9PAL7_HUMAN	27.17	3	3	0	1	1	1		32895	Translocon-associated protein subunit alpha OS=Homo sapiens OX=9606 GN=SSR1 PE=1 SV=1
1495	2892	tr|C9IZQ1|C9IZQ1_HUMAN	27.17	3	3	0	1	1	1		33887	Translocon-associated protein subunit alpha OS=Homo sapiens OX=9606 GN=SSR1 PE=1 SV=1
547	2696	Q96RL7|VP13A_HUMAN	26.63	0	0	8780000	1	1	2		360277	Vacuolar protein sorting-associated protein 13A OS=Homo sapiens OX=9606 GN=VPS13A PE=1 SV=2
1498	2899	Q02750|MP2K1_HUMAN	26.58	2	2	1970000	1	1	1		43439	Dual specificity mitogen-activated protein kinase kinase 1 OS=Homo sapiens OX=9606 GN=MAP2K1 PE=1 SV=2
1500	2912	P57052|RBM11_HUMAN	26.32	2	2	0	1	1	1		32179	Splicing regulator RBM11 OS=Homo sapiens OX=9606 GN=RBM11 PE=1 SV=1
1499	2907	tr|K7EKE6|K7EKE6_HUMAN	26.09	2	2	548000	1	1	1		95180	Lon protease homolog mitochondrial OS=Homo sapiens OX=9606 GN=LONP1 PE=1 SV=1
671	1753	P35052|GPC1_HUMAN	26.02	1	1	1190000	1	1	1		61680	Glypican-1 OS=Homo sapiens OX=9606 GN=GPC1 PE=1 SV=2
1503	2930	Q3YEC7|RABL6_HUMAN	25.96	1	1	708000	1	1	1		79549	Rab-like protein 6 OS=Homo sapiens OX=9606 GN=RABL6 PE=1 SV=2
1503	2931	tr|H0Y4Z8|H0Y4Z8_HUMAN	25.96	1	1	708000	1	1	1		79636	Chromosome 9 open reading frame 86 isoform CRA_b OS=Homo sapiens OX=9606 GN=RABL6 PE=1 SV=2
937	2885	Q14204|DYHC1_HUMAN	25.81	0	0	0	1	1	1		532412	Cytoplasmic dynein 1 heavy chain 1 OS=Homo sapiens OX=9606 GN=DYNC1H1 PE=1 SV=5
939	2910	tr|G3V556|G3V556_HUMAN	25.46	7	7	9500000	1	1	1		11281	ATP synthase membrane subunit 6.8PL OS=Homo sapiens OX=9606 GN=ATP5MPL PE=1 SV=1
677	2544	tr|F5H7V9|F5H7V9_HUMAN	25.4	1	1	0	1	1	1		201142	Tenascin OS=Homo sapiens OX=9606 GN=TNC PE=1 SV=1
677	2545	tr|E9PC84|E9PC84_HUMAN	25.4	1	1	0	1	1	1		210852	Tenascin OS=Homo sapiens OX=9606 GN=TNC PE=1 SV=1
677	2546	tr|J3QSU6|J3QSU6_HUMAN	25.4	0	0	0	1	1	1		220851	Tenascin OS=Homo sapiens OX=9606 GN=TNC PE=1 SV=1
677	2549	P24821|TENA_HUMAN	25.4	0	0	0	1	1	1		240851	Tenascin OS=Homo sapiens OX=9606 GN=TNC PE=1 SV=3
1504	2934	Q9UHG3|PCYOX_HUMAN	24.82	3	3	286000	1	1	1		56640	Prenylcysteine oxidase 1 OS=Homo sapiens OX=9606 GN=PCYOX1 PE=1 SV=3
936	2881	Q9HCM2|PLXA4_HUMAN	24.82	0	0	2570000	1	1	1	Carbamidomethylation	212454	Plexin-A4 OS=Homo sapiens OX=9606 GN=PLXNA4 PE=1 SV=4
946	2951	tr|J3KRA9|J3KRA9_HUMAN	24.81	0	0	804000	1	1	1		398840	Serine/threonine-protein kinase SMG1 (Fragment) OS=Homo sapiens OX=9606 GN=SMG1 PE=1 SV=1
946	2952	Q96Q15|SMG1_HUMAN	24.81	0	0	804000	1	1	1		410501	Serine/threonine-protein kinase SMG1 OS=Homo sapiens OX=9606 GN=SMG1 PE=1 SV=3
943	2940	tr|A0A087WTD7|A0A087WTD7_HUMAN	24.79	1	1	40700000	1	1	1		161184	A-kinase anchor protein 13 OS=Homo sapiens OX=9606 GN=AKAP13 PE=1 SV=1
943	2941	tr|A8MYJ1|A8MYJ1_HUMAN	24.79	1	1	40700000	1	1	1		161840	A-kinase anchor protein 13 OS=Homo sapiens OX=9606 GN=AKAP13 PE=1 SV=3
943	2944	Q12802|AKP13_HUMAN	24.79	0	0	40700000	1	1	1		307550	A-kinase anchor protein 13 OS=Homo sapiens OX=9606 GN=AKAP13 PE=1 SV=2
1505	2943	P00390|GSHR_HUMAN	24.76	1	1	0	1	1	1		56257	Glutathione reductase mitochondrial OS=Homo sapiens OX=9606 GN=GSR PE=1 SV=2
938	2903	tr|A0A087WV20|A0A087WV20_HUMAN	24.7	0	0	993000	1	1	1		425238	Alstrom syndrome protein 1 OS=Homo sapiens OX=9606 GN=ALMS1 PE=1 SV=1
938	2904	tr|A0A087WTU9|A0A087WTU9_HUMAN	24.7	0	0	993000	1	1	1		456422	Alstrom syndrome protein 1 OS=Homo sapiens OX=9606 GN=ALMS1 PE=1 SV=1
938	2905	Q8TCU4|ALMS1_HUMAN	24.7	0	0	993000	1	1	1		460969	Alstrom syndrome protein 1 OS=Homo sapiens OX=9606 GN=ALMS1 PE=1 SV=3
938	2906	tr|A0A087WZY3|A0A087WZY3_HUMAN	24.7	0	0	993000	1	1	1		461066	Alstrom syndrome protein 1 OS=Homo sapiens OX=9606 GN=ALMS1 PE=1 SV=1
942	2938	tr|F8WDV0|F8WDV0_HUMAN	24.7	1	1	3240000	1	1	2		99708	Importin-11 OS=Homo sapiens OX=9606 GN=IPO11 PE=1 SV=1
942	2939	Q9UI26|IPO11_HUMAN	24.7	1	1	3240000	1	1	2		112535	Importin-11 OS=Homo sapiens OX=9606 GN=IPO11 PE=1 SV=1
1506	2955	tr|H0YKS4|H0YKS4_HUMAN	24.5	8	8	305000	1	1	1		19530	Annexin (Fragment) OS=Homo sapiens OX=9606 GN=ANXA2 PE=1 SV=1
1506	2956	tr|H0YMU9|H0YMU9_HUMAN	24.5	6	6	305000	1	1	1		25569	Annexin OS=Homo sapiens OX=9606 GN=ANXA2 PE=1 SV=1
1507	2959	O14949|QCR8_HUMAN	24.35	9	9	11400000	1	1	1		9906	Cytochrome b-c1 complex subunit 8 OS=Homo sapiens OX=9606 GN=UQCRQ PE=1 SV=4
1509	2965	Q8IX12|CCAR1_HUMAN	24.11	1	1	52900000	1	1	1		132821	Cell division cycle and apoptosis regulator protein 1 OS=Homo sapiens OX=9606 GN=CCAR1 PE=1 SV=2
